# Supplementary material
Source: publisher figshare collection journal article supplement (https://acs.figshare.com/ndownloader/files/7670737)
Supplement: Supplementary file 1 [file 7670737]

 
data_rrl25 
  
_audit_creation_method            SHELXL-2014 
_chemical_name_systematic 
; 
 ? 
; 
_chemical_name_common             ? 
_chemical_melting_point           ? 
_chemical_formula_moiety          ? 
_chemical_formula_sum 
 'C30 H45 Th' 
_chemical_formula_weight          637.70 
  
loop_ 
 _atom_type_symbol 
 _atom_type_description 
 _atom_type_scat_dispersion_real 
 _atom_type_scat_dispersion_imag 
 _atom_type_scat_source 
 'C'  'C'   0.0033   0.0016 
 'International Tables Vol C Tables 4.2.6.8 and 6.1.1.4' 
 'H'  'H'   0.0000   0.0000 
 'International Tables Vol C Tables 4.2.6.8 and 6.1.1.4' 
 'Th'  'Th'  -7.2400   8.8979 
 'International Tables Vol C Tables 4.2.6.8 and 6.1.1.4' 
  
_space_group_crystal_system       hexagonal 
_space_group_IT_number            176 
_space_group_name_H-M_alt         'P 63/m' 
_space_group_name_Hall            '-P 6c' 
  
_shelx_space_group_comment 
; 
The symmetry employed for this shelxl refinement is uniquely defined 
by the following loop, which should always be used as a source of 
symmetry information in preference to the above space-group names. 
They are only intended as comments. 
; 
  
loop_ 
 _space_group_symop_operation_xyz 
 'x, y, z' 
 '-y, x-y, z' 
 '-x+y, -x, z' 
 '-x, -y, z+1/2' 
 'y, -x+y, z+1/2' 
 'x-y, x, z+1/2' 
 '-x, -y, -z' 
 'y, -x+y, -z' 
 'x-y, x, -z' 
 'x, y, -z-1/2' 
 '-y, x-y, -z-1/2' 
 '-x+y, -x, -z-1/2' 
  
_cell_length_a                    10.017(2) 
_cell_length_b                    10.017(2) 
_cell_length_c                    15.418(3) 
_cell_angle_alpha                 90 
_cell_angle_beta                  90 
_cell_angle_gamma                 120 
_cell_volume                      1339.6(6) 
_cell_formula_units_Z             2 
_cell_measurement_temperature     88(2) 
_cell_measurement_reflns_used     9934 
_cell_measurement_theta_min       2.35 
_cell_measurement_theta_max       28.95 
  
_exptl_crystal_description        plate 
_exptl_crystal_colour             blue 
_exptl_crystal_density_meas       not_measured 
_exptl_crystal_density_method     not_measured 
_exptl_crystal_density_diffrn     1.581 
_exptl_crystal_F_000              630 
_exptl_transmission_factor_min    ? 
_exptl_transmission_factor_max    ? 
_exptl_crystal_size_max           0.270 
_exptl_crystal_size_mid           0.176 
_exptl_crystal_size_min           0.058 
_exptl_absorpt_coefficient_mu     5.580 
_shelx_estimated_absorpt_T_min    0.314 
_shelx_estimated_absorpt_T_max    0.738 
_exptl_absorpt_correction_type    multi-scan 
_exptl_absorpt_correction_T_min   0.2921 
_exptl_absorpt_correction_T_max   0.4317 
_exptl_absorpt_process_details    'Bruker SADABS 2012/1' 
  
_exptl_special_details 
; 
 ? 
; 
  
_diffrn_ambient_temperature       88(2) 
_diffrn_radiation_wavelength      0.71073 
_diffrn_radiation_type            MoK\a 
_diffrn_source                    'fine-focus sealed tube' 
_diffrn_measurement_device_type   'Bruker SMART APEX II CCD' 
_diffrn_measurement_method        '\f and \w scans' 
_diffrn_detector_area_resol_mean  ? 
_diffrn_reflns_number             16418 
_diffrn_reflns_av_unetI/netI      0.0121 
_diffrn_reflns_av_R_equivalents   0.0262 
_diffrn_reflns_limit_h_min        -13 
_diffrn_reflns_limit_h_max        13 
_diffrn_reflns_limit_k_min        -13 
_diffrn_reflns_limit_k_max        12 
_diffrn_reflns_limit_l_min        -20 
_diffrn_reflns_limit_l_max        19 
_diffrn_reflns_theta_min          2.348 
_diffrn_reflns_theta_max          29.024 
_diffrn_reflns_theta_full         25.242 
_diffrn_measured_fraction_theta_max   0.983 
_diffrn_measured_fraction_theta_full  1.000 
_diffrn_reflns_Laue_measured_fraction_max    0.983 
_diffrn_reflns_Laue_measured_fraction_full   1.000 
_diffrn_reflns_point_group_measured_fraction_max   0.983 
_diffrn_reflns_point_group_measured_fraction_full  1.000 
_reflns_number_total              1217 
_reflns_number_gt                 1131 
_reflns_threshold_expression      'I > 2\s(I)' 
_reflns_Friedel_coverage          0.000 
_reflns_Friedel_fraction_max      . 
_reflns_Friedel_fraction_full     . 
  
_reflns_special_details 
; 
 Reflections were merged by SHELXL according to the crystal 
 class for the calculation of statistics and refinement. 
  
 _reflns_Friedel_fraction is defined as the number of unique 
 Friedel pairs measured divided by the number that would be 
 possible theoretically, ignoring centric projections and 
 systematic absences. 
; 
  
_computing_data_collection        'Bruker APEX2 2014.1-1, 2014' 
_computing_cell_refinement        'Bruker SAINT 8.34a, 2013' 
_computing_data_reduction         'Bruker SAINT 8.34a, 2013' 
_computing_structure_solution     'Bruker SHELXTL 2013/1' 
_computing_structure_refinement   'SHELXL-2014 (Sheldrick, 2014)' 
_computing_molecular_graphics     'Bruker SHELXTL' 
_computing_publication_material   'Bruker SHELXTL' 
  
_refine_special_details 
; 
 ? 
; 
_refine_ls_structure_factor_coef  Fsqd 
_refine_ls_matrix_type            full 
_refine_ls_weighting_scheme       calc 
_refine_ls_weighting_details 
'w=1/[\s^2^(Fo^2^)+(0.0199P)^2^+0.3908P] where P=(Fo^2^+2Fc^2^)/3' 
_atom_sites_solution_primary      direct 
_atom_sites_solution_secondary    difmap 
_atom_sites_solution_hydrogens    difmap 
_refine_ls_hydrogen_treatment     refall 
_refine_ls_extinction_method      none 
_refine_ls_extinction_coef        ? 
_refine_ls_number_reflns          1217 
_refine_ls_number_parameters      75 
_refine_ls_number_restraints      0 
_refine_ls_R_factor_all           0.0146 
_refine_ls_R_factor_gt            0.0130 
_refine_ls_wR_factor_ref          0.0333 
_refine_ls_wR_factor_gt           0.0328 
_refine_ls_goodness_of_fit_ref    1.117 
_refine_ls_restrained_S_all       1.117 
_refine_ls_shift/su_max           0.000 
_refine_ls_shift/su_mean          0.000 
  
loop_ 
 _atom_site_label 
 _atom_site_type_symbol 
 _atom_site_fract_x 
 _atom_site_fract_y 
 _atom_site_fract_z 
 _atom_site_U_iso_or_equiv 
 _atom_site_adp_type 
 _atom_site_occupancy 
 _atom_site_site_symmetry_order 
 _atom_site_calc_flag 
 _atom_site_refinement_flags_posn 
 _atom_site_refinement_flags_adp 
 _atom_site_refinement_flags_occupancy 
 _atom_site_disorder_assembly 
 _atom_site_disorder_group 
Th1 Th 0.3333 0.6667 0.2500 0.01636(5) Uani 1 6 d S T P . . 
C1 C 0.1393(3) 0.3294(2) 0.2500 0.0236(5) Uani 1 2 d S T P . . 
C2 C 0.2345(2) 0.36945(19) 0.32404(11) 0.0231(3) Uani 1 1 d . . . . . 
C3 C 0.38834(18) 0.42292(17) 0.29594(11) 0.0189(3) Uani 1 1 d . . . . . 
C4 C -0.0313(3) 0.2171(3) 0.2500 0.0517(11) Uani 1 2 d S T P . . 
C5 C 0.1812(4) 0.3260(4) 0.41614(17) 0.0552(8) Uani 1 1 d . . . . . 
C6 C 0.5125(3) 0.4383(2) 0.35648(16) 0.0370(5) Uani 1 1 d . . . . . 
H4A H -0.042(5) 0.120(5) 0.2500 0.075(4) Uiso 1 2 d S . P . . 
H4B H -0.078(4) 0.219(4) 0.303(2) 0.075(4) Uiso 1 1 d . . . . . 
H5A H 0.179(4) 0.230(4) 0.431(2) 0.075(4) Uiso 1 1 d . . . . . 
H5B H 0.085(4) 0.313(4) 0.422(2) 0.075(4) Uiso 1 1 d . . . . . 
H5C H 0.243(4) 0.405(4) 0.452(2) 0.075(4) Uiso 1 1 d . . . . . 
H6A H 0.553(4) 0.523(4) 0.396(2) 0.075(4) Uiso 1 1 d . . . . . 
H6B H 0.476(4) 0.344(4) 0.392(2) 0.075(4) Uiso 1 1 d . . . . . 
H6C H 0.601(4) 0.450(3) 0.323(2) 0.075(4) Uiso 1 1 d . . . . . 
  
loop_ 
 _atom_site_aniso_label 
 _atom_site_aniso_U_11 
 _atom_site_aniso_U_22 
 _atom_site_aniso_U_33 
 _atom_site_aniso_U_23 
 _atom_site_aniso_U_13 
 _atom_site_aniso_U_12 
Th1 0.00830(6) 0.00830(6) 0.03248(9) 0.000 0.000 0.00415(3) 
C1 0.0146(10) 0.0107(10) 0.0468(15) 0.000 0.000 0.0073(8) 
C2 0.0254(8) 0.0200(8) 0.0296(9) 0.0081(6) 0.0071(7) 0.0157(7) 
C3 0.0188(7) 0.0130(7) 0.0279(8) -0.0015(6) -0.0036(6) 0.0101(6) 
C4 0.0149(13) 0.0147(12) 0.121(4) 0.000 0.000 0.0044(10) 
C5 0.083(2) 0.073(2) 0.0418(13) 0.0316(12) 0.0316(13) 0.0634(19) 
C6 0.0390(11) 0.0240(9) 0.0533(13) -0.0067(9) -0.0247(10) 0.0198(9) 
  
_geom_special_details 
; 
 All esds (except the esd in the dihedral angle between two l.s. planes) 
 are estimated using the full covariance matrix.  The cell esds are taken 
 into account individually in the estimation of esds in distances, angles 
 and torsion angles; correlations between esds in cell parameters are only 
 used when they are defined by crystal symmetry.  An approximate (isotropic) 
 treatment of cell esds is used for estimating esds involving l.s. planes. 
; 
  
loop_ 
 _geom_bond_atom_site_label_1 
 _geom_bond_atom_site_label_2 
 _geom_bond_distance 
 _geom_bond_site_symmetry_2 
 _geom_bond_publ_flag 
Th1 Cnt 2.607 . ? 
Th1 C3 2.8481(16) . ? 
Th1 C2 2.8635(17) . ? 
Th1 C1 2.937(2) . ? 
C1 C2 1.411(2) . ? 
C1 C4 1.504(4) . ? 
C2 C3 1.422(2) . ? 
C2 C5 1.503(3) . ? 
C3 C3 1.417(3) 10_556 ? 
C3 C6 1.500(2) . ? 
  
loop_ 
 _geom_angle_atom_site_label_1 
 _geom_angle_atom_site_label_2 
 _geom_angle_atom_site_label_3 
 _geom_angle 
 _geom_angle_site_symmetry_1 
 _geom_angle_site_symmetry_3 
 _geom_angle_publ_flag 
Cnt Th1 Cnt 120.00 . . ? 
C3 Th1 C3 28.80(7) 12_566 3_565 ? 
C3 Th1 C3 122.068(10) 12_566 2_665 ? 
C3 Th1 C3 114.03(3) 3_565 2_665 ? 
C3 Th1 C3 114.03(3) 12_566 11_666 ? 
C3 Th1 C3 122.068(10) 3_565 11_666 ? 
C3 Th1 C3 28.80(7) 2_665 11_666 ? 
C3 Th1 C3 114.03(3) 12_566 10_556 ? 
C3 Th1 C3 122.068(10) 3_565 10_556 ? 
C3 Th1 C3 122.068(10) 2_665 10_556 ? 
C3 Th1 C3 114.03(3) 11_666 10_556 ? 
C3 Th1 C3 122.068(10) 12_566 . ? 
C3 Th1 C3 114.03(3) 3_565 . ? 
C3 Th1 C3 114.03(3) 2_665 . ? 
C3 Th1 C3 122.068(10) 11_666 . ? 
C3 Th1 C3 28.80(7) 10_556 . ? 
C3 Th1 C2 28.84(5) 12_566 12_566 ? 
C3 Th1 C2 47.34(5) 3_565 12_566 ? 
C3 Th1 C2 96.58(5) 2_665 12_566 ? 
C3 Th1 C2 85.20(5) 11_666 12_566 ? 
C3 Th1 C2 131.48(5) 10_556 12_566 ? 
C3 Th1 C2 149.38(5) . 12_566 ? 
C3 Th1 C2 47.34(5) 12_566 3_565 ? 
C3 Th1 C2 28.84(5) 3_565 3_565 ? 
C3 Th1 C2 85.20(5) 2_665 3_565 ? 
C3 Th1 C2 96.58(5) 11_666 3_565 ? 
C3 Th1 C2 149.38(5) 10_556 3_565 ? 
C3 Th1 C2 131.48(5) . 3_565 ? 
C2 Th1 C2 46.99(7) 12_566 3_565 ? 
C3 Th1 C2 149.39(5) 12_566 2_665 ? 
C3 Th1 C2 131.48(5) 3_565 2_665 ? 
C3 Th1 C2 28.84(5) 2_665 2_665 ? 
C3 Th1 C2 47.34(5) 11_666 2_665 ? 
C3 Th1 C2 96.58(5) 10_556 2_665 ? 
C3 Th1 C2 85.20(5) . 2_665 ? 
C2 Th1 C2 125.414(17) 12_566 2_665 ? 
C2 Th1 C2 105.17(4) 3_565 2_665 ? 
C3 Th1 C2 131.48(5) 12_566 11_666 ? 
C3 Th1 C2 149.39(5) 3_565 11_666 ? 
C3 Th1 C2 47.34(5) 2_665 11_666 ? 
C3 Th1 C2 28.84(5) 11_666 11_666 ? 
C3 Th1 C2 85.20(5) 10_556 11_666 ? 
C3 Th1 C2 96.58(5) . 11_666 ? 
C2 Th1 C2 105.17(4) 12_566 11_666 ? 
C2 Th1 C2 125.414(17) 3_565 11_666 ? 
C2 Th1 C2 46.99(7) 2_665 11_666 ? 
C3 Th1 C2 96.58(5) 12_566 . ? 
C3 Th1 C2 85.20(5) 3_565 . ? 
C3 Th1 C2 131.48(5) 2_665 . ? 
C3 Th1 C2 149.38(5) 11_666 . ? 
C3 Th1 C2 47.34(5) 10_556 . ? 
C3 Th1 C2 28.84(5) . . ? 
C2 Th1 C2 125.413(17) 12_566 . ? 
C2 Th1 C2 105.16(4) 3_565 . ? 
C2 Th1 C2 105.16(4) 2_665 . ? 
C2 Th1 C2 125.412(17) 11_666 . ? 
C3 Th1 C2 85.20(5) 12_566 10_556 ? 
C3 Th1 C2 96.58(5) 3_565 10_556 ? 
C3 Th1 C2 149.38(5) 2_665 10_556 ? 
C3 Th1 C2 131.48(5) 11_666 10_556 ? 
C3 Th1 C2 28.83(5) 10_556 10_556 ? 
C3 Th1 C2 47.33(5) . 10_556 ? 
C2 Th1 C2 105.17(4) 12_566 10_556 ? 
C2 Th1 C2 125.413(17) 3_565 10_556 ? 
C2 Th1 C2 125.411(17) 2_665 10_556 ? 
C2 Th1 C2 105.16(4) 11_666 10_556 ? 
C2 Th1 C2 46.99(7) . 10_556 ? 
C3 Th1 C1 46.71(5) 12_566 3_565 ? 
C3 Th1 C1 46.71(5) 3_565 3_565 ? 
C3 Th1 C1 75.55(6) 2_665 3_565 ? 
C3 Th1 C1 75.55(6) 11_666 3_565 ? 
C3 Th1 C1 159.27(5) 10_556 3_565 ? 
C3 Th1 C1 159.27(5) . 3_565 ? 
C2 Th1 C1 28.13(4) 12_566 3_565 ? 
C2 Th1 C1 28.13(4) 3_565 3_565 ? 
C2 Th1 C1 102.89(5) 2_665 3_565 ? 
C2 Th1 C1 102.89(5) 11_666 3_565 ? 
C2 Th1 C1 131.21(5) . 3_565 ? 
C2 Th1 C1 131.21(5) 10_556 3_565 ? 
C3 Th1 C1 159.27(5) 12_566 2_665 ? 
C3 Th1 C1 159.27(5) 3_565 2_665 ? 
C3 Th1 C1 46.71(5) 2_665 2_665 ? 
C3 Th1 C1 46.71(5) 11_666 2_665 ? 
C3 Th1 C1 75.55(6) 10_556 2_665 ? 
C3 Th1 C1 75.55(6) . 2_665 ? 
C2 Th1 C1 131.21(5) 12_566 2_665 ? 
C2 Th1 C1 131.21(5) 3_565 2_665 ? 
C2 Th1 C1 28.13(4) 2_665 2_665 ? 
C2 Th1 C1 28.13(4) 11_666 2_665 ? 
C2 Th1 C1 102.89(5) . 2_665 ? 
C2 Th1 C1 102.89(5) 10_556 2_665 ? 
C1 Th1 C1 120.0 3_565 2_665 ? 
C3 Th1 C1 75.55(6) 12_566 . ? 
C3 Th1 C1 75.55(6) 3_565 . ? 
C3 Th1 C1 159.27(5) 2_665 . ? 
C3 Th1 C1 159.27(5) 11_666 . ? 
C3 Th1 C1 46.71(5) 10_556 . ? 
C3 Th1 C1 46.71(5) . . ? 
C2 Th1 C1 102.89(5) 12_566 . ? 
C2 Th1 C1 102.89(5) 3_565 . ? 
C2 Th1 C1 131.21(5) 2_665 . ? 
C2 Th1 C1 131.21(5) 11_666 . ? 
C2 Th1 C1 28.13(4) . . ? 
C2 Th1 C1 28.13(4) 10_556 . ? 
C1 Th1 C1 120.0 3_565 . ? 
C1 Th1 C1 120.0 2_665 . ? 
C2 C1 C2 108.0(2) 10_556 . ? 
C2 C1 C4 124.49(11) 10_556 . ? 
C2 C1 C4 124.49(11) . . ? 
C2 C1 Th1 73.05(11) 10_556 . ? 
C2 C1 Th1 73.05(11) . . ? 
C4 C1 Th1 135.31(17) . . ? 
C1 C2 C3 108.16(15) . . ? 
C1 C2 C5 126.2(2) . . ? 
C3 C2 C5 123.93(19) . . ? 
C1 C2 Th1 78.83(11) . . ? 
C3 C2 Th1 74.98(9) . . ? 
C5 C2 Th1 124.45(15) . . ? 
C3 C3 C2 107.74(10) 10_556 . ? 
C3 C3 C6 128.49(12) 10_556 . ? 
C2 C3 C6 122.36(17) . . ? 
C3 C3 Th1 75.60(3) 10_556 . ? 
C2 C3 Th1 76.18(9) . . ? 
C6 C3 Th1 124.94(11) . . ? 
  
_refine_diff_density_max    0.568 
_refine_diff_density_min   -0.373 
_refine_diff_density_rms    0.072 
  
_shelxl_version_number 2014-2 
  
_shelx_res_file 
; 
TITL rrl25 in P6(3)/m 
CELL 0.71073  10.01660  10.01660  15.41760  90.0000  90.0000 120.0000 
ZERR    2.00   0.00210   0.00210   0.00320   0.0000   0.0000   0.0000 
LATT  1 
SYMM -Y, X-Y, Z 
SYMM -X+Y, -X, Z 
SYMM -X, -Y, 0.5+Z 
SYMM Y, -X+Y, 0.5+Z 
SYMM X-Y, X, 0.5+Z 
SFAC C H TH 
UNIT 60 90 2 
TEMP -185.000 
SIZE 0.058 0.176 0.27 
  
rem metal coords from slg6 (SM analogue) 
rem APEX2 2014.1-1, SAINT 8.34a, SADABS 2012/1, SHELXTL 2014/2 
  
eadp H4A H4B H5A H5B H5C H6A H6B H6C 
  
rem shel 100 0.75 
  
conn 15 TH1 
  
l.s. 10 
acta 
  
fmap 2 
plan 10 
  
WGHT    0.019900    0.390800 
FVAR       0.10760 
TH1   3    0.333333    0.666667    0.250000    10.16667    0.00830    0.00830 = 
         0.03248    0.00000    0.00000    0.00415 
C1    1    0.139303    0.329383    0.250000    10.50000    0.01455    0.01073 = 
         0.04679    0.00000    0.00000    0.00726 
C2    1    0.234547    0.369447    0.324045    11.00000    0.02536    0.02000 = 
         0.02965    0.00806    0.00712    0.01568 
C3    1    0.388344    0.422918    0.295941    11.00000    0.01881    0.01303 = 
         0.02788   -0.00148   -0.00362    0.01012 
C4    1   -0.031279    0.217142    0.250000    10.50000    0.01493    0.01475 = 
         0.12143    0.00000    0.00000    0.00443 
C5    1    0.181215    0.326002    0.416139    11.00000    0.08304    0.07333 = 
         0.04181    0.03158    0.03156    0.06343 
C6    1    0.512461    0.438259    0.356482    11.00000    0.03896    0.02403 = 
         0.05325   -0.00668   -0.02469    0.01978 
H4A   2   -0.041810    0.120202    0.250000    10.50000    0.07475 
H4B   2   -0.078015    0.218613    0.302795    11.00000    0.07475 
H5A   2    0.178577    0.229575    0.430846    11.00000    0.07475 
H5B   2    0.084545    0.313345    0.422362    11.00000    0.07475 
H5C   2    0.242839    0.404971    0.451545    11.00000    0.07475 
H6A   2    0.552546    0.523313    0.395903    11.00000    0.07475 
H6B   2    0.476219    0.344458    0.392156    11.00000    0.07475 
H6C   2    0.600918    0.449863    0.322949    11.00000    0.07475 
HKLF 4 
  
REM  rrl25 in P6(3)/m 
REM R1 =  0.0130 for    1131 Fo > 4sig(Fo)  and  0.0146 for all    1217 data 
REM     75 parameters refined using      0 restraints 
  
END 
  
WGHT      0.0198      0.3970 
  
REM Highest difference peak  0.568,  deepest hole -0.373,  1-sigma level  0.072 
Q1    1   0.2819  0.6729  0.2915  11.00000  0.05    0.57 
Q2    1   0.3333  0.6667  0.3178  10.33333  0.05    0.57 
Q3    1   0.4079  0.4305  0.2500  10.50000  0.05    0.50 
Q4    1   0.1817  0.3450  0.2878  11.00000  0.05    0.48 
Q5    1   0.3158  0.4016  0.3138  11.00000  0.05    0.41 
Q6    1   0.3333  0.6667  0.4451  10.33333  0.05    0.36 
Q7    1  -0.0906  0.2420  0.2500  10.50000  0.05    0.36 
Q8    1   0.4421  0.4158  0.3238  11.00000  0.05    0.31 
Q9    1   0.1774  0.4032  0.4379  11.00000  0.05    0.27 
Q10   1   0.3333  0.6667  0.3885  10.33333  0.05    0.25 
; 
_shelx_res_checksum   41222 
  
_shelx_hkl_file 
; 
  -1   1   0   86.89    2.21 
   0   1   0   88.34    2.21 
  -1   1   0   87.94    2.07 
   0   1   0   92.24    2.08 
   1  -1   0   88.07    2.32 
   1  -1   0   87.98    2.15 
   1   0   0   86.26    2.34 
   1   0   0   88.56    2.18 
  -1   0   0   89.81    2.22 
   0  -1   0   89.71    2.17 
   0   1   0   91.24    2.34 
   2  -1   0   31.98    0.87 
  -1  -1   0   33.80    0.90 
   1   1   0   32.37    0.90 
   1  -2   0   32.66    0.86 
   1  -2   0   31.82    0.98 
   2  -1   0   33.82    1.00 
  -1   2   0   32.73    0.90 
   1   1   0   33.42    0.82 
   1   1   0   32.26    1.03 
  -2   1   0   32.85    0.82 
  -2   2   0   60.62    1.62 
   0   2   0   63.73    1.62 
  -2   2   0   62.01    1.52 
   2   0   0   59.20    1.78 
   2   0   0   62.33    1.61 
   0   2   0   63.47    1.53 
  -2   0   0   62.43    1.63 
   2  -2   0   63.21    1.55 
   0  -2   0   62.23    1.59 
   2  -2   0   63.56    1.74 
   1   2   0  135.96    3.72 
   3  -1   0  136.38    3.40 
   3  -1   0  133.19    3.69 
   1   2   0  137.48    3.43 
  -3   1   0  138.65    3.17 
   2  -3   0  143.01    3.69 
  -1  -2   0  140.04    3.45 
   2  -3   0  137.72    3.38 
  -2   3   0  133.75    3.27 
   1   2   0  136.99    3.23 
  -2   3   0  139.10    3.46 
  -3   1   0  133.68    3.49 
   2   1   0   19.20    0.76 
   2   1   0   19.57    0.63 
   3  -2   0   20.45    0.57 
  -3   2   0   19.29    0.55 
  -1   3   0   19.71    0.63 
   3  -2   0   19.44    0.70 
  -1   3   0   19.61    0.60 
   1  -3   0   20.47    0.58 
  -2  -1   0   20.38    0.62 
   1  -3   0   19.13    0.70 
  -3   2   0   19.72    0.63 
   2   1   0   19.99    0.51 
   0   3   0  146.78    3.93 
   3  -3   0  145.67    3.91 
   3   0   0  141.12    3.98 
   0  -3   0  144.68    3.61 
   0   3   0  145.42    3.66 
  -3   3   0  144.44    3.46 
   0   3   0  145.49    3.46 
  -3   0   0  144.48    3.70 
  -3   3   0  143.14    3.69 
   3   0   0  143.13    3.63 
   3  -3   0  149.97    3.55 
   4  -1   0   98.29    2.51 
  -3   4   0   94.57    2.41 
   4  -1   0   96.30    2.79 
  -3   4   0   85.72    2.52 
   3  -4   0   95.24    2.73 
   1   3   0  101.11    2.80 
   1   3   0   98.79    2.37 
  -4   1   0   98.26    2.58 
  -1  -3   0  101.24    2.52 
   3  -4   0  100.40    2.43 
   4  -2   0  559.79   14.58 
   2  -4   0  576.33   13.61 
  -2   4   0  560.85   13.87 
  -2  -2   0  581.05   13.88 
   2  -4   0  555.91   14.55 
  -4   2   0  550.43   13.92 
  -4   2   0  574.82   12.98 
  -2   4   0  555.82   13.08 
   2   2   0  561.13   14.64 
   2   2   0  584.51   12.99 
   4  -2   0  553.95   13.63 
   2   2   0  571.39   13.71 
  -1   4   0    6.87    0.38 
  -4   3   0    7.75    0.37 
  -4   3   0    7.66    0.32 
   4  -3   0    8.15    0.44 
   3   1   0    9.12    0.52 
   1  -4   0    7.84    0.33 
  -1   4   0    6.89    0.42 
   3   1   0    8.58    0.39 
   4  -3   0    8.57    0.31 
  -1   4   0    7.84    0.36 
  -3  -1   0    8.52    0.37 
   0   4   0   84.80    2.47 
  -4   4   0   80.76    2.11 
   4   0   0   84.31    2.24 
   4  -4   0   84.72    2.12 
  -4   4   0   84.45    2.27 
  -4   0   0   82.68    2.28 
   0   4   0   87.42    2.23 
   4  -4   0   84.41    2.46 
   0   4   0   84.75    2.13 
   4   0   0   84.60    2.55 
   4  -5   0  178.14    4.21 
  -4   5   0  165.33    4.15 
  -5   1   0  169.56    4.44 
   4  -5   0  170.20    4.70 
  -1  -4   0  171.94    4.35 
  -1  -4   0  174.87    4.35 
   1   4   0  172.06    4.11 
   5  -1   0  168.03    4.33 
   1   4   0  175.29    4.75 
   5  -1   0  164.77    4.76 
  -5   2   0   41.81    1.32 
   3  -5   0   42.66    1.44 
  -3   5   0   42.64    1.24 
   5  -2   0   43.52    1.48 
  -2  -3   0   44.82    1.26 
   2   3   0   44.35    1.16 
   5  -2   0   44.14    1.25 
   2   3   0   44.98    1.51 
   2   3   0   44.21    1.30 
  -5   2   0   45.84    1.10 
  -3   5   0   43.54    1.28 
   3  -5   0   43.85    1.22 
  -5   3   0   45.27    1.36 
   5  -3   0   45.42    1.25 
  -2   5   0   44.27    1.28 
   3   2   0   45.40    1.14 
   3   2   0   44.55    1.34 
   3   2   0   45.55    1.57 
   5  -3   0   46.33    1.51 
  -5   3   0   45.19    1.18 
  -2   5   0   47.17    1.35 
   2  -5   0   45.30    1.24 
  -3  -2   0   45.74    1.32 
   2  -5   0   44.44    1.48 
  -4  -1   0  141.90    3.61 
  -5   4   0  139.20    3.34 
  -1   5   0  137.03    3.40 
   1  -5   0  135.91    3.49 
  -5   4   0  136.29    3.61 
  -1   5   0  137.39    3.87 
   5  -4   0  143.54    3.43 
   4   1   0  136.15    3.57 
  -1   5   0  134.20    3.61 
   5  -4   0  134.03    3.86 
  -5   5   0   14.24    0.57 
   5  -5   0   13.79    0.70 
  -5   0   0   15.40    0.64 
   5   0   0   14.71    0.62 
   0   5   0   17.38    0.80 
   0   5   0   15.18    0.56 
   5  -5   0   15.62    0.49 
  -5   5   0   14.34    0.61 
   0  -5   0   15.64    0.60 
   0   5   0   15.30    0.58 
   5   0   0   16.70    0.83 
   5  -6   0   18.70    0.87 
  -1  -5   0   19.56    0.69 
  -5   6   0   20.01    0.73 
   1   5   0   20.64    0.91 
   6  -1   0   19.32    0.74 
   6  -1   0   20.27    0.98 
  -5   6   0   18.79    0.74 
   1   5   0   19.08    0.69 
  -1  -5   0   19.79    0.75 
  -6   1   0   20.26    0.79 
   5  -6   0   19.30    0.59 
   2   4   0   86.19    2.63 
   6  -2   0   82.23    2.62 
   6  -2   0   83.83    2.28 
   4  -6   0   84.31    2.58 
   4  -6   0   87.20    2.21 
  -2  -4   0   84.73    2.33 
   2   4   0   85.51    2.14 
  -2  -4   0   84.94    2.29 
  -4   6   0   84.45    2.32 
  -4   6   0   84.12    2.24 
  -6   2   0   83.66    2.39 
   6  -3   0   97.84    2.57 
   6  -3   0   97.29    2.94 
  -3   6   0   98.71    2.67 
  -3   6   0   95.51    2.55 
   3   3   0   97.52    2.67 
   3   3   0   98.01    2.40 
  -6   3   0   97.40    2.72 
   3   3   0   97.56    2.99 
  -6   3   0  100.90    2.39 
   3  -6   0   95.50    2.91 
   3  -6   0  105.11    2.56 
  -3  -3   0   97.83    2.64 
  -2   6   0   74.12    2.17 
   4   2   0   73.58    2.12 
   2  -6   0   78.12    2.35 
   6  -4   0   75.32    1.98 
   4   2   0   77.66    2.47 
   4   2   0   75.01    1.81 
  -6   4   0   75.14    1.91 
  -2   6   0   75.67    2.03 
   6  -4   0   74.03    2.35 
   2  -6   0   74.50    2.00 
  -6   4   0   75.74    2.15 
  -4  -2   0   74.91    2.11 
   5   1   0   16.69    0.92 
  -6   5   0   17.72    0.73 
   5   1   0   18.39    0.73 
  -1   6   0   16.86    0.68 
  -5  -1   0   17.30    0.70 
   1  -6   0   18.33    0.66 
  -6   5   0   18.22    0.65 
  -1   6   0   16.72    0.83 
   6  -5   0   18.55    0.58 
  -1   6   0   17.97    0.68 
   6  -5   0   17.37    0.83 
   0   6   0  131.71    3.89 
   0   6   0  137.65    3.49 
  -6   0   0  136.06    3.61 
  -6   6   0  131.04    3.35 
   6  -6   0  135.77    3.90 
   0   6   0  133.97    3.34 
   6   0   0  129.18    4.00 
   0  -6   0  134.88    3.50 
  -6   6   0  132.29    3.59 
   6   0   0  131.01    3.54 
   1   6   0   22.26    1.04 
  -6   7   0   22.47    0.87 
   6  -7   0   20.67    1.00 
  -1  -6   0   22.74    0.79 
   1   6   0   22.63    0.80 
  -1  -6   0   21.47    0.86 
  -7   1   0   22.34    0.91 
   7  -1   0   21.54    0.86 
   7  -1   0   22.24    1.13 
  -6   7   0   21.63    0.84 
   2   5   0  133.96    3.29 
   7  -2   0  128.47    3.96 
  -2  -5   0  131.97    3.54 
   2   5   0  135.11    3.93 
   7  -2   0  134.72    3.50 
  -5   7   0  129.58    3.38 
  -2  -5   0  135.82    3.49 
  -7   2   0  132.24    3.62 
   5  -7   0  130.07    3.87 
  -5   7   0  131.46    3.54 
  -7   3   0   51.94    1.69 
   3   4   0   54.26    1.45 
  -4   7   0   54.66    1.64 
   3   4   0   56.69    1.95 
   4  -7   0   53.50    1.85 
  -4   7   0   54.81    1.60 
   7  -3   0   55.16    1.59 
   7  -3   0   54.77    1.93 
  -3  -4   0   53.37    1.67 
  -3  -4   0   56.05    1.60 
   4   3   0   12.44    0.76 
  -7   4   0   11.99    0.61 
   3  -7   0   11.50    0.49 
   7  -4   0   13.42    0.75 
   3  -7   0   12.20    0.70 
  -3   7   0   11.68    0.61 
   7  -4   0   12.40    0.51 
  -4  -3   0   11.68    0.54 
  -7   4   0   11.58    0.45 
  -3   7   0   11.16    0.57 
   4   3   0   11.22    0.59 
   5   2   0  134.34    4.04 
   2  -7   0  132.37    3.44 
  -7   5   0  133.61    3.62 
   2  -7   0  132.29    3.90 
  -7   5   0  131.38    3.28 
   7  -5   0  132.30    3.92 
  -2   7   0  134.04    3.41 
  -5  -2   0  134.04    3.58 
   5   2   0  130.56    3.57 
   7  -5   0  134.18    3.38 
  -2   7   0  133.68    3.61 
   1  -7   0   49.96    1.76 
   6   1   0   49.59    1.88 
  -7   6   0   48.62    1.40 
   1  -7   0   48.59    1.45 
   7  -6   0   47.51    1.75 
   6   1   0   44.23    1.51 
  -7   6   0   48.48    1.54 
  -6  -1   0   47.90    1.52 
  -1   7   0   45.80    1.43 
  -7   7   0   25.99    1.01 
   7   0   0   26.83    1.31 
   0  -7   0   25.08    0.96 
  -7   7   0   26.49    0.94 
   7   0   0   26.85    1.02 
   7  -7   0   26.16    1.19 
   0   7   0   26.61    1.20 
  -7   0   0   26.14    1.03 
   0   7   0   27.84    0.97 
   8  -1   0   48.01    1.98 
  -8   1   0   48.86    1.65 
   8  -1   0   48.40    1.59 
   1   7   0   49.58    1.48 
   1   7   0   50.83    1.92 
  -7   8   0   47.51    1.52 
  -1  -7   0   48.12    1.58 
   7  -8   0   48.39    1.85 
  -7   8   0   50.35    1.62 
   8  -2   0   38.21    1.67 
   8  -2   0   39.15    1.32 
  -6   8   0   37.50    1.28 
  -8   2   0   40.16    1.41 
   6  -8   0   39.20    1.56 
   2   6   0   41.22    1.60 
  -6   8   0   38.77    1.33 
   2   6   0   41.14    1.22 
   8  -3   0   16.90    0.98 
   8  -3   0   16.78    0.71 
  -3  -5   0   16.54    0.77 
  -3  -5   0   16.53    0.68 
  -5   8   0   16.15    0.73 
   3   5   0   17.27    0.96 
   5  -8   0   17.16    0.91 
  -8   3   0   15.97    0.79 
  -4  -4   0  127.46    3.39 
  -8   4   0  124.72    3.50 
  -4   8   0  130.37    3.47 
   8  -4   0  124.62    3.82 
   8  -4   0  126.24    3.30 
   4   4   0  130.76    3.88 
   4  -8   0  123.10    3.75 
  -4  -4   0  122.87    3.44 
  -4   8   0  118.79    3.27 
   3  -8   0    5.30    0.53 
   5   3   0    4.63    0.56 
  -3   8   0    6.04    0.45 
   5   3   0    5.31    0.45 
  -8   5   0    5.40    0.48 
   8  -5   0    6.29    0.60 
  -5  -3   0    5.12    0.39 
   8  -5   0    4.25    0.33 
   6   2   0   67.23    2.43 
  -8   6   0   67.72    1.84 
   8  -6   0   69.21    2.34 
   6   2   0   66.07    2.05 
  -8   6   0   68.70    2.08 
  -6  -2   0   67.33    2.03 
  -2   8   0   66.95    1.95 
   2  -8   0   64.53    2.27 
   2  -8   0   65.03    1.91 
   8  -7   0  159.36    4.73 
   1  -8   0  154.68    4.18 
  -8   7   0  156.97    4.34 
   7   1   0  154.86    4.29 
  -8   7   0  159.15    4.01 
  -7  -1   0  161.92    4.34 
  -1   8   0  161.12    4.09 
   1  -8   0  164.76    4.73 
   7   1   0  165.81    4.91 
   0   8   0   17.87    0.80 
   8   0   0   18.06    0.86 
   8   0   0   18.71    1.17 
   0  -8   0   19.29    0.82 
   8  -8   0   17.13    1.02 
   0   8   0   18.87    1.04 
  -8   0   0   17.78    0.87 
  -8   8   0   17.75    0.87 
  -8   8   0   16.92    0.77 
  -8   9   0   15.54    0.80 
   9  -1   0   13.41    1.06 
  -8   9   0   14.33    0.77 
   8  -9   0   16.20    1.00 
  -1  -8   0   14.24    0.76 
   1   8   0   15.15    0.97 
   9  -1   0   15.38    0.80 
   1   8   0   13.86    0.72 
  -9   1   0   14.30    0.81 
  -2  -7   0   26.08    1.06 
  -9   2   0   24.99    1.10 
   9  -2   0   26.69    1.40 
  -7   9   0   24.41    1.03 
   2   7   0   26.06    1.27 
   9  -2   0   24.69    1.02 
   7  -9   0   24.36    1.22 
  -7   9   0   25.39    1.05 
  -6   9   0  115.78    3.24 
   3   6   0  120.46    3.77 
  -3  -6   0  125.47    3.41 
   9  -3   0  118.73    3.30 
   6  -9   0  119.87    3.75 
  -9   3   0  119.54    3.47 
   9  -3   0  123.11    3.90 
  -6   9   0  124.06    3.46 
  -9   4   0   11.28    0.69 
   5  -9   0   11.25    0.79 
   4   5   0   10.24    0.80 
   9  -4   0   11.93    0.87 
  -5   9   0   10.88    0.65 
  -4  -5   0   11.45    0.67 
   9  -4   0   10.32    0.56 
  -4  -5   0   11.44    0.58 
   9  -5   0   38.34    1.66 
   4  -9   0   37.95    1.59 
  -5  -4   0   38.74    1.40 
  -5  -4   0   38.91    1.31 
  -9   5   0   39.03    1.44 
  -4   9   0   39.53    1.36 
   5   4   0   40.03    1.68 
  -9   6   0   60.40    1.99 
  -6  -3   0   59.27    1.89 
   3  -9   0   63.11    2.23 
   6   3   0   63.74    2.37 
   6   3   0   59.91    1.97 
   9  -6   0   61.33    2.27 
  -3   9   0   62.69    1.89 
  -9   7   0   32.48    1.29 
   9  -7   0   32.86    1.51 
  -7  -2   0   32.70    1.24 
   2  -9   0   34.23    1.48 
   7   2   0   32.22    1.28 
   7   2   0   35.03    1.63 
  -2   9   0   34.16    1.23 
  -9   8   0   14.68    0.72 
  -8  -1   0   14.07    0.79 
   8   1   0   14.50    1.07 
   1  -9   0   15.41    0.95 
  -1   9   0   14.61    0.77 
  -9   8   0   15.02    0.82 
   9  -8   0   13.58    0.96 
   8   1   0   15.76    0.83 
  -9   9   0   68.65    2.08 
  -9   9   0   69.24    2.25 
   9   0   0   70.81    2.24 
  -9   0   0   68.54    2.26 
   0   9   0   70.08    2.11 
   0   9   0   72.89    2.58 
   0  -9   0   69.60    2.16 
   9  -9   0   72.03    2.59 
  -1  -9   0   24.13    1.07 
 -10   1   0   23.91    1.16 
  10  -1   0   23.98    1.49 
  -9  10   0   25.34    1.09 
   9 -10   0   23.93    1.36 
  10  -1   0   24.50    1.11 
  -9  10   0   25.05    1.12 
   1   9   0   24.29    1.31 
  10  -2   0   77.72    2.39 
  10  -2   0   76.85    2.96 
  -8  10   0   76.38    2.32 
 -10   2   0   77.57    2.50 
  -2  -8   0   77.91    2.42 
   2   8   0   79.15    2.84 
   8 -10   0   78.84    2.79 
   3   7   0   21.46    1.18 
  -7  10   0   20.66    0.97 
  10  -3   0   19.97    0.91 
  10  -3   0   22.32    1.34 
  -3  -7   0   20.26    0.99 
 -10   3   0   20.20    1.02 
   7 -10   0   19.71    1.13 
  -6  10   0   14.18    0.81 
  10  -4   0   14.88    1.08 
   6 -10   0   14.32    0.94 
   4   6   0   14.87    0.99 
 -10   4   0   14.29    0.85 
  -4  -6   0   14.21    0.81 
  10  -4   0   14.43    0.73 
  -5  10   0   67.29    2.14 
 -10   5   0   71.76    2.31 
   5   5   0   70.95    2.58 
  10  -5   0   68.01    2.61 
  -5  -5   0   72.45    2.26 
   5 -10   0   71.21    2.52 
 -10   6   0   23.21    1.11 
   4 -10   0   24.24    1.26 
   6   4   0   26.43    1.38 
  -4  10   0   23.69    1.07 
  -6  -4   0   24.72    1.01 
  -6  -4   0   24.40    1.09 
  10  -6   0   26.22    1.37 
   3 -10   0    1.90    0.46 
   7   3   0    1.92    0.50 
  -7  -3   0    1.60    0.32 
 -10   7   0    2.16    0.41 
  -7  -3   0    2.61    0.42 
  10  -7   0    1.91    0.50 
  -3  10   0    1.99    0.39 
 -10   8   0   59.22    2.05 
  -8  -2   0   59.48    1.99 
  -2  10   0   61.33    1.94 
   8   2   0   63.46    2.07 
   2 -10   0   63.02    2.31 
  10  -8   0   55.51    2.32 
   8   2   0   61.61    2.48 
  10  -9   0    4.81    0.74 
  -9  -1   0    3.11    0.46 
   9   1   0    5.63    0.85 
   1 -10   0    4.05    0.62 
 -10   9   0    3.67    0.54 
   9   1   0    4.24    0.54 
  -1  10   0    5.25    0.56 
  10 -10   0   22.09    1.39 
   0 -10   0   24.74    1.36 
  10   0   0   22.95    1.52 
 -10   0   0   25.80    1.21 
   0  10   0   25.85    1.11 
 -10  10   0   25.89    1.11 
  10   0   0   24.34    1.18 
 -10  10   0   23.67    1.17 
   1  10   0   59.88    2.35 
 -11   1   0   55.51    2.05 
 -10  11   0   54.90    1.89 
  10 -11   0   53.94    2.34 
  11  -1   0   53.75    2.51 
  11  -1   0   54.91    1.99 
 -11   2   0    6.78    0.70 
   2   9   0    6.87    0.79 
  -9  11   0    7.44    0.70 
   9 -11   0    8.15    0.87 
  11  -2   0    7.50    1.00 
  11  -2   0    6.38    0.65 
  -2  -9   0    7.37    0.64 
  -8  11   0   21.10    1.05 
   3   8   0   20.76    1.25 
  11  -3   0   19.66    1.40 
  11  -3   0   21.57    1.02 
   8 -11   0   21.49    1.27 
  -3  -8   0   20.41    1.03 
 -11   3   0   20.48    1.11 
   4   7   0   51.41    2.12 
  11  -4   0   50.82    2.26 
  -4  -7   0   50.67    1.85 
  -7  11   0   51.83    1.79 
   7 -11   0   51.69    2.12 
 -11   4   0   52.75    1.92 
   5   6   0   33.89    1.64 
 -11   5   0   34.54    1.46 
  -5  -6   0   33.16    1.38 
   6 -11   0   35.19    1.63 
  -6  11   0   31.74    1.33 
  11  -5   0   33.23    1.73 
   6   5   0   20.77    1.28 
   5 -11   0   20.37    1.21 
  -5  11   0   19.67    1.02 
 -11   6   0   21.65    1.10 
  11  -6   0   17.32    1.22 
  -6  -5   0   20.33    1.05 
 -11   7   0   70.58    2.37 
   4 -11   0   71.01    2.61 
   7   4   0   70.90    2.72 
  -7  -4   0   70.13    2.32 
  -4  11   0   71.42    2.23 
  11  -7   0   65.58    2.67 
   3 -11   0   18.49    1.17 
  -8  -3   0   19.22    1.03 
  -8  -3   0   21.83    1.01 
 -11   8   0   20.32    1.07 
   8   3   0   17.80    1.25 
  11  -8   0   18.39    1.26 
  -3  11   0   18.01    0.98 
   9   2   0   21.61    1.41 
  -2  11   0   21.23    1.06 
  -9  -2   0   20.48    1.09 
  -9  -2   0   22.24    1.07 
 -11   9   0   18.89    1.08 
  11  -9   0   21.43    1.36 
   2 -11   0   20.26    1.26 
  10   1   0   49.12    2.31 
 -10  -1   0   49.69    1.84 
  -1  11   0   48.12    1.74 
 -11  10   0   48.36    1.86 
   1 -11   0   49.02    2.10 
 -10  -1   0   51.38    1.88 
  11 -10   0   46.90    2.17 
  11 -11   0   26.45    1.58 
  11   0   0   23.35    1.60 
 -11   0   0   26.18    1.29 
   0 -11   0   23.94    1.43 
 -11   0   0   25.89    1.27 
  12  -1   0   11.85    1.27 
 -12   1   0   11.91    0.93 
  12  -2   0    2.49    0.49 
 -10  12   0    2.90    0.53 
 -12   2   0    2.58    0.55 
   2  10   0    3.08    0.66 
  12  -2   0    3.74    0.85 
  10 -12   0    2.34    0.63 
  12  -3   0   42.42    2.17 
  -3  -9   0   41.64    1.66 
   3   9   0   42.44    1.97 
 -12   3   0   42.09    1.76 
  -9  12   0   42.02    1.64 
   9 -12   0   42.63    1.99 
   8 -12   0   11.71    1.00 
   4   8   0   10.89    0.99 
  -4  -8   0   10.65    0.79 
  -8  12   0    8.11    0.79 
  12  -4   0    8.74    1.13 
 -12   4   0    9.74    0.84 
   7 -12   0   13.11    1.04 
   5   7   0   11.95    1.04 
  -5  -7   0   12.89    0.89 
 -12   5   0   13.29    0.95 
  12  -5   0   11.86    1.15 
  -7  12   0   11.31    0.85 
  12  -6   0   62.31    2.67 
  -6  -6   0   58.35    2.18 
  -6  12   0   65.30    2.16 
   6   6   0   64.36    2.57 
 -12   6   0   70.22    2.36 
   6 -12   0   63.60    2.52 
   5 -12   0    8.86    0.90 
 -12   7   0    8.81    0.81 
   7   5   0    9.67    0.96 
  -7  -5   0    9.64    0.80 
  -5  12   0    7.53    0.78 
  12  -7   0   11.18    1.07 
  12  -8   0   19.27    1.39 
   4 -12   0   21.27    1.32 
 -12   8   0   20.42    1.15 
  -4  12   0   21.71    1.13 
  -8  -4   0   21.36    1.15 
   8   4   0   23.16    1.43 
   9   3   0   48.43    2.25 
  12  -9   0   50.14    2.29 
   3 -12   0   47.59    2.11 
  -3  12   0   47.78    1.79 
  -9  -3   0   47.55    1.86 
 -12   9   0   48.41    1.91 
 -12  10   0    7.48    0.78 
   2 -12   0    7.41    0.88 
 -10  -2   0    8.05    0.80 
  12 -10   0    8.16    1.03 
  -2  12   0    7.42    0.75 
  10   2   0    8.35    1.01 
 -10  -2   0    9.03    0.77 
  -1  12   0    5.17    0.67 
  11   1   0    6.71    0.99 
 -11  -1   0    6.76    0.76 
  -3 -10   0    9.89    0.87 
  -4  -9   0    9.23    0.82 
   4   9   0   11.41    1.16 
  13  -4   0    8.78    1.22 
   5   8   0   46.06    2.10 
  13  -5   0   45.51    2.36 
  -5  -8   0   43.94    1.82 
   6   7   0    4.62    0.81 
  -6  -7   0    5.56    0.73 
   7 -13   0    5.21    0.88 
  13  -6   0    4.91    0.91 
   6 -13   0    9.06    1.02 
  -7  -6   0   12.22    0.96 
  13  -7   0    9.62    1.17 
   7   6   0    9.39    1.01 
 -13   7   0    9.41    0.92 
 -13   8   0   46.20    1.94 
   8   5   0   46.35    2.13 
  13  -8   0   32.90    1.99 
   9   4   0   12.07    1.17 
   0   0  -1   -1.48    0.02 
   0   1  -1  317.50    7.41 
  -1   0  -1  300.36    7.47 
   0   1  -1  291.05    7.59 
   0   1  -1  310.92    7.86 
  -1   1  -1  307.10    7.56 
   0  -1  -1  340.29    7.58 
   1  -1  -1  318.33    7.87 
  -1   1  -1  315.01    7.09 
   0   1  -1  316.28    7.10 
  -1   0  -1  308.76    7.54 
   1   0  -1  300.70    7.87 
  -1   0   1  306.55    7.56 
   1   0   1  299.76    7.11 
  -1   1   1  310.88    7.53 
   0   1   1  302.43    7.90 
  -1   1   1  313.40    7.10 
   0   1   1  308.38    7.09 
   1  -1   1  309.19    7.95 
   1   0   1  306.20    7.91 
  -1   0   1  294.69    7.09 
   2  -1  -1   21.10    0.67 
   1   1  -1   20.97    0.56 
  -1   2  -1   21.08    0.64 
   1   1  -1   20.76    0.61 
   2  -1  -1   20.74    0.61 
   1   1  -1   22.63    0.70 
  -1   2  -1   20.44    0.59 
  -1  -1  -1   23.05    0.60 
  -1  -1  -1   20.47    0.62 
   1   1  -1   20.69    0.63 
   1  -2  -1   22.08    0.61 
   1  -2  -1   20.81    0.69 
  -2   1  -1   22.46    0.55 
  -2   1   1   20.63    0.63 
   1  -2   1   20.83    0.55 
  -1   2   1   21.03    0.58 
  -2   1   1   21.08    0.55 
   1   1   1   20.16    0.74 
   2  -1   1   19.75    0.69 
   1   1   1   21.37    0.55 
  -1   2   1   20.20    0.59 
   1  -2   1   21.86    0.67 
   2  -1   1   21.39    0.58 
   0  -2  -1   28.16    0.77 
   2  -2  -1   27.77    0.76 
  -2   2  -1   28.05    0.74 
   0   2  -1   27.52    0.74 
  -2   2  -1   27.19    0.79 
  -2   0  -1   27.08    0.78 
   2   0  -1   25.94    0.87 
   2   0  -1   26.10    0.77 
   0   2  -1   27.61    0.85 
   0   2  -1   27.19    0.75 
   0   2  -1   27.15    0.83 
   2  -2  -1   28.49    0.86 
  -2   0   1   27.27    0.68 
   2  -2   1   26.93    0.85 
  -2   2   1   27.02    0.77 
   2   0   1   30.87    0.94 
  -2   2   1   27.12    0.73 
   0   2   1   28.05    0.73 
  -2   0   1   27.37    0.80 
   2   0   1   27.17    0.77 
   0   2   1   28.15    0.89 
   2   0   1   26.51    0.66 
  -3   1  -1  117.89    3.15 
   2  -3  -1  125.54    3.10 
  -2   3  -1  122.42    3.15 
   3  -1  -1  121.51    3.09 
  -3   1  -1  123.18    2.87 
   3  -1  -1  122.06    3.34 
  -2   3  -1  121.46    2.97 
   1   2  -1  120.58    3.14 
   1   2  -1  123.40    2.92 
   1   2  -1  123.05    3.09 
  -1  -2  -1  125.45    3.11 
   1   2  -1  126.61    3.35 
  -1  -2  -1  127.99    3.09 
   2  -3  -1  122.02    3.34 
   1   2   1  126.42    3.41 
  -3   1   1  120.74    3.16 
   2  -3   1  119.88    3.32 
  -2   3   1  122.48    2.97 
   1   2   1  123.79    2.92 
  -2   3   1  124.61    3.10 
   3  -1   1  129.62    3.08 
  -3   1   1  122.58    2.87 
   3  -1   1  125.89    3.38 
  -2  -1  -1  484.72   11.73 
   2   1  -1  480.27   11.59 
   1  -3  -1  481.13   11.55 
  -1   3  -1  466.27   11.80 
   3  -2  -1  488.15   12.30 
   3  -2  -1  477.80   11.54 
  -3   2  -1  485.86   11.01 
   2   1  -1  474.17   12.34 
   2   1  -1  503.61   10.97 
   3  -2   1  486.76   11.50 
  -2  -1   1  470.30   11.76 
   2   1   1  461.28   12.40 
   2   1   1  478.93   11.59 
   2   1   1  486.13   10.96 
   1  -3   1  468.19   12.28 
  -3   2   1  471.11   11.01 
  -3   2   1  467.04   11.76 
  -1   3   1  492.55   11.71 
  -1   3   1  479.35   11.06 
   3  -2   1  483.30   12.31 
  -1   3   1  475.57   12.32 
   1  -3   1  474.29   11.51 
  -3   3  -1   20.82    0.68 
   0   3  -1   20.84    0.64 
   3  -3  -1   20.59    0.75 
   3  -3  -1   20.19    0.62 
   3   0  -1   21.25    0.67 
   0   3  -1   21.11    0.70 
   0  -3  -1   21.37    0.66 
  -3   3  -1   20.80    0.63 
   0   3  -1   21.54    0.64 
   0   3  -1   21.19    0.75 
  -3   0  -1   20.64    0.67 
  -3   3   1   20.33    0.66 
   3   0   1   21.44    0.67 
   0   3   1   21.03    0.63 
   3   0   1   20.16    0.82 
  -3   0   1   20.13    0.69 
   3  -3   1   20.85    0.55 
   3  -3   1   21.32    0.76 
   0   3   1   21.73    0.60 
  -3   3   1   19.90    0.62 
  -1  -3  -1  181.70    4.48 
   3  -4  -1  179.22    4.45 
   1   3  -1  183.61    4.48 
  -4   1  -1  176.27    4.56 
  -3   4  -1  177.96    4.55 
   1   3  -1  177.72    4.24 
   1   3  -1  178.32    4.53 
   4  -1  -1  176.60    4.84 
  -1  -3  -1  184.65    4.46 
   3  -4  -1  179.83    4.82 
   1   3  -1  179.88    4.82 
   4  -1  -1  180.02    4.47 
  -3   4  -1  176.22    4.28 
   1   3   1  179.30    4.23 
   4  -1   1  174.94    4.87 
   3  -4   1  179.92    4.81 
  -4   1   1  178.55    4.57 
   1   3   1  179.75    4.89 
  -4   1   1  175.36    4.12 
  -3   4   1  184.10    4.51 
   4  -1   1  178.84    4.45 
  -3   4   1  172.23    4.27 
   4  -2  -1    1.17    0.20 
  -2  -2  -1    1.47    0.15 
  -2   4  -1    1.09    0.16 
   2   2  -1    1.24    0.13 
   2  -4  -1    1.34    0.22 
  -2  -2  -1    1.36    0.19 
   2   2  -1    1.23    0.18 
   2   2  -1    1.31    0.23 
   2  -4  -1    1.21    0.16 
   4  -2  -1    1.28    0.16 
  -4   2  -1    0.92    0.16 
  -4   2  -1    1.18    0.12 
  -2   4  -1    1.20    0.17 
  -2  -2   1    1.19    0.17 
  -4   2   1    0.90    0.16 
   2  -4   1    1.31    0.20 
  -4   2   1    1.15    0.12 
   2   2   1    1.35    0.26 
   2   2   1    1.35    0.13 
   4  -2   1    1.27    0.15 
   2  -4   1    1.36    0.12 
  -2   4   1    1.24    0.15 
   4  -2   1    0.96    0.21 
  -2   4   1    1.18    0.17 
   3   1  -1  269.91    6.69 
   4  -3  -1  280.28    6.62 
  -4   3  -1  276.43    6.33 
  -3  -1  -1  273.30    6.76 
   4  -3  -1  280.54    7.16 
  -1   4  -1  269.86    6.87 
   1  -4  -1  268.62    6.64 
  -4   3  -1  264.54    6.80 
   3   1  -1  275.73    7.21 
  -3  -1   1  274.72    6.80 
   4  -3   1  270.04    7.15 
  -3  -1   1  269.43    6.24 
  -1   4   1  273.01    7.18 
   3   1   1  260.22    7.25 
   3   1   1  275.61    6.69 
  -1   4   1  261.05    6.75 
  -4   3   1  260.73    6.77 
   1  -4   1  272.56    7.13 
  -4   3   1  264.43    6.33 
   4  -3   1  275.84    6.56 
   1  -4   1  276.79    6.61 
  -1   4   1  270.05    6.38 
   4  -4  -1  109.53    3.05 
   0  -4  -1  110.67    2.78 
  -4   0  -1  106.63    2.83 
  -4   4  -1  108.49    2.85 
   0   4  -1  108.70    2.66 
   4  -4  -1  109.22    2.71 
   0   4  -1  106.66    2.83 
  -4   4  -1  109.27    2.66 
   4   0  -1  105.97    2.80 
   0   4  -1  104.28    3.05 
   4   0  -1  106.29    3.10 
   4  -4   1  107.34    2.62 
  -4   4   1  105.82    2.81 
   4   0   1  101.52    3.12 
   0   4   1  110.02    3.09 
   0   4   1  105.38    2.65 
  -4   4   1  106.61    2.65 
  -4   0   1  104.09    2.85 
   0  -4   1  109.12    2.76 
   4   0   1  105.20    2.78 
   4  -4   1  107.13    3.04 
   0   4   1  110.37    2.73 
  -1  -4  -1    0.23    0.09 
   4  -5  -1    0.39    0.12 
   1   4  -1    0.21    0.11 
  -1  -4  -1    0.11    0.12 
  -5   1  -1    0.21    0.13 
   5  -1  -1    0.34    0.13 
  -4   5  -1    0.37    0.14 
   1   4  -1    0.17    0.12 
  -4   5  -1    0.51    0.15 
   5  -1  -1    1.05    0.25 
   1   4  -1    0.27    0.12 
   1   4  -1    0.23    0.15 
   4  -5  -1    0.48    0.18 
   5  -1   1    0.28    0.19 
   1   4   1    0.38    0.12 
  -4   5   1    0.33    0.14 
  -5   1   1    0.11    0.14 
  -4   5   1    0.21    0.11 
   5  -1   1    0.26    0.13 
   1   4   1    0.35    0.20 
   4  -5   1    0.11    0.14 
   2   3  -1  170.37    3.96 
   5  -2  -1  163.56    4.59 
  -3   5  -1  162.69    4.28 
  -2  -3  -1  167.09    4.24 
   5  -2  -1  165.71    4.19 
   2   3  -1  172.57    4.61 
  -5   2  -1  175.02    3.90 
   3  -5  -1  161.80    4.57 
   2   3  -1  163.08    4.23 
  -3   5  -1  161.83    4.05 
  -2  -3  -1  176.59    4.23 
  -5   2  -1  162.74    4.31 
   3  -5  -1  169.36    4.20 
   3  -5   1  164.51    4.56 
  -2  -3   1  168.68    4.27 
  -5   2   1  164.72    3.89 
   2   3   1  168.87    3.95 
  -5   2   1  165.53    4.32 
   2   3   1  163.67    4.66 
  -3   5   1  163.31    4.05 
   5  -2   1  165.20    4.17 
   3  -5   1  168.28    4.10 
   5  -2   1  164.95    4.62 
  -3   5   1  166.49    4.23 
   3   2  -1   92.34    2.75 
   5  -3  -1   93.15    2.40 
   3   2  -1   91.27    2.48 
  -3  -2  -1   97.38    2.46 
  -5   3  -1   93.41    2.26 
   2  -5  -1   92.02    2.40 
   3   2  -1   93.85    2.23 
  -2   5  -1   91.00    2.53 
  -2   5  -1   91.06    2.37 
   2  -5  -1   92.58    2.72 
   5  -3  -1   92.68    2.71 
  -2   5   1   92.53    2.37 
   2  -5   1   91.12    2.34 
  -5   3   1   93.42    2.52 
   5  -3   1   93.10    2.37 
  -5   3   1   91.10    2.26 
   3   2   1   89.96    2.48 
  -2   5   1   96.59    2.46 
   2  -5   1   89.33    2.67 
   3   2   1   93.76    2.22 
   3   2   1   93.81    2.83 
  -3  -2   1   94.21    2.50 
   5  -3   1   90.42    2.71 
  -1   5  -1    9.39    0.44 
   1  -5  -1    9.39    0.42 
   5  -4  -1    9.95    0.39 
  -1   5  -1    8.49    0.48 
  -5   4  -1    9.39    0.40 
  -4  -1  -1    9.93    0.45 
   4   1  -1    9.63    0.47 
   5  -4  -1    9.89    0.55 
  -5   4  -1    9.19    0.46 
   4   1  -1   10.37    0.62 
   5  -4   1   10.56    0.56 
  -1   5   1    9.67    0.44 
  -5   4   1    9.25    0.39 
   4   1   1    9.13    0.63 
   1  -5   1    9.52    0.40 
   4   1   1    9.21    0.46 
  -5   4   1    9.71    0.46 
  -4  -1   1   10.19    0.47 
  -1   5   1    9.68    0.41 
  -1   5   1    9.60    0.55 
   1  -5   1    9.83    0.53 
   5  -4   1    9.85    0.34 
  -5   5  -1  161.22    4.24 
   5  -5  -1  163.97    4.04 
   0  -5  -1  164.19    4.15 
  -5   0  -1  161.03    4.23 
   0   5  -1  162.93    3.97 
   0   5  -1  159.70    4.51 
   5  -5  -1  160.76    4.53 
  -5   5  -1  162.43    3.96 
   5   0  -1  159.02    4.60 
   5   0  -1  163.22    4.18 
   0   5  -1  166.41    4.22 
  -5   0   1  161.79    4.26 
   0  -5   1  168.03    4.14 
  -5   5   1  160.23    3.95 
   5   0   1  163.51    4.17 
   0   5   1  162.04    3.96 
   0   5   1  164.06    4.58 
   5  -5   1  161.81    3.96 
   5   0   1  156.31    4.63 
  -5   5   1  162.44    4.21 
   0   5   1  165.47    4.10 
   5  -5   1  160.18    4.51 
   1   5  -1  107.81    2.69 
   5  -6  -1  109.09    2.71 
   1   5  -1  104.60    3.12 
   5  -6  -1  102.65    3.14 
  -6   1  -1  102.82    2.91 
   6  -1  -1  101.44    3.21 
   6  -1  -1  106.18    2.85 
  -1  -5  -1  111.44    2.77 
   1   5  -1  106.96    2.85 
  -5   6  -1  106.39    2.90 
  -5   6  -1  108.89    2.74 
  -1  -5  -1  105.64    2.85 
  -5   6   1  105.87    2.86 
   6  -1   1  103.71    3.26 
   6  -1   1  104.69    2.83 
  -1  -5   1  111.62    2.85 
   1   5   1  106.27    2.68 
   5  -6   1  104.45    3.14 
  -5   6   1   99.68    2.71 
   1   5   1  104.29    3.19 
  -6   1   1  108.33    2.94 
   6  -2  -1   47.47    1.38 
  -4   6  -1   46.65    1.37 
  -2  -4  -1   46.52    1.42 
   2   4  -1   49.28    1.63 
  -6   2  -1   45.67    1.44 
   6  -2  -1   45.09    1.62 
   2   4  -1   45.07    1.41 
  -4   6  -1   46.20    1.42 
   4  -6  -1   42.85    1.57 
  -2  -4  -1   47.57    1.33 
   4  -6  -1   47.26    1.36 
   2   4  -1   46.72    1.27 
   6  -2   1   46.38    1.66 
   2   4   1   46.28    1.27 
  -4   6   1   47.88    1.38 
  -2  -4   1   47.10    1.39 
   2   4   1   45.32    1.66 
   4  -6   1   45.39    1.57 
   6  -2   1   46.88    1.15 
  -6   2   1   45.48    1.45 
  -6   2   1   48.87    1.15 
   6  -2   1   46.63    1.37 
  -4   6   1   45.60    1.35 
  -6   3  -1    6.94    0.29 
   3   3  -1    6.65    0.40 
   3  -6  -1    6.51    0.35 
  -3  -3  -1    6.39    0.40 
  -3   6  -1    6.02    0.39 
   3   3  -1    6.98    0.51 
  -6   3  -1    5.41    0.39 
   6  -3  -1    6.32    0.35 
  -3  -3  -1    6.50    0.34 
   3  -6  -1    6.65    0.49 
  -3   6  -1    6.07    0.39 
   6  -3  -1    5.67    0.47 
   3  -6   1    6.55    0.46 
  -3  -3   1    5.59    0.35 
   6  -3   1    6.25    0.49 
  -3   6   1    6.66    0.36 
   3  -6   1    6.27    0.30 
  -3   6   1    6.47    0.39 
   3   3   1    6.58    0.29 
  -6   3   1    6.18    0.28 
   6  -3   1    6.95    0.35 
  -6   3   1    6.57    0.42 
   3   3   1    6.25    0.52 
   4   2  -1   38.12    1.41 
  -2   6  -1   36.42    1.13 
  -2   6  -1   36.01    1.25 
   6  -4  -1   37.63    1.35 
   2  -6  -1   36.45    1.34 
   4   2  -1   36.53    1.18 
  -4  -2  -1   36.73    1.14 
  -6   4  -1   35.37    1.02 
   6  -4  -1   36.21    1.07 
  -6   4  -1   35.42    1.19 
   2  -6  -1   36.33    1.09 
   6  -4   1   32.86    1.31 
   4   2   1   36.14    1.18 
   4   2   1   37.30    0.92 
  -6   4   1   35.18    1.02 
   6  -4   1   37.59    1.04 
  -4  -2   1   36.27    1.16 
   4   2   1   36.87    1.45 
  -6   4   1   36.59    1.18 
  -4  -2   1   35.59    0.93 
   2  -6   1   35.07    1.04 
   2  -6   1   36.40    1.30 
  -2   6   1   35.89    1.11 
  -2   6   1   35.10    1.15 
   6  -5  -1  102.38    2.61 
  -1   6  -1  101.18    2.62 
  -5  -1  -1  103.00    2.77 
  -6   5  -1  100.80    2.80 
   5   1  -1  103.15    3.13 
   6  -5  -1  102.02    3.04 
   1  -6  -1  102.09    2.69 
   5   1  -1  102.27    2.76 
  -6   5  -1   98.43    2.55 
  -1   6  -1  103.84    2.80 
   1  -6   1  101.95    2.66 
  -6   5   1   91.35    2.75 
  -1   6   1  101.24    3.06 
   5   1   1   99.20    2.75 
  -5  -1   1  102.40    2.79 
   6  -5   1  103.58    2.55 
  -6   5   1  103.66    2.57 
  -1   6   1  100.15    2.62 
   6  -5   1  100.45    3.03 
  -1   6   1  101.22    2.66 
   5   1   1   97.90    3.16 
   1  -6   1  102.19    3.01 
  -6   6  -1    0.12    0.15 
   0   6  -1    0.19    0.17 
  -6   6  -1    0.14    0.14 
   0  -6  -1   -0.04    0.12 
   6  -6  -1    0.07    0.10 
  -6   0  -1    0.15    0.15 
   6   0  -1   -0.26    0.19 
   6  -6  -1   -0.03    0.15 
   0   6  -1    0.17    0.12 
   6   0  -1    0.16    0.15 
   0   6  -1    0.02    0.13 
   0   6   1    0.01    0.14 
   0  -6   1   -0.02    0.12 
  -6   6   1    0.23    0.14 
   6   0   1    0.09    0.14 
   6  -6   1    0.27    0.18 
  -6   0   1   -0.06    0.13 
  -6   6   1    0.00    0.14 
   0   6   1    0.07    0.15 
   6   0   1    0.19    0.22 
   0   6   1    0.11    0.10 
   1   6  -1   80.78    2.65 
   6  -7  -1   87.40    2.72 
  -7   1  -1   82.04    2.45 
  -6   7  -1   84.70    2.44 
   7  -1  -1   81.63    2.78 
   1   6  -1   85.22    2.25 
  -1  -6  -1   85.36    2.41 
  -6   7  -1   84.91    2.30 
   7  -1  -1   84.14    2.40 
  -1  -6   1   88.72    2.40 
   7  -1   1   84.36    2.39 
   1   6   1   86.16    2.74 
   6  -7   1   84.87    2.69 
   1   6   1   83.95    2.25 
  -6   7   1   85.61    2.41 
  -6   7   1   83.73    2.29 
   7  -1   1   84.61    2.83 
   5  -7  -1    2.22    0.37 
  -7   2  -1    1.73    0.28 
   7  -2  -1    1.80    0.26 
  -2  -5  -1    1.85    0.21 
  -5   7  -1    1.58    0.25 
  -5   7  -1    1.73    0.26 
   2   5  -1    1.72    0.33 
   2   5  -1    1.42    0.21 
  -2  -5  -1    1.66    0.27 
   7  -2  -1    1.80    0.37 
  -7   2   1    1.45    0.27 
  -2  -5   1    1.37    0.25 
   7  -2   1    1.52    0.25 
   2   5   1    1.73    0.36 
  -5   7   1    1.98    0.27 
  -2  -5   1    1.86    0.25 
   2   5   1    1.75    0.24 
   5  -7   1    1.82    0.32 
   7  -2   1    1.97    0.38 
  -5   7   1    1.88    0.26 
  -7   3  -1  108.15    3.05 
   3   4  -1  111.90    3.31 
   4  -7  -1   94.39    2.89 
  -3  -4  -1  113.03    2.92 
   7  -3  -1  109.45    2.91 
   4  -7  -1  109.01    3.28 
   3   4  -1  110.62    2.72 
   7  -3  -1  111.30    3.35 
  -3  -4  -1  111.77    3.01 
  -4   7  -1  112.81    3.03 
   3   4  -1  111.39    3.01 
  -4   7  -1  107.96    2.87 
  -3  -4   1  106.59    2.96 
  -7   3   1  110.08    3.06 
  -4   7   1  111.60    2.95 
   3   4   1  113.46    3.40 
  -4   7   1  108.17    2.86 
   4  -7   1  109.86    3.27 
   7  -3   1  112.62    2.90 
   3   4   1  109.11    2.71 
  -4  -3  -1  141.33    3.70 
   4   3  -1  135.10    3.74 
  -3   7  -1  136.78    3.58 
   4   3  -1  143.62    4.14 
   3  -7  -1  140.32    4.10 
  -7   4  -1  137.70    3.82 
   7  -4  -1  140.39    4.11 
   3  -7  -1  142.36    3.64 
  -3   7  -1  165.95    3.87 
   7  -4  -1  137.70    3.62 
  -7   4  -1  143.63    3.41 
  -4  -3  -1  138.05    3.74 
   3  -7   1  143.15    4.06 
  -3   7   1  141.80    3.75 
   7  -4   1  139.86    3.59 
   3  -7   1  140.50    3.56 
  -3   7   1  134.71    3.56 
  -7   4   1  140.45    3.40 
   7  -4   1  140.57    4.12 
  -4  -3   1  140.28    3.74 
  -7   4   1  134.66    3.78 
   4   3   1  135.34    4.19 
   2  -7  -1    0.09    0.17 
  -7   5  -1    0.12    0.15 
   5   2  -1    0.15    0.22 
  -2   7  -1    0.12    0.17 
   7  -5  -1    0.15    0.12 
  -2   7  -1   -0.05    0.16 
   7  -5  -1    0.27    0.22 
  -5  -2  -1    0.03    0.13 
   5   2  -1    0.08    0.15 
  -7   5  -1    0.11    0.12 
   2  -7  -1    0.09    0.12 
   2  -7   1    0.09    0.17 
  -7   5   1   -0.02    0.12 
   2  -7   1    0.10    0.11 
  -2   7   1    0.12    0.16 
  -7   5   1    0.06    0.15 
  -5  -2   1   -0.06    0.13 
   7  -5   1    0.39    0.11 
   5   2   1    0.09    0.15 
   7  -5   1    0.07    0.19 
   5   2   1   -0.15    0.22 
  -6  -1  -1  127.64    3.60 
  -7   6  -1  131.60    3.35 
   6   1  -1  129.22    3.59 
   6   1  -1  139.24    4.08 
  -1   7  -1  135.81    3.59 
   7  -6  -1  137.23    3.97 
   1  -7  -1  133.31    3.52 
  -7   6  -1  131.98    3.65 
  -1   7  -1  134.50    3.43 
  -1   7   1  135.35    3.43 
   1  -7   1  130.25    3.47 
   7  -6   1  133.28    3.95 
   6   1   1  133.11    3.60 
   1  -7   1  133.88    3.91 
  -1   7   1  133.71    3.97 
   6   1   1  136.53    4.13 
  -6  -1   1  132.06    3.64 
  -7   6   1  133.68    3.63 
  -7   6   1  133.85    3.36 
   0   7  -1   63.60    2.15 
  -7   7  -1   58.50    1.93 
   7  -7  -1   68.82    2.25 
   0   7  -1   64.47    1.82 
  -7   7  -1   62.47    1.80 
   0  -7  -1   69.51    1.91 
   7   0  -1   61.83    1.93 
  -7   0  -1   66.48    1.95 
   7   0  -1   63.34    2.29 
   0   7   1   62.56    2.20 
   7  -7   1   62.13    2.17 
  -7   7   1   63.25    1.92 
   7   0   1   62.09    1.92 
  -7   0   1   62.54    1.97 
   0   7   1   62.70    1.82 
  -7   7   1   60.17    1.79 
   7   0   1   58.46    2.29 
   0  -7   1   64.56    1.87 
   7  -8  -1    1.95    0.39 
  -7   8  -1    1.40    0.28 
   1   7  -1    1.40    0.35 
  -8   1  -1    2.02    0.35 
   8  -1  -1    2.05    0.46 
   1   7  -1    2.18    0.30 
  -1  -7  -1    1.89    0.30 
  -7   8  -1    1.96    0.33 
   8  -1  -1    1.98    0.34 
   8  -1   1    1.82    0.48 
   1   7   1    1.77    0.38 
  -1  -7   1    1.99    0.32 
   1   7   1    2.12    0.31 
  -7   8   1    1.45    0.28 
   7  -8   1    2.13    0.39 
  -8   1   1    1.95    0.33 
  -7   8   1    2.12    0.32 
   8  -1   1    1.51    0.30 
   8  -2  -1   87.46    2.96 
  -6   8  -1   90.08    2.59 
   8  -2  -1   89.14    2.53 
  -8   2  -1   87.46    2.63 
   2   6  -1   87.12    2.35 
   6  -8  -1   88.67    2.88 
  -6   8  -1   86.63    2.46 
  -2  -6  -1   87.00    2.56 
   2   6  -1   90.15    2.85 
  -6   8   1   88.17    2.53 
   6  -8   1   88.17    2.85 
   8  -2   1   87.90    3.00 
   2   6   1   91.08    2.94 
  -8   2   1   95.68    2.65 
  -2  -6   1   92.42    2.58 
   8  -2   1   89.48    2.52 
  -6   8   1   85.28    2.45 
   2   6   1   90.00    2.36 
  -2  -6   1   91.45    2.51 
  -5   8  -1  126.19    3.52 
   8  -3  -1  128.53    3.42 
  -3  -5  -1  129.67    3.50 
   5  -8  -1  127.49    3.86 
  -3  -5  -1  128.59    3.39 
   3   5  -1  127.80    3.84 
  -5   8  -1  126.59    3.35 
  -8   3  -1  129.83    3.58 
   8  -3  -1  129.28    3.93 
   3   5   1  132.91    3.95 
  -3  -5   1  128.09    3.45 
  -5   8   1  117.53    3.44 
   8  -3   1  130.93    3.96 
   5  -8   1  130.02    3.84 
  -3  -5   1  127.40    3.50 
  -8   3   1  129.64    3.59 
   8  -3   1  127.44    3.40 
  -5   8   1  126.92    3.35 
   4  -8  -1    0.03    0.20 
  -4   8  -1   -0.11    0.16 
  -4  -4  -1   -0.14    0.15 
   4   4  -1   -0.01    0.18 
  -4  -4  -1   -0.07    0.11 
  -8   4  -1    0.03    0.18 
   8  -4  -1    0.11    0.24 
   4   4  -1    0.06    0.23 
   8  -4  -1   -0.18    0.13 
  -4   8  -1   -0.05    0.17 
   8  -4   1    0.19    0.26 
   4  -8   1    0.28    0.21 
   8  -4   1    0.16    0.15 
  -4   8   1   -0.24    0.17 
   4   4   1    0.13    0.23 
  -4  -4   1    0.08    0.14 
  -8   4   1    0.01    0.19 
   3  -8  -1   84.54    2.75 
  -5  -3  -1   83.68    2.47 
  -3   8  -1   84.98    2.59 
   3  -8  -1   86.28    2.45 
   8  -5  -1   89.81    2.34 
  -8   5  -1   83.04    2.52 
   5   3  -1   84.96    2.48 
   5   3  -1   85.68    2.81 
  -5  -3  -1   83.53    2.40 
   8  -5  -1   85.22    2.79 
  -3   8  -1   83.58    2.37 
  -8   5   1   83.63    2.50 
  -3   8   1   86.97    2.38 
   3  -8   1   83.89    2.70 
   8  -5   1   85.67    2.79 
  -5  -3   1   83.85    2.44 
  -8   6  -1   99.78    2.93 
   6   2  -1  105.78    3.34 
   2  -8  -1  103.21    3.23 
  -6  -2  -1  101.76    2.87 
  -8   6  -1  103.08    2.64 
  -2   8  -1  100.61    2.76 
   8  -6  -1  102.51    3.24 
   6   2  -1  101.18    2.90 
  -8   6   1  104.95    2.95 
   8  -6   1  107.07    3.26 
   6   2   1  100.08    3.37 
  -6  -2   1   99.13    2.89 
  -8   6   1  100.30    2.62 
   6   2   1  101.36    2.90 
  -2   8   1  104.75    2.78 
   2  -8   1  100.44    3.16 
   1  -8  -1    0.06    0.16 
  -7  -1  -1   -0.23    0.14 
   7   1  -1    0.35    0.23 
   8  -7  -1   -0.24    0.22 
  -8   7  -1    0.14    0.20 
  -1   8  -1   -0.07    0.19 
   7   1  -1   -0.01    0.28 
  -8   7  -1    0.12    0.17 
   1  -8  -1    0.19    0.23 
   7   1   1    0.02    0.19 
  -8   7   1   -0.05    0.17 
   1  -8   1    0.19    0.22 
  -7  -1   1    0.53    0.23 
  -8   7   1    0.20    0.21 
   1  -8   1    0.15    0.15 
   7   1   1   -0.01    0.32 
   8  -7   1    0.01    0.24 
  -1   8   1   -0.15    0.19 
   8   0  -1   40.78    1.78 
   0  -8  -1   37.42    1.35 
  -8   8  -1   39.88    1.32 
   0   8  -1   42.17    1.64 
  -8   0  -1   40.18    1.44 
  -8   8  -1   39.75    1.44 
   8   0  -1   37.65    1.41 
   0   8  -1   40.30    1.34 
   8  -8  -1   38.80    1.66 
  -8   8   1   40.26    1.41 
  -8   8   1   39.98    1.30 
   8  -8   1   38.96    1.65 
  -8   0   1   41.08    1.47 
   0   8   1   40.06    1.33 
   8   0   1   40.74    1.43 
   0  -8   1   40.45    1.35 
   8   0   1   40.44    1.84 
   0   8   1   39.60    1.67 
  -8   9  -1   61.81    1.88 
  -9   1  -1   61.00    2.01 
   1   8  -1   59.93    1.83 
   1   8  -1   62.86    2.25 
   8  -9  -1   62.46    2.29 
  -8   9  -1   60.07    1.99 
  -1  -8  -1   60.77    1.94 
   9  -1  -1   63.15    2.43 
   9  -1  -1   58.28    1.95 
   9  -1   1   60.63    1.97 
  -1  -8   1   61.91    1.94 
   8  -9   1   59.22    2.25 
   9  -1   1   61.53    2.46 
  -8   9   1   59.62    1.87 
  -8   9   1   59.71    1.95 
   1   8   1   63.99    1.85 
  -9   1   1   58.96    2.03 
   1   8   1   64.99    2.33 
   2   7  -1   61.71    2.19 
  -7   9  -1   58.80    1.94 
   9  -2  -1   59.68    1.91 
  -2  -7  -1   60.56    1.94 
  -7   9  -1   58.91    1.85 
   7  -9  -1   59.76    2.23 
   9  -2  -1   57.96    2.32 
  -9   2  -1   61.87    2.00 
  -7   9   1   62.62    1.95 
  -7   9   1   59.97    1.87 
   9  -2   1   61.98    2.40 
   2   7   1   57.85    2.22 
   9  -2   1   61.90    1.90 
   7  -9   1   60.81    2.21 
  -9   2   1   59.73    2.00 
   9  -3  -1    0.67    0.36 
   3   6  -1    1.10    0.35 
  -6   9  -1    0.61    0.27 
   6  -9  -1    1.15    0.34 
  -9   3  -1    1.28    0.34 
  -3  -6  -1    0.61    0.25 
  -6   9  -1    1.24    0.29 
   9  -3  -1    1.26    0.28 
   3   6   1    1.23    0.40 
   9  -3   1    0.86    0.37 
  -3  -6   1    0.99    0.29 
  -6   9   1    0.77    0.28 
   9  -3   1    0.74    0.24 
   6  -9   1    1.56    0.36 
  -9   3   1    1.24    0.31 
  -9   4  -1   65.20    2.09 
   4   5  -1   67.10    2.33 
   5  -9  -1   69.15    2.34 
   9  -4  -1   65.01    2.39 
   9  -4  -1   63.69    1.92 
  -4  -5  -1   63.41    2.03 
  -5   9  -1   62.26    1.94 
  -5   9  -1   68.54    2.23 
   9  -4   1   63.44    1.89 
  -5   9   1   64.71    1.96 
  -4  -5   1   64.95    1.96 
   9  -4   1   63.43    2.37 
   5  -9   1   62.21    2.25 
  -9   4   1   64.29    2.08 
  -4  -5   1   63.63    2.04 
   4   5   1   65.53    2.37 
  -9   5  -1   30.17    1.24 
   9  -5  -1   29.63    1.12 
  -5  -4  -1   31.15    1.21 
   9  -5  -1   32.87    1.47 
   4  -9  -1   32.67    1.42 
   5   4  -1   30.47    1.22 
  -5  -4  -1   33.01    1.12 
  -4   9  -1   31.52    1.17 
   5   4  -1   31.62    1.43 
  -4   9   1   30.42    1.17 
   9  -5   1   33.52    1.47 
   4  -9   1   31.36    1.36 
  -9   5   1   33.41    1.27 
   5   4   1   30.12    1.49 
  -5  -4   1   31.94    1.16 
   3  -9  -1   -0.02    0.21 
   9  -6  -1   -0.18    0.27 
   6   3  -1    0.35    0.24 
   6   3  -1    0.17    0.29 
  -3   9  -1   -0.10    0.21 
  -6  -3  -1    0.11    0.17 
  -6  -3  -1    0.20    0.21 
  -9   6  -1    0.23    0.24 
  -3   9   1   -0.27    0.19 
  -6  -3   1   -0.14    0.14 
   6   3   1   -0.23    0.28 
  -9   6   1    0.36    0.23 
   9  -6   1    0.20    0.28 
   3  -9   1    0.37    0.24 
   7   2  -1   49.61    1.70 
  -2   9  -1   49.03    1.61 
  -7  -2  -1   50.40    1.71 
   7   2  -1   51.41    2.05 
   2  -9  -1   49.12    1.95 
  -9   7  -1   49.32    1.72 
   9  -7  -1   49.88    1.97 
  -7  -2  -1   50.22    1.65 
   2  -9   1   50.29    1.89 
  -7  -2   1   49.64    1.68 
   9  -7   1   48.88    1.96 
   7   2   1   51.63    2.12 
  -9   7   1   47.86    1.69 
  -1   9  -1   46.51    1.53 
   9  -8  -1   45.08    1.88 
   1  -9  -1   45.97    1.51 
   8   1  -1   43.55    1.93 
   1  -9  -1   43.53    1.83 
  -9   8  -1   44.12    1.63 
   8   1  -1   46.45    1.62 
  -8  -1  -1   44.63    1.56 
  -9   8  -1   46.35    1.45 
   8   1   1   41.78    1.97 
   1  -9   1   46.61    1.82 
  -8  -1   1   45.32    1.60 
  -9   8   1   45.10    1.45 
   9  -8   1   47.06    1.88 
   8   1   1   43.08    1.59 
  -9   8   1   46.45    1.61 
  -1   9   1   43.40    1.50 
  -9   9  -1    3.63    0.48 
  -9   9  -1    2.43    0.38 
   9  -9  -1    2.62    0.54 
   9   0  -1    3.53    0.49 
  -9   0  -1    3.19    0.45 
   0  -9  -1    3.80    0.45 
   9   0  -1    3.81    0.68 
   0   9  -1    4.36    0.48 
   0  -9   1    4.11    0.62 
  -9   0   1    4.43    0.54 
   0   9   1    2.80    0.42 
   9  -9   1    2.17    0.49 
   9   0   1    3.45    0.48 
   0   9   1    3.44    0.58 
   9   0   1    2.85    0.65 
  -9   9   1    3.12    0.42 
  -9   9   1    2.90    0.44 
   1   9  -1   70.98    2.55 
  -1  -9  -1   68.93    2.22 
 -10   1  -1   69.62    2.31 
  10  -1  -1   69.89    2.74 
  -9  10  -1   68.49    2.12 
   9 -10  -1   68.04    2.61 
  10  -1  -1   67.72    2.24 
  -9  10  -1   67.68    2.27 
   1   9   1   69.18    2.60 
  10  -1   1   70.15    2.80 
  -1  -9   1   67.68    2.18 
   9 -10   1   72.22    2.62 
 -10   1   1   69.75    2.33 
  10  -1   1   69.44    2.24 
  -9  10   1   69.27    2.14 
   2   8  -1    0.15    0.29 
  -8  10  -1    0.00    0.28 
 -10   2  -1    0.25    0.27 
   8 -10  -1    0.44    0.37 
  10  -2  -1    0.35    0.27 
  10  -2  -1    0.33    0.42 
  -8  10  -1    0.74    0.31 
  -2  -8  -1    0.59    0.26 
  10  -2   1    0.15    0.42 
   8 -10   1    0.09    0.29 
  -8  10   1    0.44    0.31 
  -2  -8   1   -0.07    0.22 
  10  -2   1    0.26    0.25 
   2   8   1    0.41    0.33 
 -10   2   1    0.72    0.31 
 -10   3  -1   49.33    1.80 
  10  -3  -1   50.59    1.70 
  -7  10  -1   50.48    1.70 
   3   7  -1   50.42    1.97 
   7 -10  -1   52.50    2.07 
  10  -3  -1   47.76    2.12 
  -3  -7  -1   49.27    1.75 
 -10   3   1   50.14    1.81 
  -7  10   1   51.72    1.72 
   3   7   1   50.61    2.06 
  -3  -7   1   54.94    1.78 
   7 -10   1   50.78    2.01 
  10  -3   1   53.44    2.23 
  10  -3   1   50.85    1.69 
  -4  -6  -1   45.86    1.64 
  -6  10  -1   45.60    1.58 
  10  -4  -1   44.73    1.52 
   6 -10  -1   44.76    1.88 
 -10   4  -1   45.25    1.68 
  10  -4  -1   46.02    1.98 
   4   6  -1   46.11    1.87 
  -4  -6   1   45.01    1.63 
  -6  10   1   46.64    1.56 
 -10   4   1   47.15    1.70 
   6 -10   1   46.63    1.85 
  10  -4   1   44.92    1.98 
   4   6   1   45.66    1.93 
   5 -10  -1   -0.25    0.23 
  -5  10  -1    0.52    0.29 
   5   5  -1    0.54    0.34 
 -10   5  -1    0.42    0.27 
  -5  -5  -1    0.08    0.22 
  10  -5  -1    0.82    0.40 
 -10   5   1    0.33    0.28 
  -5  -5   1    0.26    0.20 
  10  -5   1    0.13    0.34 
   5 -10   1    0.36    0.29 
  -5  -5   1    0.56    0.26 
  -5  10   1    0.39    0.27 
   5   5   1    0.08    0.30 
   4 -10  -1   62.03    2.35 
  10  -6  -1   62.68    2.43 
   6   4  -1   64.82    2.40 
   6   4  -1   63.83    2.10 
  -4  10  -1   63.89    2.00 
  -6  -4  -1   63.84    2.09 
 -10   6  -1   63.87    2.13 
  -4  10   1   64.15    2.00 
  10  -6   1   64.69    2.44 
 -10   6   1   60.85    2.11 
   6   4   1   67.94    2.54 
   4 -10   1   61.24    2.29 
  -6  -4   1   62.77    2.01 
  -7  -3  -1   55.80    1.91 
  -3  10  -1   54.23    1.82 
 -10   7  -1   54.54    1.93 
  10  -7  -1   56.67    2.25 
   7   3  -1   60.30    2.27 
   3 -10  -1   58.16    2.21 
  -7  -3  -1   56.30    1.82 
   7   3  -1   54.28    1.91 
  10  -7   1   55.20    2.22 
 -10   7   1   55.19    1.92 
   7   3   1   51.11    2.29 
  -3  10   1   56.04    1.82 
  -7  -3   1   56.56    1.86 
   3 -10   1   57.54    2.13 
   8   2  -1    1.43    0.37 
  -8  -2  -1    2.12    0.37 
   2 -10  -1    2.30    0.48 
  -8  -2  -1    2.06    0.41 
  10  -8  -1    1.77    0.50 
 -10   8  -1    2.13    0.42 
   8   2  -1    2.08    0.53 
  -2  10  -1    1.79    0.39 
 -10   8   1    1.42    0.37 
   2 -10   1    2.08    0.49 
  10  -8   1    1.84    0.49 
  -8  -2   1    2.07    0.40 
  -2  10   1    1.86    0.40 
   8   2   1    1.61    0.53 
   9   1  -1   52.96    2.30 
   1 -10  -1   53.60    2.19 
  -9  -1  -1   55.61    1.91 
  10  -9  -1   57.29    2.29 
 -10   9  -1   54.88    1.95 
  -9  -1  -1   57.04    1.93 
  -1  10  -1   58.08    1.84 
   9   1  -1   56.12    1.95 
 -10   9   1   54.91    1.93 
  -1  10   1   58.05    1.85 
   1 -10   1   52.14    2.13 
   9   1   1   53.92    2.38 
  10  -9   1   52.31    2.21 
  -9  -1   1   52.02    1.91 
  10   0  -1   44.05    2.10 
 -10   0  -1   42.40    1.65 
 -10  10  -1   43.62    1.55 
 -10   0  -1   46.74    1.71 
  10 -10  -1   41.46    1.97 
   0  10  -1   45.45    1.59 
   0 -10  -1   42.82    1.94 
 -10  10  -1   45.33    1.71 
  10   0  -1   44.61    1.70 
  10 -10   1   45.93    2.01 
 -10  10   1   42.95    1.67 
 -10  10   1   43.90    1.55 
 -10   0   1   45.83    1.72 
   0  10   1   46.16    1.59 
  10   0   1   41.48    2.13 
   0 -10   1   44.54    1.90 
  11  -1  -1    0.31    0.33 
  10 -11  -1    0.16    0.38 
  11  -1  -1    0.58    0.53 
 -11   1  -1    0.04    0.29 
 -10  11  -1    0.14    0.32 
 -11   1  -1   -0.04    0.29 
  -1 -10   1    0.51    0.36 
  11  -1   1   -0.08    0.47 
  10 -11   1    0.28    0.35 
   1  10   1    0.30    0.40 
 -11   1   1   -0.04    0.30 
 -10  11   1    0.57    0.36 
 -11   2  -1   53.28    1.93 
   2   9  -1   54.38    2.14 
   9 -11  -1   50.72    2.19 
  11  -2  -1   50.25    2.32 
  -9  11  -1   50.52    1.76 
  11  -2  -1   50.35    1.82 
  -9  11   1   49.31    1.77 
 -11   2   1   49.05    1.89 
   2   9   1   54.02    2.21 
   9 -11   1   48.88    2.11 
  11  -2   1   49.22    1.79 
  11  -2   1   50.80    2.38 
  -2  -9   1   50.52    1.81 
  11  -3  -1   37.13    1.91 
  -8  11  -1   34.10    1.43 
  11  -3  -1   40.51    1.48 
   8 -11  -1   38.77    1.80 
 -11   3  -1   39.50    1.58 
  -3  -8  -1   38.00    1.50 
   3   8  -1   37.83    1.71 
  11  -3   1   37.93    1.44 
  -8  11   1   37.25    1.47 
   8 -11   1   36.96    1.73 
  -3  -8   1   39.03    1.50 
 -11   3   1   40.06    1.60 
   3   8   1   37.61    1.78 
  11  -3   1   36.63    1.93 
   7 -11  -1    0.06    0.29 
  -4  -7  -1   -0.05    0.24 
 -11   4  -1    0.10    0.28 
  11  -4  -1    0.21    0.40 
   4   7  -1    0.16    0.31 
  -7  11  -1   -0.29    0.26 
  -7  11   1   -0.19    0.29 
   4   7   1    0.11    0.32 
  11  -4   1   -0.49    0.37 
 -11   4   1   -0.03    0.26 
   7 -11   1   -0.14    0.28 
  -4  -7   1    0.21    0.26 
  11  -5  -1   34.40    1.76 
   5   6  -1   34.26    1.61 
  -6  11  -1   35.63    1.38 
 -11   5  -1   34.29    1.46 
  -5  -6  -1   32.34    1.40 
   6 -11  -1   32.66    1.64 
  11  -5   1   36.92    1.80 
   5   6   1   35.03    1.71 
  -6  11   1   34.24    1.39 
   6 -11   1   34.74    1.62 
  -5  -6   1   35.11    1.43 
 -11   5   1   34.50    1.46 
  -6  -5  -1   65.96    2.20 
  11  -6  -1   64.04    2.58 
   5 -11  -1   66.16    2.51 
 -11   6  -1   68.28    2.28 
   6   5  -1   67.18    2.50 
  -5  11  -1   65.80    2.12 
  -5  11   1   65.37    2.13 
   5 -11   1   66.74    2.48 
  11  -6   1   62.99    2.59 
 -11   6   1   61.60    2.24 
  -6  -5   1   67.65    2.22 
   6   5   1   67.27    2.63 
  11  -7  -1    0.26    0.43 
  -7  -4  -1    0.00    0.27 
   4 -11  -1    0.13    0.28 
  -4  11  -1   -0.19    0.28 
 -11   7  -1   -0.07    0.30 
   7   4  -1    0.09    0.35 
  -7  -4   1    0.19    0.24 
  -4  11   1   -0.07    0.31 
   4 -11   1    0.04    0.28 
   7   4   1   -0.08    0.33 
  -7  -4   1    0.40    0.27 
 -11   7   1   -0.28    0.27 
  11  -7   1    0.01    0.39 
  11  -8  -1   42.24    1.95 
   8   3  -1   42.72    1.66 
  -8  -3  -1   42.25    1.64 
   3 -11  -1   42.64    1.91 
 -11   8  -1   40.43    1.65 
  -3  11  -1   41.99    1.56 
   8   3  -1   40.36    1.90 
  -8  -3  -1   42.47    1.57 
   3 -11   1   42.35    1.84 
  11  -8   1   43.67    1.97 
  -3  11   1   39.98    1.55 
   8   3   1   41.19    2.02 
 -11   8   1   41.05    1.63 
  -8  -3   1   41.07    1.58 
   9   2  -1   51.82    1.90 
  11  -9  -1   48.53    2.20 
  -9  -2  -1   49.65    1.85 
   9   2  -1   48.37    2.21 
  -9  -2  -1   51.12    1.81 
  -2  11  -1   48.40    1.75 
 -11   9  -1   47.03    1.89 
   2 -11  -1   50.49    2.13 
 -11   9   1   51.64    1.89 
  -2  11   1   50.14    1.77 
   2 -11   1   52.42    2.11 
  -9  -2   1   52.68    1.86 
  11  -9   1   51.12    2.22 
   9   2   1   51.20    2.32 
  10   1  -1    1.22    0.53 
  10   1  -1    1.14    0.41 
 -10  -1  -1    1.96    0.43 
  11 -10  -1    1.41    0.57 
 -10  -1  -1    1.82    0.45 
   1 -11  -1    1.42    0.48 
  -1  11  -1    1.40    0.41 
 -11  10  -1    0.78    0.38 
  -1  11   1    1.01    0.39 
  10   1   1    1.18    0.60 
 -10  -1   1    0.98    0.37 
  11 -10   1    1.01    0.50 
   1 -11   1    1.73    0.49 
 -11  10   1    1.14    0.37 
  11   0  -1   26.35    1.33 
  11   0  -1   26.07    1.63 
   0 -11  -1   24.55    1.46 
  11 -11  -1   25.10    1.58 
 -11   0  -1   26.29    1.27 
 -11   0  -1   27.60    1.29 
 -11  11  -1   25.71    1.36 
  11 -11   1   24.54    1.53 
  11   0   1   24.48    1.67 
 -11   0   1   25.67    1.30 
   0 -11   1   24.71    1.41 
  12  -1  -1   21.01    1.20 
  12  -1  -1   21.20    1.59 
 -12   1  -1   24.77    1.22 
  -1 -11   1   19.80    1.31 
  12  -1   1   25.89    1.77 
  12  -2  -1   28.51    1.34 
  10 -12  -1   30.50    1.72 
  12  -2  -1   28.47    1.77 
  -2 -10  -1   27.44    1.32 
 -10  12  -1   27.94    1.30 
 -12   2  -1   28.65    1.40 
   2  10  -1   29.79    1.58 
 -12   2   1   31.04    1.45 
   2  10   1   28.13    1.61 
 -10  12   1   28.92    1.31 
  10 -12   1   28.51    1.61 
  12  -2   1   25.37    1.76 
 -12   3  -1    0.48    0.38 
   3   9  -1    0.00    0.34 
  12  -3  -1    0.42    0.54 
  -9  12  -1   -0.20    0.34 
  -3  -9  -1    0.54    0.33 
  12  -3  -1    0.75    0.36 
   9 -12  -1    0.94    0.51 
  -9  12   1    0.23    0.36 
  -3  -9   1    0.50    0.34 
   9 -12   1    0.18    0.40 
   3   9   1    0.63    0.46 
 -12   3   1    1.11    0.43 
  12  -3   1    0.79    0.61 
   8 -12  -1   39.72    1.95 
   4   8  -1   41.87    1.90 
  12  -4  -1   33.36    2.04 
 -12   4  -1   42.10    1.75 
  -4  -8  -1   44.68    1.70 
  -8  12  -1   41.32    1.62 
  12  -4   1   40.11    2.16 
  -8  12   1   41.61    1.64 
 -12   4   1   41.85    1.72 
   8 -12   1   41.07    1.91 
  -4  -8   1   42.43    1.66 
   4   8   1   43.11    1.97 
   7 -12  -1   45.81    2.04 
  12  -5  -1   44.47    2.17 
  -5  -7  -1   47.32    1.78 
 -12   5  -1   44.87    1.81 
   5   7  -1   45.59    2.00 
  -7  12  -1   44.70    1.70 
 -12   5   1   44.98    1.82 
  12  -5   1   45.18    2.19 
  -7  12   1   45.72    1.73 
   5   7   1   43.01    2.04 
   7 -12   1   43.49    1.98 
   6   6  -1    0.61    0.44 
   6 -12  -1    0.50    0.43 
  -6  12  -1    0.54    0.34 
 -12   6  -1    0.86    0.41 
  12  -6  -1    0.75    0.55 
  -6  -6  -1    0.17    0.32 
  -6  -6   1    0.03    0.28 
  -6  12   1   -0.14    0.31 
 -12   6   1    0.92    0.41 
   6   6   1    0.20    0.41 
   6 -12   1    0.45    0.37 
  12  -6   1   -0.03    0.47 
  -7  -5  -1   62.02    2.20 
   5 -12  -1   61.62    2.50 
   7   5  -1   64.16    2.50 
  -5  12  -1   63.32    2.12 
 -12   7  -1   60.45    2.23 
  12  -7  -1   61.17    2.59 
   7   5   1   63.39    2.62 
   5 -12   1   57.90    2.41 
 -12   7   1   63.81    2.25 
  -7  -5   1   59.20    2.16 
  12  -7   1   58.88    2.57 
  -5  12   1   60.82    2.11 
  12  -8  -1   31.87    1.78 
   4 -12  -1   32.60    1.70 
 -12   8  -1   35.47    1.56 
  -8  -4  -1   32.64    1.46 
   8   4  -1   34.41    1.74 
  -4  12  -1   33.40    1.43 
 -12   8   1   35.84    1.53 
   8   4   1   35.98    1.87 
  12  -8   1   32.92    1.78 
  -4  12   1   32.71    1.43 
   4 -12   1   33.49    1.67 
  -8  -4   1   33.88    1.48 
   9   3  -1    2.39    0.67 
  12  -9  -1    2.00    0.61 
 -12   9  -1    2.49    0.51 
  -3  12  -1    2.25    0.51 
  -9  -3  -1    2.09    0.49 
   3 -12  -1    2.31    0.60 
  12  -9   1    2.91    0.71 
 -12   9   1    2.01    0.51 
  -9  -3   1    2.62    0.48 
  -9  -3   1    1.90    0.49 
   3 -12   1    2.48    0.56 
   9   3   1    1.56    0.60 
  -3  12   1    2.40    0.52 
   2 -12  -1   41.18    1.95 
 -12  10  -1   39.98    1.71 
  10   2  -1   40.52    1.99 
  12 -10  -1   36.91    2.00 
 -10  -2  -1   37.95    1.66 
  -2  12  -1   40.41    1.61 
 -12  10   1   40.01    1.69 
   2 -12   1   41.82    1.94 
  -2  12   1   39.66    1.60 
 -10  -2   1   41.63    1.71 
  10   2   1   36.60    2.03 
  12 -10   1   36.74    1.96 
 -10  -2   1   39.01    1.63 
 -11  -1  -1   31.01    1.44 
 -12  11  -1   30.64    1.48 
  11   1  -1   28.93    1.80 
  -1  12  -1   33.16    1.44 
 -11  -1   1   31.61    1.48 
  -1  12   1   32.38    1.43 
  11   1   1   34.02    1.98 
  -3 -10  -1   20.88    1.28 
  13  -4  -1   35.86    2.10 
   4   9  -1   37.04    1.85 
  -4  -9  -1   36.38    1.61 
  -4  -9   1   37.12    1.61 
   5   8  -1    0.13    0.42 
  13  -5  -1    0.34    0.59 
  -5  -8  -1    0.53    0.36 
   5   8   1    0.00    0.43 
  -5  -8   1   -0.45    0.28 
  13  -5   1    0.18    0.51 
  13  -6  -1   26.22    1.71 
   6   7  -1   26.30    1.53 
  -6  -7  -1   24.10    1.30 
  -6  -7   1   25.57    1.33 
   6   7   1   24.47    1.56 
  13  -6   1   24.91    1.71 
   7 -13   1   26.74    1.65 
   7   6  -1   27.26    1.56 
  13  -7  -1   30.13    1.81 
   7   6   1   23.41    1.59 
  -7  -6   1   29.10    1.49 
  13  -7   1   26.08    1.70 
 -13   7   1   27.72    1.45 
   8   5  -1    0.84    0.48 
  13  -8  -1    0.40    0.54 
 -13   8   1   -0.10    0.38 
   8   5   1   -0.06    0.45 
   9   4  -1   16.81    1.31 
   9   4   1   19.24    1.44 
   0   0  -2  956.48   23.95 
   0   0  -2  988.84   24.09 
   0   0   2 1000.00   22.86 
   0   0   2  995.05   24.97 
  -1   1  -2   74.08    1.91 
   1   0  -2   73.48    1.87 
   1  -1  -2   75.90    1.96 
   0   1  -2   68.93    1.96 
   1   0  -2   72.45    1.93 
  -1   1  -2   72.87    1.83 
  -1   0  -2   76.69    1.88 
   0   1  -2   74.17    1.84 
   0  -1  -2   76.25    1.88 
   1  -1  -2   75.67    1.91 
   1   0  -2   73.74    1.91 
  -1   0  -2   73.95    1.86 
   0  -1   2   74.76    1.93 
  -1   1   2   75.33    1.87 
   1   0   2   72.33    1.79 
  -1   0   2   72.26    1.80 
   0   1   2   73.93    1.78 
   1  -1   2   72.68    1.78 
   1  -1   2   75.79    1.97 
   1   0   2   74.12    2.02 
   0  -1   2   73.88    1.78 
  -1   1   2   75.45    1.78 
   0   1   2   76.61    2.02 
   1  -2  -2  153.28    3.72 
   1   1  -2  148.84    3.70 
   1   1  -2  150.66    3.91 
  -1   2  -2  148.86    3.54 
   1   1  -2  150.24    3.79 
  -2   1  -2  149.48    3.77 
  -1   2  -2  152.39    3.62 
   2  -1  -2  149.54    3.91 
  -2   1  -2  145.74    3.65 
  -1  -1  -2  151.16    3.71 
  -1   2  -2  145.58    3.80 
   2  -1  -2  150.87    3.71 
  -1  -1  -2  150.28    3.70 
  -1  -1   2  150.78    3.51 
  -1   2   2  155.86    3.55 
   2  -1   2  147.14    3.96 
   1   1   2  146.16    4.02 
   1   1   2  150.47    3.50 
  -1   2   2  150.78    3.95 
   1  -2   2  153.75    3.92 
   2  -1   2  148.72    3.50 
  -2   1   2  148.27    3.76 
  -2   1   2  148.65    3.51 
  -2   2  -2   39.72    1.12 
   2   0  -2   40.44    1.18 
   0   2  -2   36.31    1.05 
   2  -2  -2   41.75    1.19 
   0   2  -2   39.07    1.04 
   0   2  -2   38.89    1.18 
   2   0  -2   39.75    1.09 
   0   2  -2   40.20    1.15 
  -2   2  -2   40.40    1.04 
  -2   0  -2   39.08    1.08 
  -2   0  -2   40.39    1.09 
   0  -2  -2   41.75    1.10 
   2  -2  -2   42.21    1.12 
  -2   0   2   38.87    1.12 
   0   2   2   40.06    1.24 
   2   0   2   39.74    1.25 
   0   2   2   40.18    1.04 
  -2   0   2   40.57    1.03 
  -2   2   2   40.00    1.08 
   2   0   2   41.23    1.01 
  -2   2   2   41.21    1.04 
   2  -2   2   40.89    1.18 
  -1  -2  -2  104.06    2.66 
   1   2  -2   98.36    2.81 
   3  -1  -2  104.66    2.83 
  -2   3  -2  101.74    2.70 
   2  -3  -2  104.18    2.68 
   3  -1  -2  102.33    2.64 
  -3   1  -2  103.53    2.61 
   1   2  -2  104.17    2.72 
   1   2  -2  105.50    2.50 
   1   2  -2  105.44    2.63 
  -1  -2  -2  106.67    2.59 
   2  -3  -2  103.71    2.86 
  -3   1  -2  103.50    2.69 
  -2   3  -2  104.31    2.53 
  -3   1   2  105.07    2.46 
   1   2   2  105.42    2.49 
  -2   3   2  102.38    2.53 
   3  -1   2  104.69    2.89 
  -3   1   2  104.45    2.70 
   3  -1   2  104.10    2.45 
   1   2   2  101.00    2.94 
   2  -3   2  101.35    2.83 
  -2   3   2  105.52    2.62 
  -1   3  -2   37.72    1.04 
  -3   2  -2   38.41    1.00 
  -3   2  -2   37.99    0.99 
   2   1  -2   38.07    1.19 
  -3   2  -2   37.35    1.11 
  -1   3  -2   38.07    1.17 
   1  -3  -2   38.84    1.08 
  -2  -1  -2   37.70    1.08 
   3  -2  -2   37.13    1.17 
  -1   3  -2   39.52    1.00 
   3  -2  -2   39.17    1.07 
   2   1  -2   38.21    1.08 
  -2  -1  -2   39.97    1.05 
  -2  -1   2   38.66    0.97 
  -2  -1   2   37.40    1.11 
   2   1   2   40.76    0.96 
   1  -3   2   37.77    1.16 
   3  -2   2   37.07    1.19 
  -3   2   2   38.98    1.00 
  -3   2   2   37.81    1.09 
   2   1   2   36.13    1.28 
  -1   3   2   39.59    1.23 
  -1   3   2   38.64    1.04 
   3  -3  -2  255.44    5.99 
   3   0  -2  246.09    6.01 
   0   3  -2  238.97    6.16 
  -3   0  -2  244.28    5.99 
   0   3  -2  246.44    6.37 
   3   0  -2  203.72    6.39 
  -3   3  -2  237.55    6.11 
  -3   3  -2  246.48    5.72 
  -3   0  -2  239.68    6.07 
   3  -3  -2  252.26    6.41 
   0   3  -2  258.31    5.96 
   0  -3  -2  254.51    6.01 
   0   3  -2  244.08    5.72 
  -3   3   2  245.12    6.06 
   3   0   2  244.28    6.51 
  -3   3   2  245.06    5.72 
   3  -3   2  226.79    6.39 
   0   3   2  245.13    5.71 
   3   0   2  242.77    5.61 
  -3   0   2  251.63    5.64 
   0   3   2  248.97    6.48 
  -3   0   2  238.94    6.11 
   4  -1  -2   59.90    1.64 
   1   3  -2   62.35    1.63 
  -1  -3  -2   60.32    1.65 
   4  -1  -2   58.22    1.80 
   1   3  -2   58.61    1.53 
  -1  -3  -2   63.03    1.55 
   1   3  -2   59.89    1.69 
  -3   4  -2   58.40    1.68 
  -3   4  -2   60.89    1.58 
   1   3  -2   58.83    1.77 
   3  -4  -2   59.70    1.66 
   3  -4  -2   59.33    1.81 
  -4   1  -2   59.63    1.67 
  -4   1   2   60.86    1.45 
   4  -1   2   60.87    1.46 
   3  -4   2   57.96    1.78 
   1   3   2   60.84    1.90 
   4  -1   2   58.86    1.61 
  -3   4   2   59.79    1.57 
  -3   4   2   60.80    1.61 
   1   3   2   60.71    1.53 
  -4   1   2   55.35    1.68 
   4  -1   2   58.29    1.86 
  -2  -2  -2  226.74    5.66 
   2   2  -2  232.71    5.33 
  -2   4  -2  227.10    5.42 
   2  -4  -2  235.53    6.09 
   4  -2  -2  228.24    6.05 
   4  -2  -2  227.00    5.64 
  -4   2  -2  218.43    5.75 
   2  -4  -2  231.51    5.65 
  -4   2  -2  232.44    5.32 
  -2  -2  -2  235.51    5.67 
   2   2  -2  227.14    5.66 
  -2   4  -2  219.17    5.77 
   2   2  -2  231.56    6.05 
  -2   4   2  232.13    5.64 
  -2   4   2  221.01    5.41 
   2   2   2  219.10    6.16 
  -4   2   2  229.57    5.76 
   2  -4   2  225.44    5.51 
   2   2   2  235.58    5.32 
   2  -4   2  225.11    6.02 
   4  -2   2  222.25    6.08 
  -4   2   2  233.46    5.33 
  -2  -2   2  222.30    5.75 
   4  -2   2  232.59    5.59 
   3   1  -2   42.38    1.26 
  -3  -1  -2   43.33    1.27 
   4  -3  -2   43.73    1.39 
  -4   3  -2   43.28    1.30 
  -1   4  -2   44.41    1.18 
   4  -3  -2   44.27    1.22 
  -1   4  -2   43.57    1.22 
  -3  -1  -2   43.74    1.24 
   1  -4  -2   44.04    1.25 
  -4   3  -2   45.84    1.17 
   3   1  -2   44.55    1.43 
  -1   4  -2   41.73    1.38 
  -4   3   2   43.99    1.17 
   4  -3   2   44.40    1.14 
  -3  -1   2   44.38    1.12 
  -1   4   2   42.56    1.20 
   1  -4   2   44.67    1.37 
  -3  -1   2   45.62    1.31 
  -1   4   2   44.49    1.45 
   3   1   2   41.82    1.50 
   3   1   2   46.14    1.09 
   4  -4  -2   51.96    1.40 
   0   4  -2   51.47    1.39 
  -4   0  -2   49.14    1.44 
   4  -4  -2   49.26    1.59 
   0  -4  -2   52.29    1.44 
  -4   4  -2   53.65    1.49 
   0   4  -2   50.40    1.50 
   0   4  -2   51.19    1.56 
   0   4  -2   48.06    1.35 
   4   0  -2   48.03    1.43 
  -4   4  -2   49.79    1.35 
   4   0  -2   51.01    1.63 
   4   0   2   50.46    1.43 
   4  -4   2   48.19    1.59 
  -4   4   2   49.03    1.41 
  -4   0   2   49.55    1.21 
   4   0   2   49.34    1.70 
  -4   0   2   51.41    1.49 
   0   4   2   49.55    1.65 
   0   4   2   51.15    1.36 
  -4   4   2   49.27    1.35 
   5  -1  -2  140.37    4.06 
  -4   5  -2  140.58    3.79 
   1   4  -2  146.47    4.01 
   5  -1  -2  142.36    3.72 
  -1  -4  -2  142.60    3.73 
   4  -5  -2  147.82    4.06 
   1   4  -2  149.36    3.71 
  -5   1  -2  140.97    3.78 
   1   4  -2  141.60    3.52 
  -4   5  -2  146.96    3.58 
   4  -5  -2  149.99    3.70 
   1   4  -2  145.40    3.79 
  -1  -4  -2  153.23    3.64 
  -4   5   2  143.71    3.56 
   1   4   2  142.64    4.13 
  -5   1   2  145.05    3.82 
   1   4   2  141.21    3.52 
   5  -1   2  143.93    3.70 
   5  -1   2  141.78    4.13 
  -4   5   2  145.87    3.72 
   4  -5   2  143.82    4.03 
   2   3  -2   27.74    0.90 
   3  -5  -2   28.44    1.04 
  -3   5  -2   26.58    0.92 
   5  -2  -2   27.73    1.03 
  -3   5  -2   27.38    0.87 
   5  -2  -2   27.73    0.88 
  -5   2  -2   27.01    0.92 
   3  -5  -2   28.50    0.92 
  -2  -3  -2   23.22    0.79 
  -2  -3  -2   28.42    0.92 
   2   3  -2   26.91    0.79 
   2   3  -2   28.58    1.01 
   3  -5   2   27.27    1.00 
  -3   5   2   28.78    0.83 
  -3   5   2   26.43    0.86 
   2   3   2   27.43    1.12 
   5  -2   2   27.43    0.73 
  -5   2   2   27.31    0.74 
   5  -2   2   25.94    1.04 
   5  -2   2   27.63    0.84 
   2   3   2   28.01    0.78 
  -2  -3   2   26.23    0.90 
   2  -5  -2   51.12    1.70 
   3   2  -2   54.67    1.52 
  -3  -2  -2   53.19    1.46 
  -5   3  -2   50.76    1.53 
   2  -5  -2   51.76    1.47 
  -2   5  -2   49.27    1.58 
   5  -3  -2   53.71    1.68 
  -2   5  -2   50.76    1.44 
   5  -3  -2   52.23    1.46 
  -3  -2  -2   50.28    1.51 
  -5   3  -2   52.84    1.35 
   3   2  -2   54.13    1.68 
  -2   5   2   51.95    1.44 
   2  -5   2   52.75    1.63 
   3   2   2   51.65    1.30 
  -5   3   2   51.95    1.35 
  -2   5   2   54.39    1.43 
   2  -5   2   52.02    1.36 
  -3  -2   2   49.86    1.51 
  -3  -2   2   51.70    1.31 
   5  -3   2   52.91    1.39 
   3   2   2   49.28    1.78 
  -5   3   2   52.48    1.53 
   5  -3   2   52.59    1.70 
  -5   4  -2  188.77    4.40 
   5  -4  -2  186.12    4.59 
  -4  -1  -2  184.18    4.69 
   4   1  -2  188.43    5.08 
   4   1  -2  186.50    4.68 
   5  -4  -2  193.21    5.05 
  -5   4  -2  179.15    4.75 
  -1   5  -2  187.25    4.46 
  -1   5  -2  172.60    4.82 
   1  -5  -2  188.56    4.64 
  -4  -1  -2  184.12    4.67 
   5  -4   2  185.72    5.03 
   4   1   2  155.28    5.11 
  -1   5   2  182.34    4.46 
  -5   4   2  179.25    4.39 
   5  -4   2  186.37    4.48 
  -5   4   2  180.14    4.71 
   1  -5   2  191.62    4.57 
  -1   5   2  186.79    5.09 
  -4  -1   2  186.38    4.75 
   1  -5   2  188.20    5.00 
  -4  -1   2  173.85    4.31 
   5   0  -2   13.68    0.72 
   0   5  -2   13.50    0.55 
  -5   5  -2   13.09    0.54 
   5   0  -2   13.32    0.58 
  -5   0  -2   14.05    0.58 
   0  -5  -2   13.87    0.57 
   5  -5  -2   14.20    0.52 
   0   5  -2   15.33    0.63 
   0   5  -2   13.86    0.66 
   0   5  -2   13.16    0.54 
   5  -5  -2   13.49    0.69 
  -5   5  -2   12.23    0.58 
  -5   0   2   12.96    0.60 
   0   5   2   12.89    0.72 
   0   5   2   13.76    0.54 
   5   0   2   13.88    0.58 
   5   0   2   13.56    0.78 
  -5   5   2   11.86    0.54 
   5  -5   2   13.43    0.67 
  -5   6  -2   38.35    1.27 
  -6   1  -2   39.06    1.27 
   6  -1  -2   39.98    1.48 
   1   5  -2   37.98    1.15 
  -1  -5  -2   37.70    1.24 
   5  -6  -2   38.24    1.43 
   6  -1  -2   39.68    1.25 
   1   5  -2   40.41    1.40 
   1   5  -2   39.17    1.23 
  -1  -5  -2   40.73    1.11 
   5  -6  -2   40.54    1.17 
   1   5  -2   39.89    1.25 
  -5   6  -2   38.69    1.20 
   6  -1   2   38.11    1.22 
   5  -6   2   40.05    1.42 
  -5   6   2   38.77    1.21 
   1   5   2   38.65    1.14 
   6  -1   2   38.80    1.53 
   1   5   2   38.32    1.49 
  -6   1   2   39.19    1.30 
  -5   6   2   37.92    1.18 
   6  -2  -2   55.51    1.61 
  -4   6  -2   54.55    1.57 
   6  -2  -2   53.41    1.84 
  -2  -4  -2   56.96    1.52 
   4  -6  -2   53.66    1.83 
   4  -6  -2   55.16    1.62 
   2   4  -2   55.28    1.62 
  -2  -4  -2   56.31    1.64 
   2   4  -2   54.45    1.78 
   2   4  -2   56.38    1.48 
  -6   2  -2   55.07    1.66 
   6  -2   2   55.04    1.57 
   2   4   2   55.63    1.47 
  -4   6   2   52.23    1.55 
  -4   6   2   58.15    1.57 
   6  -2   2   54.38    1.89 
   2   4   2   52.05    1.89 
  -6   2   2   55.59    1.37 
  -6   2   2   55.41    1.68 
   6  -2   2   53.62    1.37 
  -2  -4   2   57.66    1.64 
   4  -6   2   54.09    1.80 
   3  -6  -2  115.38    2.98 
   3  -6  -2  112.89    3.32 
   6  -3  -2  111.90    3.30 
   3   3  -2  114.53    2.75 
  -3   6  -2  110.37    3.09 
   3   3  -2  112.60    3.02 
  -3   6  -2  109.20    2.88 
  -3  -3  -2  109.79    3.01 
   3   3  -2  115.45    3.29 
  -3  -3  -2  115.51    2.94 
   6  -3  -2  113.67    2.95 
  -6   3  -2  119.18    2.74 
   6  -3   2  115.45    2.90 
   3  -6   2  112.56    2.81 
  -3   6   2  110.07    2.88 
  -3  -3   2  111.15    3.03 
  -3   6   2  114.58    2.94 
   3   3   2  106.98    3.40 
  -6   3   2  110.62    3.07 
  -6   3   2  108.70    2.72 
   3  -6   2  109.35    3.23 
   3   3   2  112.76    2.73 
   6  -3   2  111.59    3.32 
  -4  -2  -2   55.33    1.59 
   2  -6  -2   54.90    1.87 
  -6   4  -2   52.01    1.66 
   4   2  -2   57.17    1.87 
  -4  -2  -2   55.15    1.65 
  -2   6  -2   55.95    1.58 
  -6   4  -2   55.27    1.47 
  -2   6  -2   54.74    1.77 
   6  -4  -2   56.37    1.56 
   2  -6  -2   54.82    1.59 
   4   2  -2   54.47    1.64 
   6  -4  -2   57.33    1.85 
   4   2   2   56.17    1.37 
  -2   6   2   55.50    1.59 
  -6   4   2   55.62    1.67 
   2  -6   2   56.10    1.79 
  -4  -2   2   55.60    1.66 
  -6   4   2   55.88    1.47 
  -4  -2   2   57.22    1.40 
   4   2   2   54.45    1.98 
  -2   6   2   54.58    1.57 
   6  -4   2   56.23    1.48 
   2  -6   2   53.94    1.49 
  -1   6  -2   19.59    0.83 
  -6   5  -2   20.98    0.71 
   1  -6  -2   20.09    0.75 
   5   1  -2   20.25    0.96 
   6  -5  -2   20.92    0.70 
  -6   5  -2   20.18    0.81 
  -5  -1  -2   20.04    0.79 
   5   1  -2   19.97    0.79 
  -1   6  -2   19.44    0.75 
  -5  -1  -2   21.32    0.77 
   6  -5  -2   20.44    0.92 
   6  -5   2   20.24    0.61 
   1  -6   2   21.64    0.89 
  -1   6   2   19.87    0.94 
  -5  -1   2   19.05    0.79 
  -6   5   2   19.47    0.77 
   6  -5   2   20.16    0.91 
   5   1   2   19.59    1.03 
  -6   5   2   20.90    0.71 
   1  -6   2   18.82    0.69 
  -1   6   2   20.94    0.75 
  -6   0  -2   99.83    2.79 
   0  -6  -2  103.43    2.75 
   6  -6  -2  102.90    2.63 
   0   6  -2  103.61    2.80 
   6  -6  -2   97.18    3.04 
   0   6  -2  101.92    2.62 
   6   0  -2   99.03    2.77 
   6   0  -2  104.75    3.14 
  -6   6  -2  103.15    2.83 
   0   6  -2  100.65    3.00 
  -6   6  -2  101.91    2.61 
   6   0   2   95.36    3.18 
  -6   6   2  100.90    2.76 
   6  -6   2   96.56    3.02 
   0   6   2   98.63    2.60 
  -6   6   2   98.23    2.60 
   6   0   2  102.70    2.76 
   0  -6   2   98.88    2.69 
   0   6   2  101.28    3.14 
  -6   0   2   97.37    2.82 
  -7   1  -2   39.96    1.36 
   1   6  -2   39.67    1.52 
   6  -7  -2   41.05    1.56 
  -6   7  -2   39.37    1.35 
   7  -1  -2   40.65    1.60 
  -1  -6  -2   39.28    1.32 
  -6   7  -2   40.62    1.28 
   1   6  -2   41.70    1.25 
   1   6  -2   40.44    1.32 
   7  -1  -2   38.99    1.32 
   1   6   2   41.61    1.23 
  -6   7   2   39.87    1.29 
  -6   7   2   40.58    1.27 
  -1  -6   2   39.55    1.29 
   7  -1   2   39.26    1.65 
   7  -1   2   40.09    1.32 
   6  -7   2   40.11    1.51 
  -7   1   2   38.49    1.38 
   1   6   2   39.16    1.59 
  -5   7  -2  151.13    3.83 
  -5   7  -2  150.01    4.06 
   7  -2  -2  148.31    4.40 
  -7   2  -2  153.44    4.08 
   2   5  -2  148.84    3.72 
   2   5  -2  155.50    4.33 
   2   5  -2  151.77    3.99 
   5  -7  -2  152.40    3.90 
  -2  -5  -2  150.27    4.00 
  -2  -5  -2  154.31    3.87 
   7  -2  -2  149.09    3.96 
   5  -7  -2  147.78    4.38 
  -7   2   2  153.57    4.10 
  -5   7   2  146.43    3.81 
   2   5   2  153.85    3.72 
   2   5   2  149.26    4.46 
   7  -2   2  152.51    3.93 
  -2  -5   2  157.01    4.02 
   5  -7   2  148.07    4.32 
   7  -2   2  146.09    4.45 
  -5   7   2  151.71    3.96 
  -4   7  -2   35.93    1.27 
   3   4  -2   39.09    1.41 
   3   4  -2   36.22    1.24 
  -4   7  -2   38.03    1.21 
  -7   3  -2   36.95    1.28 
   7  -3  -2   35.37    1.43 
   7  -3  -2   36.19    1.19 
  -3  -4  -2   36.83    1.13 
  -3  -4  -2   38.47    1.27 
   4  -7  -2   38.37    1.24 
   4  -7  -2   37.58    1.45 
   3   4  -2   37.37    1.07 
  -4   7   2   37.59    1.20 
  -7   3   2   35.61    1.27 
   4  -7   2   37.08    1.38 
  -4   7   2   38.17    1.17 
   3   4   2   37.71    1.54 
  -3  -4   2   35.74    1.22 
   7  -3   2   37.17    1.15 
   3   4   2   38.25    1.06 
   7  -3   2   39.70    1.51 
  -7   4  -2   21.97    0.69 
  -7   4  -2   19.87    0.86 
   3  -7  -2   20.77    0.99 
   4   3  -2   20.86    0.85 
   7  -4  -2   20.96    0.77 
  -4  -3  -2   21.41    0.76 
   7  -4  -2   20.90    1.00 
  -3   7  -2   21.02    0.82 
  -4  -3  -2   20.42    0.84 
   3  -7  -2   21.02    0.79 
  -3   7  -2   20.67    0.92 
   4   3  -2   22.01    0.99 
   7  -4   2   22.08    0.72 
  -7   4   2   21.77    0.87 
  -4  -3   2   21.04    0.83 
   3  -7   2   21.36    0.94 
   7  -4   2   20.99    1.00 
  -3   7   2   20.61    0.81 
   4   3   2   21.64    1.10 
  -7   4   2   21.00    0.68 
  -2   7  -2  126.79    3.29 
  -5  -2  -2  132.04    3.42 
   7  -5  -2  129.94    3.32 
  -5  -2  -2  124.09    3.44 
  -2   7  -2  123.67    3.58 
   5   2  -2  133.46    3.84 
  -7   5  -2  127.93    3.18 
   7  -5  -2  127.05    3.78 
   5   2  -2  133.72    3.47 
   2  -7  -2  130.65    3.83 
  -7   5  -2  127.79    3.52 
   2  -7  -2  126.86    3.36 
   7  -5   2  128.93    3.80 
  -7   5   2  126.85    3.17 
  -5  -2   2  125.58    3.48 
   5   2   2  123.24    3.95 
   2  -7   2  128.02    3.27 
   2  -7   2  126.37    3.71 
  -7   5   2  125.26    3.48 
  -2   7   2  124.68    3.27 
   6   1  -2   31.55    1.16 
  -7   6  -2   32.65    1.19 
  -1   7  -2   34.12    1.19 
  -1   7  -2   31.95    1.10 
   6   1  -2   33.07    1.40 
   7  -6  -2   33.15    1.02 
  -6  -1  -2   33.38    1.17 
  -6  -1  -2   32.26    1.12 
  -7   6  -2   32.47    1.04 
   7  -6  -2   33.26    1.35 
   1  -7  -2   32.01    1.10 
  -6  -1   2   34.01    1.18 
  -1   7   2   32.57    1.38 
   6   1   2   32.86    1.49 
   1  -7   2   33.25    1.29 
  -1   7   2   30.67    1.08 
  -7   6   2   31.20    1.03 
  -7   6   2   32.12    1.14 
   1  -7   2   31.58    1.04 
   7  -6   2   32.65    1.33 
   0   7  -2   25.72    1.13 
   0   7  -2   26.69    0.96 
   0   7  -2   26.89    1.00 
   7   0  -2   27.40    1.27 
  -7   0  -2   26.57    1.02 
   7  -7  -2   24.61    1.18 
  -7   7  -2   26.30    0.94 
   7   0  -2   25.12    1.01 
  -7   7  -2   25.65    1.04 
   0  -7  -2   25.68    0.98 
  -7   7   2   25.54    0.94 
   7  -7   2   25.78    1.17 
  -7   7   2   26.25    0.99 
   0   7   2   26.93    1.25 
   7   0   2   26.93    1.34 
   7   0   2   26.12    1.01 
  -7   0   2   27.24    1.06 
   0   7   2   26.87    0.95 
  -8   1  -2   62.19    1.96 
  -1  -7  -2   69.31    1.95 
  -7   8  -2   60.98    1.96 
   8  -1  -2   59.66    1.91 
   8  -1  -2   60.40    2.27 
   7  -8  -2   57.84    2.18 
  -7   8  -2   61.78    1.83 
   1   7  -2   62.12    1.80 
   1   7  -2   62.08    2.13 
   7  -8   2   62.56    2.20 
  -7   8   2   59.35    1.88 
  -1  -7   2   61.23    1.88 
   8  -1   2   61.93    1.90 
   1   7   2   59.52    2.24 
   8  -1   2   59.46    2.33 
  -8   1   2   62.85    1.99 
   1   7   2   62.62    1.79 
  -7   8   2   60.34    1.82 
  -2  -6  -2   26.10    1.02 
   8  -2  -2   25.16    0.99 
   6  -8  -2   24.91    1.19 
  -6   8  -2   25.50    0.98 
   8  -2  -2   26.35    1.27 
   2   6  -2   25.44    0.90 
  -6   8  -2   26.47    1.04 
   2   6  -2   24.80    1.13 
  -8   2  -2   25.25    1.04 
  -6   8   2   25.02    0.98 
  -6   8   2   25.18    0.95 
  -2  -6   2   24.38    0.96 
  -8   2   2   26.63    1.07 
   8  -2   2   26.54    1.32 
   2   6   2   25.01    1.24 
  -2  -6   2   24.70    0.98 
   8  -2   2   26.06    0.97 
   2   6   2   26.49    0.90 
   6  -8   2   24.60    1.15 
   5  -8  -2   12.96    0.82 
   8  -3  -2   14.00    0.86 
   3   5  -2   14.57    0.81 
  -5   8  -2   13.65    0.68 
  -5   8  -2   13.68    0.71 
  -8   3  -2   13.26    0.71 
   8  -3  -2   13.19    0.64 
   3   5  -2   12.89    0.69 
  -3  -5  -2   13.44    0.69 
  -8   3   2   12.63    0.69 
  -3  -5   2   13.06    0.64 
   3   5   2   13.67    0.89 
   8  -3   2   13.17    0.87 
   5  -8   2   12.22    0.75 
  -5   8   2   12.72    0.66 
   8  -3   2   13.28    0.61 
  -8   4  -2  105.13    3.09 
   8  -4  -2  110.78    3.41 
   8  -4  -2  105.90    2.93 
   4   4  -2  108.19    3.34 
  -4   8  -2  105.67    2.91 
   4  -8  -2  111.15    3.39 
  -4  -4  -2  110.17    2.94 
  -4  -4  -2  116.47    3.07 
  -4   8  -2  111.25    3.14 
   4   4  -2  109.83    3.05 
   8  -4   2  107.77    3.43 
  -4  -4   2  106.87    3.03 
   8  -4   2  110.51    2.89 
  -4   8   2  108.09    2.91 
  -8   4   2  106.26    3.10 
   4   4   2  107.01    3.49 
   4  -8   2  107.45    3.30 
   5   3  -2   19.41    0.88 
   3  -8  -2   20.78    1.06 
  -8   5  -2   20.29    0.91 
   8  -5  -2   21.52    0.79 
  -5  -3  -2   20.32    0.89 
  -3   8  -2   20.17    0.85 
  -3   8  -2   19.45    0.97 
  -5  -3  -2   19.36    0.79 
   3  -8  -2   21.05    0.82 
   8  -5  -2   20.51    1.05 
   5   3  -2   21.05    1.05 
  -8   5   2   19.58    0.89 
   5   3   2   23.22    1.21 
  -3   8   2   20.74    0.86 
   8  -5   2   20.59    1.06 
  -5  -3   2   20.65    0.86 
   3  -8   2   22.30    1.01 
   6   2  -2   40.01    1.63 
  -8   6  -2   40.84    1.22 
   6   2  -2   40.00    1.40 
  -2   8  -2   40.52    1.34 
  -8   6  -2   39.27    1.42 
   2  -8  -2   38.74    1.30 
  -2   8  -2   40.14    1.45 
  -6  -2  -2   40.30    1.40 
  -6  -2  -2   41.16    1.34 
   2  -8  -2   39.84    1.64 
   8  -6  -2   38.93    1.60 
  -8   6   2   39.87    1.40 
  -8   6   2   40.60    1.22 
   2  -8   2   42.48    1.56 
  -2   8   2   38.81    1.32 
  -6  -2   2   38.99    1.38 
   8  -6   2   39.15    1.60 
   6   2   2   39.05    1.75 
   7   1  -2  131.30    3.99 
   1  -8  -2  125.89    3.45 
   7   1  -2  128.52    3.55 
  -8   7  -2  129.56    3.29 
  -7  -1  -2  128.41    3.52 
   8  -7  -2  130.18    3.93 
  -1   8  -2  126.73    3.34 
  -8   7  -2  127.93    3.60 
  -7  -1  -2  130.32    3.53 
  -7  -1   2  124.21    3.57 
   1  -8   2  128.21    3.83 
   1  -8   2  125.20    3.41 
  -1   8   2  124.92    3.34 
   7   1   2  128.49    4.12 
   8  -7   2  122.77    3.87 
  -8   7   2  128.32    3.28 
  -1   8   2  125.57    3.95 
  -8   7   2  123.26    3.52 
   8  -8  -2   16.50    1.00 
   0   8  -2   16.43    0.78 
   8   0  -2   15.79    1.05 
  -8   8  -2   17.52    0.77 
  -8   0  -2   15.31    0.80 
  -8   0  -2   17.08    0.82 
   0  -8  -2   17.21    0.80 
  -8   8  -2   17.10    0.86 
   8   0  -2   14.58    0.82 
  -8   0   2   17.01    0.86 
   8  -8   2   15.96    0.96 
  -8   8   2   17.23    0.81 
   0   8   2   17.50    1.03 
   8   0   2   15.47    1.10 
   0  -8   2   16.89    0.75 
   0   8   2   16.46    0.78 
   0  -8   2   16.46    0.94 
  -8   8   2   17.03    0.77 
   1   8  -2   14.24    0.89 
  -8   9  -2   14.10    0.74 
  -9   1  -2   12.13    0.76 
   9  -1  -2   14.02    1.02 
   9  -1  -2   13.62    0.79 
  -8   9  -2   15.05    0.82 
   8  -9  -2   14.36    0.97 
  -9   1  -2   13.87    0.76 
  -1  -8  -2   14.26    0.76 
   1   8  -2   11.98    0.69 
   1   8   2   12.40    0.68 
   9  -1   2   13.67    1.08 
  -9   1   2   14.67    0.83 
  -8   9   2   15.05    0.80 
  -1  -8   2   13.23    0.72 
  -8   9   2   12.65    0.74 
   8  -9   2   13.86    0.92 
   1   8   2   14.96    1.01 
   9  -2  -2   20.95    0.95 
   2   7  -2   23.97    1.16 
   2   7  -2   22.37    0.95 
   7  -9  -2   22.04    1.19 
  -7   9  -2   23.12    0.97 
  -7   9  -2   23.69    1.03 
  -9   2  -2   21.06    1.00 
  -2  -7  -2   22.13    0.98 
   9  -2  -2   24.04    1.31 
   9  -2   2   21.63    0.94 
   2   7   2   22.06    1.22 
  -7   9   2   22.71    0.97 
   9  -2   2   22.51    1.32 
  -9   2   2   22.82    1.04 
   7  -9   2   23.40    1.16 
  -2  -7   2   22.53    0.98 
  -9   3  -2   95.64    2.87 
  -6   9  -2   93.04    2.84 
   6  -9  -2   93.26    3.17 
   3   6  -2   99.29    3.08 
  -3  -6  -2  100.46    2.83 
   9  -3  -2   94.38    2.74 
  -6   9  -2   97.06    2.70 
   9  -3  -2   94.71    3.21 
   9  -3   2   95.69    3.26 
   9  -3   2   97.47    2.71 
   6  -9   2   93.58    3.08 
  -3  -6   2   95.99    2.79 
  -6   9   2   99.18    2.71 
   3   6   2   98.88    3.25 
  -3  -6   2   95.71    2.76 
  -9   3   2   95.42    2.88 
  -9   4  -2   13.05    0.73 
   4   5  -2   12.28    0.71 
   9  -4  -2   12.14    0.89 
  -5   9  -2   12.49    0.74 
   9  -4  -2   11.71    0.62 
  -5   9  -2   12.05    0.69 
   4   5  -2   11.02    0.79 
  -4  -5  -2   11.53    0.69 
   5  -9  -2   11.10    0.81 
   9  -4   2   14.01    0.93 
   5  -9   2   12.64    0.81 
   4   5   2   11.56    0.89 
  -4  -5   2   11.63    0.63 
  -9   4   2   11.70    0.73 
  -5   9   2   11.63    0.68 
   4  -9  -2   40.02    1.65 
   9  -5  -2   37.71    1.64 
  -5  -4  -2   39.00    1.39 
   5   4  -2   39.14    1.60 
   9  -5  -2   36.73    1.26 
   5   4  -2   36.32    1.39 
  -9   5  -2   38.22    1.43 
  -4   9  -2   37.64    1.34 
  -5  -4   2   39.90    1.36 
   4  -9   2   38.21    1.54 
  -4   9   2   38.29    1.34 
   9  -5   2   40.45    1.68 
  -9   5   2   39.62    1.43 
   5   4   2   38.75    1.75 
  -6  -3  -2   68.61    2.07 
   3  -9  -2   71.80    2.50 
   6   3  -2   71.13    2.47 
  -9   6  -2   71.14    2.23 
   9  -6  -2   68.39    2.46 
  -3   9  -2   72.04    2.10 
   6   3  -2   67.25    2.17 
  -6  -3  -2   67.63    2.17 
   6   3   2   70.57    2.61 
  -9   6   2   70.44    2.20 
  -3   9   2   69.23    2.08 
   9  -6   2   68.87    2.48 
  -6  -3   2   67.86    2.15 
   3  -9   2   69.05    2.38 
  -7  -2  -2   22.29    0.92 
  -2   9  -2   21.25    0.95 
   7   2  -2   21.64    1.20 
   7   2  -2   21.66    0.99 
   2  -9  -2   22.72    1.19 
  -9   7  -2   21.88    1.02 
   9  -7  -2   21.87    1.20 
  -7  -2  -2   22.58    1.00 
  -9   7   2   22.47    1.00 
   2  -9   2   23.51    1.12 
   9  -7   2   21.27    1.16 
  -7  -2   2   20.61    0.96 
   7   2   2   20.20    1.28 
  -2   9   2   20.85    0.95 
  -9   8  -2   20.16    0.83 
   8   1  -2   18.79    1.14 
  -8  -1  -2   17.18    0.86 
   1  -9  -2   17.38    0.84 
   1  -9  -2   18.78    1.12 
  -9   8  -2   19.11    0.96 
   8   1  -2   18.19    0.93 
   9  -8  -2   19.12    1.13 
  -1   9  -2   17.60    0.86 
  -8  -1  -2   18.13    0.91 
  -9   8   2   17.22    0.80 
  -1   9   2   17.28    0.86 
   9  -8   2   18.12    1.08 
   1  -9   2   19.58    1.05 
  -8  -1   2   18.69    0.92 
   8   1   2   17.83    1.23 
  -9   8   2   19.71    0.92 
  -9   9  -2   73.01    2.14 
   0  -9  -2   71.57    2.23 
   0   9  -2   69.11    2.13 
  -9   0  -2   71.16    2.28 
   9  -9  -2   70.35    2.63 
   9   0  -2   73.67    2.70 
  -9   9  -2   73.12    2.33 
  -9   0  -2   69.81    2.25 
   9   0  -2   72.88    2.30 
  -9   0   2   68.46    2.31 
   0  -9   2   69.54    2.49 
  -9   9   2   72.81    2.26 
   0   9   2   71.60    2.14 
  -9   9   2   71.17    2.13 
   9  -9   2   72.68    2.60 
   0   9   2   69.88    2.64 
  -9  10  -2   16.06    0.93 
  -1  -9  -2   14.83    0.85 
  -9  10  -2   14.96    0.84 
   9 -10  -2   16.55    1.14 
  10  -1  -2   15.24    0.90 
 -10   1  -2   14.69    0.86 
   1   9  -2   16.66    1.03 
  10  -1  -2   15.32    1.16 
 -10   1  -2   16.18    0.92 
  10  -1   2   14.97    1.22 
   1   9   2   17.86    1.16 
   9 -10   2   15.72    1.05 
 -10   1   2   13.83    0.90 
  -9  10   2   16.50    0.87 
 -10   2  -2   74.66    2.39 
 -10   2  -2   69.32    2.24 
  10  -2  -2   70.69    2.29 
  -2  -8  -2   71.69    2.30 
  -8  10  -2   67.88    2.18 
  10  -2  -2   73.00    2.76 
   2   8  -2   74.31    2.57 
   8 -10  -2   71.87    2.68 
  -8  10   2   73.69    2.24 
  -2  -8   2   73.90    2.29 
   2   8   2   73.79    2.72 
 -10   2   2   76.34    2.40 
  10  -2   2   70.59    2.82 
   8 -10   2   72.16    2.61 
   3   7  -2   26.36    1.31 
  -7  10  -2   25.61    1.12 
   7 -10  -2   29.34    1.44 
  10  -3  -2   26.99    1.47 
 -10   3  -2   27.25    1.21 
  -7  10  -2   27.56    1.20 
  10  -3  -2   25.85    1.10 
  -3  -7  -2   27.13    1.17 
  -7  10   2   28.78    1.16 
  -3  -7   2   26.12    1.14 
   7 -10   2   28.11    1.35 
  10  -3   2   27.38    1.09 
   3   7   2   26.79    1.43 
  10  -3   2   25.24    1.49 
 -10   3   2   25.96    1.21 
  10  -4  -2   12.47    0.98 
   4   6  -2   13.57    0.88 
 -10   4  -2   11.44    0.75 
  10  -4  -2   11.08    0.68 
  -4  -6  -2   11.19    0.72 
   6 -10  -2   11.78    0.91 
  -6  10  -2   11.73    0.75 
  -6  10   2   11.71    0.75 
 -10   4   2   12.63    0.80 
   4   6   2   11.89    0.95 
  10  -4   2   12.40    1.00 
  -4  -6   2   10.63    0.71 
   6 -10   2   13.57    0.89 
   5 -10  -2   71.85    2.60 
  -5  10  -2   70.80    2.19 
 -10   5  -2   70.79    2.33 
   5   5  -2   72.74    2.30 
  10  -5  -2   78.35    2.70 
  -5  -5  -2   69.71    2.28 
   5   5  -2   74.86    2.56 
 -10   5   2   71.01    2.33 
  -5  -5   2   72.28    2.22 
  10  -5   2   70.31    2.65 
   5 -10   2   69.38    2.50 
  -5  10   2   68.65    2.17 
   5   5   2   71.10    2.70 
 -10   6  -2   20.04    1.03 
  10  -6  -2   19.89    1.20 
   4 -10  -2   22.53    1.23 
   6   4  -2   20.55    1.15 
  -4  10  -2   19.07    0.96 
   6   4  -2   19.64    1.01 
  -6  -4  -2   21.97    1.00 
   6   4   2   19.11    1.26 
  -4  10   2   18.91    0.96 
   4 -10   2   19.88    1.10 
 -10   6   2   20.71    1.03 
  -6  -4   2   20.83    0.95 
  10  -6   2   20.33    1.21 
   7   3  -2    4.00    0.51 
  -7  -3  -2    3.59    0.42 
 -10   7  -2    3.98    0.53 
  -7  -3  -2    3.15    0.47 
   3 -10  -2    3.98    0.63 
  -3  10  -2    3.89    0.49 
  10  -7  -2    3.81    0.61 
   7   3  -2    3.15    0.56 
  -7  -3   2    4.79    0.50 
   7   3   2    2.62    0.59 
   3 -10   2    3.51    0.56 
  -3  10   2    3.46    0.49 
  10  -7   2    4.48    0.66 
 -10   7   2    2.92    0.46 
   2 -10  -2   61.91    2.38 
   8   2  -2   60.27    2.36 
  10  -8  -2   57.49    2.35 
  -8  -2  -2   62.10    1.99 
  -8  -2  -2   59.05    2.03 
  -2  10  -2   61.17    1.94 
   8   2  -2   63.71    2.08 
 -10   8  -2   62.37    2.11 
  -8  -2   2   59.76    2.04 
 -10   8   2   60.39    2.04 
   2 -10   2   58.53    2.23 
  10  -8   2   58.96    2.34 
   8   2   2   61.47    2.55 
  10  -9  -2   11.81    0.99 
  -1  10  -2    9.60    0.72 
   1 -10  -2   10.71    0.92 
   9   1  -2   11.37    0.97 
  -9  -1  -2   11.19    0.77 
 -10   9  -2   10.05    0.78 
   9   1  -2    9.84    0.77 
  -9  -1  -2   11.01    0.72 
  10  -9   2    9.58    0.87 
  -1  10   2   11.09    0.73 
  -9  -1   2   11.27    0.77 
 -10   9   2   10.86    0.76 
   9   1   2    9.17    1.02 
   1 -10   2   10.27    0.83 
  10 -10  -2   18.74    1.25 
   0  10  -2   17.52    0.91 
 -10  10  -2   19.05    1.04 
 -10   0  -2   17.51    0.98 
 -10  10  -2   16.84    0.89 
  10   0  -2   17.09    0.99 
 -10   0  -2   17.15    0.95 
  10   0  -2   16.14    1.23 
   0 -10  -2   17.52    1.18 
 -10  10   2   16.78    0.91 
   0 -10   2   14.20    1.04 
 -10   0   2   17.07    1.00 
   0  10   2   16.25    0.92 
  10 -10   2   17.55    1.18 
  10   0   2   18.12    1.38 
   0  10   2   16.55    1.19 
  11  -1  -2   51.71    1.88 
 -11   1  -2   46.72    1.79 
 -10  11  -2   48.62    1.74 
 -10  11  -2   49.87    1.90 
 -11   1  -2   49.02    1.88 
  10 -11  -2   50.66    2.24 
  -1 -10  -2   48.69    1.82 
  -1 -10   2   47.90    2.03 
  11  -1   2   50.35    2.42 
  10 -11   2   49.03    2.16 
 -10  11   2   51.24    1.79 
 -11   1   2   50.39    1.93 
   1  10   2   49.98    2.21 
 -11   2  -2   13.76    0.82 
  -2  -9  -2   13.09    0.84 
 -11   2  -2   12.74    0.88 
   9 -11  -2   13.38    1.08 
   2   9  -2   11.69    0.94 
  11  -2  -2   11.76    0.83 
  11  -2  -2   10.58    1.09 
  -9  11  -2   11.02    0.82 
 -11   2   2   11.74    0.89 
  11  -2   2   13.18    1.22 
  -9  11   2   13.64    0.86 
   9 -11   2   12.88    1.03 
   2   9   2   13.03    1.08 
  -2  -9   2   12.95    0.80 
 -11   3  -2   25.01    1.22 
   3   8  -2   23.86    1.36 
  11  -3  -2   23.46    1.46 
  11  -3  -2   24.21    1.13 
  -3  -8  -2   24.13    1.15 
  -8  11  -2   24.39    1.14 
   8 -11  -2   23.92    1.42 
  -3  -8   2   24.10    1.13 
  -8  11   2   24.40    1.15 
 -11   3   2   24.28    1.21 
   3   8   2   22.12    1.37 
   8 -11   2   24.94    1.36 
  11  -3   2   23.41    1.54 
 -11   4  -2   51.15    1.89 
   4   7  -2   52.78    2.04 
  -7  11  -2   49.34    1.75 
   7 -11  -2   53.10    2.18 
  11  -4  -2   49.27    2.20 
  11  -4  -2   48.70    1.72 
  -4  -7  -2   53.56    1.86 
  11  -4   2   48.95    2.26 
  -4  -7   2   48.80    1.81 
  -7  11   2   48.51    1.73 
 -11   4   2   50.52    1.88 
   4   7   2   51.64    2.19 
   7 -11   2   51.05    2.06 
  11  -5  -2   19.97    1.32 
   6 -11  -2   21.71    1.28 
  -5  -6  -2   21.10    1.06 
  -6  11  -2   21.33    1.04 
   5   6  -2   20.88    1.21 
 -11   5  -2   22.21    1.12 
  11  -5   2   19.27    1.33 
   6 -11   2   20.19    1.17 
  -6  11   2   21.82    1.07 
 -11   5   2   21.16    1.12 
  -5  -6   2   20.67    1.04 
   5   6   2   20.90    1.33 
  -5  11  -2   22.03    1.07 
   5 -11  -2   21.89    1.30 
  11  -6  -2   22.27    1.37 
  -6  -5  -2   22.66    1.10 
   6   5  -2   21.68    1.13 
 -11   6  -2   20.86    1.12 
   6   5  -2   21.69    1.23 
  -5  11   2   20.23    1.05 
   5 -11   2   21.56    1.21 
  -6  -5   2   22.39    1.02 
  11  -6   2   21.89    1.37 
 -11   6   2   20.75    1.11 
   6   5   2   20.16    1.35 
  11  -7  -2   64.62    2.58 
  -7  -4  -2   65.43    2.22 
   7   4  -2   65.79    2.49 
   7   4  -2   64.61    2.22 
 -11   7  -2   66.18    2.27 
  -4  11  -2   62.88    2.10 
   4 -11  -2   65.41    2.54 
  11  -7   2   63.22    2.54 
  -7  -4   2   66.73    2.16 
  -4  11   2   67.32    2.10 
   7   4   2   63.82    2.66 
   4 -11   2   64.26    2.42 
 -11   7   2   65.73    2.24 
 -11   8  -2   17.36    1.03 
  -8  -3  -2   15.70    0.94 
   8   3  -2   16.19    0.98 
  11  -8  -2   17.03    1.22 
  -3  11  -2   16.49    0.95 
   3 -11  -2   18.35    1.19 
   8   3  -2   17.28    1.15 
  11  -8   2   17.34    1.19 
  -8  -3   2   16.44    0.94 
   3 -11   2   17.68    1.10 
  -3  11   2   18.71    0.99 
   8   3   2   15.56    1.25 
 -11   8   2   16.14    0.97 
  11  -9  -2   19.49    1.33 
   9   2  -2   18.84    1.26 
 -11   9  -2   21.18    1.13 
   2 -11  -2   19.51    1.27 
  -2  11  -2   19.55    1.04 
   9   2  -2   22.41    1.15 
  -9  -2  -2   20.22    1.08 
  -9  -2  -2   21.65    1.03 
  11  -9   2   23.90    1.39 
  -9  -2   2   21.74    1.09 
 -11   9   2   20.15    1.07 
   2 -11   2   19.00    1.20 
  -2  11   2   17.96    1.02 
   9   2   2   20.21    1.42 
 -10  -1  -2   50.96    1.86 
   1 -11  -2   48.44    2.16 
  -1  11  -2   49.83    1.77 
 -11  10  -2   52.01    1.93 
  10   1  -2   49.14    1.89 
 -10  -1  -2   50.20    1.82 
  11 -10  -2   46.43    2.18 
  10   1  -2   49.45    2.22 
 -10  -1   2   47.69    1.86 
  11 -10   2   45.85    2.15 
  -1  11   2   48.98    1.77 
   1 -11   2   48.46    2.04 
  10   1   2   50.07    2.40 
 -11  11  -2   19.60    1.14 
   0 -11  -2   17.79    1.25 
  11 -11  -2   17.74    1.37 
 -11   0  -2   19.17    1.11 
  11   0  -2   18.24    1.12 
  11   0  -2   19.27    1.49 
 -11   0  -2   20.15    1.09 
   0 -11   2   18.32    1.20 
 -11   0   2   19.77    1.12 
  11 -11   2   18.40    1.31 
  11   0   2   20.34    1.53 
 -12   1  -2   10.25    0.87 
  12  -1  -2   12.79    1.09 
 -12   1  -2   11.54    1.00 
  -1 -11   2   11.67    1.02 
 -11  12   2   11.82    0.97 
   2  10  -2    3.86    0.68 
 -12   2  -2    5.03    0.67 
 -10  12  -2    4.62    0.63 
  12  -2  -2    5.07    0.65 
  10 -12  -2    6.53    0.90 
  -2 -10  -2    4.71    0.62 
  12  -2  -2    5.94    0.96 
 -12   2   2    5.30    0.72 
 -10  12   2    4.90    0.63 
   2  10   2    3.67    0.73 
  12  -2   2    5.24    0.96 
  10 -12   2    3.98    0.73 
  -3  -9  -2   44.73    1.77 
  12  -3  -2   48.84    1.75 
   3   9  -2   44.72    1.97 
  -9  12  -2   44.97    1.72 
 -12   3  -2   46.56    1.83 
  12  -3  -2   43.80    2.21 
   9 -12  -2   45.37    2.12 
  -3  -9   2   45.71    1.74 
 -12   3   2   45.62    1.85 
  -9  12   2   44.65    1.73 
  12  -3   2   41.09    2.24 
   9 -12   2   43.72    2.04 
   3   9   2   46.60    2.19 
  12  -4  -2    4.93    0.91 
   8 -12  -2    8.29    1.00 
  -8  12  -2    6.42    0.70 
   4   8  -2    7.45    0.82 
 -12   4  -2    8.29    0.78 
  -4  -8  -2    6.58    0.70 
   8 -12   2    7.96    0.85 
  -8  12   2    6.68    0.72 
  -4  -8   2    6.82    0.69 
  12  -4   2    8.24    1.08 
   4   8   2    7.86    0.92 
 -12   4   2    8.43    0.80 
  12  -5  -2    9.94    1.08 
   5   7  -2   11.26    0.93 
 -12   5  -2    9.80    0.84 
  -5  -7  -2    9.33    0.80 
  -7  12  -2    9.07    0.80 
   7 -12  -2    8.37    0.94 
   7 -12   2    9.51    0.88 
  -5  -7   2   10.83    0.83 
  12  -5   2   10.08    1.09 
  -7  12   2    9.55    0.82 
 -12   5   2    9.57    0.85 
   5   7   2   10.32    1.02 
  -6  -6  -2   64.25    2.20 
 -12   6  -2   58.98    2.21 
  -6  12  -2   59.73    2.08 
   6   6  -2   60.72    2.40 
  12  -6  -2   61.53    2.61 
   6 -12  -2   62.58    2.53 
   6 -12   2   60.39    2.41 
  -6  12   2   60.97    2.10 
   6   6   2   62.88    2.60 
 -12   6   2   62.25    2.25 
  -6  -6   2   64.05    2.20 
  12  -6   2   58.80    2.57 
  -5  12  -2   13.00    0.92 
 -12   7  -2   13.51    0.97 
  -7  -5  -2   11.39    0.87 
  12  -7  -2   13.12    1.19 
   7   5  -2   12.28    1.00 
   5 -12  -2   13.17    1.08 
 -12   7   2   14.57    0.98 
  12  -7   2   13.98    1.20 
   5 -12   2   13.21    1.01 
  -5  12   2   13.51    0.94 
  -7  -5   2   13.64    0.91 
   7   5   2   13.28    1.17 
   4 -12  -2   18.40    1.26 
  -8  -4  -2   15.91    1.02 
  -4  12  -2   17.90    1.05 
   8   4  -2   18.49    1.12 
 -12   8  -2   17.78    1.10 
   8   4  -2   17.43    1.21 
  12  -8  -2   16.01    1.28 
 -12   8   2   18.98    1.09 
  -4  12   2   18.78    1.07 
  12  -8   2   14.29    1.22 
   4 -12   2   17.33    1.16 
   8   4   2   18.23    1.36 
  -8  -4   2   18.41    1.01 
  -3  12  -2   41.92    1.69 
   9   3  -2   45.05    1.81 
  -9  -3  -2   43.84    1.80 
  12  -9  -2   45.30    2.17 
 -12   9  -2   50.07    1.89 
   3 -12  -2   41.52    2.09 
   9   3  -2   39.96    2.16 
  -3  12   2   46.87    1.76 
  -9  -3   2   43.87    1.73 
   3 -12   2   45.09    1.98 
   9   3   2   44.19    2.22 
 -12   9   2   46.02    1.80 
  12  -9   2   44.06    2.12 
  -2  12  -2   10.47    0.87 
 -10  -2  -2    9.94    0.83 
 -12  10  -2   12.23    0.95 
  10   2  -2   11.53    0.95 
  12 -10  -2   11.68    1.15 
   2 -12  -2   11.52    1.09 
   2 -12   2   12.37    1.02 
  10   2   2   11.31    1.20 
 -10  -2   2   10.75    0.86 
  -2  12   2   12.03    0.91 
 -12  10   2   11.00    0.89 
  12 -10   2    9.72    1.08 
 -12  11  -2    6.23    0.77 
 -11  -1  -2    6.58    0.72 
  -1  12  -2    5.63    0.68 
 -11  -1   2    4.98    0.75 
  -1  12   2    4.74    0.66 
   1 -12   2    5.89    0.82 
   3  10  -2   10.25    1.15 
  13  -4  -2   10.37    1.22 
   4   9  -2   10.68    0.99 
  -4  -9   2   11.38    0.87 
  -5  -8  -2   43.34    1.86 
  13  -5  -2   44.75    2.28 
   5   8  -2   38.72    1.93 
  -5  -8   2   44.81    1.79 
   5   8   2   43.44    2.12 
  13  -6  -2    9.59    1.11 
   7 -13   2    8.94    1.01 
  13  -6   2   10.06    1.20 
  -6  -7   2    9.77    0.84 
   6   7   2    7.72    1.05 
  13  -7  -2    9.06    1.14 
 -13   7   2    9.77    0.94 
   6 -13   2    9.43    0.94 
  13  -7   2    8.11    1.16 
   7   6   2    9.91    1.10 
  13  -8  -2   42.25    2.16 
   5 -13   2   43.80    2.20 
 -13   8   2   42.39    1.82 
   8   5   2   40.77    2.16 
 -13   9   2    9.34    0.93 
   0   0  -3   -0.16    0.10 
   0   0  -3   -0.25    0.08 
   0   0   3   -0.06    0.10 
   0   0   3   -0.23    0.06 
  -1   1  -3  197.24    4.96 
   0  -1  -3  205.36    4.92 
  -1   0  -3  204.26    4.92 
   1  -1  -3  202.58    4.91 
   1  -1  -3  203.95    5.11 
   0  -1  -3  197.77    4.89 
  -1   0  -3  198.83    4.86 
   0   1  -3  200.37    4.85 
   1   0  -3  201.27    4.97 
   1   0  -3  195.28    4.88 
  -1   1  -3  198.02    4.85 
   1  -1  -3  196.12    4.93 
   0   1  -3  189.02    5.03 
   1   0   3  198.19    5.19 
   1   0   3  200.14    4.69 
  -1   1   3  200.33    4.66 
   1  -1   3  191.86    4.65 
  -1   0   3  191.65    4.69 
   0  -1   3  203.60    5.07 
   1  -1   3  202.33    5.12 
   0   1   3  201.86    4.65 
   0  -1   3  194.20    4.65 
   0   1   3  194.15    5.18 
   1   1  -3    0.63    0.15 
  -2   1  -3    1.14    0.15 
  -1  -1  -3    0.97    0.11 
   1   1  -3    1.00    0.14 
  -1   2  -3    1.11    0.10 
   2  -1  -3    1.26    0.17 
  -1  -1  -3    0.99    0.14 
   1  -2  -3    0.98    0.16 
  -2   1  -3    1.14    0.13 
   1   1  -3    1.10    0.12 
   2  -1  -3    1.29    0.14 
  -1   2  -3    1.29    0.15 
  -1   2  -3    0.98    0.18 
  -1   2   3    1.14    0.15 
  -1  -1   3    0.94    0.13 
   2  -1   3    1.37    0.19 
  -1   2   3    1.01    0.16 
   1   1   3    0.87    0.20 
   2  -1   3    1.10    0.14 
   1  -2   3    0.95    0.12 
  -2   1   3    1.05    0.15 
   1   1   3    1.22    0.14 
  -2   1   3    0.95    0.13 
  -2   2  -3  257.60    6.06 
  -2   2  -3  260.01    6.27 
  -2   0  -3  263.26    6.43 
  -2   0  -3  260.60    6.34 
   2  -2  -3  256.67    6.41 
   2   0  -3  259.32    6.36 
   0  -2  -3  271.81    6.38 
   0   2  -3  265.36    6.07 
   0   2  -3  259.70    6.31 
   2   0  -3  263.09    6.70 
   0   2  -3  236.44    6.56 
   2  -2  -3  262.61    6.73 
  -2   2  -3  253.46    6.48 
  -2   2   3  269.17    6.42 
   0  -2   3  260.92    6.68 
   2  -2   3  264.33    6.07 
   2   0   3  258.57    6.06 
  -2   0   3  252.57    6.48 
   2   0   3  259.95    6.83 
   0  -2   3  257.68    6.07 
   0   2   3  257.61    6.06 
  -2   0   3  254.67    6.08 
   2  -2   3  266.58    6.74 
  -2   2   3  260.92    6.07 
   0   2   3  263.09    6.82 
   2  -3  -3   38.23    1.21 
   1   2  -3   39.17    1.18 
   1   2  -3   39.03    1.08 
   3  -1  -3   39.16    1.16 
  -1  -2  -3   38.38    1.11 
  -2   3  -3   38.55    1.06 
   1   2  -3   38.03    1.13 
   3  -1  -3   38.61    1.11 
  -3   1  -3   37.79    1.05 
  -3   1  -3   37.34    1.11 
  -2   3  -3   36.73    1.14 
   2  -3  -3   38.28    1.16 
  -2   3   3   38.15    1.06 
   3  -1   3   38.91    1.01 
  -1  -2   3   36.49    1.03 
  -3   1   3   37.60    1.12 
   3  -1   3   39.82    1.25 
   1   2   3   39.27    1.02 
   2  -3   3   38.56    1.17 
  -2   3   3   39.14    1.03 
  -3   1   3   38.09    1.00 
   2   1  -3  159.63    4.17 
  -2  -1  -3  160.79    3.94 
   1  -3  -3  154.68    3.96 
   3  -2  -3  164.85    4.19 
   2   1  -3  156.26    3.94 
  -2  -1  -3  154.43    3.94 
  -1   3  -3  158.92    3.78 
   3  -2  -3  159.99    3.95 
  -3   2  -3  143.85    3.84 
  -1   3  -3  161.81    3.85 
  -3   2  -3  154.15    4.02 
  -1   3  -3  156.60    4.12 
   2   1   3  154.21    4.34 
   2   1   3  159.65    3.70 
   1  -3   3  156.36    4.16 
  -1   3   3  159.17    4.26 
  -3   2   3  155.91    3.73 
  -1   3   3  161.09    3.78 
   3  -2   3  162.73    3.75 
   3  -2   3  159.34    4.23 
  -2  -1   3  154.78    3.73 
  -3   2   3  157.20    3.99 
  -2  -1   3  154.06    4.03 
   0  -3  -3    0.22    0.12 
   3  -3  -3    0.19    0.12 
   0   3  -3    0.93    0.20 
  -3   0  -3    0.03    0.10 
   3  -3  -3    0.23    0.13 
   0   3  -3    0.38    0.12 
  -3   3  -3    0.21    0.11 
  -3   0  -3    0.25    0.11 
  -3   3  -3    0.18    0.12 
   3   0  -3    0.13    0.11 
   0   3  -3    0.18    0.09 
   3   0  -3    0.30    0.15 
   0   3  -3    0.21    0.11 
   3  -3   3    0.14    0.12 
  -3   3   3    0.17    0.11 
  -3   0   3    0.12    0.10 
   0   3   3   -0.09    0.13 
  -3   3   3    0.07    0.09 
   3   0   3    0.18    0.17 
   3   0   3    0.11    0.08 
  -3   0   3    0.09    0.12 
   0   3   3    0.25    0.11 
   1   3  -3  113.55    2.73 
   3  -4  -3  110.39    3.12 
  -3   4  -3  108.57    2.75 
  -3   4  -3  109.76    2.95 
   4  -1  -3  108.87    3.09 
   1   3  -3  111.11    3.04 
   1   3  -3  120.87    2.98 
  -4   1  -3  110.54    2.84 
   4  -1  -3  116.47    2.89 
   1   3  -3  111.65    2.86 
  -4   1  -3  116.12    2.93 
  -1  -3  -3  107.05    2.88 
   3  -4  -3  109.33    2.93 
   4  -1   3  110.24    3.19 
  -4   1   3  113.58    2.65 
  -4   1   3  110.14    2.95 
   3  -4   3  109.52    3.09 
   1   3   3  101.12    2.71 
  -3   4   3  109.45    2.76 
  -3   4   3  111.87    2.84 
   4  -1   3  113.76    2.69 
   1   3   3  105.26    3.21 
   2   2  -3    5.52    0.34 
  -4   2  -3    4.69    0.24 
  -2  -2  -3    4.65    0.30 
   4  -2  -3    4.86    0.34 
   2  -4  -3    4.56    0.36 
  -2   4  -3    5.01    0.35 
  -2   4  -3    4.98    0.19 
   4  -2  -3    5.04    0.30 
  -4   2  -3    4.53    0.30 
   2   2  -3    5.23    0.33 
  -2   4  -3    4.28    0.29 
  -2  -2  -3    5.12    0.24 
   2  -4  -3    4.54    0.31 
   2   2  -3    4.98    0.31 
   2   2   3    5.11    0.25 
   4  -2   3    5.04    0.24 
  -4   2   3    4.95    0.25 
  -2  -2   3    4.91    0.25 
  -2   4   3    5.47    0.31 
  -4   2   3    5.35    0.32 
   4  -2   3    4.80    0.35 
   2   2   3    5.37    0.43 
   2  -4   3    5.19    0.33 
  -3  -1  -3  202.63    5.17 
  -1   4  -3  215.55    5.07 
  -4   3  -3  207.96    4.90 
   4  -3  -3  209.36    5.52 
   3   1  -3  212.98    5.53 
  -4   3  -3  203.82    5.27 
  -4   3  -3  204.33    5.02 
  -1   4  -3  201.53    5.40 
  -3  -1  -3  210.84    5.19 
  -1   4  -3  202.44    4.94 
   4  -3  -3  207.81    5.16 
   1  -4  -3  206.45    5.17 
   3   1   3  212.00    4.82 
  -4   3   3  206.73    4.90 
   1  -4   3  204.76    5.47 
  -3  -1   3  212.61    4.88 
  -1   4   3  206.54    4.94 
  -1   4   3  209.69    5.61 
  -3  -1   3  205.52    5.27 
   4  -3   3  205.54    5.54 
   3   1   3  194.32    5.66 
  -4   3   3  204.93    5.23 
  -4   4  -3  166.76    4.46 
   4   0  -3  176.56    4.71 
  -4   0  -3  171.50    4.36 
  -4   4  -3  170.81    4.16 
   0   4  -3  181.83    4.32 
   0  -4  -3  173.21    4.38 
  -4   0  -3  171.74    4.41 
   0   4  -3  167.19    4.53 
   0   4  -3  171.43    4.63 
   4  -4  -3  170.69    4.70 
   4  -4  -3  178.77    4.37 
   0   4  -3  170.18    4.16 
  -4   0   3  177.91    4.06 
  -4   0   3  168.25    4.46 
  -4   4   3  172.33    4.38 
   0   4   3  177.54    4.16 
   4   0   3  168.64    4.82 
   4   0   3  171.82    4.02 
   4  -4   3  170.88    4.69 
   0   4   3  171.60    4.79 
  -4   4   3  169.95    4.16 
  -4   5  -3    0.64    0.17 
  -5   1  -3    0.44    0.15 
   1   4  -3    0.71    0.18 
   5  -1  -3    0.53    0.19 
   4  -5  -3    0.26    0.15 
  -4   5  -3    0.43    0.16 
   1   4  -3    0.58    0.14 
  -5   1  -3    0.65    0.16 
  -1  -4  -3    0.54    0.16 
   4  -5  -3    0.38    0.18 
   1   4  -3    0.49    0.15 
   5  -1  -3    0.44    0.16 
   1   4  -3    0.45    0.16 
  -5   1   3    0.47    0.10 
   5  -1   3    0.30    0.20 
   1   4   3    0.47    0.23 
   1   4   3    0.47    0.14 
  -4   5   3    0.52    0.13 
  -4   5   3    0.67    0.17 
   4  -5   3    0.44    0.17 
  -5   1   3    0.38    0.15 
   5  -1   3    0.52    0.11 
  -2  -3  -3  157.51    4.07 
   2   3  -3  156.54    4.15 
   2   3  -3  159.70    4.06 
   3  -5  -3  163.66    4.11 
  -5   2  -3  159.09    4.14 
   5  -2  -3  160.12    4.05 
   2   3  -3  158.71    3.81 
  -2  -3  -3  163.75    3.99 
  -3   5  -3  157.39    3.90 
   3  -5  -3  130.36    4.37 
   5  -2  -3  160.84    4.38 
   2   3  -3  170.28    4.34 
  -3   5  -3  152.93    4.16 
  -5   2  -3  157.37    3.98 
  -3   5   3  158.30    3.89 
   5  -2   3  156.85    3.76 
  -5   2   3  163.38    3.76 
   2   3   3  162.95    3.80 
   5  -2   3  162.03    4.45 
   2   3   3  151.19    4.52 
  -5   2   3  158.87    4.15 
  -3   5   3  164.99    4.00 
  -5   3  -3  133.65    3.34 
  -3  -2  -3  134.03    3.49 
  -3  -2  -3  137.37    3.43 
   2  -5  -3  132.44    3.46 
   2  -5  -3  136.36    3.82 
  -2   5  -3  129.12    3.32 
   3   2  -3  140.03    3.74 
   5  -3  -3  132.99    3.74 
   5  -3  -3  133.17    3.44 
   3   2  -3  130.21    3.47 
  -5   3  -3  129.57    3.54 
  -2   5  -3  130.62    3.63 
  -5   3  -3  134.06    3.23 
  -3  -2   3  130.14    3.53 
   3   2   3  126.13    3.90 
   2  -5   3  135.06    3.31 
  -5   3   3  135.59    3.24 
  -2   5   3  133.66    3.33 
   5  -3   3  131.76    3.77 
  -3  -2   3  131.73    3.21 
   3   2   3  145.36    3.21 
   2  -5   3  134.62    3.70 
  -5   3   3  135.44    3.53 
  -1   5  -3    2.84    0.28 
  -5   4  -3    3.07    0.17 
  -1   5  -3    3.80    0.38 
  -4  -1  -3    3.25    0.26 
  -5   4  -3    3.67    0.32 
  -5   4  -3    3.13    0.25 
  -1   5  -3    3.37    0.23 
   5  -4  -3    3.20    0.27 
  -4  -1  -3    2.89    0.28 
   4   1  -3    3.06    0.34 
   4   1  -3    3.23    0.29 
   1  -5  -3    3.28    0.28 
  -1   5   3    3.79    0.38 
   4   1   3    3.64    0.17 
   4   1   3    3.61    0.43 
   5  -4   3    3.11    0.33 
  -1   5   3    3.29    0.27 
   1  -5   3    3.60    0.31 
  -4  -1   3    3.55    0.24 
  -4  -1   3    3.36    0.31 
  -5   4   3    3.20    0.26 
  -5   4   3    3.24    0.28 
   0   5  -3   89.78    2.62 
  -5   5  -3   90.83    2.59 
   5   0  -3   94.09    2.80 
   5   0  -3   95.08    2.54 
   0   5  -3   95.31    2.47 
  -5   5  -3   91.87    2.39 
  -5   0  -3   91.11    2.53 
   0  -5  -3   94.34    2.53 
   5  -5  -3   96.87    2.80 
   0   5  -3   93.12    2.71 
   5  -5  -3   95.51    2.49 
  -5   0  -3   92.29    2.52 
   0   5  -3   93.17    2.40 
   5   0   3   92.02    2.92 
   5  -5   3   92.05    2.76 
   0   5   3   93.48    2.40 
  -5   5   3   92.31    2.40 
  -5   0   3   91.47    2.60 
  -5   0   3   94.18    2.22 
  -5   5   3   91.62    2.51 
   0   5   3   92.93    2.87 
   6  -1  -3   88.91    2.49 
  -6   1  -3   89.69    2.52 
   1   5  -3   92.93    2.72 
   1   5  -3   90.66    2.56 
   1   5  -3   90.32    2.34 
  -6   1  -3   90.71    2.46 
   5  -6  -3   90.89    2.78 
  -5   6  -3   90.29    2.56 
   1   5  -3   91.08    2.46 
   6  -1  -3   93.61    2.79 
   5  -6  -3   94.69    2.46 
  -1  -5  -3   80.54    2.48 
  -5   6  -3   92.96    2.39 
  -5   6   3   89.53    2.38 
   5  -6   3   88.77    2.72 
   1   5   3   89.26    2.85 
   1   5   3   89.33    2.34 
  -6   1   3   88.45    2.56 
  -5   6   3   91.00    2.45 
   6  -1   3   86.73    2.89 
   6  -2  -3   99.98    2.98 
  -4   6  -3   98.94    2.60 
  -2  -4  -3  101.32    2.57 
   4  -6  -3  100.02    2.99 
  -2  -4  -3   97.01    2.71 
  -4   6  -3   97.31    2.77 
   2   4  -3  102.82    2.71 
   6  -2  -3   96.92    2.68 
   2   4  -3  100.26    2.90 
   4  -6  -3   98.63    2.73 
   2   4  -3  100.95    2.52 
  -6   2  -3  101.78    2.64 
  -6   2  -3   99.69    2.76 
   2   4  -3   98.67    2.75 
   6  -2   3   99.60    3.05 
   2   4   3   96.07    3.09 
   2   4   3  100.11    2.50 
  -6   2   3  100.05    2.78 
  -6   2   3  100.27    2.41 
   6  -2   3   99.35    2.43 
  -4   6   3   97.45    2.59 
   4  -6   3  100.26    2.94 
  -4   6   3  101.13    2.63 
  -3  -3  -3   -0.13    0.12 
   6  -3  -3   -0.02    0.15 
   3   3  -3   -0.06    0.12 
  -3  -3  -3    0.07    0.09 
   3  -6  -3    0.14    0.16 
  -3   6  -3   -0.04    0.13 
   3  -6  -3   -0.10    0.11 
  -6   3  -3   -0.03    0.10 
  -6   3  -3   -0.08    0.11 
   3   3  -3   -0.24    0.13 
   6  -3  -3   -0.14    0.11 
  -3   6  -3    0.03    0.14 
   3  -6   3   -0.03    0.12 
   6  -3   3    0.01    0.15 
   3   3   3    0.06    0.09 
  -6   3   3   -0.01    0.10 
  -3  -3   3    0.15    0.10 
  -3  -3   3    0.11    0.13 
  -3   6   3   -0.06    0.12 
   3  -6   3    0.08    0.06 
  -6   3   3   -0.07    0.13 
   3   3   3    0.38    0.22 
   6  -3   3   -0.01    0.08 
  -3   6   3   -0.06    0.09 
  -6   4  -3   66.98    1.75 
   2  -6  -3   66.91    1.90 
   6  -4  -3   68.16    1.87 
  -2   6  -3   67.50    2.11 
   6  -4  -3   66.59    2.13 
   4   2  -3   67.22    1.94 
  -4  -2  -3   68.14    1.86 
  -6   4  -3   67.44    1.75 
  -6   4  -3   65.49    1.97 
  -4  -2  -3   65.60    1.92 
   2  -6  -3   66.82    2.20 
   4   2  -3   69.79    2.13 
  -2   6  -3   67.55    1.86 
  -6   4   3   65.01    1.93 
   6  -4   3   65.11    2.15 
  -6   4   3   66.74    1.75 
  -2   6   3   64.32    1.83 
   2  -6   3   68.62    1.76 
   4   2   3   65.61    2.30 
   2  -6   3   66.42    2.07 
  -4  -2   3   65.44    1.96 
  -4  -2   3   67.73    1.70 
  -5  -1  -3   74.71    2.07 
  -1   6  -3   73.92    2.01 
  -6   5  -3   73.59    2.15 
   1  -6  -3   74.73    2.05 
   5   1  -3   76.78    2.36 
  -5  -1  -3   70.62    2.09 
  -6   5  -3   74.06    1.94 
   6  -5  -3   74.65    2.02 
   6  -5  -3   70.55    2.30 
  -1   6  -3   71.89    2.22 
   5   1  -3   71.14    2.10 
  -1   6   3   72.08    1.99 
  -5  -1   3   70.52    2.13 
   1  -6   3   73.40    1.97 
   6  -5   3   74.42    2.32 
   1  -6   3   73.47    2.25 
  -6   5   3   71.55    1.93 
   5   1   3   72.92    2.48 
  -1   6   3   75.78    2.41 
  -6   5   3   70.53    2.07 
   6   0  -3    0.14    0.15 
  -6   6  -3    0.29    0.16 
   6   0  -3    0.26    0.22 
   0   6  -3    0.20    0.16 
   6  -6  -3    0.30    0.22 
   0   6  -3    0.22    0.14 
  -6   0  -3    0.16    0.14 
   0  -6  -3    0.16    0.14 
  -6   6  -3    0.07    0.15 
   6  -6  -3    0.32    0.14 
   0   6  -3    0.45    0.19 
  -6   0  -3    0.16    0.15 
   0   6  -3    0.31    0.16 
   6  -6   3    0.25    0.17 
   0   6   3    0.30    0.20 
   6   0   3    0.56    0.28 
  -6   6   3    0.29    0.15 
   0   6   3    0.32    0.16 
  -6   0   3    0.36    0.18 
  -6   6   3    0.24    0.16 
   1   6  -3   99.54    2.81 
   6  -7  -3  104.35    3.12 
  -6   7  -3  100.79    2.65 
  -7   1  -3   97.42    2.80 
   1   6  -3   98.39    2.59 
   7  -1  -3   99.96    3.11 
  -6   7  -3   97.26    2.84 
   1   6  -3   99.30    2.98 
   7  -1  -3  100.70    2.78 
   1   6  -3   99.71    2.72 
   6  -7  -3  101.59    2.66 
  -1  -6  -3  100.75    2.78 
  -7   1  -3   99.50    2.73 
  -6   7   3   98.05    2.64 
  -7   1   3   96.08    2.83 
  -6   7   3   97.52    2.71 
   7  -1   3   97.91    3.22 
   1   6   3   98.10    3.17 
   1   6   3   96.98    2.58 
   6  -7   3   92.95    3.01 
   2   5  -3    0.40    0.18 
   2   5  -3    0.58    0.17 
  -5   7  -3    0.49    0.19 
   5  -7  -3   -0.06    0.18 
   5  -7  -3    0.61    0.20 
  -2  -5  -3    0.47    0.18 
   7  -2  -3    0.43    0.23 
  -7   2  -3    0.60    0.18 
   7  -2  -3    0.49    0.18 
  -7   2  -3    0.43    0.18 
  -5   7  -3    0.33    0.19 
   2   5  -3    0.37    0.20 
  -5   7   3    0.50    0.19 
   2   5   3    0.29    0.24 
  -5   7   3    0.23    0.13 
   7  -2   3    0.48    0.25 
   2   5   3    0.76    0.17 
  -7   2   3    0.27    0.19 
  -2  -5   3    0.95    0.21 
   5  -7   3    0.07    0.16 
   3   4  -3   79.69    2.74 
  -4   7  -3   94.25    2.50 
  -7   3  -3   91.04    2.63 
  -4   7  -3   92.50    2.67 
   7  -3  -3   90.37    2.85 
   4  -7  -3   91.93    2.89 
   7  -3  -3   92.99    2.55 
   3   4  -3   94.02    2.59 
  -3  -4  -3   90.21    2.59 
  -7   3  -3   95.61    2.48 
   4  -7  -3   93.64    2.61 
  -3  -4  -3   93.85    2.45 
  -3  -4   3   95.97    2.36 
   3   4   3   96.14    2.34 
  -4   7   3   92.60    2.49 
   4  -7   3   93.31    2.82 
   3   4   3   90.12    3.00 
  -3  -4   3   93.73    2.62 
  -7   3   3   88.95    2.63 
   7  -3   3   90.75    2.90 
  -7   4  -3   86.56    2.50 
   4   3  -3   87.64    2.45 
   7  -4  -3   83.74    2.68 
   4   3  -3   86.58    2.66 
  -4  -3  -3   84.30    2.44 
  -4  -3  -3   86.14    2.34 
   7  -4  -3   84.97    2.36 
   3  -7  -3   85.45    2.74 
  -7   4  -3   86.35    2.26 
  -3   7  -3   86.84    2.35 
   3  -7  -3   87.05    2.41 
  -3   7  -3   85.41    2.59 
  -4  -3   3   84.10    2.17 
   4   3   3   84.15    2.87 
   3  -7   3   83.78    2.61 
  -4  -3   3   87.04    2.48 
   7  -4   3   89.41    2.19 
  -7   4   3   85.69    2.18 
  -3   7   3   84.75    2.33 
   7  -4   3   85.98    2.73 
  -7   4   3   85.59    2.47 
   5   2  -3    0.06    0.20 
  -7   5  -3    0.22    0.19 
   2  -7  -3    0.21    0.15 
   7  -5  -3    0.19    0.20 
  -5  -2  -3   -0.02    0.15 
  -7   5  -3    0.00    0.12 
   7  -5  -3    0.05    0.13 
  -2   7  -3    0.12    0.21 
  -2   7  -3    0.26    0.18 
   2  -7  -3   -0.11    0.17 
   5   2  -3    0.12    0.17 
  -5  -2  -3    0.26    0.13 
  -2   7   3    0.20    0.17 
   2  -7   3    0.16    0.17 
   5   2   3    0.06    0.24 
   7  -5   3    0.26    0.19 
  -7   5   3   -0.15    0.11 
  -5  -2   3    0.03    0.16 
  -7   5   3    0.26    0.18 
   7  -6  -3   88.02    2.85 
   7  -6  -3   89.91    2.44 
  -6  -1  -3   89.51    2.57 
  -1   7  -3   90.79    2.67 
   1  -7  -3   89.31    2.52 
  -1   7  -3   89.23    2.46 
  -7   6  -3   90.78    2.39 
   6   1  -3   89.52    2.59 
  -7   6  -3   96.39    2.66 
   6   1  -3   94.28    2.90 
  -6  -1  -3   91.19    2.55 
  -7   6   3   88.56    2.56 
   1  -7   3   91.40    2.78 
  -1   7   3   90.51    2.93 
  -7   6   3   91.35    2.40 
   6   1   3   87.34    3.03 
  -1   7   3   89.37    2.44 
  -6  -1   3   88.18    2.61 
   1  -7   3   91.39    2.43 
   7  -6   3   88.82    2.83 
   7  -7  -3   63.81    2.26 
   7   0  -3   63.99    2.02 
  -7   0  -3   65.54    2.00 
  -7   0  -3   66.56    2.00 
   0   7  -3   65.04    1.90 
   0  -7  -3   64.90    1.99 
  -7   7  -3   65.74    2.07 
   0   7  -3   71.51    2.03 
  -7   7  -3   66.10    1.89 
   7   0  -3   68.96    2.32 
   0  -7   3   67.32    2.19 
  -7   7   3   64.81    1.88 
   0  -7   3   69.29    1.94 
  -7   7   3   67.37    1.98 
   7  -7   3   63.69    2.23 
   7   0   3   64.58    2.43 
   0   7   3   66.58    1.89 
  -7   0   3   64.57    2.06 
   0   7   3   64.47    2.34 
   7  -8  -3    3.76    0.54 
  -8   1  -3    5.02    0.45 
  -7   8  -3    3.81    0.45 
   1   7  -3    4.64    0.45 
   8  -1  -3    3.58    0.43 
  -7   8  -3    4.32    0.45 
   1   7  -3    3.83    0.48 
  -8   1  -3    3.69    0.41 
   8  -1  -3    3.42    0.55 
   1   7  -3    3.63    0.39 
  -1  -7  -3    3.99    0.46 
   1   7   3    4.27    0.40 
  -7   8   3    3.29    0.38 
  -7   8   3    3.50    0.40 
  -1  -7   3    4.27    0.40 
   8  -1   3    4.53    0.68 
   1   7   3    4.61    0.62 
   7  -8   3    4.31    0.50 
  -8   1   3    3.36    0.44 
  -8   2  -3   66.18    1.95 
  -2  -6  -3   64.11    2.02 
   8  -2  -3   67.23    2.34 
   2   6  -3   63.76    1.84 
  -8   2  -3   63.62    2.05 
  -6   8  -3   65.10    1.94 
   8  -2  -3   64.10    1.99 
   2   6  -3   67.49    2.20 
   6  -8  -3   65.47    2.31 
  -6   8  -3   65.04    2.06 
   2   6  -3   65.67    2.00 
   2   6   3   71.32    2.44 
   8  -2   3   66.73    2.43 
  -8   2   3   64.06    2.07 
   2   6   3   68.04    1.84 
  -6   8   3   66.20    1.94 
   6  -8   3   64.49    2.24 
  -2  -6   3   68.24    2.02 
  -5   8  -3   73.96    2.11 
   8  -3  -3   73.01    2.13 
  -3  -5  -3   74.45    2.20 
  -5   8  -3   71.85    2.25 
   3   5  -3   70.35    2.16 
  -8   3  -3   74.61    2.07 
   5  -8  -3   72.46    2.47 
   3   5  -3   72.18    2.35 
   8  -3  -3   71.90    2.45 
  -8   3  -3   71.05    2.22 
  -8   3   3   71.96    2.24 
  -5   8   3   73.80    2.10 
   3   5   3   74.25    2.59 
   8  -3   3   73.20    2.54 
  -3  -5   3   71.76    2.17 
   5  -8   3   73.76    2.40 
   8  -4  -3    1.62    0.27 
  -4   8  -3    0.99    0.27 
  -8   4  -3    1.20    0.27 
   4   4  -3    1.10    0.30 
   4   4  -3    1.02    0.27 
   4  -8  -3    0.93    0.27 
  -4  -4  -3    1.69    0.31 
  -4   8  -3    1.43    0.33 
   4  -8  -3    1.41    0.35 
   8  -4  -3    2.01    0.39 
   4  -8   3    1.14    0.29 
   8  -4   3    1.30    0.33 
  -4   8   3    1.14    0.27 
  -8   4   3    1.05    0.28 
  -4  -4   3    1.62    0.28 
   4   4   3    1.09    0.36 
   8  -5  -3   78.02    2.59 
  -5  -3  -3   76.22    2.30 
   3  -8  -3   75.45    2.24 
   5   3  -3   77.51    2.52 
   5   3  -3   78.69    2.32 
   8  -5  -3   77.78    2.19 
   3  -8  -3   82.02    2.65 
  -3   8  -3   78.97    2.50 
  -8   5  -3   78.69    2.35 
  -5  -3  -3   74.37    2.17 
  -3   8  -3   78.14    2.21 
   8  -5   3   76.46    2.59 
  -8   5   3   76.54    2.32 
  -3   8   3   77.48    2.20 
   5   3   3   79.31    2.76 
  -5  -3   3   74.73    2.30 
   3  -8   3   76.50    2.49 
  -8   5   3   77.54    2.06 
   6   2  -3   95.70    2.84 
   8  -6  -3  102.33    3.19 
   2  -8  -3   99.87    2.79 
   2  -8  -3  104.26    3.26 
  -2   8  -3   98.31    2.97 
   6   2  -3  100.72    3.16 
  -2   8  -3   99.56    2.73 
  -8   6  -3  103.95    2.61 
   8  -6  -3  100.64    2.72 
  -6  -2  -3   98.87    2.85 
  -8   6  -3   94.55    2.89 
  -6  -2  -3   99.30    2.79 
  -2   8   3  100.43    2.72 
  -8   6   3   99.49    2.60 
   6   2   3   97.55    3.37 
  -6  -2   3  103.63    2.91 
  -8   6   3   96.24    2.85 
   2  -8   3  100.18    3.07 
   8  -6   3   98.98    3.17 
  -8   7  -3    0.92    0.24 
  -1   8  -3    1.70    0.32 
   8  -7  -3    1.38    0.38 
   1  -8  -3    0.80    0.22 
  -7  -1  -3    1.39    0.27 
  -8   7  -3    1.33    0.31 
  -1   8  -3    0.91    0.27 
   7   1  -3    1.37    0.39 
   7   1  -3    1.58    0.33 
  -7  -1  -3    1.46    0.30 
   1  -8   3    2.10    0.37 
  -7  -1   3    1.33    0.31 
   8  -7   3    1.28    0.33 
  -8   7   3    1.00    0.27 
  -8   7   3    1.27    0.25 
  -1   8   3    1.13    0.35 
  -1   8   3    0.94    0.26 
   7   1   3    1.32    0.45 
   0   8  -3   58.17    1.77 
  -8   0  -3   58.07    1.87 
  -8   8  -3   55.59    1.73 
   8  -8  -3   60.30    2.21 
  -8   0  -3   57.64    1.87 
   8   0  -3   57.22    1.89 
  -8   8  -3   58.66    1.94 
   8   0  -3   58.02    2.20 
   0  -8  -3   56.53    1.85 
   0   8   3   59.06    1.76 
   8   0   3   59.83    2.38 
  -8   8   3   57.48    1.84 
   8  -8   3   58.07    2.14 
   0  -8   3   58.30    2.05 
  -8   8   3   58.03    1.76 
   0  -8   3   58.08    1.78 
   0   8   3   56.68    2.21 
  -8   0   3   57.61    1.93 
   9  -1  -3   54.43    1.87 
  -9   1  -3   54.61    1.88 
   1   8  -3   58.18    2.06 
   8  -9  -3   55.85    2.18 
  -9   1  -3   55.46    1.84 
  -8   9  -3   56.49    1.93 
  -8   9  -3   56.11    1.77 
   9  -1  -3   53.74    2.17 
   1   8  -3   54.30    1.72 
  -1  -8  -3   58.32    1.88 
  -1  -8   3   57.31    1.81 
   9  -1   3   56.17    2.35 
  -8   9   3   56.74    1.78 
  -9   1   3   54.70    1.92 
   1   8   3   57.96    1.75 
   8  -9   3   57.59    2.14 
   2   7  -3   41.91    1.67 
  -7   9  -3   43.71    1.49 
  -7   9  -3   44.82    1.59 
   7  -9  -3   43.85    1.83 
  -9   2  -3   44.38    1.59 
   9  -2  -3   44.38    1.54 
  -9   2  -3   44.12    1.48 
   2   7  -3   45.96    1.45 
   9  -2  -3   43.56    1.85 
  -2  -7  -3   43.97    1.56 
  -2  -7   3   41.72    1.48 
   2   7   3   45.10    1.88 
  -9   2   3   40.99    1.58 
   9  -2   3   43.00    1.94 
   7  -9   3   41.30    1.71 
  -7   9   3   46.20    1.51 
  -2  -7   3   44.66    1.51 
   3   6  -3    3.24    0.47 
   6  -9  -3    3.99    0.59 
  -9   3  -3    3.05    0.42 
   9  -3  -3    3.71    0.44 
  -9   3  -3    2.83    0.35 
   3   6  -3    3.11    0.43 
   9  -3  -3    3.80    0.59 
  -6   9  -3    3.44    0.46 
  -6   9  -3    2.52    0.38 
  -3  -6  -3    3.75    0.44 
  -9   3   3    3.19    0.44 
  -6   9   3    2.95    0.41 
  -3  -6   3    3.26    0.38 
   9  -3   3    3.65    0.60 
   3   6   3    3.05    0.59 
   6  -9   3    4.19    0.55 
  -9   4  -3   58.15    1.94 
  -5   9  -3   60.34    2.00 
   9  -4  -3   57.30    2.19 
   5  -9  -3   58.71    2.20 
  -4  -5  -3   59.03    1.91 
  -5   9  -3   59.95    1.84 
   9  -4  -3   57.81    1.82 
   4   5  -3   58.10    2.06 
   4   5  -3   59.19    1.91 
   5  -9   3   57.29    2.08 
  -9   4   3   59.71    1.96 
   9  -4   3   60.18    2.26 
   4   5   3   59.93    2.31 
  -4  -5   3   57.76    1.87 
  -5   9   3   59.03    1.83 
   5   4  -3   42.89    1.56 
  -9   5  -3   44.87    1.61 
  -4   9  -3   46.25    1.53 
   5   4  -3   47.09    1.76 
   4  -9  -3   44.20    1.83 
   9  -5  -3   44.73    1.46 
  -5  -4  -3   45.98    1.59 
   9  -5  -3   46.49    1.84 
  -4   9  -3   45.71    1.72 
   5   4   3   46.15    1.99 
   9  -5   3   45.37    1.86 
  -9   5   3   45.68    1.61 
  -5  -4   3   46.30    1.57 
   4  -9   3   44.53    1.72 
  -4   9   3   46.43    1.53 
  -9   6  -3    0.42    0.27 
  -3   9  -3    0.56    0.27 
   3  -9  -3    0.26    0.28 
  -6  -3  -3    0.65    0.27 
   9  -6  -3    0.31    0.31 
   6   3  -3    0.69    0.31 
  -6  -3  -3    0.20    0.18 
   6   3  -3    0.45    0.26 
   3  -9   3    1.08    0.30 
   9  -6   3    0.07    0.28 
  -3   9   3    0.79    0.29 
   6   3   3    0.44    0.35 
  -9   6   3    0.03    0.23 
  -6  -3   3    0.41    0.23 
   2  -9  -3   53.39    1.73 
   9  -7  -3   54.39    2.09 
  -7  -2  -3   51.90    1.79 
   2  -9  -3   53.00    2.13 
  -7  -2  -3   53.71    1.73 
   7   2  -3   54.18    2.05 
   7   2  -3   54.04    1.82 
  -9   7  -3   54.01    1.88 
  -2   9  -3   54.10    1.74 
  -2   9   3   55.53    1.74 
   2  -9   3   51.81    1.95 
  -9   7   3   54.73    1.69 
   9  -7   3   53.98    2.08 
  -9   7   3   54.65    1.80 
   7   2   3   55.56    2.29 
  -7  -2   3   53.74    1.81 
  -9   8  -3   55.38    1.68 
   8   1  -3   51.99    1.85 
   9  -8  -3   52.80    2.13 
  -9   8  -3   52.59    1.87 
   1  -9  -3   55.24    2.18 
  -8  -1  -3   53.68    1.78 
  -8  -1  -3   54.56    1.83 
   8   1  -3   58.49    2.16 
  -1   9  -3   54.71    1.74 
   1  -9  -3   53.80    1.77 
   8   1   3   52.57    2.29 
  -8  -1   3   54.06    1.86 
  -9   8   3   52.46    1.79 
  -9   8   3   53.88    1.67 
  -1   9   3   54.28    1.74 
   9  -8   3   57.08    2.12 
   1  -9   3   52.77    1.98 
   9   0  -3    0.61    0.40 
  -9   0  -3    0.39    0.24 
   9  -9  -3   -0.04    0.33 
  -9   0  -3    0.02    0.24 
  -9   9  -3    0.25    0.28 
   9   0  -3    0.01    0.29 
  -9   9  -3    0.12    0.26 
   0  -9  -3    0.36    0.25 
   0   9  -3   -0.11    0.23 
   0   9   3    0.23    0.27 
  -9   9   3   -0.04    0.23 
   0   9   3    0.04    0.32 
   0  -9   3   -0.19    0.22 
   9   0   3    0.22    0.41 
   9  -9   3   -0.17    0.26 
  -9   0   3   -0.21    0.23 
  10  -1  -3   42.68    1.96 
  -9  10  -3   43.16    1.68 
  -9  10  -3   42.89    1.52 
  10  -1  -3   42.83    1.64 
 -10   1  -3   40.51    1.61 
  -1  -9  -3   45.24    1.64 
 -10   1  -3   44.38    1.61 
   9 -10  -3   47.07    2.03 
  -1  -9   3   43.51    1.79 
  10  -1   3   41.96    2.09 
 -10   1   3   43.00    1.69 
   9 -10   3   43.10    1.88 
  -9  10   3   40.68    1.53 
   1   9   3   45.21    1.99 
 -10   2  -3    0.11    0.25 
  -8  10  -3   -0.15    0.27 
  10  -2  -3    0.33    0.28 
 -10   2  -3    0.34    0.31 
   8 -10  -3   -0.37    0.30 
   2   8  -3    0.15    0.28 
  -2  -8  -3    0.15    0.24 
  -8  10  -3    0.12    0.28 
  10  -2  -3    0.60    0.41 
  -2  -8   3    0.05    0.23 
  -8  10   3   -0.07    0.27 
  10  -2   3   -0.01    0.40 
   2   8   3    0.15    0.35 
   8 -10   3   -0.12    0.29 
 -10   2   3    0.41    0.30 
  -7  10  -3   60.67    2.06 
   7 -10  -3   62.96    2.37 
  -3  -7  -3   62.37    2.03 
  10  -3  -3   58.89    2.35 
  10  -3  -3   56.60    1.94 
 -10   3  -3   57.59    2.03 
  -7  10  -3   59.10    1.94 
   3   7  -3   61.41    2.19 
   7 -10   3   60.45    2.24 
  -7  10   3   58.16    1.92 
 -10   3   3   56.69    2.03 
   3   7   3   62.36    2.44 
  10  -3   3   62.07    2.50 
  -3  -7   3   61.25    1.98 
   4   6  -3   63.55    2.14 
 -10   4  -3   68.90    2.24 
  -6  10  -3   68.83    2.11 
  10  -4  -3   69.43    2.10 
  -6  10  -3   64.47    2.25 
   4   6  -3   67.04    2.35 
   6 -10  -3   67.45    2.52 
  -4  -6  -3   68.90    2.19 
  10  -4  -3   64.34    2.50 
   4   6   3   65.04    2.58 
   6 -10   3   63.70    2.37 
  -6  10   3   67.86    2.10 
  10  -4   3   66.56    2.57 
 -10   4   3   66.17    2.23 
  -4  -6   3   69.52    2.14 
  -5  10  -3    0.57    0.31 
   5 -10  -3    1.08    0.41 
  -5  -5  -3    0.95    0.30 
 -10   5  -3    0.74    0.30 
   5   5  -3    0.64    0.33 
   5   5  -3    0.84    0.32 
  10  -5  -3    1.12    0.43 
  10  -5  -3    0.90    0.27 
   5 -10   3    0.86    0.35 
   5   5   3    0.49    0.35 
  -5  10   3    1.20    0.33 
 -10   5   3    1.28    0.35 
  -5  -5   3    0.78    0.26 
  10  -5   3    0.31    0.35 
   6   4  -3   53.50    2.04 
   6   4  -3   54.74    1.86 
  10  -6  -3   53.88    2.15 
 -10   6  -3   53.87    1.89 
  -6  -4  -3   52.31    1.83 
  -4  10  -3   52.22    1.76 
   4 -10  -3   54.15    2.16 
  -4  10   3   53.88    1.78 
   6   4   3   50.11    2.24 
  -6  -4   3   52.29    1.80 
   4 -10   3   52.71    2.00 
  10  -6   3   50.24    2.13 
 -10   6   3   56.12    1.88 
   7   3  -3   40.44    1.75 
   7   3  -3   42.63    1.60 
   3 -10  -3   41.49    1.86 
  -7  -3  -3   39.80    1.56 
  -3  10  -3   44.40    1.55 
  10  -7  -3   41.53    1.83 
 -10   7  -3   43.23    1.63 
  -3  10   3   41.69    1.51 
  10  -7   3   40.06    1.81 
  -7  -3   3   41.36    1.56 
   3 -10   3   43.36    1.73 
   7   3   3   47.94    2.09 
 -10   7   3   42.68    1.60 
   8   2  -3    0.00    0.27 
  -2  10  -3    0.11    0.30 
   2 -10  -3    0.22    0.32 
  10  -8  -3   -0.03    0.37 
  -8  -2  -3   -0.27    0.21 
 -10   8  -3   -0.14    0.28 
   8   2  -3    0.19    0.30 
  -8  -2  -3    0.20    0.24 
   8   2   3   -0.01    0.39 
  -2  10   3    0.16    0.29 
  10  -8   3    0.04    0.32 
 -10   8   3    0.32    0.27 
   2 -10   3    0.10    0.26 
  -8  -2   3    0.09    0.25 
   1 -10  -3   56.17    2.29 
  -9  -1  -3   54.44    1.92 
   9   1  -3   54.13    2.23 
 -10   9  -3   54.89    1.99 
  -9  -1  -3   57.14    1.91 
  10  -9  -3   53.39    2.25 
   9   1  -3   54.60    1.96 
  -1  10  -3   58.67    1.86 
  -9  -1   3   54.92    1.97 
   1 -10   3   55.18    2.11 
 -10   9   3   54.01    1.89 
   9   1   3   52.07    2.41 
  10  -9   3   56.30    2.24 
  -1  10   3   55.55    1.84 
 -10   0  -3   33.49    1.39 
  10   0  -3   33.18    1.45 
  10 -10  -3   34.91    1.73 
  10   0  -3   36.15    1.82 
 -10  10  -3   32.95    1.46 
 -10  10  -3   33.13    1.30 
   0  10  -3   32.92    1.31 
   0 -10  -3   34.80    1.38 
 -10   0  -3   33.73    1.40 
  10   0   3   33.89    1.90 
   0 -10   3   31.00    1.52 
 -10   0   3   32.60    1.44 
   0  10   3   33.94    1.33 
   0  10   3   31.96    1.71 
  10 -10   3   32.52    1.63 
  10 -11  -3    0.04    0.41 
 -11   1  -3    0.55    0.33 
  -1 -10  -3    0.22    0.30 
 -10  11  -3    0.02    0.33 
  11  -1  -3    0.11    0.34 
 -10  11  -3    0.20    0.35 
 -11   1  -3    0.08    0.30 
  11  -1   3    0.40    0.53 
  -1 -10   3    0.20    0.33 
   1  10   3   -0.01    0.36 
 -10  11   3    0.14    0.33 
 -11   1   3    0.24    0.33 
  10 -11   3   -0.44    0.32 
 -11   2  -3   44.26    1.75 
  11  -2  -3   45.77    1.72 
   9 -11  -3   43.55    2.04 
  11  -2  -3   44.54    2.07 
  -2  -9  -3   44.79    1.71 
   2   9  -3   45.86    1.90 
  -9  11  -3   45.52    1.64 
  -9  11  -3   44.28    1.77 
  11  -2   3   45.03    2.23 
  -9  11   3   43.86    1.65 
   9 -11   3   44.75    1.97 
   2   9   3   45.60    2.11 
 -11   2   3   44.98    1.77 
   8 -11  -3   42.85    2.00 
  -3  -8  -3   43.75    1.68 
   3   8  -3   41.35    1.80 
  -8  11  -3   43.59    1.61 
 -11   3  -3   45.00    1.73 
  11  -3  -3   44.20    1.64 
  11  -3  -3   43.55    2.04 
  -3  -8   3   44.78    1.65 
 -11   3   3   42.55    1.73 
  11  -3   3   46.81    2.19 
   3   8   3   42.71    2.01 
  -8  11   3   45.08    1.65 
   8 -11   3   43.18    1.88 
   7 -11  -3    0.63    0.41 
  -7  11  -3    0.25    0.30 
  11  -4  -3    0.21    0.28 
 -11   4  -3    0.48    0.32 
  11  -4  -3    0.32    0.42 
   4   7  -3    0.09    0.31 
  -4  -7  -3    0.48    0.30 
  -4  -7   3    0.44    0.28 
   4   7   3    0.06    0.28 
  11  -4   3    0.23    0.45 
 -11   4   3    0.44    0.35 
   7 -11   3    0.49    0.36 
  -7  11   3    0.50    0.34 
  -6  11  -3   39.19    1.55 
   6 -11  -3   42.09    1.94 
 -11   5  -3   43.40    1.67 
  -5  -6  -3   38.78    1.59 
   5   6  -3   41.76    1.75 
  11  -5  -3   42.47    1.95 
   5   6   3   44.29    2.03 
  11  -5   3   42.01    1.98 
   6 -11   3   42.04    1.79 
 -11   5   3   40.92    1.64 
  -6  11   3   42.13    1.58 
   5 -11  -3   60.32    2.32 
   6   5  -3   51.48    1.92 
   6   5  -3   54.90    2.11 
  11  -6  -3   49.56    2.22 
  -6  -5  -3   52.40    1.91 
  -5  11  -3   55.03    1.88 
 -11   6  -3   54.17    1.97 
  11  -6   3   55.26    2.30 
 -11   6   3   54.51    1.97 
   5 -11   3   55.07    2.12 
   6   5   3   50.51    2.32 
  -6  -5   3   53.17    1.87 
  -5  11   3   53.24    1.85 
  -4  11  -3    1.73    0.43 
   7   4  -3    2.19    0.48 
 -11   7  -3    1.81    0.44 
   4 -11  -3    1.71    0.51 
  -7  -4  -3    2.22    0.44 
   7   4  -3    1.90    0.49 
  11  -7  -3    1.81    0.54 
 -11   7   3    1.76    0.44 
   7   4   3    2.27    0.62 
  -7  -4   3    1.72    0.39 
  11  -7   3    3.22    0.65 
  -4  11   3    3.07    0.51 
   4 -11   3    2.16    0.48 
 -11   8  -3   30.35    1.43 
  -3  11  -3   33.03    1.34 
   3 -11  -3   32.49    1.65 
  -8  -3  -3   31.72    1.37 
   8   3  -3   32.82    1.42 
  11  -8  -3   26.96    1.60 
   8   3   3   31.28    1.78 
  -8  -3   3   32.89    1.36 
  -3  11   3   30.16    1.31 
 -11   8   3   30.50    1.36 
   3 -11   3   30.59    1.49 
  11  -8   3   30.74    1.61 
 -11   9  -3   43.31    1.72 
   9   2  -3   41.16    1.68 
   2 -11  -3   41.23    1.95 
  -2  11  -3   41.85    1.58 
  11  -9  -3   43.76    2.02 
  -9  -2  -3   40.15    1.64 
  11  -9   3   40.49    1.93 
   2 -11   3   43.52    1.82 
  -9  -2   3   41.97    1.65 
 -11   9   3   42.21    1.64 
   9   2   3   38.15    2.06 
 -10  -1  -3    0.66    0.33 
 -10  -1  -3    0.42    0.36 
  10   1  -3    1.17    0.44 
   1 -11  -3    0.19    0.34 
 -11  10  -3    0.74    0.43 
  -1  11  -3    0.61    0.38 
  11 -10  -3    0.51    0.48 
  10   1   3    0.34    0.51 
  11 -10   3    0.47    0.43 
 -10  -1   3    0.50    0.34 
  -1  11   3    0.10    0.34 
   1 -11   3    0.41    0.33 
  11 -11  -3   28.88    1.71 
 -11  11  -3   29.84    1.47 
 -11   0  -3   30.32    1.40 
 -11   0  -3   29.69    1.38 
   0 -11  -3   27.12    1.61 
  11   0  -3   31.08    1.45 
   0 -11   3   29.67    1.53 
  11   0   3   31.44    1.91 
  11 -11   3   28.10    1.61 
 -11   0   3   30.49    1.43 
 -11  12   3   37.58    1.71 
  -1 -11   3   36.59    1.76 
  12  -2  -3   36.61    1.54 
  -2 -10  -3   35.25    1.53 
  10 -12  -3   31.33    1.82 
 -12   2  -3   34.61    1.57 
 -10  12  -3   37.16    1.50 
  12  -2   3   30.38    1.99 
   2  10   3   34.18    1.88 
  10 -12   3   32.93    1.86 
 -12   2   3   34.45    1.65 
  -2 -10   3   38.16    1.74 
 -10  12   3   34.37    1.49 
  -9  12  -3    0.06    0.36 
 -12   3  -3    0.17    0.35 
   9 -12  -3   -0.05    0.44 
  -3  -9  -3    0.15    0.30 
   3   9  -3    0.39    0.39 
  12  -3  -3    0.16    0.34 
  -9  12   3    0.28    0.39 
  -3  -9   3   -0.25    0.27 
   3   9   3    0.46    0.45 
 -12   3   3    0.31    0.37 
   9 -12   3   -0.34    0.35 
  12  -3   3   -0.01    0.49 
   8 -12  -3   30.02    1.69 
 -12   4  -3   28.54    1.41 
   4   8  -3   28.63    1.55 
  -8  12  -3   27.11    1.31 
  -4  -8  -3   31.83    1.43 
  12  -4  -3   25.81    1.70 
 -12   4   3   29.98    1.44 
   4   8   3   29.28    1.69 
  -8  12   3   37.94    1.43 
  -4  -8   3   30.71    1.36 
   8 -12   3   26.91    1.52 
  12  -4   3   35.51    1.91 
 -12   5  -3   34.07    1.54 
  12  -5  -3   35.08    1.85 
  -5  -7  -3   33.91    1.48 
   7 -12  -3   32.08    1.78 
  -7  12  -3   31.39    1.43 
  -5  -7   3   34.33    1.48 
   7 -12   3   32.17    1.63 
   5   7   3   36.20    1.88 
  12  -5   3   36.18    1.91 
  -7  12   3   33.77    1.47 
 -12   5   3   35.49    1.57 
  12  -6  -3   -0.19    0.41 
   6 -12  -3    0.04    0.41 
  -6  -6  -3    0.16    0.30 
  -6  12  -3    0.04    0.34 
 -12   6  -3    0.03    0.33 
  -6  -6   3    0.19    0.32 
 -12   6   3    0.08    0.33 
  12  -6   3    0.29    0.46 
  -6  12   3   -0.52    0.30 
   6   6   3    0.71    0.52 
   6 -12   3    0.15    0.31 
  -5  12  -3   49.41    1.85 
   5 -12  -3   50.48    2.25 
   7   5  -3   50.47    1.94 
  12  -7  -3   49.37    2.29 
  -7  -5  -3   51.06    1.91 
 -12   7  -3   50.73    1.99 
 -12   7   3   53.72    2.00 
  12  -7   3   50.98    2.31 
   5 -12   3   48.89    2.08 
   7   5   3   49.50    2.35 
  -8  -4  -3   34.63    1.51 
   8   4  -3   35.49    1.57 
 -12   8  -3   36.13    1.60 
   4 -12  -3   33.29    1.80 
  -4  12  -3   35.04    1.48 
  12  -8  -3   33.78    1.82 
  12  -8   3   35.38    1.87 
  -4  12   3   33.96    1.47 
 -12   8   3   33.71    1.51 
   4 -12   3   35.12    1.67 
  -8  -4   3   32.45    1.43 
   8   4   3   32.66    1.89 
  -9  -3  -3    2.32    0.53 
 -12   9  -3    2.55    0.55 
   9   3  -3    2.03    0.49 
  -3  12  -3    1.96    0.50 
  12  -9  -3    2.19    0.62 
   3 -12  -3    2.74    0.64 
   3 -12   3    2.33    0.54 
 -12   9   3    3.08    0.54 
  -3  12   3    2.07    0.50 
   9   3   3    2.16    0.71 
  12  -9   3    2.11    0.64 
  -9  -3   3    2.24    0.48 
  10   2  -3   37.04    1.75 
  -2  12  -3   35.11    1.51 
 -10  -2  -3   36.86    1.60 
  12 -10  -3   33.12    1.91 
 -12  10  -3   34.01    1.62 
  10   2   3   36.18    2.05 
 -10  -2   3   36.55    1.58 
   2 -12   3   36.91    1.76 
  -2  12   3   38.34    1.57 
  -1  12  -3   26.14    1.28 
 -12  11  -3   25.11    1.42 
  -1  12   3   26.47    1.44 
   1 -12   3   26.98    1.51 
  -4  -9   3   26.89    1.34 
  13  -5  -3    1.21    0.65 
  -5  -8   3    0.37    0.32 
  13  -6  -3   25.43    1.65 
  -6  -7   3   25.20    1.33 
   6   7   3   26.16    1.83 
   7 -13   3   25.71    1.64 
  13  -7  -3   27.79    1.73 
 -13   7   3   29.65    1.59 
   6 -13   3   24.91    1.47 
   7   6   3   25.53    1.76 
  13  -8  -3   -0.29    0.50 
   5 -13   3    0.34    0.42 
 -13   8   3   -0.33    0.38 
 -13   9   3   24.69    1.44 
   0   0  -4  144.26    3.55 
   0   0  -4  142.65    3.62 
   0   0   4  142.66    3.42 
   0   0   4  133.12    3.64 
   1  -1  -4   23.23    0.80 
   0   1  -4   26.20    0.74 
   0  -1  -4   24.58    0.78 
  -1   0  -4   24.64    0.75 
   1  -1  -4   24.63    0.74 
   0   1  -4   24.53    0.85 
  -1   1  -4   25.55    0.76 
   1  -1  -4   25.61    0.74 
  -1   0  -4   25.47    0.74 
   1   0  -4   24.82    0.80 
   1   0  -4   25.82    0.78 
   0  -1  -4   25.07    0.75 
  -1   1  -4   24.27    0.79 
  -1   1   4   25.43    0.74 
   0  -1   4   24.72    0.74 
   0  -1   4   25.56    0.69 
   1   0   4   24.26    0.77 
   0   1   4   25.22    0.73 
   0   1   4   24.32    0.81 
   1   0   4   25.63    0.82 
   1  -1   4   25.48    0.75 
   1  -1   4   24.39    0.73 
  -1   0   4   24.24    0.77 
  -2   1  -4  217.81    5.46 
  -1  -1  -4  218.29    5.38 
  -1  -1  -4  225.61    5.38 
   2  -1  -4  223.98    5.41 
  -2   1  -4  215.36    5.33 
   1   1  -4  219.46    5.37 
  -1   2  -4  200.79    5.53 
   1  -2  -4  218.49    5.44 
  -1   2  -4  221.15    5.31 
   1   1  -4  215.80    5.54 
   1   1  -4  220.47    5.56 
   2  -1  -4  228.60    5.61 
   1   1   4  213.38    5.78 
   1  -2   4  218.37    5.62 
  -2   1   4  209.99    5.44 
  -1  -1   4  214.37    5.14 
   2  -1   4  215.95    5.70 
   1  -2   4  214.49    5.14 
   1   1   4  222.44    5.13 
  -2   1   4  215.16    5.13 
  -1   2   4  218.40    5.14 
   2  -1   4  215.39    5.14 
  -1   2   4  219.01    5.70 
  -1   2   4  219.40    5.36 
   2   0  -4  104.29    2.70 
   0   2  -4   96.74    2.86 
  -2   2  -4  105.97    2.75 
  -2   2  -4  103.14    2.63 
   0  -2  -4  104.96    2.72 
   2  -2  -4  107.55    2.83 
  -2   0  -4  106.93    2.68 
  -2   0  -4  109.07    2.70 
   0   2  -4  102.18    2.64 
   2  -2   4  105.27    2.84 
  -2   2   4  106.01    2.68 
   2  -2   4  106.54    2.57 
   0  -2   4  106.57    2.58 
  -2   2   4  105.30    2.57 
   2   0   4  106.62    2.94 
   0  -2   4  113.04    2.78 
   0   2   4  104.69    2.56 
  -2   0   4  101.14    2.75 
  -2   0   4  103.05    2.61 
   2   0   4  101.49    2.58 
   0   2   4  102.64    2.93 
  -2   3  -4   54.50    1.64 
  -3   1  -4   56.16    1.59 
   2  -3  -4   56.60    1.66 
   1   2  -4   55.44    1.69 
  -2   3  -4   61.19    1.44 
   1   2  -4   58.29    1.60 
  -3   1  -4   56.95    1.53 
  -1  -2  -4   57.64    1.59 
   2  -3  -4   58.86    1.71 
  -2   3  -4   56.46    1.51 
   3  -1  -4   56.45    1.63 
   3  -1  -4   57.98    1.59 
   1   2  -4   57.15    1.55 
  -3   1   4   54.66    1.60 
  -1  -2   4   56.80    1.49 
   1   2   4   55.28    1.80 
  -3   1   4   57.24    1.48 
  -2   3   4   58.32    1.49 
   1   2   4   59.20    1.48 
   2  -3   4   58.21    1.66 
   3  -1   4   57.63    1.50 
  -2   3   4   58.40    1.52 
   3  -1   4   59.58    1.76 
  -3   2  -4   43.32    1.09 
  -1   3  -4   40.32    1.07 
   2   1  -4   35.24    1.17 
  -1   3  -4   41.71    1.13 
   3  -2  -4   40.76    1.20 
   2   1  -4   40.20    1.24 
  -1   3  -4   39.89    1.31 
  -2  -1  -4   40.63    1.11 
  -2  -1  -4   40.58    1.18 
  -3   2  -4   39.55    1.20 
   1  -3  -4   41.95    1.22 
   3  -2  -4   41.39    1.23 
  -3   2   4   41.33    1.17 
  -1   3   4   41.21    1.32 
   1  -3   4   39.89    1.20 
  -3   2   4   40.85    1.10 
   3  -2   4   40.60    1.27 
   2   1   4   39.92    1.07 
  -2  -1   4   40.92    1.12 
   2   1   4   39.65    1.38 
  -1   3   4   40.51    1.13 
   3  -2   4   40.23    1.10 
  -3   3  -4  255.06    6.51 
   3  -3  -4  263.85    6.77 
  -3   3  -4  256.62    6.07 
   3  -3  -4  256.67    6.43 
   3   0  -4  263.11    6.72 
   3   0  -4  251.74    6.38 
  -3   0  -4  256.37    6.35 
  -3   0  -4  256.57    6.43 
   0  -3  -4  262.05    6.40 
  -3   3  -4  258.00    6.23 
   0   3  -4  263.85    6.31 
   0   3  -4  238.56    6.60 
   0   3  -4  260.53    6.08 
   0   3   4  250.34    6.88 
  -3   3   4  263.19    6.09 
   3   0   4  259.54    6.05 
  -3   3   4  265.34    6.41 
  -3   0   4  250.87    6.07 
   0   3   4  261.77    6.08 
   3  -3   4  256.79    6.08 
  -3   0   4  243.79    6.49 
   0  -3   4  258.59    6.09 
   3   0   4  265.27    6.91 
   3  -3   4  262.85    6.77 
   0  -3   4  256.13    6.69 
   4  -1  -4   32.43    1.02 
   4  -1  -4   31.98    1.07 
  -1  -3  -4   31.95    1.02 
  -4   1  -4   30.98    1.00 
  -3   4  -4   31.03    1.05 
   3  -4  -4   32.52    1.07 
   1   3  -4   31.28    1.09 
  -4   1  -4   30.61    0.95 
   1   3  -4   32.99    1.02 
  -3   4  -4   31.78    0.96 
   3  -4  -4   31.57    1.11 
  -3   4   4   31.90    0.91 
   4  -1   4   33.01    0.94 
   3  -4   4   33.50    1.08 
  -1  -3   4   31.20    0.94 
  -4   1   4   31.49    0.88 
  -4   1   4   29.25    1.01 
   1   3   4   30.86    1.21 
   1   3   4   33.35    0.93 
  -3   4   4   32.99    0.97 
   4  -1   4   30.42    1.16 
   2   2  -4  122.74    3.31 
  -4   2  -4  125.99    3.24 
   2   2  -4  119.93    3.16 
  -2  -2  -4  126.65    3.10 
   2   2  -4  122.94    3.29 
  -2   4  -4  120.93    3.31 
   4  -2  -4  123.75    3.37 
  -2   4  -4  120.04    3.04 
  -4   2  -4  122.06    3.08 
   2  -4  -4  126.70    3.24 
  -2   4  -4  127.44    3.01 
   2  -4  -4  121.46    3.45 
   2   2   4  120.99    2.96 
   2   2   4  118.27    3.54 
  -2  -2   4  124.29    2.99 
   4  -2   4  123.51    3.46 
  -4   2   4  122.96    3.23 
   2  -4   4  116.62    3.35 
  -4   2   4  120.82    2.97 
   4  -2   4  124.67    2.98 
  -2   4   4  121.15    3.04 
   3   1  -4   71.14    2.00 
  -3  -1  -4   67.86    1.94 
  -1   4  -4   76.67    1.89 
  -1   4  -4   73.14    1.91 
  -4   3  -4   69.91    2.04 
   1  -4  -4   74.45    2.02 
   3   1  -4   74.33    2.10 
  -1   4  -4   72.04    2.19 
   4  -3  -4   74.33    2.14 
   4  -3  -4   74.54    2.01 
  -3  -1  -4   72.22    1.99 
  -4   3  -4   74.25    1.85 
  -1   4   4   73.24    1.91 
  -3  -1   4   75.37    1.90 
   4  -3   4   72.58    2.16 
  -3  -1   4   73.94    2.07 
   1  -4   4   72.45    2.08 
   4  -3   4   73.29    1.88 
   3   1   4   72.36    2.31 
  -1   4   4   73.02    2.24 
   3   1   4   71.25    1.81 
  -4   3   4   74.02    2.00 
  -4   3   4   73.97    1.88 
   4   0  -4   35.25    1.12 
   4   0  -4   37.75    1.22 
   4  -4  -4   36.26    1.23 
   0   4  -4   36.72    1.05 
  -4   4  -4   36.30    1.05 
  -4   0  -4   36.00    1.09 
   0   4  -4   33.00    1.22 
   4  -4  -4   36.52    1.14 
  -4   0  -4   36.42    1.09 
   0  -4  -4   36.67    1.13 
   0   4  -4   33.86    1.05 
  -4   4  -4   34.94    1.15 
  -4   0   4   35.50    1.00 
  -4   0   4   34.43    1.15 
  -4   4   4   36.72    1.06 
   0   4   4   35.99    1.07 
   0  -4   4   35.84    1.15 
   0   4   4   33.38    1.30 
   4   0   4   35.62    1.35 
   4   0   4   36.19    0.96 
   4  -4   4   34.07    1.21 
  -4   4   4   35.14    1.06 
  -1  -4  -4  103.17    2.72 
  -5   1  -4  100.96    2.72 
   5  -1  -4  102.43    2.90 
   1   4  -4   98.19    2.53 
  -4   5  -4   95.80    2.76 
  -5   1  -4  100.12    2.64 
  -4   5  -4   99.92    2.57 
   5  -1  -4   98.99    2.70 
   1   4  -4  102.39    2.65 
   1   4  -4  100.75    2.83 
   4  -5  -4  100.58    2.74 
   4  -5  -4  103.16    2.95 
  -4   5   4   98.58    2.62 
  -5   1   4   98.13    2.43 
   5  -1   4   98.81    3.04 
   1   4   4  100.91    2.53 
  -4   5   4  100.83    2.58 
   4  -5   4   96.77    2.88 
  -5   1   4  100.23    2.76 
   1   4   4   95.22    3.05 
   5  -1   4  101.13    2.47 
   3  -5  -4   15.98    0.76 
  -5   2  -4   15.35    0.57 
   2   3  -4   16.37    0.67 
  -2  -3  -4   16.26    0.52 
   3  -5  -4   17.66    0.72 
  -5   2  -4   15.49    0.65 
  -3   5  -4   16.48    0.70 
   2   3  -4   15.70    0.63 
   5  -2  -4   17.63    0.73 
  -2  -3  -4   16.08    0.65 
   2   3  -4   15.64    0.69 
   5  -2  -4   16.42    0.65 
  -3   5  -4   17.22    0.64 
  -3   5   4   16.74    0.53 
  -3   5   4   16.78    0.64 
  -5   2   4   16.15    0.54 
   3  -5   4   17.29    0.71 
  -5   2   4   16.16    0.67 
   2   3   4   16.82    0.56 
   2   3   4   15.53    0.84 
   5  -2   4   16.71    0.55 
  -2  -3   4   15.56    0.56 
   5  -2   4   15.77    0.77 
   5  -3  -4   37.55    1.18 
  -5   3  -4   36.80    1.22 
   2  -5  -4   37.71    1.38 
  -5   3  -4   36.48    1.06 
  -2   5  -4   36.59    1.14 
   2  -5  -4   36.65    1.20 
  -2   5  -4   38.54    1.03 
   5  -3  -4   37.72    1.30 
  -3  -2  -4   39.22    1.11 
  -3  -2  -4   36.35    1.19 
   3   2  -4   41.83    1.21 
   3   2  -4   39.00    1.26 
  -2   5  -4   40.03    1.35 
   3   2   4   39.46    1.04 
  -5   3   4   39.17    1.09 
   5  -3   4   36.61    1.07 
   2  -5   4   40.03    1.28 
  -3  -2   4   39.96    1.07 
   5  -3   4   38.95    1.35 
  -3  -2   4   36.34    1.24 
   3   2   4   38.70    1.49 
  -2   5   4   37.72    1.15 
  -5   3   4   38.53    1.21 
  -4  -1  -4  210.65    5.23 
   5  -4  -4  206.28    5.59 
   5  -4  -4  206.29    5.20 
  -1   5  -4  204.54    4.99 
   4   1  -4  210.00    5.56 
   1  -5  -4  204.66    5.23 
  -5   4  -4  210.77    5.01 
  -5   4  -4  203.83    5.34 
  -4  -1  -4  203.21    5.21 
  -1   5  -4  214.28    5.10 
  -1   5  -4  204.88    5.48 
  -5   4  -4  209.34    4.94 
  -1   5   4  206.01    4.98 
  -4  -1   4  203.44    5.34 
  -4  -1   4  205.46    4.93 
   4   1   4  212.91    4.83 
  -5   4   4  209.28    5.27 
  -5   4   4  180.64    4.94 
  -1   5   4  204.80    5.71 
   5  -4   4  204.32    5.60 
   1  -5   4  205.06    5.51 
   4   1   4  204.74    5.79 
  -5   5  -4   11.97    0.60 
  -5   5  -4   10.74    0.51 
   5   0  -4   11.24    0.63 
   5   0  -4   11.47    0.56 
   5  -5  -4   13.33    0.56 
  -5   0  -4   13.17    0.57 
  -5   0  -4   11.99    0.54 
   0   5  -4   11.86    0.64 
   0   5  -4   12.06    0.50 
   0   5  -4   12.48    0.53 
   5  -5  -4   12.20    0.65 
   0  -5  -4   12.10    0.57 
   5   0   4   11.73    0.39 
   0   5   4   12.88    0.54 
   5  -5   4   13.08    0.65 
   5   0   4   12.02    0.75 
   0  -5   4   11.88    0.58 
  -5   5   4   12.45    0.52 
  -5   0   4   11.83    0.42 
   0   5   4   11.93    0.71 
  -5   5   4   11.97    0.53 
  -5   0   4   11.33    0.58 
   1   5  -4   54.65    1.72 
  -5   6  -4   52.96    1.56 
  -6   1  -4   55.89    1.65 
   1   5  -4   53.67    1.53 
   1   5  -4   54.51    1.73 
  -1  -5  -4   54.98    1.66 
   1   5  -4   52.30    1.58 
  -5   6  -4   52.65    1.70 
   6  -1  -4   54.81    1.65 
  -6   1  -4   54.22    1.59 
   5  -6  -4   54.33    1.64 
   5  -6  -4   56.33    1.88 
   6  -1  -4   55.23    1.83 
   5  -6   4   52.35    1.79 
   6  -1   4   54.38    1.96 
  -5   6   4   54.31    1.56 
   1   5   4   53.61    1.51 
  -6   1   4   53.07    1.69 
  -5   6   4   52.42    1.56 
   1   5   4   52.46    1.95 
   2   4  -4   43.10    1.33 
  -4   6  -4   42.30    1.31 
   4  -6  -4   42.91    1.41 
   2   4  -4   41.79    1.42 
  -4   6  -4   41.29    1.41 
   6  -2  -4   42.47    1.50 
   6  -2  -4   42.20    1.35 
  -2  -4  -4   44.50    1.38 
   2   4  -4   44.50    1.43 
  -6   2  -4   45.69    1.30 
   4  -6  -4   42.00    1.55 
  -6   2  -4   41.98    1.37 
   6  -2   4   43.19    1.19 
  -4   6   4   42.23    1.31 
  -4   6   4   43.55    1.24 
   6  -2   4   43.66    1.60 
  -6   2   4   42.39    1.40 
   2   4   4   42.16    1.65 
   4  -6   4   41.67    1.47 
   2   4   4   43.04    1.22 
  -2  -4   4   43.60    1.24 
  -6   2   4   43.47    1.15 
  -6   3  -4   96.87    2.50 
  -3  -3  -4   94.58    2.64 
   3  -6  -4   92.44    2.91 
   6  -3  -4   95.47    2.60 
   3   3  -4   96.87    2.63 
  -6   3  -4   92.43    2.67 
  -3   6  -4   96.02    2.53 
   3  -6  -4   99.23    2.68 
   6  -3  -4   96.11    2.85 
  -3   6  -4   96.27    2.77 
   3   3  -4   96.83    2.78 
  -3  -3  -4   98.75    2.51 
   3   3   4  100.91    2.40 
   6  -3   4   99.22    2.93 
   3  -6   4   94.01    2.81 
  -3  -3   4   94.20    2.41 
   3   3   4   88.81    3.01 
  -3   6   4   95.46    2.53 
   6  -3   4   94.97    2.39 
  -6   3   4   94.36    2.67 
  -3  -3   4   94.95    2.70 
  -6   3   4   96.61    2.40 
  -2   6  -4   37.71    1.40 
  -4  -2  -4   37.04    1.22 
  -6   4  -4   37.44    1.03 
  -4  -2  -4   38.33    1.13 
   2  -6  -4   37.63    1.21 
   4   2  -4   30.43    1.26 
  -6   4  -4   36.88    1.25 
  -2   6  -4   36.12    1.17 
   6  -4  -4   37.88    1.36 
   6  -4  -4   37.48    1.18 
   2  -6  -4   38.09    1.45 
   4   2   4   37.20    1.53 
  -6   4   4   37.29    1.09 
   2  -6   4   37.70    1.04 
   2  -6   4   35.71    1.28 
  -6   4   4   37.17    1.22 
   4   2   4   37.68    1.01 
   6  -4   4   37.50    1.09 
  -2   6   4   37.31    1.17 
   6  -4   4   36.69    1.38 
  -4  -2   4   33.54    1.22 
  -4  -2   4   39.21    1.08 
  -6   5  -4   30.19    0.97 
  -1   6  -4   31.14    0.95 
   1  -6  -4   29.85    1.05 
   5   1  -4   29.97    1.07 
  -6   5  -4   30.41    1.11 
   5   1  -4   30.67    1.19 
  -5  -1  -4   31.63    1.02 
   6  -5  -4   30.98    1.02 
   6  -5  -4   31.95    1.22 
  -1   6  -4   28.52    1.18 
  -1   6  -4   30.53    1.02 
  -5  -1  -4   31.99    1.08 
  -6   5   4   30.72    1.04 
   1  -6   4   29.18    1.11 
   6  -5   4   31.84    1.22 
  -5  -1   4   30.65    1.10 
  -6   5   4   28.81    0.97 
  -1   6   4   30.69    1.02 
   5   1   4   29.17    1.34 
  -6   0  -4  109.92    3.02 
  -6   6  -4  110.22    3.11 
   6  -6  -4  110.33    2.96 
  -6   0  -4  105.13    2.99 
   0  -6  -4  112.30    3.03 
   0   6  -4  111.41    2.93 
  -6   6  -4  110.13    2.85 
   6  -6  -4  109.62    3.32 
   6   0  -4  108.44    3.29 
   0   6  -4  114.20    3.18 
   0   6  -4  108.85    2.86 
   0  -6   4  110.20    3.21 
  -6   6   4  110.92    2.87 
   6  -6   4  112.13    3.30 
  -6   0   4  109.14    3.10 
   0   6   4  111.01    2.86 
   6   0   4  109.48    3.48 
   0   6   4  109.33    3.43 
  -6   6   4  110.72    2.98 
   1   6  -4   51.38    1.49 
   6  -7  -4   50.16    1.53 
   1   6  -4   52.52    1.73 
  -7   1  -4   49.37    1.61 
  -7   1  -4   49.97    1.56 
   1   6  -4   51.51    1.67 
  -1  -6  -4   49.96    1.61 
   1   6  -4   49.14    1.54 
  -6   7  -4   49.16    1.66 
  -6   7  -4   49.68    1.52 
   7  -1  -4   45.61    1.60 
   7  -1  -4   50.86    1.82 
   6  -7  -4   52.13    1.86 
  -7   1   4   51.48    1.67 
   1   6   4   46.94    1.88 
   6  -7   4   49.13    1.77 
  -6   7   4   51.20    1.52 
  -6   7   4   47.96    1.52 
   7  -1   4   48.59    1.94 
   7  -2  -4  140.13    3.78 
  -5   7  -4  139.55    3.89 
   5  -7  -4  138.88    3.80 
   5  -7  -4  145.56    4.20 
   2   5  -4  146.22    4.03 
   7  -2  -4  141.42    4.13 
  -7   2  -4  147.73    3.72 
   2   5  -4  138.64    3.75 
   2   5  -4  142.17    3.87 
  -7   2  -4  137.44    3.84 
   2   5  -4  143.31    3.54 
  -5   7  -4  140.30    3.63 
  -2  -5  -4  142.30    3.82 
  -7   2   4  139.50    3.87 
   5  -7   4  139.80    4.08 
   2   5   4  139.00    4.30 
   2   5   4  141.73    3.52 
   7  -2   4  145.96    4.28 
  -5   7   4  140.16    3.63 
  -3  -4  -4   24.28    0.95 
   3   4  -4   25.59    0.96 
  -4   7  -4   23.31    1.01 
  -4   7  -4   25.93    0.94 
   7  -3  -4   24.76    0.93 
   3   4  -4   25.97    1.02 
   4  -7  -4   26.53    1.02 
  -7   3  -4   23.85    0.83 
   7  -3  -4   26.58    1.11 
   4  -7  -4   23.56    1.12 
  -7   3  -4   23.89    0.96 
  -3  -4   4   25.16    0.98 
   3   4   4   23.88    0.79 
   3   4   4   22.50    1.19 
  -7   3   4   24.82    0.99 
   7  -3   4   24.77    1.14 
  -3  -4   4   25.20    0.81 
   4  -7   4   24.53    1.04 
  -4   7   4   24.42    0.92 
  -3   7  -4   27.37    1.15 
   7  -4  -4   26.20    0.96 
  -4  -3  -4   28.88    0.90 
  -7   4  -4   25.66    1.03 
   3  -7  -4   27.97    1.02 
  -4  -3  -4   26.87    1.02 
   4   3  -4   27.18    1.09 
   7  -4  -4   26.76    1.15 
   3  -7  -4   26.49    1.21 
   4   3  -4   25.13    0.99 
  -3   7  -4   28.00    0.99 
  -3   7   4   28.02    0.99 
   7  -4   4   26.90    1.17 
  -7   4   4   27.20    0.86 
  -4  -3   4   26.39    0.84 
   4   3   4   26.57    1.31 
  -7   4   4   27.89    1.03 
   7  -4   4   27.47    0.85 
  -4  -3   4   28.00    1.04 
   3  -7   4   26.54    1.08 
   7  -5  -4  101.30    3.12 
  -7   5  -4  101.26    2.62 
   7  -5  -4  101.57    2.77 
  -2   7  -4  100.33    2.73 
  -5  -2  -4  102.01    2.86 
  -7   5  -4  100.39    2.92 
   2  -7  -4  105.15    2.84 
   5   2  -4  100.96    2.86 
   5   2  -4  105.65    3.08 
  -2   7  -4  101.57    3.06 
  -5  -2  -4  105.67    2.79 
   2  -7  -4   99.61    3.22 
  -7   5   4  104.72    2.63 
   5   2   4  106.71    3.39 
  -7   5   4  103.08    2.87 
  -5  -2   4  100.37    2.91 
  -2   7   4  102.58    2.73 
   2  -7   4  100.80    3.03 
   7  -5   4   96.54    3.12 
  -7   6  -4   17.48    0.82 
  -7   6  -4   16.11    0.68 
   1  -7  -4   16.29    0.74 
   6   1  -4   16.15    0.77 
  -1   7  -4   16.73    0.74 
   6   1  -4   19.13    0.92 
   7  -6  -4   16.94    0.91 
   7  -6  -4   16.02    0.69 
  -6  -1  -4   16.54    0.71 
  -6  -1  -4   16.52    0.77 
  -1   7  -4   16.45    0.84 
  -7   6   4   17.14    0.74 
  -7   6   4   17.34    0.70 
   6   1   4   16.58    1.04 
   7  -6   4   18.20    0.91 
  -1   7   4   16.16    0.73 
   1  -7   4   16.54    0.80 
  -6  -1   4   16.49    0.79 
   1  -7   4   15.74    0.64 
  -1   7   4   15.28    0.93 
   7   0  -4   20.54    0.93 
   7  -7  -4   23.31    0.87 
  -7   7  -4   22.80    0.99 
  -7   0  -4   22.01    0.90 
   0   7  -4   21.37    0.87 
  -7   0  -4   22.44    0.92 
   0  -7  -4   21.74    0.93 
   0   7  -4   22.08    1.00 
   7   0  -4   23.75    1.12 
  -7   7  -4   21.82    0.86 
   7  -7  -4   21.76    1.10 
   0  -7   4   23.56    1.02 
  -7   7   4   23.17    0.89 
   0  -7   4   22.08    0.85 
   7   0   4   21.28    1.21 
   0   7   4   23.15    0.89 
  -7   0   4   20.95    0.95 
   7  -7   4   21.13    1.05 
   0   7   4   23.33    1.22 
  -7   7   4   22.42    0.88 
  -8   1  -4   70.46    2.16 
   7  -8  -4   73.74    2.55 
   8  -1  -4   72.67    2.50 
   1   7  -4   74.30    2.26 
   1   7  -4   71.99    2.37 
   8  -1  -4   72.91    2.23 
   1   7  -4   68.72    2.14 
  -7   8  -4   73.51    2.11 
  -7   8  -4   72.59    2.29 
  -8   1  -4   73.16    2.25 
  -1  -7  -4   73.09    2.22 
   1   7  -4   71.30    2.06 
   1   7   4   69.60    2.60 
   1   7   4   73.53    2.06 
  -7   8   4   73.82    2.11 
   8  -1   4   72.19    2.68 
  -8   1   4   70.48    2.27 
   7  -8   4   76.00    2.48 
   8  -2  -4   14.59    0.74 
   8  -2  -4   14.54    0.89 
   2   6  -4   14.88    0.66 
  -6   8  -4   14.14    0.72 
   6  -8  -4   14.05    0.89 
  -2  -6  -4   14.05    0.74 
   2   6  -4   14.21    0.72 
  -8   2  -4   14.35    0.75 
  -6   8  -4   14.06    0.78 
  -8   2  -4   14.43    0.69 
   2   6  -4   12.37    0.79 
  -8   2   4   14.64    0.78 
  -2  -6   4   13.15    0.71 
   2   6   4   13.80    0.95 
   2   6   4   15.75    0.65 
   8  -2   4   17.79    1.07 
   6  -8   4   15.29    0.84 
  -6   8   4   14.31    0.72 
   5  -8  -4   14.36    0.88 
   8  -3  -4   13.62    0.69 
  -5   8  -4   12.75    0.75 
   3   5  -4   14.15    0.76 
  -8   3  -4   14.03    0.63 
  -3  -5  -4   13.89    0.72 
  -8   3  -4   12.80    0.71 
   5  -8  -4   13.96    0.73 
  -5   8  -4   12.28    0.68 
   3   5  -4   14.52    0.71 
   8  -3  -4   14.59    0.86 
   3   5   4   12.89    0.90 
  -5   8   4   13.34    0.69 
  -8   3   4   13.56    0.74 
  -3  -5   4   14.71    0.61 
   8  -3   4   13.67    0.90 
   5  -8   4   13.46    0.78 
  -3  -5   4   14.27    0.72 
   4   4  -4  114.26    3.26 
   4  -8  -4  123.05    3.69 
  -4  -4  -4  114.82    3.27 
   8  -4  -4  115.20    3.58 
  -8   4  -4  116.16    3.33 
   4  -8  -4  123.36    3.31 
   8  -4  -4  117.30    3.20 
  -4   8  -4  116.89    3.42 
  -4   8  -4  121.79    3.16 
   4   4  -4  123.82    3.50 
  -8   4   4  115.82    3.32 
  -4  -4   4  116.64    3.30 
   4  -8   4  113.32    3.49 
   8  -4   4  115.24    3.65 
  -4   8   4  119.59    3.14 
   4   4   4  108.84    3.75 
   8  -5  -4   41.95    1.65 
  -3   8  -4   41.88    1.63 
  -8   5  -4   40.50    1.48 
  -5  -3  -4   41.58    1.45 
   5   3  -4   42.01    1.57 
   3  -8  -4   45.27    1.76 
   5   3  -4   41.19    1.45 
   3  -8  -4   42.01    1.43 
   8  -5  -4   41.25    1.37 
  -3   8  -4   41.69    1.41 
  -5  -3  -4   43.25    1.33 
  -3   8   4   43.07    1.41 
  -8   5   4   42.49    1.47 
   3  -8   4   43.01    1.57 
   8  -5   4   45.08    1.71 
  -5  -3   4   40.65    1.46 
  -8   5   4   44.60    1.28 
   5   3   4   42.54    1.83 
   6   2  -4   19.10    0.90 
  -6  -2  -4   18.87    0.89 
  -2   8  -4   20.89    1.02 
   8  -6  -4   21.64    1.09 
   2  -8  -4   18.23    0.84 
   8  -6  -4   20.64    0.81 
  -2   8  -4   20.94    0.89 
   2  -8  -4   21.29    1.14 
  -8   6  -4   20.83    0.95 
  -6  -2  -4   19.50    0.80 
  -8   6  -4   20.18    0.77 
   6   2  -4   20.36    1.00 
   8  -6   4   20.30    1.05 
  -6  -2   4   20.73    0.92 
  -8   6   4   20.20    0.78 
  -8   6   4   18.88    0.87 
   6   2   4   16.93    1.14 
   2  -8   4   19.22    0.94 
  -2   8   4   19.75    0.86 
   7   1  -4   69.03    2.19 
  -7  -1  -4   68.11    2.12 
  -1   8  -4   71.16    2.28 
   1  -8  -4   70.13    2.14 
   7   1  -4   73.94    2.45 
   8  -7  -4   71.74    2.48 
  -8   7  -4   70.26    2.00 
  -7  -1  -4   71.64    2.18 
  -1   8  -4   72.20    2.08 
  -8   7  -4   71.89    2.26 
  -1   8   4   73.39    2.09 
  -8   7   4   71.80    2.02 
   8  -7   4   69.54    2.43 
   1  -8   4   70.09    2.33 
  -7  -1   4   70.45    2.23 
   7   1   4   70.68    2.68 
  -8   7   4   68.79    2.16 
  -1   8   4   72.48    2.58 
  -8   8  -4   18.81    0.84 
   8   0  -4   20.11    1.10 
   0   8  -4   17.88    0.85 
   0   8  -4   20.11    0.95 
  -8   8  -4   19.68    0.96 
   8   0  -4   18.30    0.92 
   8  -8  -4   20.76    1.14 
   0  -8  -4   19.32    0.90 
  -8   0  -4   18.01    0.87 
  -8   0  -4   20.97    0.93 
   0  -8   4   19.67    1.00 
  -8   8   4   20.19    0.87 
   0   8   4   20.72    1.18 
   8  -8   4   19.11    1.05 
   8   0   4   18.08    1.20 
  -8   0   4   19.10    0.95 
  -8   8   4   18.90    0.84 
   0   8   4   17.35    0.82 
   9  -1  -4   18.59    1.11 
  -8   9  -4   18.66    0.99 
  -1  -8  -4   18.46    0.93 
   8  -9  -4   16.49    1.08 
   1   8  -4   18.17    0.85 
  -9   1  -4   19.72    0.95 
  -8   9  -4   18.27    0.88 
  -9   1  -4   16.59    0.86 
   9  -1  -4   18.60    0.94 
  -1  -8   4   17.97    0.84 
  -1  -8   4   17.55    0.98 
   8  -9   4   18.91    1.07 
   1   8   4   19.72    1.23 
   1   8   4   18.37    0.84 
  -8   9   4   18.36    0.87 
   9  -1   4   17.26    1.22 
  -9   1   4   18.27    0.97 
  -7   9  -4   18.81    0.97 
  -9   2  -4   19.22    0.87 
   7  -9  -4   19.01    1.14 
   2   7  -4   18.67    0.97 
  -2  -7  -4   19.24    0.93 
   9  -2  -4   19.30    1.12 
  -9   2  -4   18.96    0.94 
   9  -2  -4   19.06    0.92 
   2   7  -4   20.76    0.92 
  -7   9  -4   19.57    0.90 
   2   7  -4   19.18    0.83 
   7  -9   4   16.32    1.00 
   2   7   4   17.84    1.14 
  -7   9   4   19.63    0.91 
  -2  -7   4   21.15    0.93 
  -9   2   4   20.01    0.97 
   9  -2   4   19.73    1.24 
  -3  -6  -4   67.23    2.10 
  -6   9  -4   66.13    2.00 
   3   6  -4   64.01    2.21 
   9  -3  -4   66.81    2.37 
   9  -3  -4   67.20    2.06 
  -6   9  -4   62.49    2.14 
   3   6  -4   64.28    2.06 
  -9   3  -4   64.82    2.11 
   6  -9  -4   67.88    2.44 
   6  -9   4   66.23    2.29 
  -9   3   4   65.82    2.15 
   3   6   4   61.20    2.45 
  -6   9   4   66.09    2.01 
  -3  -6   4   67.06    2.09 
   9  -3   4   64.78    2.48 
  -9   4  -4   11.93    0.74 
   4   5  -4   12.59    0.73 
   9  -4  -4   12.18    0.88 
   5  -9  -4   13.34    0.93 
   4   5  -4   12.25    0.79 
   9  -4  -4   13.10    0.70 
  -4  -5  -4   12.99    0.74 
  -5   9  -4   12.76    0.83 
  -5   9  -4   13.52    0.75 
   4   5   4   12.26    0.96 
  -4  -5   4   13.75    0.73 
   5  -9   4   12.11    0.79 
   9  -4   4   14.51    0.96 
  -9   4   4   15.23    0.80 
  -5   9   4   13.55    0.74 
   4  -9  -4   26.69    1.34 
  -4   9  -4   24.49    1.22 
  -5  -4  -4   25.35    1.08 
   5   4  -4   23.53    1.12 
   5   4  -4   25.61    1.08 
  -9   5  -4   23.65    1.08 
   9  -5  -4   26.42    1.27 
  -4   9  -4   25.99    1.06 
   9  -5  -4   24.93    0.99 
   9  -5   4   22.63    1.23 
  -4   9   4   24.54    1.03 
  -5  -4   4   26.23    1.08 
  -9   5   4   25.10    1.10 
   4  -9   4   24.32    1.15 
   5   4   4   25.92    1.41 
  -3   9  -4   72.80    2.23 
   6   3  -4   77.70    2.55 
  -9   6  -4   78.58    2.41 
   6   3  -4   75.54    2.36 
   3  -9  -4   70.45    2.26 
   3  -9  -4   75.56    2.71 
  -3   9  -4   75.43    2.52 
   9  -6  -4   76.54    2.64 
  -6  -3  -4   76.98    2.35 
   9  -6  -4   78.20    2.22 
   9  -6   4   73.90    2.64 
   3  -9   4   75.80    2.50 
  -6  -3   4   73.26    2.35 
   6   3   4   75.04    2.81 
  -3   9   4   76.91    2.25 
  -9   6   4   77.69    2.35 
   9  -7  -4   13.68    0.93 
  -7  -2  -4   12.20    0.66 
   7   2  -4   12.06    0.75 
   2  -9  -4   12.36    0.71 
  -2   9  -4   12.47    0.74 
  -7  -2  -4   11.47    0.73 
   2  -9  -4   11.57    0.90 
  -9   7  -4   12.33    0.79 
   7   2  -4   14.17    0.87 
   9  -7   4   12.34    0.88 
  -9   7   4   11.26    0.62 
  -2   9   4   13.57    0.74 
  -7  -2   4   12.23    0.76 
  -9   7   4   12.03    0.73 
   7   2   4   12.30    1.01 
   2  -9   4   11.90    0.77 
  -9   8  -4   14.87    0.74 
   8   1  -4   15.68    0.88 
   8   1  -4   15.65    1.00 
  -1   9  -4   16.60    0.84 
  -8  -1  -4   15.34    0.80 
  -8  -1  -4   16.31    0.87 
   1  -9  -4   15.01    0.80 
   9  -8  -4   15.75    1.04 
  -9   8  -4   15.84    0.90 
   9  -8   4   16.36    1.03 
  -1   9   4   15.61    1.07 
   8   1   4   14.77    1.15 
  -8  -1   4   14.30    0.85 
  -1   9   4   15.35    0.81 
   1  -9   4   16.00    0.92 
  -9   8   4   16.38    0.77 
  -9   8   4   14.49    0.81 
  -9   0  -4   68.67    2.21 
   9  -9  -4   65.67    2.55 
  -9   9  -4   65.67    2.28 
  -9   0  -4   68.09    2.20 
   0   9  -4   65.27    2.06 
   9   0  -4   69.33    2.25 
   0  -9  -4   71.49    2.19 
  -9   9  -4   71.12    2.08 
   0   9   4   66.77    2.07 
   0   9   4   67.92    2.64 
   0  -9   4   71.06    2.41 
   9  -9   4   67.83    2.50 
  -9   9   4   68.68    2.08 
  -9   0   4   66.64    2.27 
   9   0   4   68.43    2.76 
  -9  10  -4    8.63    0.76 
  -9  10  -4   10.08    0.69 
  10  -1  -4    8.94    0.74 
  -1  -9  -4    9.02    0.70 
   9 -10  -4    7.96    0.88 
 -10   1  -4    8.27    0.69 
 -10   1  -4    8.45    0.68 
   1   9   4    9.33    0.92 
   9 -10   4    7.80    0.80 
  -1  -9   4    9.07    0.76 
  10  -1   4    8.73    1.02 
 -10   1   4    9.27    0.76 
  -9  10   4    8.85    0.69 
  10  -2  -4   73.43    2.35 
 -10   2  -4   73.49    2.39 
   2   8  -4   74.41    2.54 
  -2  -8  -4   72.72    2.36 
  10  -2  -4   71.24    2.68 
   8 -10  -4   74.18    2.76 
 -10   2  -4   76.04    2.29 
  -8  10  -4   73.07    2.24 
  -8  10  -4   73.54    2.44 
   2   8   4   71.71    2.81 
  10  -2   4   75.00    2.92 
 -10   2   4   71.69    2.42 
  -8  10   4   73.68    2.27 
  -2  -8   4   72.32    2.29 
   8 -10   4   72.18    2.62 
  10  -3  -4   24.34    1.09 
   3   7  -4   22.50    1.21 
  -3  -7  -4   26.29    1.15 
  -7  10  -4   22.77    1.08 
   3   7  -4   24.20    1.11 
 -10   3  -4   25.32    1.15 
   7 -10  -4   24.13    1.35 
  -7  10  -4   24.40    1.17 
  10  -3  -4   24.83    1.36 
   7 -10   4   22.02    1.20 
 -10   3   4   25.47    1.18 
  -7  10   4   25.28    1.10 
  -3  -7   4   23.53    1.06 
   3   7   4   22.56    1.39 
  10  -3   4   26.62    1.53 
   6 -10  -4   11.69    0.98 
  -6  10  -4   12.87    0.87 
  10  -4  -4   11.81    0.71 
  -4  -6  -4   12.52    0.78 
   4   6  -4   12.06    0.78 
  -6  10  -4   12.62    0.78 
 -10   4  -4   13.63    0.83 
   4   6  -4   12.13    0.81 
  10  -4  -4   12.13    0.94 
  -4  -6   4   12.05    0.74 
  10  -4   4   12.19    0.99 
 -10   4   4   12.64    0.82 
  -6  10   4   12.48    0.78 
   6 -10   4   10.93    0.82 
   4   6   4   11.46    1.00 
  -5  10  -4   60.51    2.21 
   5   5  -4   58.78    2.13 
  10  -5  -4   60.82    2.31 
  10  -5  -4   59.61    1.89 
  -5  10  -4   61.21    1.93 
   5   5  -4   60.10    2.00 
   5 -10  -4   61.15    2.37 
  -5  -5  -4   59.65    2.01 
 -10   5  -4   57.58    2.03 
  -5  10   4   60.65    1.94 
   5   5   4   57.71    2.44 
 -10   5   4   62.58    2.07 
   5 -10   4   56.51    2.14 
  10  -5   4   58.65    2.35 
  -5  -5   4   58.12    1.98 
   4 -10  -4   20.01    1.22 
  -6  -4  -4   19.51    0.97 
   6   4  -4   18.56    0.96 
  -4  10  -4   19.51    0.96 
  10  -6  -4   17.29    1.13 
   6   4  -4   18.35    1.05 
 -10   6  -4   18.14    0.98 
   4 -10   4   17.75    1.03 
  -6  -4   4   17.89    0.92 
 -10   6   4   19.36    0.98 
  10  -6   4   18.46    1.18 
   6   4   4   17.51    1.25 
  -4  10   4   18.56    0.95 
  -3  10  -4   13.89    0.82 
  10  -7  -4   13.01    0.99 
   3 -10  -4   13.62    1.02 
 -10   7  -4   14.13    0.90 
  -7  -3  -4   12.10    0.79 
   7   3  -4   14.19    0.86 
  10  -7   4   12.49    0.95 
 -10   7   4   12.79    0.81 
  -3  10   4   12.57    0.77 
   7   3   4   15.44    1.19 
   3 -10   4   13.93    0.88 
  -7  -3   4   12.18    0.79 
   2 -10  -4   70.39    2.70 
  -2  10  -4   71.56    2.20 
   8   2  -4   71.88    2.34 
 -10   8  -4   69.37    2.36 
  -8  -2  -4   71.55    2.31 
  10  -8  -4   67.52    2.63 
   8   2   4   70.45    2.85 
  10  -8   4   71.47    2.64 
   2 -10   4   69.23    2.47 
 -10   8   4   70.11    2.28 
  -2  10   4   71.95    2.20 
  -8  -2   4   70.59    2.32 
   9   1  -4   17.40    1.01 
 -10   9  -4   15.76    0.98 
  -1  10  -4   17.18    0.91 
  -9  -1  -4   16.74    0.89 
   1 -10  -4   18.22    1.21 
   1 -10  -4   16.76    1.00 
  10  -9  -4   14.53    1.15 
  -9  -1  -4   15.70    0.94 
  -1  10   4   16.63    0.91 
  -9  -1   4   16.85    0.99 
   9   1   4   15.10    1.26 
   1 -10   4   18.08    1.04 
  10  -9   4   16.92    1.14 
 -10   0  -4    9.59    0.78 
  10 -10  -4   11.40    1.04 
 -10  10  -4   11.40    0.89 
 -10   0  -4   12.09    0.84 
  10   0  -4   10.45    0.87 
   0 -10  -4   10.79    0.78 
   0  10  -4   12.12    0.80 
 -10  10  -4   11.48    0.76 
   0 -10   4   12.05    0.89 
 -10   0   4   12.93    0.89 
  10 -10   4   12.02    1.00 
  10   0   4   11.42    1.17 
   0  10   4   10.87    1.02 
   0  10   4   12.89    0.82 
 -10  10   4   12.34    0.79 
  10 -11  -4   39.28    1.98 
 -10  11  -4   39.37    1.69 
 -11   1  -4   39.38    1.62 
 -11   1  -4   38.56    1.57 
 -10  11  -4   38.19    1.50 
  -1 -10  -4   38.35    1.59 
  11  -1  -4   41.01    1.67 
 -11   1   4   38.62    1.67 
  11  -1   4   37.37    2.11 
  -1 -10   4   38.81    1.75 
  10 -11   4   39.88    1.86 
 -10  11   4   42.43    1.58 
   1  10   4   40.90    2.02 
  -9  11  -4   16.81    1.07 
   9 -11  -4   20.84    1.36 
 -11   2  -4   17.44    1.04 
  11  -2  -4   19.30    1.06 
   2   9  -4   19.11    1.16 
  -9  11  -4   17.46    0.99 
  -2  -9  -4   19.58    1.06 
  11  -2   4   18.92    1.39 
 -11   2   4   17.76    1.07 
   9 -11   4   18.68    1.20 
   2   9   4   18.79    1.40 
  -9  11   4   18.60    1.01 
   8 -11  -4   18.45    1.27 
 -11   3  -4   18.82    1.06 
  -3  -8  -4   17.03    0.99 
  -8  11  -4   18.11    1.01 
  -8  11  -4   20.35    1.12 
  11  -3  -4   19.61    1.02 
   8 -11   4   20.60    1.21 
 -11   3   4   19.12    1.07 
   3   8   4   19.96    1.33 
  -3  -8   4   17.45    0.97 
  11  -3   4   19.66    1.41 
  -8  11   4   20.00    1.04 
  11  -4  -4   51.09    1.77 
   7 -11  -4   47.98    2.15 
  -4  -7  -4   51.77    1.87 
  -7  11  -4   47.96    1.74 
  11  -4  -4   52.01    2.17 
 -11   4  -4   49.14    1.86 
 -11   4   4   49.26    1.89 
  11  -4   4   47.86    2.24 
  -7  11   4   51.41    1.78 
  -4  -7   4   49.82    1.81 
   7 -11   4   48.55    2.01 
   4   7   4   47.12    2.22 
  11  -5  -4   12.15    1.05 
 -11   5  -4   12.31    0.88 
   6 -11  -4   13.00    1.09 
  -6  11  -4   13.53    0.86 
  -5  -6  -4   13.50    0.86 
   5   6  -4   12.92    0.89 
   6 -11   4   12.86    0.94 
  -5  -6   4   12.39    0.79 
  11  -5   4   14.70    1.14 
   5   6   4   13.48    1.13 
  -6  11   4   13.26    0.85 
 -11   5   4   13.77    0.90 
   5 -11  -4   23.15    1.39 
  -6  -5  -4   21.29    1.09 
 -11   6  -4   20.76    1.12 
  -5  11  -4   21.17    1.07 
  11  -6  -4   21.64    1.34 
   6   5  -4   18.95    1.07 
 -11   6   4   20.45    1.10 
  11  -6   4   22.74    1.35 
   5 -11   4   20.51    1.17 
  -5  11   4   23.14    1.09 
  -6  -5   4   20.52    1.03 
   6   5   4   20.25    1.39 
  -7  -4  -4   54.07    2.00 
   4 -11  -4   56.25    2.37 
  11  -7  -4   55.63    2.32 
   7   4  -4   56.08    2.01 
 -11   7  -4   59.08    2.09 
  -4  11  -4   57.79    1.94 
  -7  -4   4   57.30    2.00 
  11  -7   4   52.70    2.31 
 -11   7   4   57.19    2.02 
   4 -11   4   54.35    2.15 
   7   4   4   57.68    2.52 
  -4  11   4   57.39    1.94 
   3 -11  -4   12.59    1.09 
  -8  -3  -4   11.11    0.82 
  11  -8  -4   12.31    1.07 
   8   3  -4   11.81    0.88 
  -3  11  -4   11.47    0.83 
 -11   8  -4   12.02    0.90 
 -11   8   4   12.24    0.85 
  -8  -3   4   12.99    0.84 
   8   3   4   11.95    1.15 
   3 -11   4   12.21    0.90 
  -3  11   4   12.24    0.85 
  11  -8   4   12.53    1.03 
  -9  -2  -4   15.92    0.96 
 -11   9  -4   13.79    0.99 
  -2  11  -4   14.85    0.93 
  11  -9  -4   16.48    1.22 
   9   2  -4   14.51    0.97 
   2 -11  -4   15.79    1.18 
 -11   9   4   14.05    0.92 
  -2  11   4   15.11    0.93 
   9   2   4   14.40    1.26 
  -9  -2   4   16.48    0.99 
   2 -11   4   14.48    1.01 
  11  -9   4   16.54    1.16 
  10   1  -4   41.32    1.73 
  11 -10  -4   42.98    2.08 
  -1  11  -4   44.17    1.65 
 -10  -1  -4   44.98    1.73 
   1 -11  -4   39.58    2.00 
 -11  10  -4   43.00    1.78 
  -1  11   4   40.21    1.61 
  11 -10   4   44.35    2.02 
 -10  -1   4   45.18    1.78 
   1 -11   4   45.89    1.91 
  10   1   4   44.23    2.28 
 -11   0  -4   13.48    0.94 
  11 -11  -4   14.41    1.27 
 -11   0  -4   14.78    0.94 
  11   0  -4   13.24    0.99 
   0 -11  -4   12.83    1.16 
 -11  11  -4   14.33    1.05 
   0 -11   4   13.06    1.02 
  11 -11   4   13.58    1.14 
 -11   0   4   12.65    0.97 
  11   0   4   11.69    1.28 
 -11  12   4   10.57    0.97 
 -12   2  -4    8.56    0.84 
  12  -2  -4    8.37    0.83 
  10 -12  -4    9.03    1.13 
  -2 -10  -4    9.37    0.83 
 -10  12  -4    9.01    0.82 
 -10  12   4   10.32    0.81 
  12  -3  -4   47.90    1.81 
  -3  -9  -4   46.18    1.83 
 -12   3  -4   46.87    1.87 
   9 -12  -4   45.04    2.22 
  -9  12  -4   44.44    1.73 
  12  -3   4   46.91    2.38 
   3   9   4   49.43    2.28 
 -12   3   4   47.71    1.91 
  -9  12   4   48.26    1.81 
   9 -12   4   42.52    2.01 
  -4  -8  -4    5.72    0.69 
  12  -4  -4    5.85    0.67 
 -12   4  -4    7.22    0.77 
  -8  12  -4    6.15    0.70 
   8 -12  -4    5.63    0.90 
  -8  12   4    7.34    0.77 
   4   8   4    6.46    0.91 
 -12   4   4    7.62    0.82 
  12  -4   4    5.83    0.97 
   8 -12   4    5.58    0.75 
  -4  -8   4    6.89    0.69 
  -7  12  -4    9.46    0.82 
 -12   5  -4   10.75    0.87 
   7 -12  -4    9.42    1.03 
  -5  -7  -4    7.82    0.77 
  12  -5  -4    8.60    1.02 
  -5  -7   4   10.23    0.80 
   7 -12   4    9.34    0.88 
  -7  12   4   10.23    0.85 
 -12   5   4   11.05    0.89 
   5   7   4    9.59    1.06 
  12  -5   4   10.01    1.12 
  12  -6  -4   54.67    2.44 
  -6  12  -4   58.94    2.05 
   6   6  -4   62.07    2.16 
   6 -12  -4   59.11    2.55 
 -12   6  -4   59.36    2.18 
  -6  -6  -4   55.83    2.10 
   6   6   4   58.25    2.60 
   6 -12   4   58.36    2.31 
  12  -6   4   60.32    2.56 
 -12   6   4   58.66    2.16 
  -6  12   4   57.91    2.06 
  12  -7  -4   11.79    1.14 
   7   5  -4   11.71    0.93 
 -12   7  -4   13.23    0.96 
  -7  -5  -4   11.14    0.88 
  -5  12  -4   12.45    0.93 
   5 -12  -4   13.56    1.17 
  -5  12   4   11.40    0.92 
   5 -12   4   11.85    0.95 
  -7  -5   4   12.80    0.86 
   7   5   4   12.93    1.18 
  12  -7   4   12.42    1.10 
 -12   7   4   12.24    0.93 
   8   4  -4   12.32    0.97 
   4 -12  -4   12.82    1.16 
 -12   8  -4   12.25    0.98 
  12  -8  -4   12.05    1.14 
  -4  12  -4   12.37    0.93 
  -8  -4  -4   14.35    0.96 
  -4  12   4   14.64    0.98 
 -12   8   4   12.44    0.93 
   8   4   4   12.54    1.23 
  12  -8   4   14.22    1.19 
  -8  -4   4   13.25    0.89 
   4 -12   4   12.50    1.01 
   3 -12  -4   40.46    2.01 
  -9  -3  -4   38.28    1.64 
 -12   9  -4   42.51    1.76 
  12  -9  -4   40.40    2.03 
  -3  12  -4   38.16    1.59 
   9   3  -4   37.96    1.69 
   3 -12   4   39.34    1.79 
 -12   9   4   39.95    1.65 
   9   3   4   37.38    2.09 
  12  -9   4   39.17    1.94 
  -3  12   4   37.52    1.59 
  -9  -3   4   37.57    1.63 
 -12  10  -4   15.63    1.11 
 -10  -2  -4   16.04    1.04 
  12 -10  -4   16.54    1.35 
  -2  12  -4   15.73    1.03 
 -10  -2   4   14.84    1.02 
  -2  12   4   15.46    1.03 
  10   2   4   13.83    1.50 
   2 -12   4   16.11    1.12 
  -1  12  -4    6.76    0.74 
   1 -12   4    7.23    0.85 
  -4  -9   4   10.48    0.87 
  -5  -8   4   40.41    1.71 
  13  -7  -4    6.66    0.99 
   6 -13   4    6.21    0.82 
  13  -8  -4   33.27    1.90 
   5 -13   4   32.89    1.75 
  13  -9  -4    6.76    1.09 
  -9  -4   4    8.05    0.83 
   0   0  -5   -0.07    0.12 
   0   0  -5   -0.04    0.11 
   0   0   5   -0.06    0.11 
   0   0   5   -0.15    0.07 
  -1   1  -5  214.01    5.38 
   1   0  -5  220.54    5.42 
   1   0  -5  213.20    5.51 
  -1   0  -5  216.70    5.44 
  -1   1  -5  214.66    5.50 
   0  -1  -5  218.68    5.43 
   0   1  -5  211.87    5.57 
   0   1  -5  220.33    5.38 
  -1   0  -5  215.26    5.38 
   1  -1  -5  216.88    5.44 
   1  -1  -5  210.75    5.45 
   0  -1  -5  224.74    5.46 
  -1   1   5  224.18    5.18 
   0   1   5  205.31    5.68 
  -1   1   5  212.15    5.59 
  -1   0   5  215.50    5.21 
   1  -1   5  219.28    5.18 
   0  -1   5  217.46    5.18 
   1   0   5  225.66    5.22 
   0  -1   5  220.68    5.54 
   1  -1   5  219.75    5.62 
   1   0   5  216.25    5.70 
   0   1   5  219.74    5.17 
  -2   1  -5    6.00    0.29 
  -1  -1  -5    5.88    0.33 
   1  -2  -5    5.87    0.37 
   2  -1  -5    5.85    0.35 
   1   1  -5    5.57    0.31 
  -1   2  -5    5.98    0.29 
   2  -1  -5    5.63    0.25 
  -2   1  -5    6.23    0.33 
  -1  -1  -5    6.16    0.27 
   1  -2  -5    6.08    0.26 
  -1   2  -5    5.64    0.39 
   1   1  -5    5.44    0.38 
   1  -2   5    5.80    0.31 
  -2   1   5    5.58    0.31 
  -1   2   5    5.56    0.32 
   2  -1   5    6.36    0.35 
  -2   1   5    6.00    0.33 
   1   1   5    6.60    0.32 
   2  -1   5    5.42    0.31 
   1   1   5    5.50    0.38 
   1  -2   5    6.31    0.27 
  -1   2   5    5.96    0.31 
  -1  -1   5    6.45    0.34 
   2  -2  -5  105.28    2.87 
   0  -2  -5  110.10    2.84 
   2   0  -5  109.94    2.90 
   2   0  -5  108.22    2.83 
  -2   2  -5  108.17    2.76 
  -2   2  -5  107.08    2.88 
   2   0  -5  112.75    2.82 
  -2   0  -5  109.38    2.81 
   2  -2  -5  107.64    2.92 
  -2   0  -5  112.15    2.80 
   2   0   5  113.03    3.06 
   0   2   5  102.00    3.02 
  -2   0   5  106.84    2.73 
  -2   2   5  110.00    2.79 
   2   0   5  108.32    2.71 
  -2   2   5  105.49    2.68 
   0  -2   5  105.72    2.68 
   0   2   5  107.84    2.68 
   0  -2   5  111.86    2.84 
   2  -2   5  105.10    2.68 
   2  -2   5  107.72    2.93 
   1   2  -5   85.93    2.25 
   2  -3  -5   87.04    2.39 
  -2   3  -5   81.66    2.38 
  -1  -2  -5   86.31    2.31 
   1   2  -5   85.90    2.29 
  -3   1  -5   87.32    2.24 
   3  -1  -5   85.98    2.32 
   2  -3  -5   86.33    2.44 
  -2   3  -5   86.68    2.16 
   1   2  -5   83.96    2.43 
   3  -1  -5   85.40    2.33 
  -3   1  -5   85.92    2.30 
  -3   1   5   83.41    2.32 
   3  -1   5   85.10    2.20 
   2  -3   5   87.46    2.38 
  -3   1   5   86.78    2.18 
   2  -3   5   85.18    2.19 
  -2   3   5   84.09    2.19 
   1   2   5   88.94    2.16 
  -2   3   5   85.95    2.19 
   1   2   5   83.71    2.54 
   3  -1   5   85.94    2.48 
  -1  -2   5   83.72    2.17 
  -1   3  -5  118.72    2.92 
   3  -2  -5  118.22    3.15 
   1  -3  -5  116.78    3.07 
  -3   2  -5  115.42    3.08 
  -3   2  -5  119.03    2.93 
   3  -2  -5  119.06    3.06 
   2   1  -5  112.81    3.13 
   2   1  -5  113.32    3.01 
  -2  -1  -5  120.01    2.98 
  -2  -1  -5  119.44    3.03 
  -1   3  -5  111.26    3.21 
   2   1  -5  117.26    3.06 
   2   1   5  113.89    2.85 
   3  -2   5  114.84    2.87 
  -3   2   5  112.41    3.03 
   1  -3   5  114.28    2.89 
  -2  -1   5  118.70    2.92 
   1  -3   5  119.30    3.12 
  -1   3   5  114.23    2.90 
  -3   2   5  115.79    2.87 
   2   1   5  121.62    3.35 
   3  -2   5  118.15    3.22 
  -1   3   5  113.76    3.29 
   3   0  -5   11.14    0.44 
   3  -3  -5   10.77    0.50 
   3  -3  -5   10.04    0.52 
   0   3  -5    9.08    0.56 
  -3   3  -5   10.13    0.37 
   3   0  -5   10.18    0.47 
   0   3  -5   10.77    0.42 
  -3   0  -5   10.50    0.45 
   0  -3  -5   11.19    0.50 
  -3   0  -5   10.68    0.44 
  -3   3  -5    9.49    0.49 
   3   0   5   11.16    0.60 
   3   0   5    9.86    0.43 
   0  -3   5   10.48    0.45 
   3  -3   5   10.60    0.49 
  -3   0   5   10.33    0.49 
  -3   3   5    8.63    0.43 
   3  -3   5   10.89    0.45 
  -3   0   5    9.97    0.46 
   0  -3   5   10.14    0.42 
  -3   3   5   11.05    0.42 
   0   3   5   10.64    0.58 
   0   3   5   10.60    0.44 
  -4   1  -5  117.50    3.15 
  -3   4  -5  116.05    3.23 
  -1  -3  -5  118.99    3.16 
  -3   4  -5  121.24    2.99 
   1   3  -5  121.15    3.09 
   1   3  -5  116.53    3.30 
   3  -4  -5  119.18    3.37 
   1   3  -5  121.54    3.22 
   4  -1  -5  120.98    3.15 
   4  -1  -5  118.99    3.26 
  -4   1  -5  117.36    3.07 
   3  -4  -5  117.26    3.23 
  -4   1   5  119.16    2.94 
   1   3   5  121.01    2.96 
  -3   4   5  123.50    3.05 
   4  -1   5  121.90    2.99 
  -4   1   5  114.06    3.19 
   1   3   5  113.95    3.48 
  -3   4   5  116.52    2.99 
  -1  -3   5  120.91    2.98 
   4  -1   5  124.43    3.46 
   3  -4   5  124.17    3.32 
   2   2  -5    0.72    0.19 
  -2   4  -5    0.64    0.15 
   4  -2  -5    0.37    0.16 
   2   2  -5    0.62    0.13 
  -2  -2  -5    0.99    0.12 
  -2  -2  -5    0.41    0.15 
   4  -2  -5    0.52    0.15 
  -2   4  -5    0.70    0.10 
  -2   4  -5    0.71    0.21 
   2   2  -5    0.51    0.15 
   2  -4  -5    0.69    0.20 
  -4   2  -5    0.71    0.17 
   2  -4  -5    0.74    0.20 
  -4   2  -5    0.70    0.14 
  -2   4   5    0.49    0.15 
  -2  -2   5    0.98    0.17 
   2   2   5    0.71    0.24 
   4  -2   5    0.66    0.14 
  -4   2   5    0.51    0.14 
  -4   2   5    0.62    0.16 
   4  -2   5    0.55    0.18 
   2  -4   5    0.63    0.15 
   2   2   5    0.62    0.13 
   3   1  -5  152.75    4.00 
   1  -4  -5  149.31    3.88 
  -4   3  -5  148.91    3.70 
   4  -3  -5  150.01    4.07 
  -1   4  -5  153.72    3.73 
  -3  -1  -5  148.93    3.85 
  -1   4  -5  147.70    3.67 
   4  -3  -5  150.41    3.89 
  -4   3  -5  151.05    3.94 
  -3  -1  -5  150.68    3.82 
  -1   4  -5  149.37    4.10 
   3   1  -5  147.41    3.85 
  -1   4   5  152.22    4.23 
  -3  -1   5  145.44    3.96 
   4  -3   5  145.16    3.64 
  -4   3   5  148.73    3.65 
  -3  -1   5  149.09    3.70 
   1  -4   5  148.76    4.01 
   3   1   5  150.92    4.29 
   3   1   5  151.85    3.60 
  -4   3   5  143.33    3.86 
   4  -3   5  150.00    4.12 
  -1   4   5  153.41    3.69 
   0  -4  -5   70.89    2.00 
   0   4  -5   70.82    1.89 
   4  -4  -5   73.16    2.04 
   4  -4  -5   70.77    2.13 
   4   0  -5   75.76    2.08 
   0   4  -5   65.88    2.13 
  -4   0  -5   67.20    1.93 
  -4   4  -5   68.55    2.03 
  -4   0  -5   71.13    1.95 
   4   0  -5   71.44    1.99 
  -4   0   5   68.72    2.03 
  -4   4   5   70.68    1.92 
   4  -4   5   71.12    1.87 
   4   0   5   71.45    1.81 
   4  -4   5   69.37    2.11 
   0  -4   5   71.25    1.88 
   4   0   5   69.93    2.27 
   0  -4   5   71.55    2.02 
  -4   4   5   71.11    1.88 
  -4   0   5   70.14    1.85 
   0   4   5   67.85    1.86 
   0   4   5   66.63    2.23 
  -5   1  -5   -0.05    0.12 
  -4   5  -5   -0.17    0.13 
   1   4  -5    0.20    0.13 
   4  -5  -5    0.09    0.15 
   5  -1  -5    0.11    0.13 
  -5   1  -5    0.13    0.12 
   5  -1  -5    0.49    0.18 
   1   4  -5    0.00    0.11 
  -1  -4  -5    0.04    0.13 
   4  -5  -5   -0.04    0.15 
  -4   5  -5   -0.01    0.12 
   1   4  -5   -0.09    0.15 
  -5   1   5   -0.09    0.11 
   1   4   5    0.10    0.11 
  -5   1   5    0.03    0.10 
  -4   5   5    0.23    0.16 
   1   4   5    0.19    0.19 
  -4   5   5   -0.01    0.09 
   5  -1   5    0.27    0.21 
   4  -5   5   -0.05    0.11 
  -1  -4   5    0.00    0.10 
   5  -1   5    0.27    0.12 
   5  -2  -5  151.68    4.17 
   3  -5  -5  155.50    4.05 
   2   3  -5  150.95    4.09 
  -2  -3  -5  158.02    3.81 
   5  -2  -5  149.36    3.95 
  -2  -3  -5  151.60    3.96 
   3  -5  -5  147.14    4.27 
   2   3  -5  154.49    4.09 
  -3   5  -5  149.08    4.09 
   2   3  -5  153.71    3.92 
  -5   2  -5  151.03    4.00 
  -5   2  -5  148.14    3.83 
  -3   5  -5  152.10    3.78 
   3  -5   5  154.06    4.18 
  -3   5   5  142.05    3.81 
  -2  -3   5  152.86    3.72 
  -5   2   5  152.12    3.67 
   2   3   5  154.03    4.43 
   5  -2   5  153.24    3.70 
  -5   2   5  150.60    4.01 
   2   3   5  152.82    3.69 
  -3   5   5  151.92    3.78 
   5  -2   5  156.49    4.31 
  -3  -2  -5  143.10    3.80 
  -2   5  -5  143.04    3.63 
   5  -3  -5  146.90    4.03 
   2  -5  -5  147.88    4.17 
   5  -3  -5  146.94    3.80 
   3   2  -5  148.86    3.95 
  -5   3  -5  144.05    3.64 
   3   2  -5  141.27    3.78 
  -2   5  -5  154.42    3.61 
  -2   5  -5  144.52    4.03 
   2  -5  -5  145.41    3.84 
  -3  -2  -5  148.47    3.72 
  -5   3  -5  142.80    3.87 
  -2   5   5  144.27    3.64 
  -5   3   5  142.10    3.83 
   5  -3   5  149.12    4.11 
  -3  -2   5  145.25    3.91 
   3   2   5  143.48    3.51 
  -5   3   5  144.07    3.56 
  -3  -2   5  141.14    3.56 
   2  -5   5  145.18    3.99 
   5  -3   5  151.15    3.57 
   3   2   5  145.37    4.28 
  -4  -1  -5   10.00    0.45 
  -5   4  -5   10.42    0.36 
   5  -4  -5   11.04    0.53 
   5  -4  -5   10.42    0.57 
  -1   5  -5    9.93    0.42 
  -4  -1  -5   10.23    0.50 
  -1   5  -5   11.10    0.51 
   4   1  -5    9.87    0.52 
  -1   5  -5    9.22    0.62 
  -5   4  -5   10.11    0.54 
   4   1  -5   10.08    0.52 
   1  -5  -5   10.03    0.53 
  -5   4   5   10.28    0.47 
  -5   4   5    9.65    0.48 
   4   1   5   10.07    0.39 
   5  -4   5   12.04    0.49 
   4   1   5   10.87    0.71 
  -4  -1   5    9.55    0.47 
   5  -4   5   10.32    0.58 
   1  -5   5   10.21    0.51 
  -1   5   5   10.38    0.65 
  -4  -1   5   10.11    0.55 
   5   0  -5   83.49    2.44 
  -5   5  -5   79.20    2.37 
   5   0  -5   78.27    2.29 
  -5   5  -5   80.17    2.16 
  -5   0  -5   81.59    2.26 
   0  -5  -5   84.04    2.32 
  -5   0  -5   81.31    2.27 
   0   5  -5   81.67    2.18 
   0   5  -5   83.68    2.20 
   5  -5  -5   81.30    2.31 
   5  -5  -5   80.29    2.50 
   0   5  -5   77.68    2.45 
   5  -5   5   84.23    2.49 
   0  -5   5   78.51    2.36 
  -5   5   5   85.41    2.20 
   0   5   5   80.83    2.62 
  -5   0   5   78.29    2.35 
  -5   0   5   83.44    2.08 
   5   0   5   83.99    2.66 
  -5   5   5   80.06    2.23 
   5   0   5   81.76    2.03 
   0   5   5   83.13    2.18 
   1   5  -5   80.88    2.50 
   5  -6  -5   83.31    2.43 
   1   5  -5   85.28    2.33 
   6  -1  -5   90.33    2.60 
  -5   6  -5   81.62    2.27 
  -5   6  -5   82.69    2.46 
   5  -6  -5   83.39    2.64 
   1   5  -5   84.00    2.49 
  -1  -5  -5   84.34    2.42 
   6  -1  -5   84.23    2.40 
  -6   1  -5   86.35    2.34 
  -6   1  -5   84.38    2.40 
   1   5  -5   85.17    2.24 
  -1  -5   5   82.35    2.24 
  -6   1   5   82.31    2.46 
   1   5   5   84.19    2.79 
   5  -6   5   87.27    2.60 
  -5   6   5   85.20    2.29 
   1   5   5   86.07    2.24 
   6  -1   5   84.73    2.76 
  -5   6   5   84.24    2.29 
   2   4  -5   78.96    2.32 
   6  -2  -5   76.82    2.36 
   2   4  -5   76.65    2.17 
  -6   2  -5   78.55    2.23 
  -4   6  -5   76.39    2.31 
  -4   6  -5   74.74    2.10 
   4  -6  -5   77.53    2.29 
   6  -2  -5   75.24    2.19 
  -2  -4  -5   75.76    2.21 
  -6   2  -5   76.34    2.10 
   2   4  -5   79.27    2.29 
   4  -6  -5   75.21    2.45 
   2   4   5   78.26    2.03 
   2   4   5   73.02    2.56 
   6  -2   5   79.41    2.03 
   4  -6   5   77.96    2.36 
   6  -2   5   76.11    2.49 
  -4   6   5   75.56    2.11 
  -2  -4   5   76.14    2.04 
  -6   2   5   77.09    1.96 
  -4   6   5   79.07    2.06 
  -6   2   5   78.16    2.27 
   3   3  -5    0.47    0.18 
  -6   3  -5    0.91    0.17 
  -6   3  -5    0.48    0.19 
   6  -3  -5    0.91    0.22 
   3   3  -5    0.57    0.19 
   3  -6  -5    0.76    0.21 
  -3   6  -5    0.91    0.22 
  -3   6  -5    1.06    0.27 
   6  -3  -5    1.03    0.25 
  -3  -3  -5    0.83    0.20 
  -3  -3  -5    0.55    0.13 
   3  -6  -5    1.13    0.28 
   6  -3   5    0.83    0.25 
   3   3   5    1.11    0.17 
  -6   3   5    0.64    0.20 
   3  -6   5    1.13    0.23 
   6  -3   5    0.80    0.16 
  -3  -3   5    0.72    0.16 
   3   3   5    0.89    0.28 
  -6   3   5    0.61    0.15 
  -3   6   5    0.69    0.19 
  -3  -3   5    0.70    0.22 
   6  -4  -5   54.68    1.84 
   4   2  -5   53.24    1.75 
   6  -4  -5   56.75    1.69 
  -6   4  -5   55.29    1.75 
  -2   6  -5   56.00    1.63 
  -2   6  -5   55.40    1.91 
  -4  -2  -5   54.77    1.70 
  -4  -2  -5   63.53    1.63 
   2  -6  -5   54.10    1.96 
   2  -6  -5   55.63    1.72 
   6  -4   5   57.82    1.90 
   4   2   5   59.74    1.48 
  -4  -2   5   54.31    1.76 
  -2   6   5   55.73    1.63 
  -4  -2   5   57.76    1.57 
   6  -4   5   57.45    1.56 
   2  -6   5   54.77    1.77 
   4   2   5   54.18    2.05 
  -6   4   5   54.95    1.70 
  -6   4   5   57.12    1.56 
  -6   5  -5   90.37    2.60 
   6  -5  -5   89.68    2.50 
   6  -5  -5   85.69    2.74 
   5   1  -5   89.22    2.67 
   1  -6  -5   88.66    2.53 
  -1   6  -5   91.70    2.37 
  -5  -1  -5   91.42    2.47 
  -6   5  -5   89.28    2.34 
  -1   6  -5   88.69    2.72 
  -1   6  -5   89.53    2.40 
  -5  -1  -5   89.18    2.50 
   5   1  -5   88.52    2.53 
  -1   6   5   90.77    2.41 
   6  -5   5   87.11    2.74 
   5   1   5   88.54    2.94 
  -6   5   5   88.64    2.49 
  -5  -1   5   89.08    2.60 
   1  -6   5   89.49    2.64 
  -6   5   5   91.57    2.37 
  -1   6   5   87.98    2.86 
  -5  -1   5   87.75    2.38 
   6  -5   5   92.05    2.36 
   0  -6  -5    0.07    0.16 
   0   6  -5    0.15    0.20 
   6  -6  -5   -0.13    0.17 
   0   6  -5   -0.13    0.14 
  -6   0  -5    0.17    0.15 
  -6   6  -5    0.06    0.16 
   6  -6  -5    0.23    0.17 
   0   6  -5    0.12    0.14 
  -6   0  -5   -0.06    0.15 
   6   0  -5    0.02    0.16 
   6   0  -5    0.44    0.21 
  -6   6  -5   -0.11    0.18 
   6   0   5   -0.22    0.20 
  -6   6   5   -0.02    0.15 
   6  -6   5   -0.11    0.16 
   0   6   5    0.19    0.14 
   0   6   5   -0.01    0.20 
   0  -6   5    0.16    0.15 
  -6   0   5    0.08    0.17 
  -6   6   5    0.21    0.15 
  -7   1  -5   95.03    2.73 
   1   6  -5   98.17    2.86 
  -1  -6  -5   96.26    2.75 
   7  -1  -5   96.10    2.73 
   7  -1  -5   96.40    2.96 
  -7   1  -5   94.99    2.67 
   6  -7  -5   93.32    3.02 
   1   6  -5   92.97    2.64 
   1   6  -5   97.54    2.86 
   6  -7  -5   97.75    2.72 
   1   6  -5   95.25    2.55 
  -6   7  -5   91.46    2.57 
   7  -1   5   97.56    3.17 
  -6   7   5   93.27    2.59 
  -6   7   5   96.85    2.63 
   6  -7   5   95.79    2.96 
   1   6   5   98.99    2.55 
  -7   1   5   91.39    2.79 
   7  -2  -5    2.41    0.34 
  -5   7  -5    1.87    0.33 
   2   5  -5    1.58    0.30 
   5  -7  -5    1.67    0.36 
   7  -2  -5    1.80    0.35 
   2   5  -5    1.92    0.29 
   2   5  -5    2.11    0.35 
   5  -7  -5    1.90    0.33 
  -7   2  -5    2.25    0.33 
  -2  -5  -5    1.66    0.29 
  -7   2  -5    1.60    0.25 
  -5   7  -5    1.51    0.27 
   2   5   5    2.28    0.43 
   7  -2   5    2.08    0.41 
  -5   7   5    2.01    0.30 
   5  -7   5    2.32    0.35 
  -2  -5   5    2.11    0.27 
  -7   2   5    1.43    0.29 
   2   5   5    1.72    0.25 
   4  -7  -5  102.73    2.89 
  -7   3  -5   98.99    2.84 
   7  -3  -5  100.53    3.02 
  -7   3  -5   98.89    2.65 
   4  -7  -5   98.27    3.13 
   3   4  -5   99.49    2.78 
   7  -3  -5   99.38    2.79 
   3   4  -5  101.58    2.92 
  -4   7  -5   98.52    2.68 
  -4   7  -5  100.11    2.95 
  -3  -4  -5   97.58    2.81 
   3   4   5   98.12    3.25 
  -3  -4   5   98.05    2.88 
   7  -3   5   97.57    3.13 
  -7   3   5   97.31    2.85 
   3   4   5  103.24    2.55 
  -4   7   5  101.19    2.69 
   4  -7   5  101.58    3.00 
  -7   3   5  100.67    2.52 
  -3  -4   5   99.30    2.57 
  -7   4  -5   70.71    2.16 
   7  -4  -5   70.47    2.08 
   4   3  -5   70.56    2.11 
   3  -7  -5   67.35    2.39 
  -3   7  -5   73.90    2.05 
   3  -7  -5   70.78    2.14 
  -4  -3  -5   74.65    1.98 
   7  -4  -5   72.34    2.31 
  -4  -3  -5   70.16    2.11 
  -3   7  -5   69.67    2.31 
   4   3  -5   72.96    2.22 
  -3   7   5   71.90    2.03 
   4   3   5   70.73    2.53 
   3  -7   5   71.61    2.24 
  -7   4   5   72.24    1.90 
  -4  -3   5   70.26    1.89 
  -7   4   5   68.87    2.12 
   7  -4   5   71.98    1.90 
  -4  -3   5   71.05    2.18 
   7  -4   5   67.38    2.35 
  -7   5  -5    0.59    0.23 
  -2   7  -5    0.71    0.23 
   5   2  -5    0.78    0.25 
   2  -7  -5    0.88    0.24 
   7  -5  -5    0.60    0.25 
  -5  -2  -5    1.08    0.25 
   7  -5  -5    0.49    0.21 
  -2   7  -5    0.66    0.29 
  -5  -2  -5    1.27    0.22 
   2  -7  -5    0.97    0.31 
   5   2  -5    0.84    0.25 
   7  -5   5    0.59    0.18 
  -7   5   5    0.47    0.21 
   2  -7   5    1.10    0.25 
   5   2   5    0.67    0.31 
  -2   7   5    0.52    0.21 
   7  -5   5    0.35    0.22 
  -5  -2   5    0.42    0.21 
  -7   5   5    1.26    0.23 
   1  -7  -5   64.25    2.00 
  -7   6  -5   65.10    1.85 
   6   1  -5   65.26    2.16 
   7  -6  -5   67.73    1.96 
  -1   7  -5   63.36    2.16 
   7  -6  -5   62.92    2.23 
  -6  -1  -5   64.98    2.00 
  -7   6  -5   66.44    2.09 
  -1   7  -5   65.30    1.92 
   6   1  -5   69.78    2.05 
  -6  -1  -5   71.56    1.99 
  -7   6   5   66.39    1.87 
   6   1   5   67.30    2.46 
   1  -7   5   65.71    2.12 
  -7   6   5   66.22    1.98 
  -1   7   5   61.57    2.33 
  -6  -1   5   66.45    2.08 
   7  -6   5   65.74    2.23 
  -1   7   5   69.14    1.93 
   7   0  -5   70.18    2.30 
   7  -7  -5   69.57    2.03 
  -7   0  -5   69.00    2.07 
   0   7  -5   70.57    1.99 
  -7   0  -5   67.89    2.06 
   0   7  -5   67.26    1.97 
  -7   7  -5   68.11    2.18 
   0   7  -5   66.40    2.21 
   7   0  -5   68.07    2.11 
  -7   7  -5   67.34    1.96 
   7  -7  -5   70.56    2.37 
   0  -7  -5   66.56    2.08 
   7   0   5   69.08    2.54 
  -7   0   5   66.77    2.15 
  -7   7   5   67.41    1.96 
  -7   7   5   67.72    2.02 
   7  -7   5   65.62    2.29 
   0   7   5   66.41    1.96 
   0  -7   5   69.69    2.20 
   1   7  -5    0.88    0.26 
   8  -1  -5    0.65    0.30 
  -7   8  -5    0.53    0.28 
  -1  -7  -5    0.63    0.25 
   7  -8  -5    0.91    0.37 
  -7   8  -5    1.40    0.30 
   1   7  -5    1.74    0.31 
   8  -1  -5    0.74    0.29 
   1   7  -5    0.28    0.24 
  -8   1  -5    1.00    0.28 
  -8   1  -5    1.26    0.30 
  -1  -7   5    0.66    0.25 
   1   7   5    0.66    0.34 
  -7   8   5    0.98    0.28 
  -8   1   5    1.06    0.30 
   7  -8   5    0.75    0.29 
   8  -1   5    0.38    0.33 
   1   7   5    0.90    0.24 
  -8   2  -5   30.77    1.12 
   2   6  -5   30.85    1.14 
  -6   8  -5   30.63    1.15 
  -6   8  -5   30.03    1.26 
  -2  -6  -5   31.49    1.21 
   2   6  -5   30.73    1.24 
   6  -8  -5   35.26    1.49 
   8  -2  -5   31.45    1.36 
  -8   2  -5   31.55    1.20 
   8  -2  -5   31.13    1.20 
   2   6  -5   31.43    1.24 
   8  -2   5   30.62    1.48 
  -2  -6   5   31.40    1.08 
  -6   8   5   34.29    1.19 
   6  -8   5   32.47    1.34 
   2   6   5   32.16    1.08 
  -8   2   5   31.69    1.25 
   2   6   5   28.13    1.46 
   8  -3  -5   59.20    2.08 
   3   5  -5   59.17    1.95 
  -8   3  -5   61.57    1.92 
   8  -3  -5   59.74    1.86 
   5  -8  -5   59.59    1.93 
  -5   8  -5   57.25    1.98 
  -3  -5  -5   61.10    1.91 
   3   5  -5   58.12    1.85 
  -5   8  -5   59.64    1.82 
  -8   3  -5   60.46    1.79 
   5  -8  -5   56.13    2.14 
  -5   8   5   61.68    1.82 
   5  -8   5   59.09    2.03 
  -8   3   5   58.52    1.93 
  -3  -5   5   58.75    1.93 
   3   5   5   56.93    2.25 
  -3  -5   5   59.60    1.69 
   8  -3   5   59.46    2.20 
  -4   8  -5    1.74    0.39 
   8  -4  -5    1.22    0.28 
   4  -8  -5    1.35    0.38 
  -4   8  -5    1.19    0.30 
  -4  -4  -5    1.02    0.28 
   4  -8  -5    1.63    0.34 
   8  -4  -5    1.40    0.35 
  -8   4  -5    1.26    0.30 
   4   4  -5    1.10    0.27 
   4   4  -5    1.30    0.30 
   8  -4   5    1.10    0.33 
  -4   8   5    0.91    0.25 
   4   4   5    2.50    0.49 
  -8   4   5    1.65    0.32 
  -4  -4   5    1.45    0.30 
   4  -8   5    1.17    0.28 
   5   3  -5   67.07    2.19 
  -8   5  -5   67.31    2.14 
  -3   8  -5   68.45    2.02 
   8  -5  -5   66.97    2.30 
  -3   8  -5   65.83    2.30 
   3  -8  -5   66.11    2.42 
   5   3  -5   67.35    2.09 
   8  -5  -5   67.58    2.01 
   3  -8  -5   67.61    2.09 
  -5  -3  -5   70.61    2.11 
   8  -5   5   69.60    2.36 
  -5  -3   5   65.36    2.12 
  -8   5   5   67.18    1.85 
  -8   5   5   65.71    2.08 
   3  -8   5   67.26    2.21 
  -3   8   5   69.05    2.01 
   6   2  -5   51.17    1.89 
  -8   6  -5   55.83    1.84 
  -2   8  -5   54.04    1.71 
  -2   8  -5   53.59    1.94 
   6   2  -5   55.83    1.80 
   2  -8  -5   53.51    2.11 
   8  -6  -5   52.48    1.98 
  -6  -2  -5   56.34    1.69 
   2  -8  -5   50.84    1.74 
  -6  -2  -5   55.97    1.79 
   8  -6  -5   56.12    1.70 
   6   2   5   54.41    2.20 
  -6  -2   5   53.03    1.81 
   8  -6   5   56.96    1.62 
  -8   6   5   56.15    1.77 
   2  -8   5   53.42    1.87 
  -8   6   5   55.97    1.61 
   8  -6   5   55.37    2.02 
  -2   8   5   53.85    1.71 
  -7  -1  -5   -0.13    0.16 
  -1   8  -5    0.32    0.24 
  -1   8  -5   -0.04    0.23 
  -8   7  -5    0.35    0.26 
  -7  -1  -5    0.21    0.23 
   7   1  -5   -0.13    0.21 
  -8   7  -5   -0.15    0.17 
   8  -7  -5   -0.09    0.24 
   1  -8  -5    0.06    0.19 
  -8   7   5    0.13    0.19 
  -1   8   5    0.11    0.25 
  -7  -1   5    0.33    0.23 
   8  -7   5   -0.12    0.23 
   1  -8   5   -0.02    0.16 
  -1   8   5   -0.15    0.19 
   7   1   5    0.08    0.31 
  -8   7   5    0.04    0.18 
  -8   8  -5   51.87    1.81 
   0  -8  -5   47.44    1.69 
  -8   8  -5   49.26    1.59 
  -8   0  -5   50.39    1.69 
   0   8  -5   50.84    1.62 
   0   8  -5   52.79    1.82 
   8  -8  -5   49.74    1.98 
   8   0  -5   51.04    1.75 
  -8   0  -5   50.44    1.71 
   8  -8   5   50.36    1.92 
  -8   0   5   49.67    1.77 
   8   0   5   47.09    2.12 
  -8   8   5   50.65    1.62 
   0   8   5   50.78    2.09 
   0  -8   5   50.70    1.82 
   0   8   5   49.87    1.60 
  -9   1  -5   66.24    2.11 
  -1  -8  -5   61.93    2.11 
   1   8  -5   66.04    2.19 
   8  -9  -5   65.04    2.44 
  -8   9  -5   62.91    1.98 
  -8   9  -5   73.00    2.23 
  -9   1  -5   68.01    2.08 
   9  -1  -5   62.21    2.11 
   1   8  -5   63.21    1.94 
  -8   9   5   62.95    1.99 
  -9   1   5   62.45    2.16 
   8  -9   5   61.69    2.33 
   9  -1   5   59.70    2.53 
  -1  -8   5   62.61    2.21 
   1   8   5   62.41    2.53 
   1   8   5   67.45    1.96 
  -2  -7  -5   40.76    1.52 
  -9   2  -5   44.03    1.46 
   7  -9  -5   40.22    1.78 
  -7   9  -5   41.12    1.60 
   9  -2  -5   41.91    1.75 
  -7   9  -5   41.29    1.45 
   9  -2  -5   41.19    1.51 
   2   7  -5   42.94    1.49 
   2   7  -5   42.93    1.60 
  -9   2  -5   41.38    1.52 
  -2  -7   5   39.64    1.36 
   2   7   5   42.49    1.88 
   7  -9   5   41.74    1.69 
  -2  -7   5   40.22    1.52 
  -7   9   5   41.08    1.46 
   9  -2   5   41.13    1.90 
  -9   2   5   41.10    1.58 
   6  -9  -5    0.64    0.36 
   3   6  -5    0.76    0.29 
  -6   9  -5    0.29    0.28 
   9  -3  -5    0.62    0.29 
   3   6  -5    0.76    0.27 
  -9   3  -5    0.33    0.26 
  -6   9  -5    0.50    0.30 
  -3  -6  -5    0.39    0.25 
   9  -3  -5    0.49    0.32 
   9  -3   5    0.15    0.30 
   3   6   5    0.51    0.35 
  -9   3   5    0.32    0.27 
  -6   9   5    0.19    0.24 
   6  -9   5    0.21    0.24 
  -3  -6   5    0.71    0.26 
   4   5  -5   57.55    1.94 
  -5   9  -5   58.43    1.99 
   5  -9  -5   53.77    2.14 
   9  -4  -5   57.37    2.08 
   9  -4  -5   54.42    1.78 
   4   5  -5   55.87    1.83 
  -9   4  -5   53.09    1.86 
  -4  -5  -5   50.43    1.81 
  -5   9  -5   55.91    1.78 
   5  -9   5   53.45    1.97 
   9  -4   5   53.56    2.13 
  -5   9   5   54.53    1.77 
   4   5   5   56.65    2.28 
  -9   4   5   56.30    1.89 
  -4  -5   5   55.16    1.86 
   4  -9  -5   59.15    2.26 
  -9   5  -5   55.72    1.87 
  -4   9  -5   54.26    2.03 
   9  -5  -5   55.31    1.74 
   9  -5  -5   54.78    2.04 
  -4   9  -5   53.70    1.75 
   5   4  -5   58.68    1.86 
  -5  -4  -5   54.82    1.83 
   9  -5   5   53.69    2.09 
   5   4   5   52.43    2.25 
   4  -9   5   43.59    1.86 
  -5  -4   5   53.81    1.84 
  -4   9   5   54.53    1.75 
  -9   5   5   54.59    1.83 
   3  -9  -5    1.02    0.30 
  -9   6  -5    0.98    0.31 
  -3   9  -5    1.03    0.33 
   9  -6  -5    0.62    0.33 
   9  -6  -5    0.75    0.25 
  -6  -3  -5    0.40    0.27 
   6   3  -5    0.24    0.28 
  -3   9  -5    0.90    0.39 
   3  -9  -5    0.49    0.35 
  -3   9   5    0.90    0.30 
   6   3   5    0.26    0.33 
   9  -6   5    0.67    0.34 
   3  -9   5    0.64    0.26 
  -6  -3   5    0.63    0.27 
  -9   6   5    0.72    0.29 
  -9   7  -5   67.13    2.16 
   2  -9  -5   63.51    2.44 
  -7  -2  -5   62.09    2.05 
   7   2  -5   64.87    2.09 
  -2   9  -5   62.41    1.97 
   2  -9  -5   62.80    2.03 
  -2   9  -5   66.33    2.21 
   9  -7  -5   59.58    2.30 
   9  -7   5   58.60    2.29 
   7   2   5   60.99    2.53 
  -9   7   5   64.56    2.05 
  -2   9   5   63.53    1.96 
  -9   7   5   62.44    1.87 
  -7  -2   5   64.39    2.11 
   2  -9   5   63.63    2.18 
  -1   9  -5   59.88    1.95 
   8   1  -5   62.59    2.10 
  -8  -1  -5   66.65    2.05 
  -9   8  -5   62.91    2.16 
   9  -8  -5   59.96    2.36 
  -8  -1  -5   64.04    2.07 
  -9   8  -5   64.53    1.90 
   1  -9  -5   60.14    2.04 
  -1   9   5   61.37    2.47 
  -1   9   5   62.39    1.97 
  -9   8   5   60.39    1.90 
   8   1   5   63.07    2.58 
  -9   8   5   63.67    2.04 
   9  -8   5   65.41    2.37 
  -8  -1   5   67.87    2.16 
   1  -9   5   63.52    2.21 
  -9   0  -5    0.57    0.30 
   9  -9  -5    0.03    0.34 
  -9   9  -5   -0.35    0.22 
  -9   0  -5   -0.19    0.22 
   0   9  -5    0.03    0.26 
   0  -9  -5    0.11    0.24 
  -9   9  -5   -0.22    0.30 
   9   0  -5    0.41    0.31 
   0   9   5    0.22    0.26 
   0  -9   5    0.34    0.27 
   0   9   5    0.29    0.33 
   9  -9   5   -0.08    0.29 
  -9   9   5    0.05    0.25 
   9   0   5    0.03    0.43 
  -9   0   5   -0.06    0.24 
   9 -10  -5   31.58    1.66 
  -9  10  -5   32.12    1.29 
  -9  10  -5   33.28    1.48 
  -1  -9  -5   34.81    1.39 
  10  -1  -5   33.88    1.42 
 -10   1  -5   32.03    1.37 
 -10   1  -5   32.21    1.34 
  10  -1   5   31.43    1.81 
  -1  -9   5   33.87    1.50 
  -9  10   5   33.88    1.32 
   9 -10   5   31.41    1.56 
   1   9   5   32.15    1.73 
 -10   1   5   34.59    1.48 
   8 -10  -5    0.47    0.42 
 -10   2  -5   -0.06    0.26 
  -2  -8  -5    0.10    0.27 
  -8  10  -5    0.30    0.31 
  -8  10  -5    0.52    0.33 
  10  -2  -5   -0.07    0.30 
 -10   2   5    0.44    0.31 
   8 -10   5    0.29    0.31 
  -2  -8   5   -0.09    0.22 
   2   8   5   -0.07    0.33 
  10  -2   5    0.87    0.46 
  -8  10   5   -0.18    0.26 
   7 -10  -5   57.89    2.33 
  -3  -7  -5   57.46    2.00 
 -10   3  -5   61.54    2.04 
  -7  10  -5   60.22    1.92 
  -7  10  -5   61.74    2.13 
   3   7  -5   60.08    1.97 
  10  -3  -5   56.92    1.95 
  10  -3   5   56.27    2.40 
   7 -10   5   54.83    2.15 
 -10   3   5   58.29    2.06 
  -7  10   5   57.84    1.91 
   3   7   5   54.20    2.38 
  -3  -7   5   56.80    1.97 
  10  -4  -5   58.01    2.19 
   6 -10  -5   54.51    2.26 
 -10   4  -5   56.33    1.95 
  -4  -6  -5   54.02    1.91 
  -6  10  -5   56.32    1.86 
  10  -4  -5   55.24    1.86 
  -6  10  -5   57.04    2.09 
   4   6  -5   55.19    1.89 
 -10   4   5   52.13    1.94 
  -4  -6   5   56.11    1.91 
  -6  10   5   55.70    1.85 
   6 -10   5   55.62    2.07 
  10  -4   5   55.91    2.29 
   4   6   5   54.47    2.35 
  -5  10  -5   -0.25    0.29 
   5   5  -5    0.43    0.30 
   5 -10  -5    0.02    0.32 
  -5  -5  -5   -0.08    0.22 
  10  -5  -5   -0.21    0.23 
  10  -5  -5   -0.01    0.34 
  -5  10  -5   -0.08    0.27 
 -10   5  -5   -0.02    0.25 
  -5  -5   5   -0.22    0.19 
  10  -5   5   -0.21    0.24 
   5 -10   5   -0.08    0.21 
  -5  10   5   -0.02    0.26 
   5   5   5    0.10    0.32 
 -10   5   5   -0.19    0.26 
   4 -10  -5   40.33    1.88 
  -4  10  -5   36.51    1.64 
 -10   6  -5   35.95    1.50 
   6   4  -5   37.89    1.49 
  -6  -4  -5   37.69    1.47 
  -4  10  -5   36.52    1.43 
  10  -6  -5   37.07    1.69 
 -10   6   5   39.01    1.50 
   6   4   5   37.39    1.87 
  -6  -4   5   37.55    1.47 
   4 -10   5   37.61    1.57 
  10  -6   5   39.41    1.74 
  -4  10   5   37.25    1.42 
  -7  -3  -5   45.63    1.65 
  10  -7  -5   40.35    1.84 
 -10   7  -5   42.65    1.68 
   7   3  -5   45.33    1.67 
  -3  10  -5   45.55    1.59 
   3 -10  -5   43.03    1.96 
  -3  10   5   46.24    1.59 
  -7  -3   5   41.81    1.63 
  10  -7   5   39.97    1.84 
 -10   7   5   45.99    1.64 
   3 -10   5   41.46    1.71 
   7   3   5   41.36    2.08 
  10  -8  -5    0.58    0.44 
   2 -10  -5    0.36    0.37 
  -2  10  -5    0.55    0.31 
 -10   8  -5    0.56    0.35 
  -8  -2  -5    0.09    0.30 
   8   2  -5    0.65    0.34 
   2 -10   5    0.57    0.30 
  -2  10   5    0.59    0.31 
   8   2   5    0.73    0.47 
 -10   8   5    0.53    0.30 
  -8  -2   5    0.50    0.30 
  10  -8   5    0.33    0.37 
  -1  10  -5   45.80    1.62 
  -9  -1  -5   46.44    1.67 
  -9  -1  -5   46.77    1.71 
   9   1  -5   47.99    1.77 
  10  -9  -5   47.24    2.05 
   1 -10  -5   42.81    1.65 
   1 -10  -5   44.71    2.06 
 -10   9  -5   47.97    1.81 
  -1  10   5   42.32    1.59 
   1 -10   5   38.31    1.78 
  10  -9   5   45.59    1.97 
  -9  -1   5   45.13    1.76 
   9   1   5   45.05    2.19 
 -10   0  -5   21.91    1.08 
   0 -10  -5   20.91    1.07 
  10 -10  -5   19.11    1.32 
 -10  10  -5   19.65    1.01 
 -10   0  -5   20.37    1.07 
 -10  10  -5   22.32    1.21 
   0  10  -5   19.90    1.02 
  10   0  -5   18.80    1.11 
  10   0   5   21.06    1.52 
   0  10   5   20.46    1.37 
 -10  10   5   21.32    1.04 
 -10   0   5   21.48    1.17 
   0  10   5   21.71    1.04 
   0 -10   5   22.11    1.20 
  10 -10   5   21.92    1.30 
  -1 -10  -5    0.46    0.34 
  10 -11  -5   -0.19    0.43 
  11  -1  -5   -0.20    0.34 
 -10  11  -5   -0.17    0.31 
 -11   1  -5   -0.15    0.30 
 -10  11  -5    0.12    0.38 
 -11   1   5   -0.16    0.33 
 -10  11   5   -0.16    0.32 
  10 -11   5    0.26    0.42 
   1  10   5   -0.02    0.37 
  11  -1   5   -0.02    0.51 
   9 -11  -5   34.11    1.78 
  -9  11  -5   31.98    1.53 
 -11   2  -5   33.87    1.46 
  -9  11  -5   36.21    1.40 
  -2  -9  -5   37.14    1.51 
  11  -2  -5   33.01    1.45 
  11  -2   5   32.44    1.89 
   9 -11   5   31.33    1.62 
  -9  11   5   34.59    1.42 
 -11   2   5   31.94    1.50 
  -8  11  -5   40.72    1.72 
   8 -11  -5   40.17    1.93 
  11  -3  -5   40.30    1.58 
  -8  11  -5   38.64    1.52 
  -3  -8  -5   39.12    1.60 
 -11   3  -5   38.85    1.60 
  -8  11   5   39.15    1.54 
  11  -3   5   41.69    2.08 
  -3  -8   5   38.26    1.52 
 -11   3   5   40.57    1.66 
   3   8   5   37.41    1.93 
   8 -11   5   39.53    1.78 
  11  -4  -5    0.53    0.34 
  -7  11  -5   -0.07    0.36 
  -7  11  -5    0.42    0.34 
   4   7  -5    0.01    0.32 
 -11   4  -5    1.17    0.39 
  -4  -7  -5    0.45    0.32 
   7 -11  -5    0.69    0.47 
   4   7   5    0.74    0.48 
  -7  11   5    0.53    0.36 
 -11   4   5    0.52    0.33 
   7 -11   5    0.43    0.37 
  11  -4   5    0.61    0.44 
 -11   5  -5   52.24    1.96 
   5   6  -5   55.61    1.93 
   6 -11  -5   53.67    2.31 
  -6  11  -5   51.87    1.84 
  11  -5  -5   51.11    1.82 
  -5  -6  -5   50.05    1.90 
  -6  11   5   52.27    1.85 
  11  -5   5   53.66    2.30 
 -11   5   5   52.54    1.96 
   5   6   5   53.11    2.37 
  -5  -6   5   55.26    1.92 
   6 -11   5   52.75    2.08 
   6   5  -5   39.91    1.62 
 -11   6  -5   41.89    1.67 
  -5  11  -5   42.08    1.59 
   5 -11  -5   41.21    1.98 
  -6  -5  -5   41.17    1.62 
  11  -6  -5   40.91    1.90 
  11  -6   5   39.80    1.93 
  -5  11   5   44.39    1.60 
 -11   6   5   40.54    1.63 
   5 -11   5   40.68    1.73 
   6   5   5   40.27    2.05 
  -6  -5   5   41.76    1.62 
   4 -11  -5    0.34    0.41 
   7   4  -5    1.23    0.42 
  -4  11  -5    1.74    0.46 
  -7  -4  -5    1.08    0.37 
 -11   7  -5    1.09    0.41 
  11  -7  -5    0.85    0.45 
   7   4   5    0.59    0.51 
  -4  11   5    1.30    0.40 
   4 -11   5    1.62    0.45 
 -11   7   5    0.99    0.38 
  11  -7   5    1.04    0.45 
  -7  -4   5    1.27    0.38 
   8   3  -5   33.06    1.44 
  -8  -3  -5   30.65    1.38 
   3 -11  -5   29.81    1.69 
  -3  11  -5   32.02    1.36 
 -11   8  -5   30.81    1.43 
  11  -8  -5   29.31    1.60 
  -8  -3   5   28.57    1.36 
  -3  11   5   32.19    1.33 
   3 -11   5   31.20    1.48 
 -11   8   5   30.58    1.37 
  11  -8   5   30.01    1.60 
   8   3   5   32.05    1.83 
 -11   9  -5   30.92    1.48 
   9   2  -5   31.18    1.46 
  -2  11  -5   31.57    1.36 
  11  -9  -5   34.92    1.76 
  -9  -2  -5   32.59    1.42 
   2 -11  -5   30.36    1.73 
   2 -11   5   33.73    1.55 
  11  -9   5   31.51    1.66 
  -9  -2   5   33.01    1.47 
  -2  11   5   33.07    1.38 
   9   2   5   32.16    1.85 
   1 -11  -5    0.47    0.40 
 -10  -1  -5   -0.03    0.32 
  11 -10  -5   -0.35    0.45 
  -1  11  -5   -0.22    0.34 
 -11  10  -5   -0.43    0.36 
  10   1  -5    0.08    0.36 
 -10  -1   5   -0.34    0.28 
  11 -10   5    0.25    0.41 
  -1  11   5   -0.36    0.33 
  10   1   5    0.05    0.48 
   1 -11   5   -0.19    0.27 
  11 -11  -5   30.36    1.79 
 -11   0  -5   30.42    1.42 
  11   0  -5   30.54    1.61 
 -10  12  -5   31.62    1.42 
 -10  12  -5   30.93    1.61 
  -2 -10  -5   33.31    1.50 
  12  -2  -5   31.63    1.51 
 -12   2  -5   31.42    1.48 
 -10  12   5   34.10    1.47 
  -3  -9  -5    0.11    0.34 
  -9  12  -5   -0.31    0.33 
   9 -12  -5   -0.02    0.48 
  12  -3  -5    0.19    0.37 
 -12   3  -5   -0.33    0.34 
   3   9   5    0.18    0.44 
 -12   3   5   -0.07    0.32 
  12  -3   5   -0.26    0.48 
  -9  12   5   -0.17    0.34 
   9 -12   5   -0.22    0.37 
   8 -12  -5   21.39    1.49 
  -8  12  -5   22.15    1.15 
 -12   4  -5   21.74    1.20 
  12  -4  -5   21.83    1.15 
  -4  -8  -5   21.70    1.19 
  12  -4   5   20.43    1.53 
  -4  -8   5   21.14    1.11 
   4   8   5   20.89    1.49 
 -12   4   5   20.73    1.23 
   8 -12   5   18.18    1.25 
  -8  12   5   22.17    1.16 
   7 -12  -5   37.31    1.96 
   5   7  -5   36.31    1.57 
  -5  -7  -5   35.90    1.56 
  -7  12  -5   34.83    1.48 
 -12   5  -5   35.48    1.60 
   7 -12   5   35.43    1.68 
 -12   5   5   36.33    1.59 
  -7  12   5   33.63    1.49 
  12  -5   5   34.01    1.92 
   5   7   5   35.05    1.95 
   6   6  -5   -0.14    0.35 
   6 -12  -5    0.85    0.52 
  -6  -6  -5    0.75    0.37 
  -6  12  -5    0.74    0.41 
 -12   6  -5    0.58    0.40 
   6   6   5    0.04    0.46 
   6 -12   5    0.46    0.37 
  12  -6   5    0.58    0.46 
  -6  12   5    0.45    0.38 
 -12   6   5    0.27    0.35 
  -6  -6   5    0.36    0.30 
  -5  12  -5   36.47    1.52 
  -7  -5  -5   34.65    1.53 
  12  -7  -5   33.87    1.86 
   5 -12  -5   36.11    1.90 
 -12   7  -5   37.56    1.62 
   7   5  -5   34.13    1.55 
  -7  -5   5   34.12    1.48 
  12  -7   5   31.22    1.77 
  -5  12   5   33.31    1.48 
   7   5   5   32.52    1.90 
 -12   7   5   31.76    1.51 
   5 -12   5   33.56    1.61 
   8   4  -5   28.82    1.41 
  12  -8  -5   29.65    1.69 
 -12   8  -5   31.87    1.49 
  -4  12  -5   30.11    1.38 
   4 -12  -5   29.38    1.73 
  -8  -4  -5   31.86    1.43 
   8   4   5   28.94    1.80 
  -8  -4   5   28.73    1.36 
   4 -12   5   29.06    1.51 
  -4  12   5   29.39    1.37 
 -12   8   5   27.32    1.38 
   3 -12  -5    0.25    0.47 
  -9  -3  -5    0.20    0.34 
   9   3  -5    0.54    0.40 
  -3  12  -5   -0.38    0.34 
 -12   9  -5    0.32    0.38 
  12  -9  -5    0.25    0.49 
   9   3   5   -0.41    0.41 
  -3  12   5   -0.18    0.38 
  12  -9   5    0.62    0.45 
   3 -12   5   -0.14    0.32 
  -9  -3   5    0.11    0.36 
 -12   9   5   -0.13    0.35 
  -2  12  -5   26.70    1.31 
  12 -10  -5   27.41    1.67 
  -2  12   5   25.06    1.28 
 -10  -2   5   24.98    1.36 
   2 -12   5   26.46    1.44 
  -5  -8   5    0.62    0.42 
   6 -13   5   20.32    1.42 
   5 -13   5    0.07    0.40 
   0   0  -6  245.40    6.18 
   0   0  -6  240.92    6.06 
   0   0   6  240.17    5.83 
  -1   1  -6   12.12    0.56 
   0   1  -6   13.90    0.62 
   0  -1  -6   13.43    0.56 
  -1   0  -6   12.71    0.52 
  -1   0  -6   12.03    0.52 
   1  -1  -6   12.60    0.57 
  -1   1  -6   13.31    0.53 
   1   0  -6   12.10    0.54 
   0   1  -6   13.21    0.53 
   1  -1  -6   12.08    0.52 
   0  -1  -6   13.80    0.54 
   1   0  -6   12.59    0.57 
   1  -1   6   12.94    0.54 
   0  -1   6   12.29    0.53 
   1   0   6   12.94    0.54 
  -1   1   6   12.15    0.44 
  -1   0   6   13.15    0.56 
  -1   1   6   12.71    0.54 
   1  -1   6   12.87    0.48 
   1   0   6   13.35    0.56 
   0   1   6   12.89    0.53 
   0   1   6   12.76    0.53 
  -2   1  -6  149.77    3.77 
  -1  -1  -6  146.92    3.82 
  -1   2  -6  149.76    3.77 
   2  -1  -6  155.36    3.87 
   1   1  -6  146.51    3.98 
   1  -2  -6  152.23    3.78 
   2  -1  -6  145.70    3.87 
   2  -1  -6  147.35    3.86 
   1   1  -6  149.97    3.81 
  -1   2  -6  149.98    3.99 
  -1  -1  -6  148.66    3.79 
  -2   1  -6  148.15    3.86 
   1  -2  -6  149.23    3.89 
  -2   1   6  148.52    3.68 
   1  -2   6  146.97    3.90 
  -1   2   6  149.69    3.66 
  -1  -1   6  149.88    3.70 
   1   1   6  153.30    4.09 
   2  -1   6  147.39    3.69 
  -1   2   6  140.00    4.01 
   2  -1   6  150.84    4.02 
   1   1   6  149.13    3.66 
  -2   2  -6   99.29    2.60 
   2   0  -6   99.27    2.73 
  -2   0  -6  102.30    2.63 
   0  -2  -6  101.45    2.60 
   0   2  -6  102.11    2.61 
   0   2  -6   98.43    2.81 
   2  -2  -6   89.83    2.71 
   2   0  -6  101.97    2.67 
  -2   2  -6   97.56    2.72 
   0  -2  -6   99.17    2.68 
  -2   0  -6   97.59    2.63 
   0   2   6   93.59    2.82 
   2  -2   6   99.23    2.53 
  -2   2   6  103.90    2.62 
   2   0   6  103.81    2.86 
   0   2   6   99.07    2.53 
   0  -2   6  104.69    2.62 
  -2   2   6   99.96    2.54 
   2   0   6  100.13    2.57 
   0  -2   6  100.50    2.54 
  -2   0   6  102.89    2.59 
   2  -2   6  101.80    2.74 
   2  -3  -6   32.47    1.08 
   3  -1  -6   33.76    1.06 
   1   2  -6   31.05    1.14 
   2  -3  -6   30.52    1.09 
  -3   1  -6   31.87    1.01 
  -1  -2  -6   31.77    0.91 
   3  -1  -6   32.66    0.95 
  -2   3  -6   28.86    1.08 
  -2   3  -6   27.79    0.90 
   1   2  -6   30.30    0.98 
  -3   1  -6   31.82    0.97 
  -1  -2  -6   31.38    1.03 
  -2   3   6   30.97    0.97 
  -3   1   6   31.82    1.04 
   3  -1   6   33.09    1.13 
  -1  -2   6   31.98    0.90 
   3  -1   6   32.39    1.02 
  -2   3   6   32.94    0.91 
   1   2   6   34.03    1.20 
  -1  -2   6   31.65    0.98 
   1   2   6   33.08    0.96 
  -3   1   6   31.41    0.99 
   2  -3   6   31.94    0.98 
   2  -3   6   32.57    1.02 
  -1   3  -6   71.03    1.81 
  -3   2  -6   67.09    1.81 
  -1   3  -6   66.07    2.08 
  -2  -1  -6   70.39    1.91 
   2   1  -6   65.82    2.00 
   3  -2  -6   68.49    1.92 
   3  -2  -6   67.07    1.96 
  -3   2  -6   67.67    1.94 
  -2  -1  -6   72.27    1.84 
   1  -3  -6   68.20    1.96 
   2   1  -6   68.24    1.90 
  -2  -1   6   67.30    1.86 
   3  -2   6   64.77    1.80 
  -3   2   6   69.32    1.81 
  -1   3   6   66.99    1.82 
  -1   3   6   66.44    2.06 
   2   1   6   73.23    2.15 
   1  -3   6   68.92    1.83 
  -3   2   6   67.28    1.89 
   2   1   6   66.77    1.80 
   1  -3   6   69.83    1.90 
   3  -2   6   65.40    1.99 
  -3   0  -6  142.89    3.59 
   0   3  -6  136.46    3.50 
   3   0  -6  142.39    3.65 
   3   0  -6  139.18    3.61 
  -3   3  -6  136.42    3.68 
   3  -3  -6  136.63    3.76 
  -3   0  -6  141.97    3.57 
  -3   3  -6  137.62    3.48 
   0  -3  -6  139.07    3.63 
   0   3  -6  133.56    3.80 
   3  -3  -6  130.62    3.66 
   0   3   6  134.52    3.41 
   3   0   6  143.05    3.92 
   3  -3   6  135.88    3.42 
   0  -3   6  138.65    3.44 
   3  -3   6  141.78    3.78 
  -3   3   6  141.04    3.55 
   3   0   6  136.25    3.43 
  -3   3   6  138.48    3.43 
   0   3   6  128.07    3.88 
  -3   0   6  142.97    3.70 
  -3   0   6  138.20    3.47 
   0  -3   6  141.68    3.66 
   1   3  -6   19.16    0.87 
   3  -4  -6   20.13    0.84 
   3  -4  -6   19.56    0.81 
  -3   4  -6   18.62    0.80 
  -1  -3  -6   19.57    0.77 
  -4   1  -6   19.66    0.74 
  -3   4  -6   19.27    0.58 
   4  -1  -6   20.65    0.72 
   4  -1  -6   20.62    0.78 
  -4   1  -6   19.81    0.70 
   1   3  -6   19.33    0.70 
   3  -4   6   19.01    0.71 
   3  -4   6   18.40    0.75 
   4  -1   6   21.50    0.74 
  -4   1   6   19.54    0.78 
   1   3   6   19.10    0.69 
  -3   4   6   20.75    0.73 
   1   3   6   19.15    0.91 
  -1  -3   6   20.16    0.67 
   4  -1   6   19.92    0.88 
  -1  -3   6   20.58    0.72 
  -4   1   6   20.34    0.70 
  -3   4   6   19.71    0.63 
  -2  -2  -6  178.53    4.69 
  -2  -2  -6  192.68    4.60 
   2   2  -6  183.94    4.87 
   4  -2  -6  179.71    4.87 
  -4   2  -6  185.23    4.58 
  -2   4  -6  179.32    4.89 
  -2   4  -6  186.66    4.50 
  -4   2  -6  182.22    4.75 
   2  -4  -6  185.21    5.04 
   2   2  -6  159.88    4.63 
   4  -2  -6  184.32    4.73 
   2   2  -6  184.40    4.78 
   2  -4  -6  185.35    4.79 
   2  -4   6  185.50    4.49 
   4  -2   6  185.45    5.02 
  -4   2   6  182.32    4.44 
   4  -2   6  184.60    4.46 
   2   2   6  185.16    5.13 
   2  -4   6  192.03    4.90 
  -2  -2   6  180.72    4.46 
  -4   2   6  178.46    4.73 
  -2   4   6  185.52    4.48 
   2   2   6  185.51    4.42 
  -4   3  -6   39.39    1.29 
   1  -4  -6   38.40    1.29 
  -1   4  -6   40.10    1.43 
  -4   3  -6   41.14    1.13 
   4  -3  -6   39.30    1.29 
  -3  -1  -6   38.84    1.24 
  -1   4  -6   41.13    1.14 
   4  -3  -6   40.32    1.31 
   3   1  -6   39.80    1.25 
   3   1  -6   42.15    1.20 
  -3  -1  -6   40.91    1.18 
   4  -3   6   40.38    1.35 
  -1   4   6   41.77    1.21 
  -3  -1   6   40.21    1.34 
  -3  -1   6   41.54    1.24 
  -4   3   6   40.66    1.18 
   3   1   6   40.53    1.14 
   1  -4   6   40.08    1.24 
   4  -3   6   39.06    1.17 
  -4   3   6   39.68    1.22 
  -1   4   6   36.23    1.43 
   1  -4   6   41.33    1.21 
   3   1   6   40.46    1.49 
   4  -4  -6   28.30    1.08 
   0  -4  -6   30.70    1.06 
   4  -4  -6   34.40    1.14 
  -4   0  -6   31.10    0.99 
   0   4  -6   29.55    0.94 
   4   0  -6   31.20    1.01 
   0   4  -6   29.10    1.17 
  -4   4  -6   32.67    1.09 
  -4   0  -6   28.67    0.99 
  -4   0   6   29.58    1.07 
   4   0   6   30.78    0.94 
  -4   4   6   30.92    0.96 
   0   4   6   28.13    1.20 
   4   0   6   30.64    1.23 
  -4   0   6   30.82    0.98 
   4  -4   6   31.53    0.98 
   0   4   6   30.33    0.97 
  -4   4   6   30.81    0.98 
   0  -4   6   31.15    0.98 
   0  -4   6   29.36    0.99 
   4  -4   6   29.02    1.08 
  -5   1  -6   80.00    2.28 
   4  -5  -6   78.77    2.48 
   1   4  -6   81.00    2.48 
  -5   1  -6   80.71    2.23 
  -4   5  -6   80.60    2.40 
   1   4  -6   88.54    2.25 
   5  -1  -6   84.79    2.39 
  -1  -4  -6   81.01    2.32 
   4  -5  -6   82.30    2.39 
   5  -1  -6   78.16    2.30 
  -4   5   6   81.05    2.17 
   4  -5   6   84.15    2.44 
  -1  -4   6   81.32    2.32 
   4  -5   6   81.75    2.20 
   5  -1   6   80.59    2.59 
   1   4   6   77.27    2.62 
  -4   5   6   82.39    2.20 
   1   4   6   81.71    2.15 
  -5   1   6   81.13    2.35 
   5  -1   6   81.63    2.14 
  -1  -4   6   81.48    2.17 
  -5   1   6   80.88    2.11 
   2   3  -6   16.19    0.62 
  -2  -3  -6   16.32    0.70 
  -2  -3  -6   16.71    0.53 
   3  -5  -6   15.46    0.78 
   5  -2  -6   17.18    0.70 
  -5   2  -6   16.59    0.61 
   3  -5  -6   15.08    0.75 
   2   3  -6   15.28    0.65 
   5  -2  -6   16.21    0.71 
   2   3  -6   16.18    0.77 
  -3   5  -6   15.61    0.64 
  -5   2  -6   15.37    0.68 
  -3   5  -6   15.83    0.77 
   3  -5   6   16.53    0.70 
  -3   5   6   16.37    0.66 
   5  -2   6   17.24    0.64 
  -5   2   6   16.26    0.60 
   2   3   6   15.52    0.86 
   5  -2   6   17.14    0.82 
  -2  -3   6   15.64    0.62 
  -5   2   6   15.44    0.69 
   2   3   6   16.63    0.61 
   3  -5   6   16.11    0.66 
  -5   3  -6   15.08    0.68 
  -2   5  -6   14.43    0.62 
   5  -3  -6   14.14    0.66 
  -3  -2  -6   15.01    0.54 
   2  -5  -6   15.62    0.71 
  -2   5  -6   16.31    0.82 
  -3  -2  -6   15.53    0.66 
   3   2  -6   14.72    0.65 
  -5   3  -6   14.69    0.54 
   2  -5  -6   15.69    0.80 
  -2   5  -6   15.42    0.50 
   3   2  -6   15.00    0.59 
   5  -3  -6   14.30    0.67 
  -2   5   6   15.57    0.64 
  -5   3   6   16.82    0.60 
  -3  -2   6   16.41    0.62 
   5  -3   6   14.91    0.74 
   3   2   6   15.22    0.55 
   5  -3   6   14.27    0.58 
  -3  -2   6   15.20    0.73 
  -5   3   6   13.97    0.63 
   2  -5   6   15.81    0.65 
   2  -5   6   14.82    0.63 
   3   2   6   13.82    0.81 
  -1   5  -6  147.89    3.68 
   5  -4  -6  144.67    4.06 
   4   1  -6  141.97    3.95 
   1  -5  -6  146.56    3.87 
  -4  -1  -6  144.15    3.82 
  -1   5  -6  141.95    4.08 
  -4  -1  -6  149.93    3.79 
   4   1  -6  138.07    3.82 
  -5   4  -6  149.30    3.94 
   5  -4  -6  149.96    3.89 
   5  -4   6  144.09    3.62 
   1  -5   6  145.91    3.67 
  -5   4   6  145.65    3.82 
  -4  -1   6  148.45    3.66 
  -4  -1   6  145.05    3.95 
  -5   4   6  145.43    3.62 
  -1   5   6  137.47    4.20 
   4   1   6  150.79    4.33 
  -1   5   6  145.68    3.66 
   5  -4   6  148.07    4.11 
   1  -5   6  143.63    3.97 
   4   1   6  145.32    3.53 
   5  -5  -6   24.12    1.02 
   5   0  -6   24.79    0.94 
   5  -5  -6   25.21    0.98 
  -5   5  -6   23.07    0.97 
   0   5  -6   22.94    1.05 
   0  -5  -6   26.14    0.97 
  -5   0  -6   25.63    0.89 
  -5   0  -6   24.70    0.91 
   0   5  -6   23.77    0.83 
   5   0  -6   25.29    0.95 
  -5   0   6   25.41    0.83 
   0   5   6   26.04    0.88 
   0   5   6   23.40    1.11 
  -5   5   6   24.44    0.87 
   0  -5   6   24.27    0.89 
   5   0   6   24.19    0.77 
   0  -5   6   25.26    0.91 
   5   0   6   23.99    1.14 
   5  -5   6   25.07    1.01 
  -5   5   6   24.92    0.85 
   5  -5   6   27.25    0.91 
  -5   0   6   24.87    0.98 
   1   5  -6   46.32    1.41 
   5  -6  -6   45.04    1.52 
  -6   1  -6   44.10    1.40 
  -5   6  -6   43.71    1.38 
  -5   6  -6   46.92    1.57 
  -6   1  -6   44.97    1.45 
   5  -6  -6   46.53    1.66 
   6  -1  -6   45.98    1.55 
  -1  -5  -6   46.11    1.49 
   6  -1  -6   42.98    1.47 
  -1  -5   6   45.83    1.48 
   1   5   6   45.64    1.36 
   6  -1   6   43.39    1.73 
  -1  -5   6   45.49    1.37 
  -6   1   6   47.55    1.27 
   1   5   6   44.10    1.76 
  -5   6   6   45.72    1.34 
  -6   1   6   43.84    1.51 
  -5   6   6   45.13    1.40 
   5  -6   6   42.99    1.56 
   4  -6  -6   42.78    1.47 
   6  -2  -6   41.23    1.42 
   2   4  -6   43.87    1.37 
   6  -2  -6   40.13    1.36 
   4  -6  -6   40.41    1.53 
   2   4  -6   40.35    1.32 
  -4   6  -6   40.22    1.30 
   2   4  -6   43.05    1.50 
  -2  -4  -6   42.81    1.39 
  -6   2  -6   41.41    1.27 
  -4   6  -6   41.88    1.47 
  -6   2  -6   41.11    1.37 
  -6   2   6   38.76    1.38 
  -6   2   6   41.80    1.19 
   4  -6   6   42.63    1.45 
   6  -2   6   42.03    1.26 
  -2  -4   6   42.90    1.27 
   2   4   6   42.70    1.24 
   6  -2   6   43.08    1.60 
   2   4   6   41.68    1.67 
  -4   6   6   41.39    1.31 
  -6   3  -6   77.14    2.08 
   6  -3  -6   77.91    2.24 
   3   3  -6   77.39    2.26 
  -3  -3  -6   77.17    2.24 
  -3   6  -6   77.44    2.14 
  -6   3  -6   76.22    2.26 
  -3   6  -6   75.44    2.41 
   3  -6  -6   80.61    2.32 
  -3  -3  -6   78.65    2.06 
   3  -6  -6   75.55    2.49 
   3   3  -6   78.30    2.20 
   6  -3  -6   74.70    2.34 
  -6   3   6   76.92    2.25 
  -6   3   6   76.72    2.03 
   6  -3   6   75.27    2.05 
   3   3   6   78.47    2.62 
   6  -3   6   76.01    2.46 
   3  -6   6   76.97    2.33 
  -3   6   6   79.34    2.15 
  -3  -3   6   77.36    2.34 
   3   3   6   80.36    2.02 
  -3  -3   6   75.58    2.06 
  -2   6  -6   35.19    1.18 
  -2   6  -6   34.86    1.41 
  -6   4  -6   36.19    1.27 
   6  -4  -6   35.67    1.32 
   4   2  -6   37.54    1.23 
  -4  -2  -6   35.30    1.22 
  -4  -2  -6   36.77    1.11 
   6  -4  -6   36.44    1.23 
   2  -6  -6   36.71    1.27 
   2  -6  -6   36.63    1.47 
   4   2  -6   34.64    1.22 
   4   2   6   36.66    1.53 
   4   2   6   36.74    1.04 
  -4  -2   6   34.67    1.29 
  -2   6   6   36.18    1.18 
   6  -4   6   36.47    1.12 
   2  -6   6   37.29    1.26 
  -6   4   6   35.27    1.11 
  -6   4   6   34.33    1.20 
   6  -4   6   35.57    1.37 
  -4  -2   6   36.86    1.15 
  -1   6  -6   25.82    0.95 
  -1   6  -6   26.99    1.18 
  -5  -1  -6   25.75    0.98 
   6  -5  -6   26.77    1.01 
   6  -5  -6   27.92    1.13 
   5   1  -6   25.80    1.01 
   1  -6  -6   27.16    1.03 
  -5  -1  -6   26.49    0.93 
  -1   6  -6   25.44    0.86 
   5   1  -6   26.48    1.02 
  -6   5  -6   27.66    1.07 
  -1   6   6   25.10    1.20 
  -5  -1   6   27.36    0.92 
  -6   5   6   28.24    0.95 
  -1   6   6   26.04    0.95 
   1  -6   6   26.99    1.01 
  -6   5   6   29.00    0.98 
   6  -5   6   27.89    0.93 
  -5  -1   6   26.09    1.07 
   5   1   6   28.05    1.30 
   6  -5   6   26.91    1.12 
   0   6  -6  135.29    3.97 
  -6   6  -6  142.26    3.90 
  -6   0  -6  142.23    3.76 
   0   6  -6  122.98    3.61 
   6   0  -6  139.70    3.98 
   0  -6  -6  141.48    3.80 
  -6   0  -6  144.93    3.75 
   6   0  -6  138.94    3.78 
   6  -6  -6  143.13    3.79 
   6  -6  -6  140.20    4.09 
   6  -6   6  142.43    4.06 
  -6   6   6  139.11    3.70 
   6   0   6  143.02    4.29 
   0   6   6  132.58    4.23 
  -6   6   6  144.46    3.59 
   6  -6   6  140.42    3.57 
   0   6   6  142.11    3.57 
   0  -6   6  140.64    3.91 
  -6   0   6  137.15    3.86 
   0  -6   6  138.61    3.58 
   7  -1  -6   22.65    0.97 
   1   6  -6   22.68    0.90 
  -1  -6  -6   22.88    0.97 
   1   6  -6   23.80    1.08 
  -7   1  -6   23.60    0.96 
  -7   1  -6   24.48    0.93 
  -6   7  -6   23.70    0.92 
  -6   7  -6   23.73    1.05 
   6  -7  -6   24.39    1.14 
   6  -7  -6   23.20    0.99 
  -1  -6   6   20.02    0.88 
  -7   1   6   22.96    1.01 
   1   6   6   22.61    1.20 
   6  -7   6   23.81    1.07 
  -1  -6   6   23.50    0.97 
   1   6   6   24.73    0.89 
  -6   7   6   24.21    0.94 
   7  -1   6   22.80    1.22 
   2   5  -6   89.84    2.51 
   2   5  -6   91.47    2.71 
   7  -2  -6   92.75    2.74 
   5  -7  -6   85.79    2.84 
  -7   2  -6   90.07    2.46 
   5  -7  -6   85.87    2.62 
  -5   7  -6   89.80    2.69 
  -7   2  -6   86.24    2.57 
   2   5  -6   88.60    2.62 
   7  -2  -6   89.09    2.56 
  -2  -5  -6   91.08    2.59 
  -5   7  -6   87.24    2.44 
   2   5   6   83.46    2.96 
  -5   7   6   87.59    2.45 
   2   5   6   88.95    2.35 
   7  -2   6   87.66    2.92 
  -7   2   6   87.00    2.61 
  -2  -5   6   88.14    2.38 
   3   4  -6   17.42    0.79 
  -4   7  -6   18.45    0.94 
  -7   3  -6   17.85    0.70 
  -4   7  -6   18.36    0.80 
   7  -3  -6   19.17    0.90 
   3   4  -6   18.72    0.80 
   7  -3  -6   18.72    0.81 
  -7   3  -6   18.12    0.83 
  -3  -4  -6   18.20    0.83 
   4  -7  -6   17.81    0.88 
   4  -7  -6   18.26    0.97 
   4  -7   6   17.58    0.85 
  -4   7   6   18.92    0.80 
  -3  -4   6   18.41    0.72 
  -7   3   6   19.36    0.86 
  -7   3   6   18.87    0.67 
   3   4   6   18.29    0.68 
   3   4   6   18.17    1.06 
  -3  -4   6   18.46    0.89 
   7  -3   6   18.76    0.98 
   7  -4  -6   34.03    1.18 
  -4  -3  -6   32.34    1.19 
   4   3  -6   31.95    1.19 
  -3   7  -6   32.35    1.37 
   4   3  -6   31.75    1.17 
   7  -4  -6   32.26    1.28 
   3  -7  -6   32.06    1.23 
   3  -7  -6   31.61    1.40 
  -3   7  -6   32.69    1.15 
  -7   4  -6   30.26    1.19 
   7  -4   6   33.66    1.05 
  -3   7   6   30.88    1.13 
  -7   4   6   31.78    1.02 
  -4  -3   6   30.61    1.04 
  -4  -3   6   31.06    1.23 
  -7   4   6   32.35    1.19 
   7  -4   6   39.02    1.42 
   4   3   6   31.87    1.48 
   3  -7   6   34.01    1.25 
   7  -5  -6   66.72    2.22 
  -5  -2  -6   67.87    2.04 
   2  -7  -6   65.46    2.37 
   7  -5  -6   64.57    2.01 
   2  -7  -6   68.12    2.07 
   5   2  -6   68.22    2.06 
  -7   5  -6   65.46    2.09 
  -5  -2  -6   67.58    1.93 
  -2   7  -6   67.81    1.97 
  -2   7  -6   68.45    2.28 
   7  -5   6   64.37    2.24 
   5   2   6   70.81    2.49 
   2  -7   6   66.74    2.12 
   7  -5   6   65.82    1.87 
  -7   5   6   64.68    2.01 
  -5  -2   6   65.23    2.12 
  -2   7   6   68.14    1.96 
  -7   5   6   69.49    1.88 
   7  -6  -6   10.66    0.72 
  -6  -1  -6   10.83    0.56 
  -1   7  -6   10.34    0.74 
  -1   7  -6    9.58    0.59 
   1  -7  -6   10.93    0.64 
   6   1  -6    7.75    0.61 
   7  -6  -6   10.36    0.61 
  -7   6  -6   10.62    0.68 
  -6  -1  -6   11.41    0.63 
   6   1   6   11.35    0.87 
   7  -6   6    9.85    0.69 
  -1   7   6   10.40    0.59 
  -6  -1   6   10.35    0.66 
  -1   7   6    8.54    0.73 
   1  -7   6    9.97    0.60 
  -7   6   6   10.08    0.56 
   7  -6   6   10.17    0.57 
  -7   6   6    9.36    0.56 
   7   0  -6   16.21    0.81 
  -7   0  -6   15.92    0.75 
   7  -7  -6   15.63    0.92 
   0  -7  -6   16.79    0.82 
  -7   7  -6   15.36    0.85 
   0   7  -6   15.50    0.74 
  -7   0  -6   15.34    0.76 
   7  -7  -6   15.69    0.79 
   0   7  -6   15.90    0.91 
  -7   7  -6   16.66    0.74 
   7   0   6   17.95    1.09 
   0  -7   6   14.52    0.76 
   0   7   6   16.25    1.05 
  -7   0   6   15.25    0.82 
  -7   7   6   15.63    0.75 
   0   7   6   15.23    0.73 
   7  -7   6   15.03    0.87 
  -7   7   6   16.37    0.72 
  -1  -7  -6   67.36    2.12 
  -7   8  -6   64.71    2.00 
   7  -8  -6   65.74    2.40 
  -7   8  -6   67.12    2.22 
   1   7  -6   66.87    2.03 
  -8   1  -6   69.52    2.08 
   1   7  -6   69.91    2.26 
   8  -1  -6   66.55    2.13 
  -8   1  -6   65.27    2.10 
  -1  -7   6   68.86    1.99 
   1   7   6   65.15    2.52 
   1   7   6   68.45    1.97 
  -7   8   6   68.92    2.03 
  -8   1   6   63.31    2.17 
   7  -8   6   69.48    2.35 
  -1  -7   6   67.65    2.20 
   8  -1   6   66.20    2.54 
   2   6  -6   16.31    0.79 
  -8   2  -6   17.05    0.77 
  -2  -6  -6   15.68    0.83 
  -8   2  -6   16.71    0.82 
   2   6  -6   17.35    0.93 
  -6   8  -6   16.29    0.91 
   6  -8  -6   16.20    0.84 
   8  -2  -6   16.76    0.83 
   6  -8  -6   15.41    0.98 
  -6   8  -6   17.72    0.82 
  -6   8   6   16.18    0.81 
   2   6   6   16.52    0.71 
   2   6   6   16.17    1.07 
   8  -2   6   18.11    1.09 
  -8   2   6   16.65    0.88 
   6  -8   6   15.81    0.89 
  -2  -6   6   17.20    0.74 
  -5   8  -6   13.74    0.72 
  -5   8  -6   13.47    0.83 
   8  -3  -6   13.85    0.74 
  -3  -5  -6   12.37    0.72 
   3   5  -6   12.99    0.70 
  -8   3  -6   12.56    0.72 
   5  -8  -6   13.68    0.79 
   5  -8  -6   12.71    0.88 
   8  -3  -6   12.92    0.80 
   5  -8   6   14.26    0.78 
   3   5   6   13.08    0.94 
  -8   3   6   12.91    0.76 
  -3  -5   6   13.40    0.62 
  -5   8   6   13.51    0.72 
   8  -3   6   11.51    0.85 
  -3  -5   6   13.42    0.77 
  -4   8  -6  123.05    3.70 
   8  -4  -6  124.22    3.42 
   8  -4  -6  126.13    3.73 
   4   4  -6  123.32    3.45 
  -4  -4  -6  120.81    3.47 
   4  -8  -6  127.99    3.56 
  -8   4  -6  123.51    3.52 
   4  -8  -6  125.06    3.94 
  -4   8  -6  122.36    3.31 
   4   4   6  119.23    3.98 
  -4   8   6  127.28    3.34 
   8  -4   6  122.21    3.84 
  -8   4   6  120.39    3.50 
   4  -8   6  124.32    3.67 
  -4  -4   6  128.31    3.58 
   8  -5  -6   30.55    1.17 
  -3   8  -6   31.88    1.18 
   5   3  -6   30.09    1.20 
   3  -8  -6   30.32    1.46 
  -5  -3  -6   33.46    1.23 
   3  -8  -6   31.96    1.25 
   8  -5  -6   30.69    1.32 
  -3   8  -6   33.61    1.44 
  -8   5  -6   30.17    1.24 
  -8   5   6   32.03    1.05 
  -5  -3   6   30.47    1.26 
  -8   5   6   31.50    1.21 
  -3   8   6   31.42    1.17 
   3  -8   6   30.23    1.25 
   8  -5   6   32.29    1.41 
   5   3   6   32.70    1.59 
  -2   8  -6   17.07    0.99 
   8  -6  -6   17.44    0.81 
  -2   8  -6   17.95    0.84 
   6   2  -6   17.23    0.87 
  -6  -2  -6   19.07    0.79 
   2  -8  -6   15.98    1.05 
   8  -6  -6   16.73    0.95 
  -6  -2  -6   16.56    0.83 
   2  -8  -6   17.66    0.86 
  -8   6  -6   16.54    0.88 
  -6  -2   6   15.41    0.85 
  -2   8   6   16.83    0.80 
  -8   6   6   17.23    0.74 
   8  -6   6   16.05    0.72 
  -8   6   6   16.54    0.82 
   6   2   6   15.68    1.08 
   8  -6   6   16.73    0.96 
   2  -8   6   17.88    0.87 
   8  -7  -6   47.76    1.89 
  -8   7  -6   48.69    1.75 
  -7  -1  -6   49.97    1.61 
  -7  -1  -6   50.92    1.68 
   7   1  -6   49.30    1.70 
   1  -8  -6   49.06    1.68 
   8  -7  -6   49.88    1.63 
  -1   8  -6   50.13    1.60 
  -1   8  -6   48.52    1.82 
  -8   7   6   46.62    1.60 
   8  -7   6   47.16    1.86 
  -1   8   6   48.37    1.58 
  -8   7   6   49.14    1.54 
  -7  -1   6   45.74    1.72 
   7   1   6   49.92    2.09 
   1  -8   6   48.87    1.73 
  -1   8   6   48.13    2.01 
   8  -7   6   49.80    1.54 
   0   8  -6   23.08    1.14 
   8   0  -6   23.94    1.11 
   0   8  -6   25.19    1.03 
  -8   8  -6   25.85    1.19 
  -8   0  -6   26.17    1.06 
   0  -8  -6   24.77    1.10 
  -8   8  -6   25.01    1.00 
   8  -8  -6   25.04    1.29 
  -8   0  -6   25.04    1.08 
   0  -8   6   25.99    1.14 
   8   0   6   26.21    1.44 
   0   8   6   21.83    1.30 
  -8   8   6   24.79    1.02 
  -8   0   6   25.62    1.16 
   8  -8   6   24.76    1.23 
  -1  -8  -6   16.98    0.92 
   1   8  -6   17.84    0.99 
   9  -1  -6   16.95    0.94 
  -9   1  -6   16.07    0.88 
   8  -9  -6   15.66    1.09 
  -9   1  -6   18.43    0.91 
  -8   9  -6   18.90    1.03 
  -8   9  -6   15.40    0.85 
   8  -9   6   16.73    1.03 
   1   8   6   17.56    0.83 
   1   8   6   15.53    1.13 
  -8   9   6   18.44    0.91 
  -1  -8   6   17.25    0.84 
   9  -1   6   17.02    1.19 
  -9   1   6   17.56    0.96 
   9  -2  -6   18.64    0.97 
   2   7  -6   18.92    0.99 
  -7   9  -6   18.96    0.92 
  -9   2  -6   19.23    0.95 
   7  -9  -6   19.56    1.17 
   2   7  -6   18.77    0.90 
  -7   9  -6   20.16    1.05 
  -2  -7  -6   18.54    0.96 
  -9   2  -6   17.26    0.86 
  -7   9   6   18.74    0.94 
  -2  -7   6   20.53    0.86 
   7  -9   6   20.30    1.08 
  -9   2   6   18.59    1.00 
   9  -2   6   18.24    1.21 
   6  -9  -6   50.88    2.04 
  -6   9  -6   50.30    1.67 
  -9   3  -6   49.89    1.76 
  -3  -6  -6   50.40    1.76 
   3   6  -6   50.02    1.70 
   9  -3  -6   50.59    1.73 
  -6   9  -6   49.40    1.86 
   3   6   6   48.24    2.10 
  -3  -6   6   51.46    1.81 
  -9   3   6   49.82    1.80 
  -6   9   6   50.52    1.69 
   9  -3   6   51.42    2.10 
   6  -9   6   52.08    1.90 
  -5   9  -6   10.54    0.84 
   9  -4  -6   11.35    0.69 
  -4  -5  -6   10.96    0.71 
   9  -4  -6   12.37    0.85 
  -5   9  -6   11.97    0.73 
   4   5  -6    6.93    0.64 
  -9   4  -6   10.71    0.71 
   5  -9  -6    9.96    0.86 
   4   5   6   10.85    0.91 
  -9   4   6   11.68    0.75 
   9  -4   6   11.25    0.87 
  -4  -5   6   11.09    0.73 
  -5   9   6   12.13    0.72 
   5  -9   6   10.68    0.74 
   4  -9  -6    9.81    0.89 
   9  -5  -6   10.48    0.78 
   9  -5  -6    8.59    0.60 
   4  -9  -6    9.01    0.68 
  -4   9  -6    9.12    0.67 
   5   4  -6    9.30    0.68 
  -4   9  -6    8.93    0.83 
  -9   5  -6    9.55    0.69 
  -5  -4  -6    9.37    0.66 
   4  -9   6    8.64    0.66 
  -5  -4   6    9.14    0.69 
  -4   9   6    8.32    0.62 
  -9   5   6    9.06    0.67 
   5   4   6    9.07    0.87 
   9  -5   6    9.33    0.79 
   9  -6  -6   65.13    2.04 
  -6  -3  -6   67.17    2.14 
   3  -9  -6   65.47    2.14 
  -3   9  -6   68.14    2.07 
   6   3  -6   67.22    2.15 
   9  -6  -6   67.04    2.38 
   3  -9  -6   65.25    2.52 
  -9   6  -6   64.12    2.18 
  -3   9  -6   68.31    2.38 
   3  -9   6   65.50    2.23 
  -3   9   6   67.43    2.08 
  -6  -3   6   64.59    2.19 
  -9   6   6   68.13    2.14 
   9  -6   6   67.10    2.42 
   6   3   6   59.76    2.57 
  -9   7  -6   12.06    0.81 
  -2   9  -6   11.66    0.86 
   7   2  -6   11.37    0.78 
  -7  -2  -6   12.33    0.75 
   9  -7  -6   11.42    0.87 
  -2   9  -6   10.99    0.74 
   2  -9  -6   11.43    0.96 
   2  -9  -6    8.38    0.70 
   7   2   6   12.17    1.00 
   9  -7   6   12.79    0.90 
   2  -9   6   11.71    0.75 
  -9   7   6   11.86    0.72 
  -7  -2   6   10.83    0.76 
  -2   9   6   12.35    0.74 
  -9   7   6   12.29    0.67 
  -9   8  -6   13.36    0.89 
   9  -8  -6   12.17    0.93 
  -8  -1  -6   12.58    0.80 
  -1   9  -6   11.78    0.76 
   1  -9  -6   11.28    0.76 
   8   1  -6   12.82    0.83 
  -8  -1  -6   11.76    0.71 
  -1   9  -6   13.36    0.90 
  -1   9   6   12.76    1.02 
  -8  -1   6   13.87    0.86 
   1  -9   6   13.20    0.81 
  -1   9   6   11.99    0.74 
   9  -8   6   12.86    0.91 
   9  -8   6   13.34    0.72 
   8   1   6   12.60    1.05 
  -9   8   6   12.33    0.71 
  -9   0  -6   55.94    1.88 
   0  -9  -6   56.12    1.93 
   9  -9  -6   55.04    2.23 
   9   0  -6   54.49    1.95 
   0   9  -6   52.79    1.78 
  -9   9  -6   51.71    1.75 
  -9   0  -6   57.20    1.92 
  -9   9  -6   54.63    2.02 
   0   9   6   55.91    1.80 
  -9   0   6   52.82    1.98 
   9   0   6   52.54    2.37 
   0   9   6   54.15    2.33 
   9  -9   6   56.03    2.17 
  -9   9   6   54.88    1.79 
  -1  -9  -6    7.54    0.69 
  10  -1  -6    6.87    0.73 
  -9  10  -6    6.68    0.76 
 -10   1  -6    7.93    0.70 
   9 -10  -6    7.51    0.92 
 -10   1  -6    8.57    0.69 
  -9  10  -6    7.06    0.66 
  -9  10   6    6.29    0.63 
   1   9   6    7.44    0.88 
   9 -10   6    6.83    0.77 
  -1  -9   6    8.41    0.65 
 -10   1   6    7.68    0.74 
  10  -1   6    6.29    0.94 
  -8  10  -6   65.12    2.10 
  10  -2  -6   67.88    2.23 
 -10   2  -6   64.57    2.20 
   8 -10  -6   67.86    2.61 
  -8  10  -6   66.70    2.34 
  -2  -8  -6   68.27    2.26 
   2   8   6   58.44    2.59 
 -10   2   6   63.19    2.27 
  -2  -8   6   66.67    2.25 
   8 -10   6   70.70    2.48 
  -8  10   6   67.62    2.13 
  10  -2   6   59.76    2.62 
  -7  10  -6   16.69    1.03 
 -10   3  -6   17.54    0.96 
  -7  10  -6   16.20    0.90 
  -3  -7  -6   15.45    0.92 
  10  -3  -6   16.30    0.92 
   3   7  -6   15.49    0.89 
   7 -10  -6   14.40    1.10 
 -10   3   6   16.55    0.99 
   3   7   6   14.39    1.15 
  -3  -7   6   17.83    0.96 
  10  -3   6   16.59    1.19 
  -7  10   6   17.40    0.92 
   7 -10   6   16.45    1.00 
  -6  10  -6   20.09    1.00 
   6 -10  -6   18.09    1.21 
  -6  10  -6   21.69    1.14 
 -10   4  -6   19.57    1.02 
  -4  -6  -6   18.28    0.99 
  10  -4  -6   17.10    0.93 
   4   6  -6   17.68    0.96 
  -6  10   6   19.24    0.98 
  10  -4   6   19.03    1.24 
 -10   4   6   19.26    1.04 
   6 -10   6   17.40    1.02 
   4   6   6   18.07    1.26 
  -4  -6   6   20.27    1.01 
  -5  -5  -6   50.34    1.83 
 -10   5  -6   52.75    1.89 
  10  -5  -6   50.93    1.75 
  -5  10  -6   51.31    1.77 
  -5  10  -6   53.04    2.08 
   5   5  -6   51.92    1.83 
   5 -10  -6   50.79    2.18 
   5 -10   6   52.85    1.96 
  -5  10   6   52.01    1.77 
 -10   5   6   51.33    1.85 
  -5  -5   6   51.98    1.87 
  10  -5   6   51.63    2.15 
   5   5   6   47.72    2.22 
  -6  -4  -6   24.54    1.12 
   4 -10  -6   23.75    1.43 
 -10   6  -6   22.52    1.12 
  -4  10  -6   22.59    1.07 
  -4  10  -6   24.54    1.31 
  10  -6  -6   23.81    1.02 
  10  -6  -6   22.56    1.24 
   6   4   6   21.45    1.39 
   4 -10   6   21.52    1.12 
  10  -6   6   20.26    1.26 
  -6  -4   6   21.76    1.09 
  -4  10   6   21.14    1.04 
 -10   6   6   21.49    1.09 
  -3  10  -6   22.83    1.08 
  10  -7  -6   21.83    1.27 
   3 -10  -6   20.78    1.34 
 -10   7  -6   21.34    1.13 
  -7  -3  -6   23.36    1.12 
   7   3  -6   21.51    1.12 
  -7  -3   6   22.07    1.11 
   7   3   6   23.44    1.49 
 -10   7   6   21.84    1.07 
  10  -7   6   22.44    1.27 
  -3  10   6   22.97    1.05 
   3 -10   6   20.34    1.11 
   2 -10  -6   79.13    2.47 
  -2  10  -6   73.74    2.33 
   2 -10  -6   74.77    2.92 
  -8  -2  -6   74.14    2.43 
 -10   8  -6   74.20    2.53 
  10  -8  -6   70.86    2.72 
   8   2  -6   77.46    2.48 
   2 -10   6   75.87    2.57 
 -10   8   6   74.49    2.41 
  -8  -2   6   73.94    2.50 
   8   2   6   75.83    3.03 
  10  -8   6   74.08    2.74 
  -2  10   6   75.09    2.33 
   9   1  -6   11.68    0.88 
   1 -10  -6   10.80    0.79 
  -1  10  -6   10.47    0.80 
   1 -10  -6   11.51    1.07 
 -10   9  -6   10.16    0.87 
  -9  -1  -6   12.28    0.84 
  10  -9  -6   10.39    0.98 
  -1  10   6   11.64    0.79 
   9   1   6   12.14    1.13 
  10  -9   6   10.23    0.93 
  -9  -1   6   10.32    0.82 
 -10   0  -6   12.42    0.82 
 -10   0  -6   10.58    0.80 
   0 -10  -6   10.66    0.82 
 -10  10  -6    9.33    0.85 
  10 -10  -6    8.92    0.98 
 -10  10  -6   10.29    0.74 
   0  10  -6   10.22    0.75 
  10   0  -6    8.99    0.83 
 -10  10   6   10.56    0.77 
  10   0   6    9.85    1.11 
  10 -10   6   11.86    0.99 
   0 -10   6    9.99    0.73 
   0  10   6   10.37    0.78 
   0  10   6    9.19    1.01 
 -10   0   6    9.13    0.85 
 -10  11  -6   33.14    1.61 
  -1 -10  -6   36.29    1.55 
  10 -11  -6   32.16    1.82 
 -11   1  -6   35.33    1.50 
  11  -1  -6   34.43    1.55 
 -10  11  -6   34.31    1.40 
 -11   1   6   33.88    1.58 
  11  -1   6   33.82    1.96 
 -10  11   6   35.65    1.45 
  10 -11   6   32.70    1.70 
   1  10   6   32.80    1.87 
  -2  -9  -6   17.21    0.98 
   9 -11  -6   14.88    1.22 
  -9  11  -6   16.95    1.12 
 -11   2  -6   17.30    1.02 
  -9  11  -6   14.04    0.92 
  11  -2  -6   16.32    1.02 
  11  -2   6   16.04    1.30 
   2   9   6   14.07    1.27 
 -11   2   6   14.13    1.01 
  -9  11   6   16.62    0.99 
   9 -11   6   14.64    1.09 
 -11   3  -6    7.48    0.74 
  -3  -8  -6    7.11    0.71 
  -8  11  -6    6.46    0.71 
  11  -3  -6    8.43    0.77 
  -8  11  -6    8.93    0.87 
   8 -11  -6    6.93    0.92 
  -8  11   6    7.96    0.72 
 -11   3   6    6.75    0.76 
  11  -3   6    7.31    1.02 
   8 -11   6    8.81    0.83 
   3   8   6    6.75    0.91 
  -7  11  -6   43.70    1.88 
  -7  11  -6   47.26    1.71 
  -4  -7  -6   46.63    1.78 
   7 -11  -6   43.95    2.10 
  11  -4  -6   46.29    1.72 
 -11   4  -6   45.83    1.79 
   4   7  -6   45.22    1.73 
  -4  -7   6   46.97    1.76 
  -7  11   6   47.20    1.71 
  11  -4   6   48.60    2.26 
 -11   4   6   42.33    1.78 
   7 -11   6   45.33    1.90 
   4   7   6   48.56    2.24 
  -5  -6  -6   10.72    0.80 
   5   6  -6    8.67    0.78 
 -11   5  -6    8.66    0.78 
  -6  11  -6   10.30    0.98 
  -6  11  -6    9.58    0.80 
  11  -5  -6   10.62    0.75 
   6 -11  -6   10.43    1.02 
  11  -5   6    8.93    0.93 
  -5  -6   6   10.25    0.79 
 -11   5   6   11.46    0.86 
   5   6   6    9.66    1.01 
   6 -11   6   11.15    0.86 
  -6  11   6   10.59    0.79 
  -5  11  -6   14.69    0.94 
   5 -11  -6   15.18    1.20 
  -6  -5  -6   16.14    0.95 
   6   5  -6   14.49    0.94 
 -11   6  -6   15.88    0.97 
 -11   6   6   14.19    0.94 
   5 -11   6   15.04    0.98 
  -5  11   6   15.12    0.92 
  -6  -5   6   14.73    0.93 
  11  -6   6   12.87    1.06 
   6   5   6   14.20    1.20 
   4 -11  -6   37.82    1.95 
  -7  -4  -6   39.94    1.60 
 -11   7  -6   38.82    1.65 
   7   4  -6   41.38    1.64 
  -4  11  -6   40.70    1.58 
 -11   7   6   37.67    1.60 
   7   4   6   36.56    1.99 
   4 -11   6   43.36    1.75 
  -4  11   6   40.09    1.55 
  11  -7   6   37.84    1.86 
  -7  -4   6   39.64    1.62 
   3 -11  -6    5.97    0.89 
  -8  -3  -6    8.01    0.75 
  -3  11  -6    7.76    0.76 
   8   3  -6    6.61    0.77 
 -11   8  -6    8.60    0.82 
  11  -8  -6    7.55    0.92 
   3 -11   6    7.77    0.76 
  -8  -3   6    8.88    0.78 
  -3  11   6    7.96    0.73 
 -11   8   6    7.93    0.75 
  11  -8   6    7.39    0.84 
   8   3   6    7.61    1.03 
  -9  -2  -6    9.03    0.81 
   2 -11  -6    7.03    0.96 
  11  -9  -6    9.43    0.98 
 -11   9  -6    9.48    0.88 
   9   2  -6   10.45    0.89 
  -2  11  -6    9.02    0.80 
  11  -9   6   10.10    0.97 
  -2  11   6    8.32    0.78 
   9   2   6    8.78    1.06 
  -9  -2   6   10.28    0.84 
  11 -10  -6   31.99    1.76 
 -10  -1  -6   32.76    1.46 
  10   1  -6   32.85    1.55 
  -1  11  -6   33.63    1.39 
 -11  10  -6   32.27    1.57 
   1 -11  -6   28.21    1.73 
  -1  11   6   33.06    1.41 
 -10  -1   6   33.07    1.55 
  11 -10   6   32.49    1.69 
  10   1   6   35.46    1.97 
 -11  11  -6   11.35    1.00 
 -11   0  -6   11.20    0.87 
  11 -11  -6   10.84    1.14 
 -12   2  -6   11.31    0.93 
 -10  12  -6   12.96    1.06 
  -2 -10  -6   11.49    1.00 
 -10  12  -6   12.96    0.94 
 -10  12   6   11.18    0.98 
  12  -3  -6   40.75    1.68 
  -9  12  -6   39.44    1.63 
 -12   3  -6   40.53    1.71 
   9 -12  -6   39.40    2.06 
  -3  -9  -6   38.70    1.71 
  -9  12  -6   39.05    1.84 
  -9  12   6   41.53    1.65 
   9 -12   6   37.52    1.84 
  -8  12  -6   10.11    0.88 
  12  -4  -6    9.65    0.84 
 -12   4  -6   10.29    0.90 
  -4  -8  -6    9.08    0.85 
   8 -12  -6    8.31    1.07 
  -4  -8   6    9.32    0.78 
 -12   4   6    7.57    0.84 
   8 -12   6    9.68    0.92 
  12  -4   6   11.64    1.17 
  -8  12   6    8.93    0.82 
  -7  12  -6    9.37    0.85 
  -5  -7  -6   12.01    0.90 
 -12   5  -6   10.70    0.91 
   7 -12  -6   10.43    1.10 
   5   7  -6   11.11    0.90 
  -7  12   6   10.82    0.87 
  12  -5   6   12.98    1.18 
   7 -12   6   13.54    1.00 
   5   7   6   11.24    1.15 
 -12   5   6   11.57    0.95 
 -12   6  -6   44.93    1.91 
   6   6  -6   48.07    1.87 
  -6  12  -6   45.38    1.77 
  -6  -6  -6   48.64    1.88 
   6 -12  -6   44.64    2.23 
 -12   6   6   47.56    1.89 
  12  -6   6   47.18    2.22 
   6 -12   6   45.62    1.96 
  -6  12   6   47.73    1.80 
  -6  -6   6   46.53    1.83 
   6   6   6   42.78    2.25 
 -12   7  -6    8.42    0.83 
  -5  12  -6    7.74    0.82 
   5 -12  -6    7.69    0.99 
   7   5  -6    7.71    0.84 
  -7  -5  -6    7.60    0.76 
  -5  12   6    8.05    0.79 
 -12   7   6    8.00    0.79 
  -7  -5   6    6.94    0.75 
  12  -7   6    6.50    0.91 
   7   5   6    8.43    1.12 
   5 -12   6    7.94    0.81 
   8   4  -6   10.91    0.93 
  -4  12  -6   11.14    0.91 
   4 -12  -6    9.22    1.06 
  -8  -4  -6   10.98    0.88 
 -12   8  -6   11.18    0.96 
   4 -12   6   12.24    0.97 
  12  -8   6   11.53    1.10 
   8   4   6   11.97    1.23 
  -4  12   6   10.99    0.87 
 -12   8   6   11.41    0.92 
  -8  -4   6   10.30    0.88 
  -9  -3  -6   35.50    1.59 
  -3  12  -6   35.24    1.54 
  -3  12   6   35.84    1.54 
  -9  -3   6   35.56    1.60 
  12 -10  -6   15.03    1.28 
  -2  12   6   15.97    1.07 
   0   0  -7    0.25    0.15 
   0   0  -7    0.62    0.19 
   0   0   7   -0.02    0.12 
   0   0   7    0.08    0.08 
  -1   0  -7   98.23    2.66 
  -1   1  -7   98.82    2.62 
   1  -1  -7   97.05    2.69 
   0   1  -7   99.27    2.63 
   1   0  -7   95.50    2.72 
  -1   0  -7   95.00    2.63 
  -1   1  -7   97.21    2.72 
   1  -1  -7   91.76    2.65 
   1   0  -7   95.40    2.65 
   0  -1  -7  102.67    2.65 
   0  -1  -7   96.53    2.66 
  -1   1   7   94.89    2.61 
   0   1   7   98.38    2.71 
   0   1   7   94.68    2.56 
   1   0   7   98.79    2.57 
   1   0   7   96.83    2.72 
   1  -1   7  111.24    2.69 
   1  -1   7   95.84    2.56 
  -1   1   7  100.70    2.58 
  -1   0   7   96.21    2.57 
   0  -1   7   98.85    2.57 
  -1   2  -7   10.73    0.60 
   2  -1  -7    9.47    0.52 
   1   1  -7    9.92    0.57 
   2  -1  -7   11.14    0.52 
   1  -2  -7   10.37    0.45 
   1  -2  -7   11.36    0.57 
  -2   1  -7   10.32    0.48 
   1   1  -7   10.50    0.51 
  -2   1  -7    9.88    0.49 
  -1   2  -7   10.84    0.48 
  -1  -1  -7   10.73    0.51 
  -1  -1  -7   10.67    0.46 
   2  -1  -7   11.03    0.37 
   1  -2   7   10.90    0.50 
  -1  -1   7   10.26    0.52 
   1   1   7   10.87    0.51 
  -2   1   7   10.03    0.52 
   1  -2   7   11.31    0.41 
  -1   2   7    9.97    0.49 
  -1   2   7   11.31    0.51 
   2  -1   7   11.15    0.54 
   2  -1   7    9.71    0.49 
   1   1   7   10.98    0.55 
   0   2  -7  115.18    3.30 
   0  -2  -7  117.37    3.17 
   2  -2  -7  114.57    3.20 
  -2   0  -7  118.60    3.12 
   2  -2  -7  117.37    3.19 
   2   0  -7  115.79    3.15 
  -2   0  -7  115.13    3.09 
  -2   2  -7  114.04    3.21 
  -2   2  -7  121.09    3.08 
   2   0  -7  119.80    3.24 
   0  -2  -7  121.26    3.08 
   0   2  -7  118.05    3.08 
   2  -2   7  119.83    3.01 
   2  -2   7  118.31    3.22 
  -2   2   7  121.13    3.11 
   0   2   7  127.59    3.02 
  -2   2   7  117.90    3.03 
   0   2   7  112.35    3.30 
   0  -2   7  120.58    3.08 
   2   0   7  118.63    3.03 
   0  -2   7  119.10    3.01 
   2   0   7  119.32    3.34 
  -2   0   7  117.79    3.05 
   3  -1  -7  107.43    3.01 
   2  -3  -7  110.80    3.06 
  -2   3  -7  110.67    2.86 
   1   2  -7  103.93    3.13 
   1   2  -7  110.35    2.93 
   2  -3  -7  110.24    3.11 
  -3   1  -7  113.39    2.99 
  -1  -2  -7  110.10    2.98 
  -3   1  -7  112.33    2.91 
  -1  -2  -7  106.78    2.86 
   3  -1  -7  111.88    2.93 
  -1  -2   7  106.51    2.84 
   3  -1   7  112.15    2.88 
   1   2   7  114.01    3.24 
   1   2   7  112.36    2.83 
  -2   3   7  112.27    2.86 
   3  -1   7  119.58    3.20 
  -3   1   7  108.76    3.02 
  -2   3   7  110.81    2.84 
   2  -3   7  113.48    2.85 
   2  -3   7  112.42    3.03 
  -3   1   7  110.43    2.86 
  -3   2  -7  130.16    3.38 
   3  -2  -7  128.15    3.52 
  -3   2  -7  129.85    3.52 
   2   1  -7  127.72    3.45 
  -2  -1  -7  135.81    3.40 
  -1   3  -7  128.42    3.67 
   3  -2  -7  132.98    3.51 
   1  -3  -7  129.44    3.52 
  -2  -1  -7  134.27    3.46 
   2   1  -7  128.62    3.61 
  -1   3  -7  133.55    3.36 
  -2  -1   7  130.12    3.35 
   1  -3   7  134.11    3.50 
   1  -3   7  132.11    3.32 
   2   1   7  133.94    3.30 
  -1   3   7  129.11    3.68 
   3  -2   7  132.03    3.63 
   3  -2   7  129.57    3.31 
   2   1   7  137.45    3.77 
  -3   2   7  131.87    3.31 
  -1   3   7  132.76    3.31 
  -3   2   7  127.20    3.45 
   3  -3  -7    2.29    0.32 
  -3   0  -7    2.32    0.26 
   0  -3  -7    2.42    0.32 
   3   0  -7    2.15    0.16 
  -3   3  -7    1.87    0.27 
   0   3  -7    2.75    0.24 
   3  -3  -7    2.47    0.26 
  -3   3  -7    2.33    0.23 
   3   0  -7    1.61    0.26 
   0   3  -7    1.99    0.35 
  -3   0  -7    2.24    0.24 
   0  -3   7    2.86    0.19 
   0  -3   7    2.09    0.26 
   3   0   7    1.94    0.26 
  -3   0   7    2.43    0.30 
   0   3   7    2.27    0.26 
   0   3   7    2.37    0.33 
  -3   0   7    2.43    0.31 
   3  -3   7    2.03    0.24 
  -3   3   7    2.51    0.27 
  -3   3   7    2.23    0.23 
   3   0   7    3.06    0.35 
   3  -3   7    2.46    0.27 
   3  -4  -7   73.65    2.20 
   3  -4  -7   72.48    2.22 
   4  -1  -7   75.16    2.06 
  -1  -3  -7   72.81    2.12 
  -3   4  -7   72.35    2.20 
   4  -1  -7   73.98    2.14 
   1   3  -7   69.30    2.26 
  -4   1  -7   72.93    2.08 
  -3   4  -7   73.54    1.91 
  -4   1  -7   75.74    2.04 
  -3   4   7   74.46    2.00 
  -1  -3   7   72.74    2.01 
   3  -4   7   71.55    2.00 
   4  -1   7   75.85    2.32 
   1   3   7   71.06    1.96 
  -4   1   7   72.30    1.99 
  -1  -3   7   74.42    2.02 
  -4   1   7   73.86    2.14 
  -3   4   7   73.88    1.97 
   4  -1   7   75.53    2.02 
   3  -4   7   75.54    2.16 
   1   3   7   71.88    2.35 
  -2   4  -7    0.06    0.09 
  -4   2  -7   -0.01    0.11 
   2   2  -7    0.01    0.07 
   2  -4  -7    0.05    0.16 
  -2  -2  -7    0.05    0.09 
  -4   2  -7   -0.05    0.12 
   2  -4  -7    0.04    0.13 
  -2   4  -7   -0.03    0.19 
  -2  -2  -7   -0.09    0.12 
   4  -2  -7   -0.03    0.10 
   4  -2  -7    0.41    0.19 
   2   2  -7    0.05    0.18 
   2   2  -7    0.21    0.15 
   2  -4   7    0.00    0.09 
   2   2   7   -0.03    0.09 
   2   2   7    0.12    0.18 
   2  -4   7    0.11    0.13 
  -4   2   7   -0.16    0.11 
   4  -2   7    0.26    0.14 
  -2  -2   7   -0.13    0.12 
   4  -2   7    0.11    0.15 
  -2   4   7    0.08    0.13 
  -4   2   7    0.23    0.16 
  -1   4  -7   91.37    2.71 
  -3  -1  -7   92.54    2.41 
  -1   4  -7   90.14    2.33 
  -4   3  -7   92.00    2.55 
  -3  -1  -7   86.98    2.44 
  -4   3  -7   88.71    2.35 
   4  -3  -7   86.02    2.52 
   4  -3  -7   85.02    2.53 
   3   1  -7   91.41    2.40 
   3   1  -7   87.85    2.48 
   1  -4  -7   91.11    2.54 
  -1   4   7   86.08    2.35 
  -4   3   7   87.68    2.34 
   1  -4   7   92.17    2.38 
  -3  -1   7   88.39    2.40 
  -4   3   7   86.93    2.44 
  -3  -1   7   90.32    2.60 
   3   1   7   92.15    2.33 
   4  -3   7   90.70    2.62 
   3   1   7   89.71    2.77 
   1  -4   7   89.85    2.48 
   4  -3   7   86.64    2.36 
  -1   4   7   91.15    2.76 
   0   4  -7   49.46    1.41 
  -4   4  -7   46.89    1.33 
  -4   4  -7   49.42    1.58 
   4   0  -7   46.53    1.43 
  -4   0  -7   48.77    1.45 
  -4   0  -7   48.08    1.46 
   4  -4  -7   48.10    1.59 
   4  -4  -7   49.63    1.58 
   0  -4  -7   49.41    1.55 
   4   0  -7   47.66    1.52 
   0   4  -7   48.21    1.69 
   4  -4   7   50.57    1.59 
   0   4   7   49.70    1.43 
   4   0   7   47.39    1.72 
   0  -4   7   48.80    1.45 
   4   0   7   48.72    1.41 
   0  -4   7   48.04    1.44 
   0   4   7   45.70    1.70 
  -4   0   7   47.06    1.44 
  -4   4   7   51.68    1.43 
  -4   0   7   48.42    1.57 
   4  -4   7   51.16    1.45 
  -4   4   7   47.43    1.42 
   5  -1  -7    1.08    0.24 
  -1  -4  -7    0.98    0.22 
  -5   1  -7    0.77    0.19 
  -4   5  -7    1.14    0.27 
   4  -5  -7    1.28    0.28 
   1   4  -7    1.39    0.33 
   5  -1  -7    1.48    0.23 
  -5   1  -7    1.30    0.23 
   4  -5  -7    1.27    0.26 
   1   4  -7    0.88    0.20 
  -4   5   7    1.15    0.23 
   1   4   7    1.01    0.20 
   4  -5   7    0.92    0.21 
   4  -5   7    0.89    0.20 
   5  -1   7    1.14    0.21 
  -5   1   7    0.65    0.22 
   5  -1   7    0.74    0.26 
  -5   1   7    0.96    0.21 
  -4   5   7    1.31    0.18 
  -1  -4   7    1.36    0.24 
  -1  -4   7    1.20    0.19 
   1   4   7    0.67    0.27 
   5  -2  -7   71.54    2.06 
   3  -5  -7   69.27    2.22 
  -5   2  -7   69.26    2.05 
  -5   2  -7   74.76    1.95 
   2   3  -7   69.14    2.20 
   2   3  -7   71.85    1.97 
   3  -5  -7   70.75    2.14 
  -3   5  -7   67.79    2.18 
   5  -2  -7   71.71    2.08 
   2   3  -7   67.03    1.98 
  -2  -3  -7   67.21    2.04 
  -5   2   7   67.96    2.05 
   2   3   7   70.44    2.34 
   2   3   7   67.60    1.89 
  -3   5   7   66.97    1.94 
  -5   2   7   70.24    1.89 
  -2  -3   7   69.80    1.92 
   3  -5   7   70.41    1.95 
   5  -2   7   68.90    2.24 
   5  -2   7   67.63    1.92 
   3  -5   7   71.56    2.10 
   3   2  -7   94.72    2.81 
   5  -3  -7   95.37    2.76 
   2  -5  -7   94.47    2.95 
  -3  -2  -7   93.22    2.67 
   3   2  -7   96.75    2.67 
  -3  -2  -7   99.38    2.56 
  -2   5  -7   98.29    2.47 
   2  -5  -7   95.39    2.76 
  -2   5  -7   96.68    2.93 
  -5   3  -7   98.12    2.54 
   5  -3  -7   98.93    2.74 
  -5   3  -7   95.06    2.72 
   2  -5   7   97.07    2.57 
   3   2   7   95.68    2.47 
   5  -3   7   96.85    2.53 
   3   2   7   98.29    3.05 
   5  -3   7   95.13    2.89 
  -3  -2   7   98.89    2.58 
  -5   3   7   95.87    2.68 
   2  -5   7   97.63    2.75 
  -5   3   7   96.28    2.51 
  -2   5   7   94.61    2.56 
  -1   5  -7    6.61    0.34 
  -4  -1  -7    5.43    0.41 
   5  -4  -7    6.16    0.44 
  -4  -1  -7    6.16    0.36 
   4   1  -7    5.98    0.45 
   5  -4  -7    5.48    0.45 
   1  -5  -7    5.35    0.43 
  -1   5  -7    5.93    0.56 
  -5   4  -7    5.61    0.46 
   5  -4   7    5.50    0.38 
  -4  -1   7    5.89    0.41 
   4   1   7    5.55    0.33 
   5  -4   7    6.75    0.47 
  -5   4   7    5.95    0.39 
   1  -5   7    5.80    0.36 
  -1   5   7    4.76    0.38 
  -5   4   7    5.62    0.39 
   1  -5   7    4.97    0.39 
  -1   5   7    6.06    0.52 
  -4  -1   7    5.66    0.47 
   4   1   7    5.22    0.53 
   5   0  -7   92.11    2.61 
  -5   5  -7   89.32    2.66 
   5  -5  -7   87.80    2.64 
   0  -5  -7   91.60    2.61 
  -5   0  -7   91.17    2.52 
   0   5  -7   90.84    2.45 
   0   5  -7   88.39    2.77 
   5  -5  -7   90.36    2.75 
  -5   0  -7   91.42    2.53 
   0  -5   7   91.28    2.45 
  -5   0   7   93.02    2.42 
  -5   0   7   87.09    2.66 
   5  -5   7   89.87    2.43 
   0   5   7   85.85    2.88 
   5   0   7   91.10    2.35 
  -5   5   7   92.10    2.48 
   5   0   7   94.58    2.95 
   0  -5   7   91.41    2.58 
   0   5   7   90.31    2.42 
   5  -5   7   93.34    2.75 
  -5   5   7   90.34    2.44 
   1   5  -7   78.40    2.55 
   1   5  -7   82.35    2.28 
   6  -1  -7   72.55    2.36 
  -6   1  -7   80.34    2.28 
  -5   6  -7   82.98    2.49 
  -6   1  -7   78.75    2.33 
  -1  -5  -7   83.10    2.40 
   5  -6  -7   80.92    2.58 
   5  -6  -7   81.86    2.45 
   5  -6   7   80.93    2.51 
   1   5   7   84.07    2.76 
   5  -6   7   71.89    2.23 
  -5   6   7   82.40    2.27 
   1   5   7   82.93    2.21 
  -1  -5   7   82.96    2.23 
   6  -1   7   82.38    2.70 
  -6   1   7   77.51    2.42 
  -1  -5   7   81.96    2.36 
  -6   1   7   86.43    2.15 
  -6   2  -7   49.12    1.49 
   6  -2  -7   49.54    1.62 
  -2  -4  -7   49.93    1.61 
  -6   2  -7   48.32    1.59 
  -4   6  -7   49.10    1.72 
   2   4  -7   48.71    1.74 
   6  -2  -7   50.57    1.62 
   4  -6  -7   49.59    1.77 
   4  -6  -7   49.99    1.69 
  -4   6   7   48.29    1.52 
   4  -6   7   50.50    1.53 
   6  -2   7   50.19    1.82 
  -6   2   7   50.33    1.42 
  -6   2   7   49.83    1.64 
   2   4   7   48.72    1.44 
   6  -2   7   52.14    1.50 
  -2  -4   7   48.55    1.48 
   4  -6   7   52.56    1.68 
   2   4   7   50.66    1.90 
  -6   3  -7    1.86    0.23 
   3   3  -7    1.89    0.30 
  -3  -3  -7    2.15    0.31 
   3  -6  -7    1.67    0.32 
   6  -3  -7    2.15    0.31 
   6  -3  -7    2.16    0.32 
   3  -6  -7    2.33    0.38 
   3   3  -7    1.71    0.33 
  -6   3  -7    1.82    0.30 
  -3   6  -7    2.21    0.40 
   3  -6   7    1.83    0.29 
   6  -3   7    2.51    0.29 
  -6   3   7    2.03    0.25 
   3   3   7    1.43    0.35 
   3  -6   7    1.92    0.28 
   3   3   7    2.02    0.24 
  -3   6   7    1.67    0.27 
   6  -3   7    1.97    0.36 
  -3  -3   7    1.93    0.27 
  -6   3   7    1.62    0.29 
   4   2  -7   71.82    2.13 
  -6   4  -7   70.59    2.18 
  -2   6  -7   72.53    2.37 
  -4  -2  -7   71.67    2.00 
   6  -4  -7   73.01    2.18 
   2  -6  -7   73.69    2.45 
   6  -4  -7   73.08    2.25 
  -4  -2  -7   68.99    2.12 
   2  -6  -7   70.02    2.18 
  -2   6   7   73.11    2.05 
  -6   4   7   72.84    1.98 
   4   2   7   73.19    1.90 
  -4  -2   7   75.60    2.05 
  -4  -2   7   72.79    2.25 
   6  -4   7   74.68    2.35 
   6  -4   7   70.37    1.98 
   4   2   7   70.81    2.50 
  -6   4   7   70.12    2.11 
   2  -6   7   72.67    2.19 
   2  -6   7   70.06    2.04 
  -6   5  -7   79.39    2.40 
   5   1  -7   81.39    2.34 
  -5  -1  -7   81.15    2.24 
   6  -5  -7   80.03    2.48 
  -1   6  -7   81.65    2.57 
   1  -6  -7   80.26    2.36 
  -5  -1  -7   77.03    2.28 
   6  -5  -7   80.40    2.37 
   6  -5   7   80.53    2.51 
   6  -5   7   82.17    2.18 
   1  -6   7   82.25    2.37 
  -6   5   7   81.04    2.19 
  -5  -1   7   77.11    2.16 
   1  -6   7   65.90    2.18 
  -5  -1   7   79.65    2.42 
  -6   5   7   80.93    2.27 
  -1   6   7   74.92    2.62 
   5   1   7   78.01    2.70 
   0  -6  -7    0.12    0.19 
  -6   0  -7    0.11    0.19 
   0   6  -7    0.21    0.24 
   6   0  -7    0.09    0.19 
  -6   6  -7    0.36    0.23 
   0   6  -7    0.32    0.16 
   6  -6  -7    0.00    0.21 
  -6   0  -7    0.20    0.17 
   6  -6  -7    0.13    0.19 
  -6   6   7    0.27    0.20 
   6  -6   7    0.12    0.16 
   0   6   7    0.18    0.17 
  -6   6   7    0.30    0.16 
   0   6   7    0.49    0.26 
   0  -6   7    0.16    0.16 
   6   0   7    0.18    0.25 
   6  -6   7    0.23    0.21 
  -6   0   7    0.00    0.20 
   0  -6   7   -0.02    0.14 
  -7   1  -7   85.69    2.47 
   6  -7  -7   83.09    2.54 
  -1  -6  -7   82.87    2.51 
   1   6  -7   81.99    2.37 
   7  -1  -7   82.80    2.49 
   6  -7  -7   82.25    2.73 
  -7   1  -7   84.86    2.41 
  -6   7  -7   82.37    2.59 
   1   6  -7   84.28    2.67 
  -1  -6   7   84.11    2.34 
   1   6   7   82.63    2.30 
  -7   1   7   83.19    2.56 
  -6   7   7   81.81    2.35 
   7  -1   7   86.50    2.89 
   6  -7   7   83.96    2.36 
   1   6   7   80.67    2.86 
   6  -7   7   83.09    2.65 
  -7   2  -7    0.56    0.21 
  -7   2  -7    0.46    0.21 
   5  -7  -7    0.69    0.31 
  -5   7  -7    0.63    0.29 
  -5   7  -7    0.77    0.24 
   2   5  -7    1.01    0.32 
  -2  -5  -7    0.26    0.22 
   2   5  -7    0.72    0.24 
   7  -2  -7    1.06    0.29 
   5  -7  -7    0.75    0.28 
   5  -7   7    0.88    0.26 
   2   5   7    0.60    0.19 
   2   5   7    1.14    0.37 
   5  -7   7    0.89    0.26 
  -2  -5   7    0.84    0.22 
  -7   2   7    0.79    0.27 
  -5   7   7    0.39    0.21 
   7  -2   7    0.66    0.31 
   7  -3  -7   85.36    2.57 
  -4   7  -7  101.98    2.80 
   3   4  -7   85.59    2.52 
   4  -7  -7   83.95    2.84 
  -3  -4  -7   85.09    2.58 
   4  -7  -7   92.66    2.69 
   7  -3  -7   90.79    2.79 
  -4   7  -7   85.72    2.44 
  -7   3  -7   85.56    2.59 
  -3  -4   7   93.60    2.74 
  -4   7   7   86.53    2.45 
  -3  -4   7   89.13    2.38 
  -7   3   7   85.74    2.60 
   4  -7   7   84.14    2.67 
   7  -3   7   89.04    2.88 
   3   4   7   90.81    2.34 
  -7   3   7   87.19    2.31 
   3   4   7   87.33    2.99 
   4  -7   7   87.13    2.46 
   7  -4  -7   76.40    2.30 
   3  -7  -7   77.45    2.39 
  -3   7  -7   76.69    2.20 
   4   3  -7   76.64    2.29 
   7  -4  -7   79.54    2.44 
   3  -7  -7   75.47    2.61 
  -7   4  -7   74.86    2.34 
  -3   7  -7   80.31    2.59 
  -4  -3  -7   77.18    2.31 
  -7   4   7   77.76    2.09 
   3  -7   7   79.53    2.40 
   3  -7   7   76.48    2.21 
  -3   7   7   76.28    2.21 
   7  -4   7   79.69    2.12 
  -7   4   7   75.59    2.30 
   4   3   7   72.85    2.67 
  -4  -3   7   75.03    2.41 
   7  -4   7   78.54    2.56 
  -4  -3   7   77.77    2.15 
   5   2  -7    1.63    0.33 
   7  -5  -7    2.66    0.39 
   7  -5  -7    1.90    0.35 
  -2   7  -7    1.90    0.41 
   2  -7  -7    1.76    0.34 
  -5  -2  -7    1.99    0.27 
  -5  -2  -7    1.84    0.33 
  -2   7  -7    1.16    0.28 
  -7   5  -7    1.79    0.34 
   2  -7  -7    2.83    0.49 
   2  -7   7    1.60    0.29 
  -7   5   7    1.57    0.27 
   2  -7   7    1.59    0.30 
  -7   5   7    2.19    0.33 
   7  -5   7    1.83    0.36 
  -2   7   7    1.40    0.29 
   5   2   7    2.05    0.45 
  -5  -2   7    1.54    0.34 
   7  -5   7    1.77    0.27 
   7  -6  -7   34.86    1.30 
   1  -7  -7   34.72    1.32 
   6   1  -7   36.72    1.33 
  -6  -1  -7   35.13    1.28 
  -6  -1  -7   35.05    1.21 
   7  -6  -7   34.92    1.42 
  -1   7  -7   34.74    1.46 
  -7   6  -7   35.41    1.37 
  -7   6   7   35.17    1.23 
   1  -7   7   34.37    1.23 
  -1   7   7   31.37    1.51 
   1  -7   7   35.68    1.30 
   7  -6   7   36.90    1.45 
   6   1   7   36.61    1.63 
  -1   7   7   34.10    1.21 
  -7   6   7   35.77    1.20 
   7  -6   7   34.40    1.19 
  -6  -1   7   34.71    1.36 
  -7   7  -7   49.13    1.77 
  -7   0  -7   50.87    1.68 
  -7   0  -7   51.23    1.65 
   7  -7  -7   50.06    1.70 
   0   7  -7   48.80    1.87 
   7  -7  -7   50.81    1.90 
   0  -7  -7   51.62    1.74 
   7   0  -7   51.43    1.73 
   0  -7   7   51.14    1.62 
   7   0   7   47.85    2.05 
   0   7   7   50.40    2.07 
   7  -7   7   47.41    1.83 
  -7   7   7   50.09    1.61 
   7  -7   7   52.34    1.62 
  -7   0   7   51.21    1.78 
   0   7   7   50.37    1.59 
   0  -7   7   52.98    1.73 
   7  -8  -7    0.68    0.30 
  -7   8  -7    0.34    0.31 
   8  -1  -7    0.28    0.26 
  -1  -7  -7    0.54    0.28 
   1   7  -7    0.51    0.31 
  -8   1  -7    1.22    0.29 
  -8   1  -7    0.79    0.28 
   7  -8  -7    1.00    0.36 
   8  -1   7    0.69    0.36 
   7  -8   7    0.84    0.32 
  -7   8   7    1.02    0.30 
  -8   1   7    0.78    0.31 
   7  -8   7    0.81    0.28 
  -1  -7   7    0.61    0.23 
   1   7   7    0.67    0.24 
   1   7   7    0.90    0.37 
  -8   2  -7   27.25    1.16 
  -2  -6  -7   28.79    1.20 
  -8   2  -7   29.01    1.09 
  -6   8  -7   28.64    1.12 
   2   6  -7   29.16    1.12 
   8  -2  -7   29.10    1.20 
   6  -8  -7   28.95    1.39 
   6  -8  -7   30.74    1.25 
  -6   8  -7   27.87    1.28 
   2   6  -7   33.00    1.35 
   2   6   7   31.90    1.07 
  -6   8   7   30.04    1.15 
  -8   2   7   28.88    1.23 
  -2  -6   7   31.19    1.10 
   8  -2   7   29.10    1.45 
   2   6   7   27.83    1.47 
   6  -8   7   30.01    1.29 
  -8   3  -7   38.82    1.44 
  -5   8  -7   39.20    1.37 
   3   5  -7   39.00    1.38 
   5  -8  -7   39.50    1.51 
   5  -8  -7   39.27    1.66 
  -5   8  -7   39.59    1.58 
  -3  -5  -7   38.90    1.44 
   8  -3  -7   38.35    1.42 
   5  -8   7   37.35    1.48 
  -3  -5   7   41.10    1.30 
   8  -3   7   38.55    1.68 
  -5   8   7   40.86    1.39 
  -8   3   7   38.01    1.45 
  -3  -5   7   38.83    1.52 
   3   5   7   38.87    1.75 
  -4   8  -7    0.35    0.24 
   4  -8  -7   -0.01    0.23 
  -4   8  -7    0.18    0.32 
  -8   4  -7    0.14    0.23 
  -4  -4  -7    0.35    0.23 
   4  -8  -7   -0.12    0.26 
   4   4  -7    0.47    0.26 
   8  -4  -7    0.25    0.22 
  -8   4   7    0.22    0.23 
  -4   8   7   -0.03    0.21 
   4   4   7   -0.09    0.26 
   4  -8   7   -0.24    0.15 
   8  -4   7    0.19    0.25 
  -4  -4   7   -0.08    0.22 
   3  -8  -7   52.16    1.80 
   5   3  -7   52.14    1.75 
   8  -5  -7   52.68    1.89 
  -8   5  -7   51.83    1.80 
  -5  -3  -7   52.27    1.76 
  -3   8  -7   52.98    1.99 
   8  -5  -7   51.92    1.72 
  -3   8  -7   53.04    1.69 
   3  -8  -7   50.18    2.05 
  -8   5   7   52.10    1.75 
  -5  -3   7   52.47    1.84 
  -8   5   7   50.91    1.55 
   8  -5   7   59.48    2.02 
   3  -8   7   51.04    1.80 
   5   3   7   52.12    2.15 
  -3   8   7   49.91    1.66 
  -6  -2  -7   30.15    1.20 
   2  -8  -7   29.28    1.47 
   8  -6  -7   30.48    1.33 
  -2   8  -7   28.50    1.13 
  -2   8  -7   31.37    1.41 
  -8   6  -7   28.87    1.24 
   6   2  -7   29.31    1.21 
   8  -6  -7   29.40    1.17 
   2  -8  -7   27.29    1.18 
   2  -8   7   30.27    1.22 
  -8   6   7   30.61    1.08 
  -6  -2   7   29.06    1.26 
   8  -6   7   28.49    1.33 
   6   2   7   30.17    1.53 
  -2   8   7   31.24    1.16 
   8  -6   7   29.93    1.08 
  -8   6   7   31.49    1.17 
   1  -8  -7    0.08    0.23 
  -1   8  -7    0.26    0.31 
  -7  -1  -7   -0.19    0.22 
  -7  -1  -7    0.08    0.19 
  -8   7  -7   -0.05    0.27 
   8  -7  -7    0.10    0.27 
   8  -7  -7   -0.33    0.20 
   7   1  -7    0.27    0.26 
   8  -7   7   -0.15    0.18 
   1  -8   7   -0.01    0.17 
  -8   7   7    0.14    0.19 
   7   1   7    0.03    0.29 
  -1   8   7    0.09    0.22 
   8  -7   7    0.32    0.28 
  -8   7   7    0.57    0.24 
   1  -8   7   -0.09    0.20 
  -1   8   7    0.03    0.26 
  -7  -1   7    0.04    0.25 
   0   8  -7   45.18    1.71 
   8  -8  -7   39.13    1.76 
   8   0  -7   42.02    1.61 
  -8   8  -7   47.19    1.70 
   0  -8  -7   44.24    1.62 
  -8   0  -7   42.26    1.54 
  -8   0  -7   44.83    1.54 
   0   8   7   41.15    1.91 
   8   0   7   42.56    1.96 
   8  -8   7   45.96    1.53 
   0  -8   7   42.53    1.51 
  -8   0   7   41.86    1.65 
   0   8   7   45.61    1.50 
  -8   8   7   43.66    1.49 
   8  -9  -7   53.58    2.20 
   1   8  -7   55.04    2.04 
  -1  -8  -7   56.69    1.95 
  -9   1  -7   56.84    1.86 
   9  -1  -7   55.63    1.95 
  -9   1  -7   54.78    1.89 
  -8   9  -7   53.74    2.03 
  -1  -8   7   55.59    1.78 
   9  -1   7   55.06    2.36 
   8  -9   7   53.28    2.08 
  -9   1   7   55.73    2.00 
   1   8   7   55.14    2.34 
  -8   9   7   55.55    1.83 
   8  -9   7   53.84    1.80 
  -9   2  -7   41.84    1.56 
  -7   9  -7   39.65    1.66 
   2   7  -7   44.24    1.70 
   2   7  -7   40.56    1.47 
  -2  -7  -7   43.03    1.57 
  -7   9  -7   43.01    1.49 
   9  -2  -7   39.83    1.56 
   7  -9  -7   40.49    1.80 
   7  -9   7   41.11    1.69 
  -2  -7   7   41.75    1.43 
  -7   9   7   44.27    1.52 
  -9   2   7   39.81    1.60 
   9  -2   7   42.62    1.93 
  -3  -6  -7   -0.14    0.21 
  -6   9  -7    0.63    0.33 
   6  -9  -7   -0.21    0.28 
  -6   9  -7    0.36    0.29 
   9  -3  -7    0.02    0.27 
   3   6  -7    0.13    0.25 
  -9   3  -7    0.35    0.26 
  -3  -6   7   -0.01    0.22 
   6  -9   7   -0.28    0.20 
  -9   3   7   -0.04    0.27 
   3   6   7    0.11    0.32 
   9  -3   7    0.44    0.36 
  -6   9   7   -0.05    0.23 
  -5   9  -7   39.42    1.69 
   5  -9  -7   43.36    1.60 
   9  -4  -7   38.94    1.46 
  -4  -5  -7   40.05    1.50 
  -9   4  -7   44.36    1.55 
   4   5  -7   38.56    1.46 
   5  -9  -7   36.81    1.73 
  -5   9  -7   39.08    1.44 
   5  -9   7   39.06    1.56 
  -4  -5   7   40.96    1.58 
  -5   9   7   38.57    1.42 
   9  -4   7   39.37    1.74 
   4   5   7   38.08    1.82 
  -9   4   7   38.12    1.51 
   4  -9  -7   65.66    2.51 
   5   4  -7   63.79    2.10 
  -5  -4  -7   66.69    2.14 
  -9   5  -7   64.72    2.16 
  -4   9  -7   63.15    2.04 
   9  -5  -7   65.54    2.07 
   4  -9  -7   65.50    2.19 
  -4   9  -7   65.15    2.39 
  -4   9   7   65.48    2.04 
   9  -5   7   62.15    2.39 
  -9   5   7   66.66    2.15 
   4  -9   7   64.27    2.21 
  -5  -4   7   67.06    2.22 
   5   4   7   64.69    2.57 
  -9   6  -7    0.84    0.33 
   3  -9  -7    0.74    0.33 
   9  -6  -7    1.17    0.40 
   3  -9  -7    1.13    0.45 
  -3   9  -7    1.24    0.34 
  -3   9  -7    1.24    0.46 
  -6  -3  -7    0.91    0.32 
   6   3  -7    1.16    0.36 
   9  -6  -7    1.43    0.34 
   3  -9   7    1.10    0.32 
   9  -6   7    0.76    0.37 
   6   3   7    1.30    0.49 
  -3   9   7    1.25    0.34 
  -6  -3   7    1.33    0.37 
  -9   6   7    1.31    0.34 
  -2   9  -7   54.34    1.80 
  -2   9  -7   53.78    2.05 
  -9   7  -7   55.06    1.97 
   9  -7  -7   55.82    1.83 
   7   2  -7   53.29    1.91 
   2  -9  -7   54.89    1.90 
  -7  -2  -7   57.37    1.91 
   9  -7  -7   52.85    2.07 
   2  -9  -7   51.05    2.22 
   9  -7   7   52.41    2.10 
  -2   9   7   53.56    1.79 
   7   2   7   56.98    2.36 
  -7  -2   7   54.86    1.96 
   2  -9   7   55.51    1.94 
  -9   7   7   53.27    1.70 
  -9   7   7   56.01    1.85 
  -9   8  -7   58.68    2.06 
  -8  -1  -7   56.18    1.91 
   1  -9  -7   55.54    1.95 
  -1   9  -7   56.12    2.11 
   9  -8  -7   55.46    2.18 
   8   1  -7   54.04    1.95 
   9  -8   7   55.44    2.16 
   1  -9   7   54.79    1.82 
   9  -8   7   57.56    1.79 
   8   1   7   55.12    2.38 
  -8  -1   7   58.07    2.03 
  -9   8   7   55.01    1.78 
  -1   9   7   52.36    2.29 
   9   0  -7    0.25    0.33 
  -9   0  -7    0.44    0.31 
   0  -9  -7   -0.04    0.25 
   9  -9  -7    0.42    0.40 
  -9   0  -7    0.06    0.25 
  -9   9  -7    0.05    0.31 
   0   9  -7    0.17    0.34 
   9   0   7   -0.01    0.34 
   9  -9   7    0.12    0.28 
   0   9   7   -0.06    0.30 
  -9   9   7   -0.23    0.25 
  -9   0   7    0.23    0.28 
   0  -9   7   -0.14    0.23 
   9  -9   7    0.54    0.35 
   0   9   7   -0.26    0.24 
  10  -1  -7   26.99    1.30 
  -1  -9  -7   25.40    1.26 
   9 -10  -7   28.29    1.53 
 -10   1  -7   28.23    1.26 
  -9  10  -7   26.84    1.38 
  -9  10   7   25.86    1.17 
  10  -1   7   28.42    1.65 
   9 -10   7   26.57    1.18 
   1   9   7   26.30    1.59 
   9 -10   7   26.96    1.43 
 -10   1   7   27.02    1.33 
  -1  -9   7   27.02    1.16 
  -8  10  -7    1.22    0.37 
   8 -10  -7    1.08    0.50 
  -2  -8  -7    0.94    0.37 
 -10   2  -7    1.48    0.41 
  10  -2  -7    1.46    0.43 
  -8  10  -7    0.84    0.41 
  10  -2   7    1.41    0.51 
  -2  -8   7    0.66    0.35 
  -8  10   7    1.31    0.40 
 -10   2   7    1.01    0.41 
   8 -10   7    2.04    0.48 
   2   8   7    0.13    0.38 
   3   7  -7   42.42    1.61 
   7 -10  -7   44.41    2.00 
  -7  10  -7   44.15    1.83 
  10  -3  -7   44.51    1.67 
 -10   3  -7   44.27    1.68 
  -3  -7  -7   44.04    1.70 
  -7  10  -7   44.47    1.62 
   7 -10   7   43.11    1.80 
  -3  -7   7   45.16    1.74 
   3   7   7   43.99    2.08 
  10  -3   7   45.48    2.06 
  -7  10   7   44.46    1.62 
 -10   3   7   43.13    1.72 
  -6  10  -7   36.94    1.64 
  -6  10  -7   31.46    1.34 
   4   6  -7   31.33    1.35 
   6 -10  -7   34.87    1.71 
  10  -4  -7   34.95    1.39 
  -4  -6  -7   34.33    1.42 
 -10   4  -7   34.37    1.44 
  -4  -6   7   33.51    1.44 
 -10   4   7   32.83    1.43 
  10  -4   7   32.90    1.69 
   6 -10   7   33.98    1.48 
   4   6   7   34.61    1.79 
  -5  10  -7   -0.18    0.29 
  -5  10  -7   -0.03    0.36 
   5 -10  -7   -0.06    0.33 
   5   5  -7    0.01    0.29 
 -10   5  -7    0.06    0.29 
  10  -5  -7    0.15    0.26 
  -5  -5  -7    0.25    0.29 
  -5  10   7   -0.27    0.25 
   5 -10   7   -0.39    0.21 
  10  -5   7    0.22    0.34 
   5   5   7    0.11    0.32 
  -5  -5   7   -0.05    0.27 
 -10   5   7   -0.21    0.27 
   4 -10  -7   40.58    1.93 
 -10   6  -7   39.06    1.58 
  10  -6  -7   37.20    1.45 
  -6  -4  -7   38.29    1.54 
  -4  10  -7   41.24    1.78 
  -4  10  -7   37.81    1.49 
   6   4  -7   39.03    1.55 
 -10   6   7   38.72    1.54 
   6   4   7   37.53    1.92 
  -6  -4   7   39.66    1.60 
   4 -10   7   39.17    1.60 
  10  -6   7   38.41    1.77 
  -7  -3  -7   35.49    1.47 
 -10   7  -7   34.55    1.51 
   7   3  -7   35.49    1.49 
  -3  10  -7   36.25    1.43 
  -3  10  -7   37.04    1.65 
   3 -10  -7   34.17    1.78 
   3 -10  -7   33.07    1.47 
  10  -7   7   35.90    1.71 
  -7  -3   7   37.22    1.54 
   3 -10   7   38.83    1.55 
 -10   7   7   36.23    1.45 
  -3  10   7   36.26    1.42 
   7   3   7   38.06    1.90 
   8   2  -7    0.80    0.39 
  -8  -2  -7    0.76    0.37 
 -10   8  -7    0.90    0.39 
   2 -10  -7    1.04    0.38 
   2 -10  -7    0.36    0.41 
  -2  10  -7    0.44    0.33 
  10  -8  -7    0.80    0.44 
  -2  10   7    0.71    0.33 
   8   2   7    0.51    0.43 
  10  -8   7    0.87    0.46 
  -8  -2   7    1.30    0.40 
   1 -10  -7   33.35    1.83 
  -9  -1  -7   37.84    1.51 
 -10   9  -7   37.13    1.64 
  10  -9  -7   35.93    1.76 
   9   1  -7   39.13    1.59 
   1 -10  -7   38.38    1.56 
   1 -10   7   34.45    1.41 
  10  -9   7   36.16    1.73 
   9   1   7   36.93    1.96 
  -9  -1   7   33.64    1.54 
  -1  10   7   39.42    1.47 
   0 -10  -7   16.94    1.04 
  10   0  -7   17.88    1.10 
 -10  10  -7   18.62    1.16 
 -10   0  -7   17.91    1.02 
  10 -10  -7   15.39    1.22 
   0  10   7   17.28    1.33 
   0  10   7   18.79    0.99 
 -10  10   7   19.25    0.99 
   0 -10   7   17.23    1.00 
  10 -10   7   17.60    1.19 
 -10   0   7   17.10    1.09 
  10   0   7   17.06    1.36 
  10 -11  -7    0.08    0.47 
  -1 -10  -7    0.17    0.34 
 -11   1  -7   -0.17    0.29 
  11  -1  -7   -0.18    0.36 
 -10  11  -7    0.29    0.46 
 -10  11   7   -0.31    0.32 
  10 -11   7   -0.18    0.38 
  10 -11   7   -0.13    0.30 
   1  10   7   -0.42    0.40 
 -11   1   7   -0.35    0.35 
  -9  11  -7   27.36    1.44 
   9 -11  -7   25.89    1.57 
  -2  -9  -7   25.35    1.30 
  11  -2  -7   26.69    1.35 
  -9  11  -7   25.29    1.21 
 -11   2  -7   25.77    1.28 
  -9  11   7   29.49    1.29 
  11  -2   7   28.23    1.71 
   9 -11   7   24.20    1.40 
   2   9   7   25.95    1.68 
   9 -11   7   26.74    1.23 
 -11   2   7   25.82    1.35 
  -8  11  -7   37.17    1.50 
  -8  11  -7   36.93    1.74 
 -11   3  -7   40.42    1.61 
   8 -11  -7   39.30    1.94 
  -3  -8  -7   37.58    1.61 
  11  -3  -7   38.78    1.59 
 -11   3   7   36.70    1.64 
  -8  11   7   35.57    1.49 
  -3  -8   7   36.35    1.59 
   8 -11   7   37.65    1.71 
   3   8   7   38.58    1.98 
  11  -3   7   36.85    1.97 
   4   7  -7   -0.16    0.31 
  -7  11  -7    0.00    0.34 
  -7  11  -7    0.28    0.44 
  11  -4  -7    0.12    0.32 
   7 -11  -7   -0.12    0.41 
  -4  -7  -7    0.08    0.29 
 -11   4  -7    0.38    0.34 
   4   7   7   -0.20    0.38 
   7 -11   7    0.44    0.33 
  -4  -7   7   -0.47    0.26 
  -7  11   7    0.35    0.33 
  11  -4   7    0.29    0.41 
 -11   4   7    0.19    0.34 
  -5  -6  -7   40.56    1.66 
  11  -5  -7   38.55    1.58 
  -6  11  -7   46.55    1.98 
 -11   5  -7   43.12    1.70 
   6 -11  -7   40.16    2.00 
   5   6  -7   42.74    1.65 
  -6  11  -7   45.63    1.65 
  -5  -6   7   38.96    1.67 
  11  -5   7   40.10    1.97 
   6 -11   7   39.99    1.74 
 -11   5   7   39.93    1.67 
  -6  11   7   42.12    1.60 
   5   6   7   41.66    2.07 
  -5  11  -7   28.16    1.30 
   6   5  -7   27.92    1.33 
   5 -11  -7   28.53    1.64 
 -11   6  -7   29.06    1.36 
  -6  -5  -7   27.14    1.31 
  -5  11  -7   27.29    1.52 
   6   5   7   27.20    1.64 
  -5  11   7   27.07    1.26 
   5 -11   7   27.09    1.36 
  -6  -5   7   29.43    1.37 
  11  -6   7   28.95    1.57 
 -11   6   7   29.55    1.36 
  -4  11  -7   -0.53    0.33 
   7   4  -7    0.01    0.36 
 -11   7  -7   -0.24    0.28 
   4 -11  -7    0.61    0.51 
  -7  -4  -7    0.20    0.33 
   7   4   7   -0.08    0.36 
  -4  11   7   -0.17    0.28 
  11  -7   7    0.20    0.38 
 -11   7   7   -0.12    0.31 
  -7  -4   7    0.37    0.32 
   4 -11   7    0.34    0.30 
  -8  -3  -7   29.31    1.36 
   3 -11  -7   30.48    1.73 
 -11   8  -7   29.86    1.45 
   8   3  -7   29.27    1.41 
  -3  11  -7   30.46    1.34 
  -8  -3   7   27.73    1.39 
  -3  11   7   29.46    1.32 
   8   3   7   29.12    1.74 
  11  -8   7   31.24    1.64 
  -9  -2  -7   31.55    1.44 
   9   2  -7   30.76    1.46 
  -2  11  -7   32.29    1.38 
   2 -11  -7   29.46    1.75 
 -11   9  -7   28.73    1.49 
   2 -11   7   28.79    1.33 
   9   2   7   31.82    1.86 
  -9  -2   7   31.61    1.47 
  11  -9   7   30.45    1.63 
  -2  11   7   33.05    1.39 
 -10  -1  -7    0.68    0.39 
  10   1  -7    0.37    0.44 
  11 -10  -7    0.23    0.50 
 -11  10  -7    0.24    0.43 
   1 -11  -7    0.31    0.44 
   1 -11   7    0.14    0.32 
 -10  -1   7    0.55    0.39 
  -1  11   7    0.19    0.35 
  11 -10   7    0.34    0.46 
  10   1   7    0.92    0.61 
  11 -11  -7   26.51    1.68 
   0 -11  -7   30.29    1.50 
 -12   3  -7    0.98    0.42 
  -9  12  -7    0.91    0.53 
   9 -12  -7    0.56    0.53 
  12  -3  -7    0.06    0.37 
   9 -12   7    1.52    0.51 
   8 -12  -7   20.16    1.48 
 -12   4  -7   23.23    1.25 
  -8  12  -7   21.43    1.43 
  12  -4  -7   20.10    1.18 
  -4  -8  -7   21.85    1.27 
  -8  12  -7   20.91    1.18 
   8 -12   7   20.80    1.28 
 -12   4   7   21.26    1.31 
  -8  12   7   21.93    1.22 
  -5  -7  -7   32.01    1.54 
 -12   5  -7   35.07    1.58 
  12  -5  -7   35.32    1.51 
   5   7  -7   34.33    1.52 
  -7  12  -7   34.49    1.52 
   7 -12  -7   34.12    1.90 
  12  -5   7   33.99    1.94 
   7 -12   7   32.79    1.64 
   5   7   7   33.32    1.93 
  -5  -7   7   32.98    1.52 
 -12   5   7   34.96    1.60 
  -7  12   7   34.43    1.50 
   6   6  -7    0.13    0.39 
 -12   6  -7    0.04    0.36 
  -6  12  -7    0.01    0.37 
  -6  -6  -7    0.13    0.31 
   6 -12  -7   -0.15    0.45 
 -12   6   7   -0.07    0.33 
  -6  -6   7   -0.13    0.31 
   6   6   7    0.25    0.44 
  12  -6   7    0.25    0.45 
  -6  12   7    0.54    0.38 
   6 -12   7   -0.16    0.32 
   7   5  -7   25.34    1.30 
  -7  -5  -7   24.38    1.27 
 -12   7  -7   24.76    1.33 
  -5  12  -7   23.63    1.26 
   5 -12  -7   22.60    1.57 
   7   5   7   24.14    1.62 
  -5  12   7   22.58    1.22 
 -12   7   7   23.28    1.27 
  12  -7   7   21.39    1.45 
   5 -12   7   22.15    1.28 
  -7  -5   7   24.89    1.29 
   8   4  -7   27.33    1.49 
   4 -12  -7   20.41    1.54 
  -4  12  -7   23.65    1.27 
  -8  -4  -7   23.71    1.32 
  -4  12   7   25.60    1.27 
  12  -8   7   22.61    1.61 
 -12   8   7   23.33    1.26 
  -8  -4   7   20.29    1.22 
   0   0  -8   70.58    2.04 
   0   0  -8   69.41    2.00 
   0   0   8   68.58    1.91 
   0   0   8   67.81    1.95 
   0  -1  -8   28.58    1.06 
  -1   0  -8   30.06    1.05 
   0   1  -8   30.72    1.12 
   0  -1  -8   32.94    1.04 
  -1   1  -8   29.82    1.10 
   1   0  -8   28.65    1.09 
   1   0  -8   28.33    1.05 
   1  -1  -8   28.74    1.04 
  -1   0  -8   30.26    1.04 
  -1   1  -8   31.39    1.03 
   1  -1  -8   29.93    1.07 
   0   1  -8   29.49    1.03 
   1   0   8   31.45    1.05 
   1  -1   8   30.66    1.04 
  -1   0   8   30.43    1.05 
   1   0   8   30.25    1.02 
  -1   1   8   29.27    1.04 
   0  -1   8   32.12    1.06 
   0   1   8   31.70    1.01 
   1  -1   8   30.05    0.96 
   0   1   8   30.95    1.05 
  -1   1   8   29.46    0.91 
   2  -1  -8  148.15    3.98 
  -1  -1  -8  154.28    3.93 
  -2   1  -8  149.29    3.97 
   2  -1  -8  148.61    3.97 
  -1   2  -8  150.62    4.10 
   1  -2  -8  142.36    3.88 
  -2   1  -8  149.26    3.89 
   1  -2  -8  149.46    3.99 
  -1  -1  -8  149.70    3.93 
   1   1  -8  143.72    4.06 
  -1   2  -8  145.31    3.86 
   1   1  -8  142.50    3.90 
   2  -1   8  150.28    3.80 
   1  -2   8  146.99    3.77 
   1   1   8  169.97    4.18 
   1   1   8  145.76    3.78 
  -1   2   8  146.00    4.06 
  -1  -1   8  148.19    3.80 
  -2   1   8  146.90    3.80 
   2  -1   8  155.62    4.08 
   1  -2   8  151.91    3.94 
  -1   2   8  152.74    3.78 
   0   2  -8   18.19    0.86 
   2   0  -8   18.83    0.79 
   2  -2  -8   18.53    0.67 
   0  -2  -8   18.75    0.79 
   0   2  -8   18.51    0.73 
   0  -2  -8   20.19    0.70 
   2   0  -8   17.82    0.81 
   2  -2  -8   19.03    0.82 
  -2   0  -8   19.21    0.74 
  -2   0  -8   18.78    0.73 
  -2   2  -8   18.51    0.71 
  -2   2  -8   18.94    0.82 
   0  -2   8   18.98    0.76 
   0   2   8   18.92    0.78 
  -2   2   8   18.90    0.75 
  -2   0   8   18.67    0.77 
   0   2   8   20.00    0.75 
   2   0   8   21.39    0.82 
   2  -2   8   19.18    0.71 
   2  -2   8   19.03    0.75 
   2   0   8   19.05    0.76 
  -2   3  -8   19.42    0.88 
  -1  -2  -8   20.93    0.72 
   2  -3  -8   21.12    0.88 
   2  -3  -8   19.49    0.79 
  -3   1  -8   20.51    0.79 
  -2   3  -8   19.00    0.71 
   3  -1  -8   19.71    0.83 
  -3   1  -8   20.79    0.76 
   1   2  -8   20.17    0.78 
  -1  -2  -8   17.22    0.79 
   1   2  -8   20.21    0.92 
  -1  -2   8   19.66    0.79 
   1   2   8   19.87    0.87 
   3  -1   8   20.39    0.80 
   2  -3   8   19.78    0.77 
  -2   3   8   19.84    0.77 
   2  -3   8   21.09    0.73 
   3  -1   8   19.85    0.84 
   1   2   8   19.52    0.75 
  -3   1   8   19.59    0.79 
  -2   3   8   20.78    0.69 
  -3   1   8   19.37    0.81 
  -2  -1  -8   81.34    2.30 
   3  -2  -8   82.45    2.25 
  -1   3  -8   79.00    2.47 
  -3   2  -8   82.15    2.35 
   3  -2  -8   78.87    2.38 
  -1   3  -8   79.43    2.21 
   2   1  -8   79.54    2.44 
   2   1  -8   79.26    2.29 
  -3   2  -8   81.78    2.24 
   1  -3  -8   78.87    2.38 
   1  -3  -8   82.80    2.15 
  -2  -1  -8   83.03    2.23 
   1  -3   8   82.98    2.22 
  -2  -1   8   81.30    2.26 
   2   1   8   81.27    2.22 
  -3   2   8   85.87    2.31 
  -1   3   8   83.65    2.45 
  -3   2   8   84.58    2.25 
   3  -2   8   81.63    2.39 
   3  -2   8   81.86    2.24 
  -1   3   8   79.78    2.21 
   1  -3   8   84.06    2.24 
   2   1   8   82.76    2.51 
   3   0  -8   93.16    2.62 
  -3   0  -8   91.43    2.54 
   0   3  -8   87.11    2.75 
  -3   3  -8   91.91    2.48 
   3  -3  -8   91.02    2.63 
  -3   0  -8   93.00    2.56 
   3  -3  -8   94.41    2.69 
   0   3  -8   95.54    2.52 
  -3   3  -8   92.27    2.68 
   0  -3  -8   94.19    2.64 
   0  -3   8   96.65    2.50 
  -3   0   8   94.51    2.53 
  -3   3   8   91.80    2.49 
   3   0   8   97.09    2.52 
   3   0   8   91.67    2.81 
   3  -3   8   94.30    2.49 
   3  -3   8   94.11    2.66 
   0  -3   8   92.83    2.50 
  -3   3   8   92.21    2.53 
   0   3   8   95.21    2.48 
   0   3   8   94.78    2.80 
  -3   0   8   94.07    2.70 
  -3   4  -8   12.67    0.68 
  -3   4  -8   11.87    0.48 
   1   3  -8   12.03    0.72 
   3  -4  -8   12.07    0.68 
   4  -1  -8   11.15    0.60 
  -4   1  -8   11.86    0.58 
   3  -4  -8   12.16    0.62 
   1   3  -8   12.02    0.55 
  -1  -3  -8   11.38    0.60 
  -4   1  -8   12.75    0.57 
   3  -4   8   11.32    0.55 
  -4   1   8   12.45    0.64 
   4  -1   8   12.17    0.59 
   1   3   8   11.46    0.69 
   1   3   8   12.74    0.56 
  -3   4   8   11.83    0.48 
  -1  -3   8   11.95    0.58 
  -4   1   8   10.81    0.57 
   3  -4   8   12.83    0.59 
   4  -1   8   11.22    0.67 
  -3   4   8   10.59    0.56 
   2  -4  -8   93.15    2.80 
   2   2  -8   94.63    2.62 
  -2  -2  -8   95.92    2.51 
  -4   2  -8   96.36    2.67 
  -2  -2  -8   92.77    2.64 
   2  -4  -8   95.30    2.75 
  -2   4  -8   91.65    2.82 
   4  -2  -8   93.79    2.70 
   4  -2  -8   95.72    2.61 
   2   2  -8   90.27    2.81 
  -4   2  -8   99.25    2.56 
   2   2   8   96.26    2.91 
   2   2   8   93.88    2.48 
   2  -4   8   94.23    2.54 
  -2  -2   8   92.31    2.55 
   4  -2   8   92.31    2.54 
  -4   2   8   95.89    2.66 
   2  -4   8   97.65    2.66 
   4  -2   8   97.32    2.82 
  -4   2   8   94.01    2.52 
  -2   4   8   92.15    2.51 
   4  -3  -8   29.26    1.01 
   4  -3  -8   27.72    1.10 
  -3  -1  -8   29.91    0.97 
  -1   4  -8   28.65    0.93 
  -3  -1  -8   28.70    1.03 
  -4   3  -8   30.34    1.11 
  -4   3  -8   27.48    0.94 
  -1   4  -8   28.64    1.21 
   3   1  -8   30.40    1.07 
   3   1  -8   29.77    1.16 
   1  -4  -8   27.97    1.10 
  -4   3   8   29.82    1.01 
   1  -4   8   30.01    0.96 
   4  -3   8   34.06    1.13 
   4  -3   8   29.87    1.01 
   3   1   8   29.28    1.21 
  -1   4   8   26.47    1.17 
  -1   4   8   29.82    1.02 
   3   1   8   31.14    1.00 
   1  -4   8   29.41    1.02 
  -4   3   8   28.62    1.00 
  -3  -1   8   30.21    1.05 
  -4   0  -8    9.80    0.53 
   4  -4  -8    9.16    0.53 
   4  -4  -8   10.50    0.63 
   0   4  -8    9.90    0.68 
   4   0  -8    9.60    0.57 
  -4   0  -8   10.93    0.51 
   0   4  -8    9.87    0.48 
  -4   4  -8   10.86    0.62 
  -4   4   8    9.79    0.54 
   0  -4   8   10.35    0.55 
   0  -4   8   10.24    0.44 
   4   0   8    9.28    0.65 
   4  -4   8    9.59    0.54 
   4   0   8   10.11    0.52 
  -4   0   8    9.96    0.61 
   0   4   8   10.17    0.51 
  -4   0   8   10.14    0.55 
   0   4   8    9.69    0.64 
  -4   4   8    9.91    0.47 
   4  -4   8    9.73    0.53 
  -5   1  -8   98.84    2.79 
  -1  -4  -8   99.77    2.85 
   1   4  -8   95.48    3.02 
  -5   1  -8  101.70    2.74 
  -4   5  -8  102.19    2.97 
   1   4  -8  101.54    2.73 
   5  -1  -8   99.77    2.85 
   4  -5  -8  104.16    2.94 
   4  -5  -8  101.11    3.00 
   4  -5   8   99.93    2.92 
   4  -5   8  100.16    2.69 
   1   4   8   99.17    3.14 
   5  -1   8   99.58    2.66 
  -5   1   8  108.85    2.93 
  -1  -4   8   98.94    2.68 
   1   4   8   97.76    2.64 
  -5   1   8  100.31    2.66 
  -4   5   8   98.02    2.69 
   5  -1   8  100.50    3.11 
  -5   2  -8   32.10    1.14 
   3  -5  -8   33.09    1.26 
   3  -5  -8   30.51    1.22 
   2   3  -8   33.10    1.31 
  -3   5  -8   32.57    1.29 
   5  -2  -8   35.23    1.21 
  -2  -3  -8   31.21    1.15 
  -5   2  -8   33.03    1.06 
  -5   2   8   32.24    1.06 
   3  -5   8   30.88    1.09 
   5  -2   8   28.85    1.07 
  -5   2   8   31.28    1.15 
  -3   5   8   30.40    1.09 
  -2  -3   8   32.79    1.10 
   2   3   8   31.28    1.03 
   3  -5   8   31.03    1.11 
   2   3   8   32.75    1.35 
   5  -2   8   32.09    1.28 
   3   2  -8   19.31    0.94 
   5  -3  -8   20.73    0.79 
   2  -5  -8   17.90    0.92 
  -3  -2  -8   20.03    0.70 
   2  -5  -8   19.16    0.90 
   5  -3  -8   18.91    0.87 
  -5   3  -8   19.51    0.72 
   3   2  -8   21.04    0.85 
  -3  -2  -8   19.92    0.83 
  -5   3  -8   19.24    0.84 
  -3  -2   8   19.61    0.81 
   5  -3   8   20.45    0.79 
   5  -3   8   18.77    0.88 
  -5   3   8   18.82    0.80 
   2  -5   8   20.21    0.80 
   3   2   8   19.68    0.99 
  -5   3   8   20.74    0.78 
   2  -5   8   19.36    0.77 
   3   2   8   20.12    0.74 
  -2   5   8   19.47    0.80 
   5  -4  -8   96.57    2.85 
  -4  -1  -8  100.28    2.68 
   4   1  -8   99.94    2.77 
  -4  -1  -8   97.00    2.74 
  -5   4  -8   96.05    2.83 
   5  -4  -8  100.52    2.85 
  -1   5  -8   99.05    2.59 
   1  -5  -8   97.87    2.82 
  -1   5  -8  105.18    3.02 
   5  -4   8  100.44    2.63 
  -5   4   8   95.04    2.60 
   4   1   8   85.96    2.54 
  -5   4   8   98.17    2.72 
   5  -4   8   99.33    2.93 
  -1   5   8   97.17    2.63 
  -4  -1   8   97.81    2.90 
  -1   5   8   98.49    3.06 
   4   1   8   98.43    3.11 
   1  -5   8   95.51    2.64 
   1  -5   8  101.99    2.77 
  -4  -1   8  103.05    2.67 
   5   0  -8   38.60    1.34 
   5  -5  -8   37.15    1.38 
  -5   5  -8   39.69    1.41 
   0   5  -8   36.90    1.19 
  -5   0  -8   38.79    1.28 
  -5   0  -8   37.18    1.24 
   5  -5  -8   37.46    1.39 
   0  -5  -8   36.15    1.34 
   0   5  -8   38.74    1.51 
  -5   5   8   36.20    1.23 
  -5   5   8   38.38    1.20 
   5  -5   8   37.73    1.38 
   0  -5   8   38.69    1.26 
   0   5   8   37.05    1.22 
  -5   0   8   37.01    1.24 
   5   0   8   37.61    1.18 
   0   5   8   38.20    1.52 
   5  -5   8   38.23    1.25 
   5   0   8   38.89    1.56 
  -5   0   8   37.26    1.39 
  -1  -5  -8   42.25    1.48 
   1   5  -8   40.80    1.34 
   6  -1  -8   40.44    1.45 
   1   5  -8   39.06    1.60 
   5  -6  -8   40.55    1.50 
   5  -6  -8   42.12    1.57 
  -6   1  -8   41.25    1.35 
  -6   1  -8   41.06    1.39 
  -5   6  -8   41.90    1.54 
  -1  -5   8   43.38    1.37 
   1   5   8   41.08    1.31 
   5  -6   8   42.18    1.49 
   5  -6   8   41.60    1.37 
   1   5   8   40.27    1.68 
  -6   1   8   43.96    1.31 
   6  -1   8   41.12    1.67 
  -6   1   8   42.25    1.50 
  -5   6   8   40.23    1.36 
  -6   2  -8   21.51    0.91 
  -2  -4  -8   22.48    0.96 
   4  -6  -8   21.89    1.04 
   2   4  -8   21.78    1.07 
  -4   6  -8   21.40    1.04 
   6  -2  -8   21.91    0.95 
   2   4  -8   22.02    0.89 
   4  -6  -8   20.88    1.00 
  -6   2  -8   22.85    0.83 
   6  -2   8   22.87    0.87 
  -4   6   8   22.66    0.91 
  -2  -4   8   23.16    0.88 
   4  -6   8   22.23    0.94 
  -6   2   8   23.44    0.84 
   2   4   8   23.06    1.15 
  -6   2   8   22.62    0.97 
   2   4   8   22.83    0.83 
   4  -6   8   23.33    0.91 
   3   3  -8   94.81    2.70 
   3  -6  -8   96.02    2.85 
   3  -6  -8   96.87    3.01 
  -3   6  -8   92.29    2.96 
  -3  -3  -8   96.02    2.72 
   6  -3  -8   96.95    2.78 
   3   3  -8   97.51    2.93 
  -6   3  -8   94.59    2.76 
  -6   3   8   95.76    2.53 
   3  -6   8   97.38    2.80 
   3  -6   8   93.41    2.60 
  -3  -3   8   95.30    2.59 
  -3   6   8   94.32    2.61 
   3   3   8   97.60    3.12 
   6  -3   8   97.21    2.98 
   3   3   8   93.74    2.49 
  -6   3   8   93.64    2.74 
   6  -3   8   96.60    2.59 
   4   2  -8   20.27    0.88 
   2  -6  -8   20.27    0.93 
   6  -4  -8   20.56    0.88 
   6  -4  -8   18.78    0.91 
  -6   4  -8   18.66    0.88 
   2  -6  -8   19.03    1.02 
  -2   6  -8   20.71    1.06 
  -4  -2  -8   20.30    0.87 
  -6   4   8   19.84    0.83 
   2  -6   8   19.45    0.81 
  -4  -2   8   19.27    0.82 
   6  -4   8   19.71    0.94 
   4   2   8   20.10    0.72 
   6  -4   8   18.77    0.78 
  -6   4   8   18.84    0.77 
  -4  -2   8   21.33    0.99 
  -2   6   8   18.36    0.81 
   2  -6   8   18.34    0.81 
   4   2   8   20.96    1.08 
   5   1  -8    7.70    0.56 
  -5  -1  -8    8.49    0.48 
  -1   6  -8    7.88    0.69 
   1  -6  -8    7.16    0.56 
   6  -5  -8    8.37    0.57 
   6  -5  -8    8.59    0.60 
  -5  -1  -8    7.76    0.54 
  -6   5  -8    7.60    0.59 
  -1   6   8    8.10    0.67 
   1  -6   8    7.85    0.48 
  -6   5   8    7.23    0.49 
   1  -6   8    8.35    0.53 
   6  -5   8    7.32    0.57 
  -5  -1   8    8.22    0.62 
  -5  -1   8    8.26    0.52 
   6  -5   8    7.75    0.51 
   5   1   8    7.73    0.68 
  -1   6   8    8.55    0.52 
  -6   5   8    8.15    0.50 
   6   0  -8   79.65    2.44 
   6  -6  -8   85.98    2.50 
   6  -6  -8   79.79    2.60 
   0   6  -8   80.17    2.64 
   0  -6  -8   83.38    2.48 
  -6   0  -8   79.70    2.35 
  -6   6  -8   82.89    2.55 
   0   6  -8   82.87    2.30 
  -6   0  -8   79.23    2.36 
  -6   0   8   79.75    2.52 
   0  -6   8   81.38    2.31 
  -6   6   8   79.91    2.28 
   0   6   8   79.79    2.77 
   6  -6   8   81.86    2.59 
   6  -6   8   81.48    2.30 
   6   0   8   85.05    2.83 
   0   6   8   79.09    2.28 
  -7   1  -8   14.91    0.73 
   1   6  -8   14.46    0.70 
  -7   1  -8   16.15    0.77 
   1   6  -8   14.01    0.90 
   6  -7  -8   13.81    0.82 
  -6   7  -8   13.93    0.86 
   6  -7  -8   15.08    0.89 
   7  -1  -8   14.47    0.80 
  -1  -6  -8   14.98    0.81 
  -7   1   8   13.50    0.82 
   6  -7   8   14.41    0.73 
  -1  -6   8   14.23    0.73 
   6  -7   8   15.35    0.83 
   1   6   8   13.60    0.69 
   1   6   8   14.39    0.97 
  -6   7   8   12.89    0.72 
   7  -1   8   16.53    1.00 
  -2  -5  -8   53.47    1.81 
  -5   7  -8   52.79    1.92 
   7  -2  -8   52.96    1.79 
  -7   2  -8   54.66    1.67 
   2   5  -8   51.04    1.94 
   5  -7  -8   55.05    1.88 
  -7   2  -8   54.03    1.77 
   5  -7  -8   55.85    2.00 
   2   5  -8   52.66    1.71 
   5  -7   8   55.09    1.71 
   2   5   8   55.82    2.13 
  -7   2   8   55.55    1.85 
   2   5   8   54.37    1.61 
   7  -2   8   57.33    2.09 
   5  -7   8   54.84    1.87 
  -2  -5   8   57.09    1.68 
  -5   7   8   51.77    1.68 
   7  -3  -8    6.69    0.57 
  -3  -4  -8    5.87    0.52 
   4  -7  -8    7.09    0.64 
  -4   7  -8    7.19    0.69 
   4  -7  -8    7.12    0.60 
   3   4  -8    7.42    0.54 
  -7   3  -8    7.16    0.55 
   3   4  -8    5.96    0.62 
   4  -7   8    5.62    0.49 
   3   4   8    6.44    0.67 
  -3  -4   8    6.05    0.48 
  -7   3   8    6.93    0.56 
  -4   7   8    6.97    0.51 
   4  -7   8    7.65    0.54 
   7  -3   8    6.69    0.63 
  -7   3   8    7.50    0.46 
   3   4   8    7.49    0.44 
  -3   7  -8   43.75    1.78 
   3  -7  -8   43.51    1.78 
   7  -4  -8   46.38    1.59 
  -7   4  -8   44.66    1.59 
   4   3  -8   46.71    1.56 
  -4  -3  -8   46.01    1.57 
   3  -7  -8   44.94    1.63 
   7  -4   8   47.17    1.76 
  -7   4   8   45.53    1.56 
  -4  -3   8   44.11    1.68 
   3  -7   8   48.50    1.52 
   3  -7   8   43.65    1.56 
   7  -4   8   44.83    1.43 
  -4  -3   8   43.19    1.45 
   4   3   8   50.32    1.93 
  -3   7   8   46.59    1.50 
  -7   4   8   46.52    1.41 
   7  -5  -8   50.74    1.76 
  -5  -2  -8   51.81    1.73 
   5   2  -8   52.11    1.75 
  -7   5  -8   50.01    1.79 
   7  -5  -8   55.24    1.86 
   2  -7  -8   55.80    1.82 
   2  -7  -8   50.19    2.01 
  -2   7  -8   53.46    2.00 
   7  -5   8   55.75    1.63 
  -7   5   8   51.65    1.59 
   2  -7   8   51.17    1.66 
   2  -7   8   54.27    1.75 
  -7   5   8   51.23    1.70 
  -2   7   8   53.01    1.66 
   7  -5   8   53.41    1.93 
   5   2   8   52.08    2.09 
  -5  -2   8   52.97    1.86 
  -6  -1  -8    8.95    0.60 
   7  -6  -8    8.77    0.64 
   7  -6  -8    7.87    0.63 
   6   1  -8    8.89    0.64 
   1  -7  -8    9.24    0.66 
  -1   7  -8    9.45    0.75 
  -6  -1  -8    8.87    0.54 
  -7   6  -8    8.79    0.66 
  -1   7   8    8.28    0.56 
   6   1   8    8.40    0.77 
   7  -6   8    8.18    0.55 
  -7   6   8    8.53    0.55 
  -6  -1   8    8.24    0.67 
   1  -7   8    8.50    0.57 
  -1   7   8    8.80    0.75 
  -7   6   8    8.35    0.58 
   7  -6   8    9.16    0.68 
   0   7  -8   19.39    1.08 
   7  -7  -8   21.00    1.06 
   7  -7  -8   19.84    0.96 
  -7   0  -8   17.35    0.87 
  -7   0  -8   18.27    0.85 
   0  -7  -8   18.73    0.95 
  -7   7  -8   17.94    0.99 
   7   0  -8   17.91    0.92 
   0   7   8   19.51    1.18 
   7   0   8   20.22    1.20 
  -7   0   8   18.58    0.98 
   0   7   8   17.37    0.82 
  -7   7   8   18.20    0.85 
   7  -7   8   17.44    0.84 
   0  -7   8   18.58    0.86 
   7  -7   8   19.40    1.00 
  -7   8  -8   65.52    2.22 
  -8   1  -8   63.08    1.99 
   7  -8  -8   63.26    2.30 
  -8   1  -8   63.55    2.03 
   8  -1  -8   61.07    2.08 
  -1  -7  -8   62.17    2.10 
   1   7  -8   61.35    2.25 
   7  -8   8   64.85    2.24 
   1   7   8   63.16    2.46 
   8  -1   8   64.15    2.46 
  -7   8   8   61.07    1.95 
   7  -8   8   61.91    1.95 
  -1  -7   8   60.89    1.91 
  -8   1   8   61.34    2.15 
   1   7   8   62.00    1.89 
  -8   2  -8   17.32    0.86 
   6  -8  -8   17.22    1.02 
   8  -2  -8   15.96    0.87 
  -2  -6  -8   16.07    0.88 
  -6   8  -8   14.71    0.96 
   2   6  -8   15.93    0.80 
   6  -8  -8   15.79    0.92 
   2   6  -8   16.75    0.99 
   6  -8   8   16.85    0.87 
  -2  -6   8   17.68    0.81 
   2   6   8   16.37    1.08 
   2   6   8   16.54    0.74 
   8  -2   8   15.99    1.06 
   6  -8   8   15.60    0.89 
  -8   2   8   16.34    0.92 
  -6   8   8   16.12    0.83 
   8  -3  -8    4.98    0.57 
  -5   8  -8    4.88    0.61 
   5  -8  -8    4.91    0.60 
  -3  -5  -8    5.12    0.52 
   3   5  -8    4.63    0.51 
  -8   3  -8    4.51    0.50 
   5  -8  -8    5.11    0.64 
   5  -8   8    5.07    0.51 
  -3  -5   8    4.77    0.45 
   8  -3   8    4.11    0.60 
  -8   3   8    5.09    0.56 
  -5   8   8    4.36    0.49 
   5  -8   8    3.84    0.47 
  -3  -5   8    5.28    0.60 
   3   5   8    5.48    0.73 
   4  -8  -8   69.30    2.54 
  -4  -4  -8   64.67    2.16 
   8  -4  -8   68.88    2.18 
   4   4  -8   68.47    2.15 
   4  -8  -8   71.34    2.28 
  -4   8  -8   71.58    2.45 
  -8   4  -8   70.16    2.22 
   4  -8   8   68.03    2.09 
  -4  -4   8   67.13    2.31 
   8  -4   8   67.22    2.43 
   4   4   8   67.96    2.56 
  -8   4   8   69.77    2.20 
   4  -8   8   67.41    2.23 
  -4   8   8   67.42    2.07 
   3  -8  -8   25.88    1.35 
  -3   8  -8   25.98    1.32 
  -8   5  -8   27.13    1.17 
   3  -8  -8   25.05    1.16 
  -5  -3  -8   26.45    1.13 
   5   3  -8   25.76    1.12 
   8  -5  -8   26.00    1.12 
  -3   8   8   26.38    1.08 
   3  -8   8   26.89    1.12 
   5   3   8   24.89    1.38 
   8  -5   8   27.02    1.28 
  -8   5   8   25.82    1.10 
  -5  -3   8   27.43    1.23 
  -8   5   8   25.60    0.97 
   3  -8   8   26.40    1.08 
   2  -8  -8   12.30    0.77 
   2  -8  -8   11.70    0.93 
   6   2  -8   11.94    0.79 
  -2   8  -8   11.60    0.90 
   8  -6  -8   13.51    0.78 
  -6  -2  -8   11.45    0.73 
  -8   6  -8   12.64    0.80 
   8  -6   8   12.64    0.68 
   6   2   8   12.59    0.97 
   8  -6   8   12.44    0.83 
  -2   8   8   12.19    0.72 
   2  -8   8   12.05    0.74 
  -6  -2   8   11.77    0.81 
  -8   6   8   12.15    0.72 
  -8   6   8   10.45    0.65 
  -7  -1  -8   53.11    1.80 
  -1   8  -8   54.17    2.02 
   1  -8  -8   43.36    1.80 
   8  -7  -8   53.19    2.00 
   7   1  -8   42.92    1.79 
   8  -7  -8   54.49    1.84 
  -8   7  -8   56.32    1.95 
   8  -7   8   56.43    1.71 
   8  -7   8   52.79    2.01 
  -8   7   8   55.92    1.70 
  -1   8   8   52.05    2.16 
   7   1   8   52.56    2.21 
  -7  -1   8   56.05    1.95 
   1  -8   8   53.85    1.74 
  -1   8   8   55.70    1.73 
   8   0  -8   23.39    1.10 
   0   8  -8   20.42    1.18 
  -8   0  -8   22.68    1.03 
  -8   0  -8   22.73    1.00 
  -8   8  -8   21.17    1.14 
   0  -8  -8   21.94    1.09 
   8  -8  -8   21.28    1.19 
   0   8   8   21.73    0.97 
   0   8   8   21.66    1.30 
   8  -8   8   21.05    1.15 
   8   0   8   21.61    1.34 
  -8   0   8   20.94    1.12 
  -8   8   8   20.72    0.97 
   0  -8   8   20.86    0.97 
   8  -8   8   22.99    1.00 
  -8   9  -8    5.84    0.73 
   9  -1  -8    6.13    0.69 
  -9   1  -8    5.99    0.58 
  -1  -8  -8    6.65    0.68 
  -9   1  -8    6.84    0.63 
   8  -9  -8    6.62    0.78 
   1   8  -8    5.88    0.73 
  -9   1   8    6.04    0.68 
  -8   9   8    6.96    0.62 
  -1  -8   8    7.01    0.60 
   1   8   8    6.03    0.55 
   1   8   8    6.71    0.86 
   8  -9   8    7.31    0.73 
   9  -1   8    8.24    0.91 
   8  -9   8    6.70    0.62 
  -2  -7  -8   16.09    0.94 
  -7   9  -8   16.19    1.04 
   2   7  -8   16.93    1.06 
  -9   2  -8   16.86    0.91 
   9  -2  -8   17.51    0.97 
   7  -9  -8   16.83    1.09 
   7  -9   8   15.06    0.87 
   2   7   8   18.61    1.21 
  -2  -7   8   16.81    0.84 
  -9   2   8   17.53    1.00 
   9  -2   8   15.98    1.13 
   7  -9   8   14.41    0.95 
  -7   9   8   15.17    0.86 
  -3  -6  -8   51.26    1.84 
   3   6  -8   50.80    1.77 
  -6   9  -8   57.22    2.08 
   6  -9  -8   49.86    2.09 
   9  -3  -8   53.58    1.85 
  -9   3  -8   52.45    1.85 
   9  -3   8   50.77    2.15 
  -3  -6   8   53.78    1.97 
   6  -9   8   51.28    1.94 
  -9   3   8   51.56    1.88 
   6  -9   8   49.78    1.75 
  -6   9   8   53.11    1.77 
   3   6   8   55.26    2.25 
  -5   9  -8    9.82    0.90 
   9  -4  -8   10.86    0.74 
  -4  -5  -8   10.42    0.74 
  -9   4  -8    9.77    0.72 
   5  -9  -8   10.47    0.90 
   4   5  -8   10.86    0.74 
   5  -9  -8   11.33    0.81 
   5  -9   8    9.44    0.69 
   5  -9   8   11.58    0.75 
  -5   9   8   11.59    0.73 
  -4  -5   8   10.25    0.81 
   9  -4   8   10.34    0.88 
  -9   4   8    8.98    0.73 
   4   5   8    9.68    0.91 
   4  -9  -8    7.67    0.72 
  -4   9  -8    9.93    0.90 
  -5  -4  -8    7.94    0.67 
   5   4  -8    8.06    0.69 
   4  -9  -8    7.94    0.82 
   9  -5  -8    8.64    0.66 
  -9   5  -8    8.04    0.69 
   9  -5   8    8.42    0.79 
   4  -9   8    8.69    0.66 
   5   4   8    8.53    0.87 
   4  -9   8    9.29    0.67 
  -4   9   8    9.02    0.66 
  -9   5   8    7.84    0.68 
  -5  -4   8    9.06    0.75 
  -6  -3  -8   58.16    1.99 
  -3   9  -8   61.27    2.24 
   3  -9  -8   52.69    2.29 
   3  -9  -8   55.47    2.02 
   6   3  -8   59.56    2.02 
  -9   6  -8   57.44    2.04 
   9  -6  -8   59.37    1.98 
   9  -6   8   58.93    2.25 
   3  -9   8   58.99    1.92 
  -6  -3   8   57.87    2.09 
  -3   9   8   57.46    1.90 
  -9   6   8   62.73    1.98 
   6   3   8   60.49    2.44 
   3  -9   8   56.42    2.05 
   2  -9  -8    8.82    0.72 
  -2   9  -8    9.94    0.85 
  -7  -2  -8    9.27    0.71 
   2  -9  -8    7.20    0.85 
  -9   7  -8    7.23    0.72 
   9  -7  -8    9.01    0.69 
   7   2  -8    8.14    0.74 
  -2   9   8    7.97    0.65 
  -9   7   8    8.78    0.62 
   2  -9   8    8.55    0.68 
   7   2   8   10.39    0.93 
  -9   7   8    7.89    0.72 
   9  -7   8    8.91    0.79 
  -7  -2   8    9.30    0.77 
   1  -9  -8   15.25    0.97 
  -9   8  -8   16.18    1.04 
  -8  -1  -8   17.29    0.94 
  -1   9  -8   15.41    1.07 
   8   1  -8   16.59    0.99 
   9  -8  -8   16.14    1.17 
  -9   8   8   17.64    0.86 
  -1   9   8   16.08    0.87 
  -8  -1   8   14.90    0.98 
  -1   9   8   16.95    1.19 
   8   1   8   15.82    1.18 
   9  -8   8   15.74    1.05 
   1  -9   8   16.07    0.88 
   9  -8   8   15.57    0.87 
  -9   9  -8   43.08    1.82 
  -9   0  -8   44.77    1.67 
   9   0  -8   44.23    1.74 
   0  -9  -8   40.37    1.68 
   9  -9  -8   43.39    1.94 
   0   9  -8   44.04    1.87 
   9   0   8   46.70    2.17 
  -9   0   8   44.70    1.79 
   9  -9   8   46.09    1.60 
   0  -9   8   46.54    1.62 
   0   9   8   38.79    1.99 
  -9   9   8   44.05    1.60 
   9  -9   8   48.03    1.93 
  10  -1  -8    5.31    0.68 
   9 -10  -8    4.87    0.74 
  -9  10  -8    4.23    0.66 
  -1  -9  -8    5.74    0.69 
 -10   1  -8    6.27    0.66 
   1   9   8    5.33    0.83 
 -10   1   8    5.69    0.70 
   9 -10   8    6.69    0.77 
  -9  10   8    5.88    0.64 
   9 -10   8    6.52    0.63 
  -1  -9   8    5.83    0.64 
  10  -1   8    4.10    0.79 
   8 -10  -8   33.91    1.74 
  -8  10  -8   37.73    1.69 
  -2  -8  -8   36.55    1.54 
  10  -2  -8   36.50    1.55 
 -10   2  -8   34.82    1.48 
  -2  -8   8   35.65    1.58 
   2   8   8   34.82    1.86 
  -8  10   8   38.98    1.50 
  10  -2   8   36.14    1.86 
   8 -10   8   34.50    1.62 
   8 -10   8   36.20    1.44 
 -10   2   8   36.28    1.60 
  -7  10  -8   18.95    1.19 
  10  -3  -8   18.50    1.03 
  -3  -7  -8   15.32    0.96 
   7 -10  -8   16.63    1.19 
 -10   3  -8   18.97    1.04 
   3   7  -8   18.73    0.96 
 -10   3   8   17.39    1.06 
  10  -3   8   16.00    1.20 
  -7  10   8   16.24    0.94 
   7 -10   8   18.26    1.05 
   3   7   8   17.81    1.29 
   7 -10   8   16.95    0.95 
  -3  -7   8   16.95    1.04 
  -4  -6  -8   22.07    1.15 
  10  -4  -8   22.40    1.14 
  -6  10  -8   23.09    1.35 
   6 -10  -8   22.98    1.38 
   4   6  -8   22.69    1.13 
 -10   4  -8   21.45    1.13 
  -4  -6   8   22.78    1.20 
   4   6   8   24.55    1.47 
  10  -4   8   25.18    1.43 
   6 -10   8   23.46    1.19 
  -6  10   8   23.63    1.11 
   6 -10   8   23.16    1.10 
 -10   4   8   22.96    1.17 
  -5  10  -8   52.30    1.76 
  10  -5  -8   46.82    1.77 
  -5  -5  -8   49.94    1.84 
 -10   5  -8   47.66    1.84 
  -5  10  -8   51.38    2.12 
   5   5  -8   49.55    1.82 
   5 -10  -8   50.03    2.17 
 -10   5   8   50.44    1.86 
  -5  10   8   51.68    1.77 
  -5  -5   8   47.72    1.89 
   5 -10   8   52.00    1.92 
  10  -5   8   49.83    2.13 
   5 -10   8   46.11    1.72 
   5   5   8   52.56    2.28 
 -10   6  -8   17.37    1.04 
  -6  -4  -8   18.22    1.03 
  -4  10  -8   21.62    1.28 
   4 -10  -8   16.93    1.25 
   6   4  -8   17.88    1.03 
  10  -6  -8   16.74    0.99 
  -6  -4   8   19.95    1.11 
   4 -10   8   19.18    0.99 
 -10   6   8   18.78    1.01 
   6   4   8   18.93    1.31 
   4 -10   8   20.98    1.07 
  -4  10   8   18.81    1.00 
  10  -6   8   19.03    1.21 
   3 -10  -8   10.43    0.83 
 -10   7  -8   12.37    0.90 
   3 -10  -8   12.20    1.06 
  -3  10  -8   12.01    0.99 
  -7  -3  -8   12.39    0.87 
   7   3  -8   13.93    0.92 
 -10   7   8   11.08    0.79 
  -3  10   8   11.68    0.82 
  -7  -3   8   12.02    0.92 
   7   3   8   12.35    1.08 
  10  -7   8   12.59    0.98 
   3 -10   8   12.25    0.80 
 -10   8  -8   56.29    2.10 
   2 -10  -8   51.56    2.36 
   8   2  -8   55.66    2.03 
   2 -10  -8   56.92    2.03 
  -8  -2  -8   51.73    1.95 
  -2  10  -8   52.98    2.13 
   8   2   8   54.44    2.42 
  -2  10   8   58.07    1.90 
  -8  -2   8   55.70    2.09 
   2 -10   8   54.61    1.90 
  10  -8   8   50.23    2.17 
 -10   9  -8   14.78    1.00 
   9   1  -8   10.99    0.90 
   1 -10  -8   10.10    1.06 
  -9  -1  -8   11.15    0.86 
   1 -10  -8   11.08    0.90 
  -9  -1   8   11.17    0.92 
   1 -10   8   10.81    0.78 
  -1  10   8   11.28    0.82 
  10  -9   8   12.00    1.00 
   9   1   8   11.67    1.12 
 -10  10  -8    7.88    0.88 
  10   0  -8    7.33    0.82 
 -10   0  -8    8.51    0.76 
   0 -10  -8    7.57    0.78 
   0  10   8    5.65    0.88 
   0 -10   8    7.31    0.72 
  10 -10   8    8.63    0.91 
 -10   0   8    8.06    0.85 
  10   0   8    7.16    0.97 
 -10  10   8    7.92    0.73 
   0  10   8    7.06    0.70 
  -1 -10  -8   31.94    1.51 
  10 -11  -8   31.85    1.78 
 -10  11  -8   33.07    1.67 
  10 -11   8   31.41    1.65 
  10 -11   8   29.82    1.36 
   9 -11  -8    9.73    1.03 
 -11   2  -8    9.26    0.83 
  -9  11  -8   11.09    1.05 
  11  -2  -8   10.82    0.92 
  -2  -9  -8   10.45    0.88 
  -9  11   8   11.15    0.84 
   9 -11   8    9.31    0.85 
   9 -11   8    9.44    0.89 
  11  -2   8    6.82    1.00 
   2   9   8    8.37    1.13 
 -11   2   8    9.34    0.93 
 -11   3  -8    9.03    0.82 
  -8  11  -8    6.68    0.86 
  -3  -8  -8    7.23    0.78 
   8 -11  -8    7.15    0.96 
  11  -3  -8    5.67    0.71 
  -8  11   8    5.81    0.66 
 -11   3   8    8.76    0.85 
   8 -11   8    7.37    0.79 
   3   8   8    8.24    1.07 
   8 -11   8    6.55    0.71 
  11  -3   8    5.47    0.85 
  -3  -8   8    7.25    0.78 
  -7  11  -8   45.86    2.08 
   4   7  -8   48.08    1.80 
  11  -4  -8   44.51    1.80 
 -11   4  -8   48.69    1.88 
  -4  -7  -8   49.04    1.89 
   7 -11   8   48.39    1.78 
  -4  -7   8   50.53    1.95 
   4   7   8   47.50    2.27 
  11  -4   8   45.90    2.20 
   7 -11   8   45.55    1.95 
  -7  11   8   47.60    1.80 
 -11   4   8   51.45    1.95 
  -6  11  -8    5.49    0.63 
   5   6  -8    4.86    0.64 
  -5  -6  -8    5.78    0.67 
  11  -5  -8    5.67    0.66 
 -11   5  -8    4.79    0.66 
   6 -11  -8    5.45    0.86 
  -6  11  -8    6.31    0.86 
   6 -11   8    6.52    0.71 
  11  -5   8    6.53    0.90 
   5   6   8    4.42    0.79 
  -6  11   8    5.89    0.65 
   6 -11   8    5.97    0.70 
 -11   5   8    5.68    0.71 
  -5  -6   8    6.03    0.75 
   6   5  -8    9.08    0.85 
  -5  11  -8   11.04    1.05 
 -11   6  -8    9.20    0.83 
  11  -6  -8   10.06    0.79 
   5 -11  -8   11.18    1.07 
  -6  -5  -8    9.58    0.84 
  -5  11  -8   10.93    0.84 
  11  -6   8   10.19    0.99 
   5 -11   8    9.74    0.83 
  -6  -5   8   10.02    0.85 
   6   5   8    9.90    1.04 
  -5  11   8    9.62    0.80 
   5 -11   8   10.02    0.80 
 -11   6   8   10.36    0.86 
   7   4  -8   28.17    1.36 
  -7  -4  -8   29.01    1.37 
 -11   7  -8   28.62    1.41 
   4 -11  -8   25.81    1.69 
  11  -7   8   28.27    1.58 
 -11   7   8   29.52    1.37 
   7   4   8   29.06    1.71 
  -7  -4   8   29.18    1.43 
   4 -11   8   30.30    1.32 
  -4  11   8   28.52    1.32 
   3 -11  -8    5.83    0.91 
   8   3  -8    4.31    0.64 
  -8  -3  -8    5.51    0.68 
 -11   8  -8    5.64    0.73 
   8   3   8    5.13    0.87 
  -8  -3   8    5.97    0.73 
  -3  11   8    4.67    0.61 
   3 -11   8    5.31    0.65 
  11  -8   8    2.46    0.58 
   9   2  -8    7.56    0.86 
 -11   9  -8    8.72    0.91 
  -9  -2  -8   11.71    0.92 
   2 -11  -8    8.44    1.02 
  11  -9   8    8.94    0.92 
   9   2   8    9.36    1.05 
  -9  -2   8   10.68    0.94 
   2 -11   8    8.80    0.84 
  -2  11   8   10.91    0.83 
 -10  -1  -8   24.86    1.29 
  -1  11   8   25.15    1.24 
   1 -11   8   27.07    1.27 
  -9  12  -8   32.36    1.89 
   9 -12  -8   32.77    2.05 
   8 -12  -8    9.97    1.15 
  -8  12  -8   10.13    1.12 
  12  -4  -8   11.69    0.96 
   8 -12   8   11.52    0.98 
   5   7  -8    6.24    0.73 
   7 -12  -8    6.99    0.98 
 -12   5  -8    5.79    0.79 
  -7  12  -8    8.46    1.09 
  12  -5  -8    6.02    0.73 
  -5  -7   8    7.32    0.80 
   7 -12   8    6.14    0.80 
 -12   5   8    6.92    0.81 
   6 -12  -8   30.19    1.80 
   6   6  -8   28.62    1.45 
 -12   6   8   31.30    1.52 
  -6  -6   8   33.33    1.55 
   5 -12  -8    9.67    1.12 
   7   5  -8    9.81    0.94 
  -7  -5   8    8.30    0.85 
 -12   7   8   10.36    0.91 
  -8  -4   8    7.75    0.86 
   0   0  -9    0.36    0.18 
   0   0  -9   -0.05    0.14 
   0   0   9   -0.08    0.14 
   0   0   9    0.00    0.08 
  -1   1  -9   51.96    1.71 
   0  -1  -9   50.16    1.65 
  -1   0  -9   51.52    1.66 
  -1   0  -9   52.59    1.64 
   1   0  -9   52.41    1.65 
   1  -1  -9   54.65    1.67 
   1  -1  -9   53.80    1.66 
   0   1  -9   56.36    1.74 
   0  -1  -9   54.94    1.62 
   0   1  -9   52.81    1.62 
   1   0  -9   51.45    1.69 
  -1   1  -9   51.88    1.61 
   0   1   9   52.51    1.58 
   0   1   9   52.51    1.62 
   0  -1   9   51.43    1.61 
  -1   1   9   53.88    1.50 
  -1   1   9   51.56    1.61 
   1   0   9   53.51    1.61 
  -1   0   9   52.47    1.61 
   1   0   9   52.32    1.61 
   1  -1   9   51.38    1.55 
   1  -1   9   57.48    1.65 
   1  -2  -9    5.75    0.46 
   2  -1  -9    5.41    0.44 
  -1  -1  -9    6.57    0.42 
  -1   2  -9    6.13    0.41 
  -1   2  -9    6.17    0.51 
   1  -2  -9    5.96    0.39 
   1   1  -9    7.35    0.53 
  -2   1  -9    6.17    0.42 
  -2   1  -9    5.37    0.42 
  -1  -1  -9    5.94    0.43 
   2  -1  -9    6.30    0.47 
   1   1  -9    6.72    0.46 
   1  -2   9    6.68    0.47 
   2  -1   9    6.58    0.45 
  -1   2   9    6.32    0.45 
  -1  -1   9    6.46    0.46 
  -2   1   9    5.93    0.46 
   1   1   9    6.13    0.42 
   1   1   9    6.36    0.44 
  -1   2   9    6.67    0.38 
   1  -2   9    6.55    0.32 
   2  -1   9    6.10    0.39 
   2   0  -9  117.80    3.42 
   2  -2  -9  122.21    3.29 
   0  -2  -9  119.01    3.36 
   0  -2  -9  124.87    3.25 
  -2   2  -9  123.26    3.25 
   2  -2  -9  118.91    3.37 
  -2   0  -9  124.51    3.31 
   2   0  -9  118.09    3.33 
   2  -2  -9  119.68    3.28 
  -2   0  -9  119.34    3.29 
   0   2  -9  121.46    3.26 
   0   2  -9  123.52    3.46 
  -2   2  -9  118.26    3.41 
   0   2   9  124.70    3.44 
   2   0   9  125.83    3.21 
  -2   2   9  124.16    3.22 
   0  -2   9  122.13    3.22 
   0   2   9  125.48    3.21 
  -2   0   9  124.41    3.23 
   2   0   9  119.15    3.45 
   2  -2   9  125.60    3.35 
   2  -2   9  119.92    3.21 
   2  -3  -9   82.92    2.48 
   3  -1  -9   79.93    2.43 
  -2   3  -9   80.77    2.28 
   2  -3  -9   84.54    2.43 
   1   2  -9   86.28    2.36 
  -2   3  -9   81.05    2.54 
  -3   1  -9   82.50    2.34 
  -1  -2  -9   83.24    2.31 
   1   2  -9   83.87    2.56 
  -3   1  -9   83.56    2.39 
  -1  -2  -9   83.07    2.41 
   1   2   9   84.29    2.32 
  -3   1   9   81.20    2.32 
  -2   3   9   87.35    2.29 
   3  -1   9   80.97    2.32 
   2  -3   9   85.07    2.35 
  -1  -2   9   81.99    2.33 
   1   2   9   85.68    2.55 
   3  -1   9   81.49    2.50 
  -2   3   9   83.99    2.31 
   2  -3   9   80.77    2.30 
  -3   1   9   85.89    2.46 
  -3   2  -9   88.49    2.47 
   2   1  -9   88.99    2.69 
  -1   3  -9   85.96    2.43 
   2   1  -9   90.57    2.54 
  -3   2  -9   88.87    2.59 
   3  -2  -9   85.35    2.60 
   1  -3  -9   88.24    2.61 
  -2  -1  -9   93.74    2.55 
  -1   3  -9   90.80    2.72 
   1  -3  -9   87.02    2.38 
  -2  -1  -9   90.59    2.47 
   3  -2   9   93.00    2.48 
   1  -3   9   94.02    2.45 
  -1   3   9   84.37    2.65 
   2   1   9   90.55    2.71 
  -3   2   9   90.39    2.53 
  -2  -1   9   90.96    2.49 
   2   1   9   85.08    2.43 
  -1   3   9   89.24    2.44 
  -3   2   9   88.68    2.46 
   1  -3   9   89.68    2.45 
   3  -2   9   91.82    2.61 
   3   0  -9    2.59    0.36 
  -3   0  -9    2.17    0.30 
  -3   0  -9    2.46    0.29 
   0   3  -9    2.84    0.31 
   0  -3  -9    2.67    0.36 
  -3   3  -9    2.73    0.27 
  -3   3  -9    2.50    0.36 
   0   3  -9    2.71    0.39 
   3  -3  -9    2.62    0.27 
   3  -3  -9    3.01    0.41 
   3   0  -9    2.72    0.38 
   0  -3   9    2.38    0.31 
  -3   3   9    2.96    0.34 
   0   3   9    2.48    0.32 
   3  -3   9    1.50    0.23 
  -3   3   9    2.52    0.28 
   3  -3   9    2.40    0.31 
  -3   0   9    2.38    0.34 
   0   3   9    2.23    0.33 
   3   0   9    2.07    0.29 
   3   0   9    2.89    0.37 
  -1  -3  -9   58.04    1.70 
   3  -4  -9   48.18    1.62 
  -4   1  -9   50.72    1.54 
  -3   4  -9   45.19    1.45 
   3  -4  -9   49.18    1.68 
   1   3  -9   51.40    1.55 
   4  -1  -9   49.41    1.64 
  -4   1  -9   50.53    1.57 
   1   3  -9   49.68    1.77 
   1   3   9   50.03    1.51 
  -3   4   9   47.70    1.52 
   4  -1   9   48.93    1.53 
  -4   1   9   48.64    1.54 
  -4   1   9   49.15    1.64 
   3  -4   9   48.74    1.57 
   3  -4   9   52.51    1.57 
  -1  -3   9   50.44    1.55 
   1   3   9   51.40    1.76 
  -3   4   9   49.39    1.44 
   4  -1   9   47.02    1.71 
   2  -4  -9    0.54    0.20 
  -4   2  -9    0.20    0.15 
  -2  -2  -9    0.43    0.20 
  -2   4  -9    0.28    0.23 
  -4   2  -9    0.41    0.21 
   2   2  -9    0.35    0.19 
   2  -4  -9    0.84    0.27 
   4  -2  -9   -0.05    0.16 
   2   2  -9    0.64    0.27 
  -2  -2  -9    0.41    0.15 
   2  -4   9    0.81    0.22 
  -4   2   9    0.47    0.20 
  -2  -2   9    0.12    0.18 
   2  -4   9    0.51    0.14 
   2   2   9    0.57    0.23 
  -4   2   9    0.18    0.19 
  -2   4   9    0.48    0.19 
   2   2   9    0.70    0.19 
   4  -2   9    0.45    0.21 
   4  -2   9    0.26    0.18 
  -4   3  -9   50.00    1.65 
  -4   3  -9   47.36    1.48 
  -3  -1  -9   50.06    1.58 
   3   1  -9   50.77    1.61 
  -1   4  -9   51.13    1.48 
   4  -3  -9   48.26    1.66 
  -3  -1  -9   51.69    1.51 
   3   1  -9   51.14    1.76 
  -1   4  -9   48.62    1.76 
  -1   4   9   50.47    1.54 
   1  -4   9   49.40    1.55 
  -4   3   9   50.42    1.56 
   3   1   9   49.80    1.52 
  -3  -1   9   50.71    1.58 
  -4   3   9   47.94    1.53 
  -1   4   9   53.64    1.76 
   4  -3   9   49.74    1.54 
   3   1   9   50.01    1.78 
   4  -3   9   48.70    1.64 
   1  -4   9   49.13    1.49 
  -4   0  -9   63.55    1.94 
  -4   0  -9   69.97    1.95 
   4  -4  -9   67.45    2.02 
  -4   4  -9   65.41    2.08 
   0  -4  -9   65.79    2.03 
   0   4  -9   64.02    2.16 
   0   4  -9   65.80    1.88 
   4  -4  -9   63.37    2.08 
   4   0  -9   64.87    2.02 
   0   4   9   65.60    1.89 
   4  -4   9   64.50    2.03 
   4  -4   9   71.87    1.93 
  -4   0   9   64.71    2.09 
   0   4   9   62.74    2.15 
   4   0   9   76.70    2.28 
   4   0   9   65.86    1.89 
  -4   4   9   64.24    1.87 
  -4   4   9   64.14    1.89 
   0  -4   9   52.55    1.85 
  -4   0   9   64.29    1.92 
  -5   1  -9    4.34    0.40 
  -4   5  -9    3.66    0.47 
   1   4  -9    3.48    0.37 
   5  -1  -9    3.60    0.45 
   4  -5  -9    4.51    0.50 
  -5   1  -9    4.14    0.39 
  -1  -4  -9    4.07    0.43 
   1   4  -9    3.76    0.51 
   4  -5  -9    4.34    0.42 
   1   4   9    4.59    0.50 
   4  -5   9    4.03    0.41 
  -5   1   9    4.65    0.49 
  -1  -4   9    4.36    0.41 
   1   4   9    4.28    0.38 
  -5   1   9    4.71    0.44 
   5  -1   9    4.07    0.38 
   5  -1   9    3.81    0.49 
   4  -5   9    3.61    0.36 
  -4   5   9    3.97    0.40 
  -3   5  -9   37.25    1.45 
   3  -5  -9   37.33    1.37 
  -5   2  -9   36.17    1.27 
  -2  -3  -9   37.33    1.30 
   5  -2  -9   33.18    1.30 
   2   3  -9   34.31    1.23 
   3  -5  -9   34.62    1.36 
   2   3  -9   32.58    1.41 
  -5   2  -9   35.57    1.19 
   5  -2   9   37.02    1.23 
  -5   2   9   36.02    1.30 
  -2  -3   9   34.28    1.21 
   3  -5   9   36.12    1.23 
   2   3   9   39.22    1.50 
  -5   2   9   34.41    1.20 
  -3   5   9   36.33    1.23 
   2   3   9   36.15    1.17 
   3  -5   9   35.94    1.24 
   2  -5  -9   54.42    1.89 
   2  -5  -9   56.07    1.84 
   3   2  -9   54.43    1.72 
  -2   5  -9   53.18    1.93 
   5  -3  -9   52.70    1.79 
  -3  -2  -9   52.86    1.72 
   3   2  -9   55.38    1.92 
  -5   3  -9   55.11    1.61 
  -5   3  -9   54.06    1.75 
   5  -3   9   53.84    1.66 
  -5   3   9   53.26    1.64 
   3   2   9   58.33    2.00 
   3   2   9   54.55    1.60 
   2  -5   9   52.73    1.66 
  -3  -2   9   55.56    1.69 
  -5   3   9   54.44    1.71 
   5  -3   9   54.63    1.85 
   2  -5   9   56.49    1.68 
  -2   5   9   50.82    1.64 
  -4  -1  -9    0.10    0.16 
  -1   5  -9   -0.10    0.23 
  -4  -1  -9    0.12    0.18 
  -5   4  -9    0.05    0.20 
   5  -4  -9    0.02    0.21 
  -1   5  -9    0.02    0.14 
   4   1  -9    0.12    0.20 
   1  -5  -9   -0.17    0.17 
  -4  -1   9    0.43    0.24 
  -5   4   9    0.22    0.19 
   4   1   9    0.31    0.23 
  -1   5   9   -0.04    0.15 
  -1   5   9    0.40    0.23 
   5  -4   9    0.09    0.17 
  -5   4   9    0.16    0.17 
  -4  -1   9    0.33    0.20 
   4   1   9   -0.14    0.12 
   5  -4   9    0.20    0.17 
   1  -5   9    0.08    0.17 
   5  -5  -9   70.69    2.22 
  -5   0  -9   69.28    2.06 
   0   5  -9   71.18    2.01 
   5  -5  -9   64.88    2.21 
   5   0  -9   70.51    2.17 
  -5   5  -9   68.92    2.24 
   0  -5  -9   68.08    2.19 
   0   5  -9   68.40    2.34 
  -5   0  -9   69.79    2.08 
   5  -5   9   68.62    2.04 
   5  -5   9   69.44    2.23 
   0   5   9   68.36    2.01 
  -5   0   9   70.19    2.06 
   0   5   9   72.45    2.39 
   5   0   9   80.20    2.49 
   0  -5   9   68.26    2.05 
  -5   5   9   70.99    2.04 
  -5   5   9   71.19    2.02 
  -5   0   9   72.05    2.27 
   5   0   9   69.71    1.98 
   1   5  -9   67.67    2.38 
   5  -6  -9   70.59    2.31 
   6  -1  -9   71.60    2.21 
  -5   6  -9   67.57    2.29 
   1   5  -9   69.39    2.05 
  -1  -5  -9   72.54    2.23 
  -6   1  -9   67.94    2.06 
  -6   1  -9   70.84    2.12 
   5  -6  -9   72.01    2.28 
  -1  -5   9   72.18    2.07 
   1   5   9   69.17    2.44 
   5  -6   9   70.14    2.07 
  -5   6   9   66.62    2.04 
  -6   1   9   71.29    2.26 
  -6   1   9   71.24    2.02 
   6  -1   9   69.41    2.43 
   1   5   9   67.77    2.00 
  -4   6  -9   49.79    1.76 
   4  -6  -9   47.54    1.73 
   2   4  -9   47.56    1.80 
   6  -2  -9   49.47    1.67 
   4  -6  -9   47.79    1.71 
   2   4  -9   48.29    1.55 
  -2  -4  -9   45.91    1.62 
  -6   2  -9   48.09    1.59 
  -6   2  -9   46.22    1.49 
  -6   2   9   46.91    1.64 
   2   4   9   47.80    1.47 
   6  -2   9   48.32    1.81 
  -2  -4   9   48.43    1.53 
   2   4   9   47.72    1.85 
   4  -6   9   46.57    1.54 
   4  -6   9   48.64    1.62 
  -6   2   9   48.35    1.49 
  -4   6   9   46.26    1.52 
   6  -2   9   47.77    1.51 
   3   3  -9    2.08    0.34 
  -6   3  -9    2.19    0.36 
  -3   6  -9    1.71    0.44 
   3  -6  -9    1.92    0.38 
  -3  -3  -9    2.06    0.35 
   6  -3  -9    2.05    0.39 
   3  -6  -9    1.92    0.39 
   3   3  -9    1.97    0.44 
  -6   3   9    1.29    0.28 
   3  -6   9    1.69    0.31 
   6  -3   9    2.14    0.39 
   6  -3   9    1.91    0.32 
  -6   3   9    2.09    0.36 
   3  -6   9    2.14    0.30 
   3   3   9    2.72    0.47 
  -3  -3   9    1.72    0.32 
   3   3   9    1.94    0.28 
  -3   6   9    2.45    0.36 
   6  -4  -9   88.63    2.68 
   2  -6  -9   88.98    2.88 
  -2   6  -9   86.00    2.83 
   4   2  -9   90.19    2.60 
  -4  -2  -9   84.22    2.57 
  -6   4  -9   86.38    2.65 
   2  -6  -9   85.69    2.68 
  -2   6   9   87.52    2.47 
  -4  -2   9   89.87    2.78 
   6  -4   9   89.92    2.46 
  -6   4   9   90.94    2.44 
  -6   4   9   87.35    2.57 
  -4  -2   9   88.20    2.49 
   2  -6   9   86.96    2.49 
   4   2   9   89.72    2.37 
   4   2   9   90.81    2.95 
   6  -4   9   89.02    2.78 
  -1   6  -9   51.50    1.88 
   6  -5  -9   49.13    1.74 
  -5  -1  -9   47.68    1.53 
   1  -6  -9   49.36    1.71 
  -5  -1  -9   47.54    1.60 
  -6   5  -9   49.97    1.73 
   5   1  -9   47.34    1.66 
  -6   5   9   52.25    1.59 
  -6   5   9   48.94    1.55 
   6  -5   9   49.10    1.57 
  -5  -1   9   50.40    1.78 
   5   1   9   53.65    1.98 
  -1   6   9   49.37    1.56 
  -5  -1   9   47.52    1.56 
  -1   6   9   46.99    1.85 
   6  -5   9   47.41    1.73 
   1  -6   9   48.25    1.58 
   0  -6  -9    0.44    0.26 
  -6   6  -9    0.17    0.25 
  -6   0  -9    0.25    0.19 
   6  -6  -9    0.08    0.23 
   6   0  -9    0.47    0.27 
   0   6  -9    0.03    0.30 
   6  -6  -9    0.51    0.27 
  -6   0  -9    0.31    0.23 
   6  -6   9    0.27    0.21 
  -6   0   9    0.10    0.26 
   6   0   9    0.18    0.28 
   6  -6   9    0.30    0.23 
   0  -6   9    0.16    0.21 
   0   6   9    0.22    0.19 
   0   6   9    0.80    0.32 
  -6   6   9    0.70    0.25 
  -6   7  -9   60.22    2.14 
  -7   1  -9   60.28    1.92 
   6  -7  -9   61.59    2.17 
   1   6  -9   59.86    1.88 
  -1  -6  -9   62.54    2.06 
  -7   1  -9   60.76    1.95 
   7  -1  -9   64.41    2.06 
   1   6  -9   57.81    2.18 
   6  -7  -9   59.68    2.09 
   1   6   9   60.71    1.86 
   1   6   9   64.08    2.34 
  -7   1   9   63.48    2.11 
   7  -1   9   60.79    2.31 
  -1  -6   9   65.15    1.92 
   6  -7   9   60.49    1.90 
   6  -7   9   61.43    2.11 
  -6   7   9   58.43    1.93 
  -5   7  -9    0.22    0.29 
   2   5  -9    0.44    0.31 
  -7   2  -9    0.18    0.20 
   5  -7  -9   -0.07    0.22 
   5  -7  -9    0.06    0.25 
  -2  -5  -9    0.39    0.26 
   7  -2  -9    0.46    0.27 
  -7   2  -9    0.37    0.23 
   2   5  -9    0.11    0.23 
  -5   7   9    0.32    0.25 
   5  -7   9    0.12    0.20 
   2   5   9   -0.17    0.24 
   2   5   9    0.22    0.18 
  -7   2   9    0.31    0.26 
   5  -7   9    0.13    0.22 
  -2  -5   9    0.54    0.22 
   7  -2   9    0.57    0.32 
   4  -7  -9   38.97    1.61 
   3   4  -9   41.15    1.64 
   7  -3  -9   40.18    1.49 
   3   4  -9   39.78    1.41 
   4  -7  -9   38.15    1.53 
  -7   3  -9   39.36    1.45 
  -4   7  -9   39.44    1.65 
  -3  -4  -9   39.79    1.47 
   3   4   9   38.60    1.26 
   3   4   9   39.59    1.72 
  -7   3   9   40.92    1.32 
  -4   7   9   39.00    1.38 
   7  -3   9   42.14    1.67 
   4  -7   9   41.10    1.41 
  -7   3   9   39.90    1.48 
  -3  -4   9   39.34    1.36 
   4  -7   9   40.09    1.45 
   7  -4  -9   62.52    2.05 
   4   3  -9   60.44    1.97 
   3  -7  -9   61.16    2.09 
   3  -7  -9   60.45    2.23 
  -3   7  -9   64.36    2.27 
  -7   4  -9   60.90    2.03 
  -4  -3   9   61.11    1.90 
   7  -4   9   59.82    2.18 
   3  -7   9   62.06    1.92 
   7  -4   9   62.77    1.87 
  -7   4   9   66.12    2.01 
  -7   4   9   58.26    1.80 
   4   3   9   66.72    2.37 
  -4  -3   9   60.40    2.15 
   3  -7   9   61.54    1.98 
  -3   7   9   61.65    1.91 
   5   2  -9    0.32    0.28 
  -2   7  -9    0.25    0.32 
   2  -7  -9    0.01    0.23 
   2  -7  -9    0.15    0.28 
  -7   5  -9    0.02    0.22 
  -5  -2  -9    0.50    0.26 
   7  -5  -9    0.25    0.29 
   2  -7   9    0.03    0.20 
   5   2   9    0.08    0.29 
   7  -5   9    0.29    0.25 
   7  -5   9   -0.07    0.16 
  -2   7   9    0.02    0.22 
  -7   5   9   -0.01    0.18 
  -5  -2   9    0.34    0.28 
  -7   5   9    0.21    0.21 
   1  -7  -9   23.49    1.09 
  -7   6  -9   22.39    1.09 
   6   1  -9   22.52    1.07 
   7  -6  -9   24.01    1.10 
  -1   7  -9   22.62    1.20 
  -6  -1  -9   21.99    1.00 
   7  -6   9   22.98    0.97 
   1  -7   9   23.31    1.00 
   7  -6   9   23.61    1.13 
  -6  -1   9   24.23    1.15 
  -1   7   9   22.03    0.96 
  -7   6   9   23.11    0.95 
  -1   7   9   24.02    1.25 
   6   1   9   22.89    1.27 
   7  -7  -9   32.74    1.39 
   7   0  -9   33.97    1.38 
  -7   7  -9   36.11    1.47 
  -7   0  -9   32.78    1.25 
   0   7  -9   34.70    1.54 
  -7   0  -9   30.24    1.26 
   7  -7  -9   32.99    1.47 
   0  -7  -9   33.32    1.38 
   0   7   9   33.68    1.66 
  -7   0   9   35.28    1.45 
   7   0   9   32.48    1.60 
   7  -7   9   33.59    1.26 
   0   7   9   33.70    1.23 
   0  -7   9   33.66    1.27 
   7  -7   9   33.92    1.44 
  -7   7   9   34.97    1.26 
   7  -8  -9    0.57    0.33 
   8  -1  -9    0.45    0.32 
   7  -8  -9    0.01    0.30 
   1   7  -9    0.28    0.36 
  -8   1  -9    0.33    0.26 
  -7   8  -9    0.65    0.37 
  -1  -7  -9    0.33    0.29 
  -8   1  -9    0.51    0.27 
   7  -8   9    0.46    0.29 
  -1  -7   9    0.78    0.28 
  -7   8   9    0.18    0.27 
   8  -1   9    0.23    0.35 
   1   7   9   -0.01    0.31 
   1   7   9    0.73    0.27 
   7  -8   9    0.66    0.29 
  -8   1   9    0.33    0.34 
  -6   8  -9   46.42    1.82 
  -8   2  -9   44.49    1.59 
   2   6  -9   45.27    1.81 
   6  -8  -9   46.23    1.72 
   2   6  -9   43.88    1.53 
   8  -2  -9   43.15    1.65 
  -2  -6  -9   44.91    1.66 
   6  -8  -9   44.51    1.81 
   6  -8   9   42.22    1.67 
  -8   2   9   47.11    1.72 
   8  -2   9   44.81    1.92 
   6  -8   9   42.04    1.52 
  -2  -6   9   45.69    1.53 
  -6   8   9   42.50    1.53 
   2   6   9   44.39    1.45 
   2   6   9   42.29    1.90 
   5  -8  -9   27.19    1.21 
  -3  -5  -9   24.06    1.13 
   8  -3  -9   25.07    1.14 
  -8   3  -9   24.77    1.11 
  -5   8  -9   26.09    1.33 
   3   5  -9   25.46    1.09 
   3   5  -9   27.72    1.31 
   5  -8  -9   24.17    1.26 
   5  -8   9   25.94    1.08 
  -5   8   9   23.84    1.05 
  -3  -5   9   23.47    1.02 
   3   5   9   25.76    1.38 
   8  -3   9   25.55    1.34 
   5  -8   9   25.60    1.14 
  -8   3   9   24.36    1.14 
  -8   4  -9    2.04    0.41 
   4  -8  -9    1.76    0.46 
   4   4  -9    1.73    0.37 
   8  -4  -9    2.22    0.43 
  -4   8  -9    2.84    0.55 
   4  -8  -9    2.41    0.44 
  -4  -4  -9    1.88    0.37 
  -8   4   9    1.79    0.39 
  -4   8   9    2.48    0.40 
   4   4   9    1.71    0.48 
   4  -8   9    1.31    0.33 
   4  -8   9    1.88    0.35 
  -4  -4   9    1.76    0.41 
   8  -4   9    2.14    0.47 
   8  -5  -9   46.19    1.68 
   5   3  -9   45.63    1.67 
  -8   5  -9   45.60    1.68 
  -5  -3  -9   43.08    1.63 
   3  -8  -9   43.06    1.68 
   3  -8  -9   46.29    1.91 
  -3   8  -9   47.70    1.89 
   8  -5   9   45.69    1.83 
  -8   5   9   44.12    1.45 
  -5  -3   9   45.48    1.78 
   5   3   9   46.24    1.97 
   3  -8   9   44.70    1.56 
  -3   8   9   44.79    1.55 
  -8   5   9   45.19    1.62 
  -2   8  -9   29.20    1.42 
   2  -8  -9   28.89    1.47 
   2  -8  -9   28.04    1.28 
   6   2  -9   29.80    1.27 
  -6  -2  -9   31.11    1.25 
  -8   6  -9   26.92    1.26 
   8  -6  -9   27.64    1.27 
  -6  -2   9   30.27    1.37 
   2  -8   9   28.60    1.18 
   8  -6   9   28.85    1.37 
  -8   6   9   29.93    1.19 
   6   2   9   30.13    1.51 
  -2   8   9   29.83    1.17 
   8  -6   9   29.72    1.15 
  -8   6   9   27.01    1.13 
  -1   8  -9    1.15    0.43 
  -8   7  -9    0.75    0.34 
   7   1  -9    0.67    0.35 
  -7  -1  -9    0.53    0.32 
   8  -7  -9    0.71    0.36 
   1  -8  -9    1.26    0.40 
   8  -7   9    0.85    0.30 
   1  -8   9    0.65    0.28 
  -1   8   9    0.72    0.30 
   7   1   9    0.63    0.39 
  -1   8   9    0.67    0.36 
   8  -7   9    0.71    0.34 
  -8   7   9    0.95    0.30 
  -7  -1   9    0.99    0.38 
   8  -8  -9   38.61    1.55 
  -8   8  -9   41.19    1.67 
   8   0  -9   39.69    1.58 
   0  -8  -9   39.54    1.58 
   0   8  -9   36.13    1.67 
  -8   0  -9   38.71    1.47 
   8   0   9   36.78    1.84 
   0  -8   9   36.29    1.40 
   0   8   9   38.19    1.39 
   8  -8   9   38.02    1.64 
   0   8   9   40.68    1.86 
  -8   0   9   36.34    1.60 
   8  -8   9   38.53    1.41 
  -8   8   9   37.06    1.40 
  -9   1  -9   31.84    1.33 
   9  -1  -9   32.10    1.42 
  -8   9  -9   31.63    1.51 
   1   8  -9   28.70    1.50 
   8  -9  -9   31.87    1.56 
  -1  -8  -9   32.91    1.42 
  -1  -8   9   31.11    1.27 
   8  -9   9   29.88    1.27 
  -8   9   9   31.41    1.30 
  -9   1   9   28.19    1.43 
   9  -1   9   31.85    1.70 
   1   8   9   30.54    1.22 
   1   8   9   32.76    1.72 
   8  -9   9   29.78    1.45 
  -7   9  -9   34.15    1.59 
   9  -2  -9   34.57    1.45 
  -9   2  -9   32.41    1.37 
   2   7  -9   35.13    1.62 
   7  -9  -9   34.58    1.63 
  -2  -7  -9   32.55    1.43 
  -7   9   9   33.06    1.35 
   7  -9   9   36.18    1.52 
  -9   2   9   32.99    1.48 
  -2  -7   9   35.28    1.32 
   2   7   9   31.37    1.67 
   9  -2   9   31.62    1.67 
   7  -9   9   36.63    1.37 
   9  -3  -9    0.40    0.34 
   6  -9  -9   -0.01    0.28 
  -3  -6  -9    0.03    0.27 
  -9   3  -9   -0.03    0.26 
   6  -9  -9    0.02    0.31 
  -6   9  -9    0.20    0.38 
   3   6  -9    0.26    0.29 
   6  -9   9   -0.33    0.23 
  -9   3   9   -0.16    0.28 
   6  -9   9   -0.08    0.24 
   3   6   9    0.03    0.32 
  -3  -6   9   -0.15    0.29 
   9  -3   9    0.40    0.37 
  -6   9   9    0.25    0.28 
  -4  -5  -9   35.38    1.36 
   4   5  -9   29.87    1.29 
  -5   9  -9   32.54    1.58 
   5  -9  -9   31.46    1.56 
  -9   4  -9   29.08    1.31 
   9  -4  -9   30.82    1.36 
   5  -9  -9   32.43    1.41 
   4   5   9   32.36    1.62 
   5  -9   9   30.27    1.26 
  -4  -5   9   31.73    1.46 
   9  -4   9   30.17    1.54 
   5  -9   9   30.44    1.33 
  -9   4   9   30.27    1.35 
  -5   9   9   30.17    1.25 
  -5  -4  -9   61.94    2.12 
   4  -9  -9   63.26    2.45 
   4  -9  -9   62.36    2.19 
   9  -5  -9   60.26    2.08 
  -9   5  -9   62.55    2.14 
  -4   9  -9   62.62    2.36 
   5   4  -9   60.26    2.07 
  -9   5   9   59.97    2.07 
   5   4   9   58.50    2.44 
   4  -9   9   59.62    1.99 
   9  -5   9   62.55    2.36 
  -5  -4   9   62.41    2.24 
  -4   9   9   61.00    1.99 
  -3   9  -9    1.14    0.47 
  -6  -3  -9    0.67    0.32 
   3  -9  -9    0.55    0.35 
  -9   6  -9    0.88    0.37 
   3  -9  -9    1.37    0.46 
   9  -6  -9    1.48    0.39 
   6   3  -9    0.13    0.33 
  -3   9   9    1.01    0.34 
   9  -6   9    0.54    0.36 
   3  -9   9    0.80    0.32 
  -6  -3   9    0.63    0.37 
   6   3   9    1.12    0.45 
  -9   6   9    1.30    0.37 
  -7  -2  -9   30.08    1.31 
  -9   7  -9   27.58    1.35 
   2  -9  -9   30.12    1.36 
   7   2  -9   30.53    1.36 
   2  -9  -9   30.51    1.60 
  -2   9  -9   28.50    1.47 
   9  -7  -9   31.94    1.34 
   9  -7   9   28.71    1.45 
  -2   9   9   29.98    1.23 
   7   2   9   29.70    1.61 
   2  -9   9   27.98    1.22 
  -9   7   9   28.95    1.20 
  -7  -2   9   31.03    1.42 
  -9   8  -9   38.46    1.66 
   1  -9  -9   38.28    1.59 
  -8  -1  -9   39.04    1.53 
  -1   9  -9   39.63    1.76 
   8   1  -9   39.59    1.61 
  -1   9   9   39.28    1.46 
  -8  -1   9   40.12    1.69 
  -9   8   9   39.66    1.44 
  -1   9   9   37.34    1.85 
   9  -8   9   36.95    1.70 
   8   1   9   34.69    1.86 
   1  -9   9   39.98    1.51 
   9   0  -9    0.74    0.42 
  -9   9  -9    0.68    0.49 
   0  -9  -9    0.60    0.36 
  -9   0  -9    0.57    0.34 
   0   9  -9    0.20    0.41 
   9  -9   9    0.27    0.36 
   9   0   9    0.67    0.46 
   0   9   9    0.12    0.29 
   9  -9   9    0.29    0.30 
   0   9   9    0.90    0.45 
  -9   0   9    0.78    0.41 
  -9   9   9    0.90    0.33 
   0  -9   9    0.10    0.29 
  10  -1  -9   22.14    1.23 
  -1  -9  -9   22.67    1.23 
   1   9  -9   21.65    1.33 
  -9  10  -9   23.09    1.35 
  -1  -9   9   20.11    1.08 
  10  -1   9   20.97    1.47 
   9 -10   9   21.51    1.27 
  -9  10   9   21.16    1.12 
   9 -10   9   21.25    1.11 
   1   9   9   22.32    1.47 
 -10   1   9   22.55    1.29 
  -8  10  -9    1.26    0.52 
  -2  -8  -9    1.67    0.46 
 -10   2  -9    2.53    0.50 
  10  -2  -9    2.38    0.51 
   8 -10  -9    2.05    0.58 
   2   8  -9    1.56    0.50 
   8 -10   9    2.68    0.53 
  10  -2   9    1.26    0.49 
   8 -10   9    1.09    0.38 
  -8  10   9    1.94    0.46 
 -10   2   9    1.41    0.46 
   2   8   9    2.23    0.57 
  -3  -7  -9   33.53    1.52 
  10  -3  -9   37.99    1.57 
 -10   3  -9   34.48    1.49 
  -7  10  -9   36.00    1.69 
   7 -10  -9   37.00    1.79 
  -3  -7   9   35.97    1.61 
 -10   3   9   38.82    1.64 
  10  -3   9   36.84    1.84 
   3   7   9   36.79    1.88 
   7 -10   9   33.85    1.43 
  -7  10   9   37.60    1.47 
   7 -10   9   36.27    1.61 
 -10   4  -9   24.14    1.21 
  10  -4  -9   25.14    1.23 
  -6  10  -9   25.27    1.48 
  -4  -6  -9   24.68    1.23 
   6 -10  -9   25.48    1.45 
   4   6  -9   23.39    1.17 
   6 -10   9   26.24    1.20 
   6 -10   9   23.87    1.23 
 -10   4   9   27.20    1.30 
  10  -4   9   22.74    1.43 
  -6  10   9   23.17    1.14 
   4   6   9   25.22    1.50 
  -4  -6   9   26.39    1.34 
  -5  10  -9    1.82    0.57 
  -5  -5  -9    0.49    0.37 
  10  -5  -9    1.06    0.40 
   5   5  -9    1.33    0.45 
 -10   5  -9    1.34    0.42 
   5 -10  -9    0.69    0.44 
   5 -10   9    1.22    0.41 
 -10   5   9    0.87    0.39 
  10  -5   9    1.28    0.47 
   5   5   9    1.61    0.54 
  -5  -5   9    1.17    0.43 
  -5  10   9    1.41    0.39 
   4 -10  -9   40.00    1.72 
  -6  -4  -9   42.81    1.68 
  10  -6  -9   40.57    1.61 
   4 -10  -9   41.67    2.01 
 -10   6  -9   42.59    1.71 
  -4  10  -9   45.01    1.94 
   6   4  -9   42.51    1.68 
  -4  10   9   40.54    1.57 
   4 -10   9   43.64    1.60 
   6   4   9   38.76    1.97 
  10  -6   9   43.41    1.92 
  -6  -4   9   41.57    1.76 
 -10   6   9   38.13    1.61 
 -10   7  -9   25.04    1.29 
   3 -10  -9   24.44    1.49 
  -7  -3  -9   25.02    1.23 
  -3  10  -9   25.49    1.41 
   7   3  -9   23.91    1.26 
  10  -7  -9   27.12    1.23 
   3 -10  -9   23.94    1.27 
   3 -10   9   24.22    1.16 
   7   3   9   23.62    1.50 
  -7  -3   9   25.34    1.32 
  10  -7   9   24.74    1.40 
  -3  10   9   23.55    1.15 
  -8  -2  -9    0.74    0.37 
 -10   8  -9    0.65    0.42 
   2 -10  -9    0.92    0.50 
   8   2  -9    0.07    0.37 
   2 -10  -9    0.32    0.35 
  -2  10  -9    0.53    0.45 
   8   2   9    0.25    0.38 
  -8  -2   9   -0.01    0.36 
   2 -10   9    0.23    0.31 
  -2  10   9    0.13    0.31 
  10  -8   9    0.83    0.44 
   1 -10  -9   32.77    1.48 
   1 -10  -9   27.19    1.67 
   9   1  -9   29.49    1.46 
 -10   9  -9   31.57    1.56 
  -9  -1  -9   33.28    1.43 
   1 -10   9   30.65    1.35 
   9   1   9   30.50    1.77 
  10  -9   9   31.41    1.61 
  -9  -1   9   30.38    1.52 
  10   0  -9   24.08    1.32 
 -10  10  -9   23.40    1.40 
   0 -10  -9   22.70    1.28 
  10   0   9   22.58    1.56 
   0  10   9   22.59    1.55 
 -10  10   9   24.50    1.18 
 -10   0   9   22.12    1.34 
   0 -10   9   24.07    1.18 
  10 -10   9   21.88    1.37 
  10 -11   9    0.78    0.38 
 -10  11   9    0.70    0.42 
 -11   2  -9   22.33    1.20 
  -9  11  -9   19.28    1.34 
  -2  -9  -9   20.87    1.23 
  11  -2  -9   20.74    1.24 
   9 -11   9   19.88    1.27 
  -2  -9   9   17.75    1.18 
  -9  11   9   20.16    1.13 
   9 -11   9   19.93    1.12 
 -11   3  -9   32.01    1.46 
   8 -11  -9   34.34    1.78 
  11  -3  -9   31.11    1.51 
  -8  11  -9   27.46    1.61 
  -3  -8  -9   34.51    1.54 
  -3  -8   9   30.70    1.54 
  11  -3   9   28.51    1.73 
  -8  11   9   31.09    1.41 
   8 -11   9   31.09    1.56 
   3   8   9   31.45    1.78 
   8 -11   9   33.06    1.43 
 -11   3   9   31.35    1.54 
   7 -11  -9    0.59    0.49 
   4   7  -9    0.15    0.36 
 -11   4  -9    0.44    0.36 
  -4  -7  -9    0.33    0.37 
  -7  11  -9   -0.62    0.40 
  11  -4  -9   -0.33    0.33 
   7 -11   9    0.28    0.33 
 -11   4   9    0.22    0.38 
   7 -11   9    0.05    0.34 
  -7  11   9   -0.12    0.35 
  11  -4   9   -0.40    0.38 
   4   7   9   -0.35    0.34 
  -4  -7   9    0.22    0.34 
   6 -11  -9   20.78    1.40 
 -11   5  -9   17.08    1.09 
  -6  11  -9   20.23    1.40 
   5   6  -9   18.65    1.10 
  -5  -6  -9   17.14    1.09 
  11  -5  -9   19.37    1.12 
  11  -5   9   15.94    1.27 
  -6  11   9   18.79    1.09 
  -5  -6   9   19.56    1.18 
   5   6   9   17.13    1.33 
   6 -11   9   19.44    1.12 
 -11   5   9   19.36    1.17 
 -11   6  -9   18.70    1.12 
  11  -6  -9   18.21    1.06 
   6   5  -9   18.11    1.08 
  -6  -5  -9   18.49    1.11 
  -5  11  -9   17.49    1.30 
   5 -11  -9   17.59    1.31 
  -6  -5   9   16.81    1.13 
   5 -11   9   15.12    1.01 
 -11   6   9   17.21    1.07 
  11  -6   9   17.57    1.27 
   6   5   9   17.15    1.32 
 -11   7  -9    0.08    0.35 
   7   4  -9    0.63    0.42 
  -4  11  -9    0.89    0.51 
   4 -11  -9   -0.11    0.45 
  -7  -4  -9   -0.12    0.31 
   4 -11   9   -0.36    0.28 
  -4  11   9   -0.09    0.35 
   7   4   9    0.46    0.46 
 -11   7   9   -0.15    0.34 
  11  -7   9   -0.19    0.36 
  -7  -4   9    0.16    0.36 
   3 -11  -9   25.74    1.64 
 -11   8  -9   27.19    1.42 
   8   3  -9   29.02    1.43 
  -8  -3  -9   26.81    1.36 
   3 -11   9   28.64    1.32 
  -8  -3   9   26.12    1.42 
   8   3   9   27.04    1.68 
  -3  11   9   27.66    1.31 
  11  -8   9   26.61    1.56 
   2 -11  -9   26.72    1.69 
  -9  -2  -9   28.35    1.40 
  -2  11   9   29.68    1.33 
   2 -11   9   28.67    1.35 
  11  -9   9   27.63    1.60 
   1 -11  -9    1.63    0.50 
 -10  -1  -9    0.93    0.46 
  -1  11   9    1.82    0.47 
  -8  12  -9   25.27    1.79 
   8 -12  -9   21.19    1.59 
  -4  -8   9   21.58    1.30 
   8 -12   9   23.57    1.37 
  -7  12  -9   27.00    1.68 
  12  -5  -9   29.05    1.39 
   7 -12  -9   26.48    1.69 
   5   7  -9   26.20    1.36 
  -5  -7   9   26.09    1.45 
   6   6  -9    0.33    0.42 
   6 -12  -9    0.20    0.53 
 -12   6   9   -0.01    0.41 
  -6  -6   9    0.07    0.35 
 -12   7   9   22.94    1.29 
   0   0 -10   84.19    2.45 
   0   0 -10   83.31    2.41 
   0   0  10   86.43    2.38 
   0   0  10   81.73    2.28 
   1   0 -10   21.89    0.94 
   0  -1 -10   21.18    0.91 
   1  -1 -10   21.90    0.90 
   1   0 -10   20.60    0.89 
  -1   0 -10   21.68    0.90 
  -1   0 -10   22.53    0.91 
   0   1 -10   20.37    0.87 
  -1   1 -10   22.20    0.86 
  -1   1 -10   22.23    0.94 
   0   1 -10   19.47    0.91 
   1  -1 -10   22.50    0.94 
   0  -1 -10   22.29    0.87 
   0   1  10   23.42    0.93 
  -1   1  10   21.73    0.92 
   0   1  10   24.56    0.82 
   1  -1  10   19.90    0.75 
   1   0  10   21.90    0.89 
   1  -1  10   21.30    0.90 
  -1   0  10   22.64    0.91 
   1   0  10   21.18    0.81 
   0  -1  10   21.89    0.90 
   1   1 -10   98.23    2.74 
   1  -2 -10   93.44    2.66 
  -2   1 -10   93.62    2.77 
  -1   2 -10   98.43    2.86 
   1  -2 -10   97.55    2.79 
  -2   1 -10   94.46    2.69 
  -1  -1 -10   95.45    2.75 
   2  -1 -10   92.98    2.76 
   1   1 -10   96.45    2.86 
  -1  -1 -10   94.90    2.69 
  -1   2 -10   94.79    2.66 
   2  -1 -10   91.63    2.76 
   2  -1  10   95.62    2.75 
  -1   2  10   97.64    2.67 
   2  -1  10   98.42    2.67 
  -1  -1  10  100.00    2.68 
   1   1  10   93.17    2.64 
  -2   1  10   96.47    2.68 
   1  -2  10   94.38    2.66 
  -1   2  10   97.80    2.71 
   1   1  10   98.80    2.79 
  -2   2 -10   22.24    1.00 
   2  -2 -10   21.99    0.89 
   2   0 -10   21.60    0.95 
   0  -2 -10   23.52    0.99 
   2   0 -10   21.33    0.98 
  -2   0 -10   23.29    0.93 
   0   2 -10   23.37    0.91 
  -2   0 -10   23.89    0.93 
   0  -2 -10   23.89    0.86 
  -2   2 -10   25.22    0.89 
   2  -2 -10   21.60    0.95 
   0   2 -10   23.64    1.02 
  -2   0  10   20.92    0.91 
  -2   2  10   22.59    0.94 
   2   0  10   22.49    0.91 
   0  -2  10   21.86    0.93 
   2  -2  10   21.88    0.84 
   2   0  10   21.90    0.91 
   2  -2  10   22.98    0.94 
   0   2  10   23.71    0.91 
   0   2  10   22.00    0.91 
   3  -1 -10   14.99    0.79 
  -1  -2 -10   15.63    0.65 
  -2   3 -10   15.01    0.67 
   2  -3 -10   15.46    0.67 
   1   2 -10   15.23    0.84 
  -3   1 -10   14.98    0.73 
  -2   3 -10   13.40    0.80 
  -3   1 -10   14.55    0.70 
   1   2 -10   14.99    0.72 
  -1  -2 -10   15.30    0.76 
   2  -3 -10   16.22    0.80 
   3  -1  10   14.69    0.72 
  -1  -2  10   14.57    0.75 
  -3   1  10   13.97    0.73 
   3  -1  10   14.97    0.73 
   1   2  10   16.29    0.74 
  -2   3  10   15.81    0.74 
   1   2  10   15.13    0.75 
  -3   1  10   14.74    0.76 
  -2   3  10   15.35    0.65 
   2  -3  10   15.75    0.62 
   2  -3  10   14.30    0.73 
   3  -2 -10   30.07    1.21 
  -3   2 -10   32.18    1.11 
   1  -3 -10   29.81    1.22 
  -1   3 -10   29.60    1.07 
  -1   3 -10   33.58    1.30 
   1  -3 -10   29.64    1.00 
  -2  -1 -10   32.36    1.17 
   2   1 -10   29.87    1.17 
  -2  -1 -10   32.68    1.11 
  -3   2 -10   32.53    1.21 
   2   1 -10   29.51    1.26 
   2   1  10   30.97    1.20 
   1  -3  10   29.30    1.12 
  -3   2  10   33.67    1.17 
  -1   3  10   32.93    1.15 
  -3   2  10   30.75    1.15 
   3  -2  10   34.66    1.19 
   2   1  10   31.15    1.13 
  -1   3  10   31.57    1.15 
   3  -2  10   30.56    1.16 
  -2  -1  10   31.15    1.15 
  -3   3 -10   59.85    1.73 
   3  -3 -10   57.05    1.91 
   3   0 -10   55.75    1.93 
   3   0 -10   61.24    1.91 
  -3   0 -10   60.17    1.80 
  -3   0 -10   61.32    1.83 
  -3   3 -10   56.39    1.94 
   0   3 -10   59.31    1.99 
   0  -3 -10   57.12    1.89 
   0  -3  10   58.57    1.81 
   3   0  10   58.33    1.96 
   0   3  10   59.65    1.79 
   0   3  10   60.07    1.93 
   3  -3  10   57.33    1.79 
   3   0  10   55.02    1.75 
  -3   3  10   59.11    1.80 
  -3   3  10   61.89    1.78 
  -3   0  10   57.35    1.81 
   3  -3  10   61.30    1.83 
  -3   4 -10   10.58    0.74 
   1   3 -10   10.81    0.74 
  -4   1 -10   11.10    0.61 
  -1  -3 -10   10.75    0.65 
  -4   1 -10   12.50    0.65 
   4  -1 -10   10.85    0.70 
   1   3 -10   10.99    0.60 
   3  -4 -10   11.98    0.61 
   3  -4 -10   10.26    0.66 
   3  -4  10   11.26    0.57 
   1   3  10   11.17    0.61 
  -4   1  10   11.81    0.66 
  -1  -3  10   10.61    0.64 
   3  -4  10   12.47    0.66 
   1   3  10   11.96    0.70 
  -3   4  10   10.97    0.62 
  -4   1  10   11.49    0.70 
   4  -1  10   11.21    0.68 
   4  -1  10   10.54    0.61 
  -2   4 -10   79.28    2.20 
   4  -2 -10   76.66    2.40 
  -4   2 -10   80.24    2.27 
   2  -4 -10   75.94    2.42 
   2   2 -10   76.06    2.52 
  -2  -2 -10   81.78    2.39 
   2   2 -10   79.54    2.33 
   2  -4 -10   81.43    2.43 
  -2   4 -10   78.01    2.54 
  -4   2 -10   79.25    2.37 
   2   2  10   80.52    2.52 
   4  -2  10   74.01    2.25 
   2  -4  10   79.24    2.27 
  -4   2  10   80.67    2.37 
  -2   4  10   79.82    2.26 
   2   2  10   79.97    2.25 
  -2  -2  10   77.73    2.28 
   4  -2  10   80.64    2.46 
  -4   2  10   77.30    2.29 
  -3  -1 -10   11.00    0.56 
  -4   3 -10   10.79    0.67 
   4  -3 -10   11.19    0.70 
   1  -4 -10   10.53    0.69 
   3   1 -10   11.72    0.67 
  -4   3 -10   11.51    0.57 
   3   1 -10   10.69    0.75 
  -1   4 -10   10.07    0.54 
  -3  -1 -10   11.35    0.64 
   1  -4  10   11.77    0.64 
  -1   4  10   10.68    0.62 
   4  -3  10   11.78    0.63 
   4  -3  10    9.61    0.61 
   3   1  10   10.21    0.59 
  -1   4  10   12.74    0.69 
   3   1  10   11.36    0.71 
  -3  -1  10   12.33    0.67 
  -4   3  10   11.98    0.62 
  -4   3  10   11.89    0.65 
  -4   4 -10   10.62    0.71 
   0   4 -10   10.69    0.57 
   0   4 -10   10.35    0.75 
   0  -4 -10   10.24    0.67 
   4  -4 -10   10.51    0.71 
  -4   0 -10   10.59    0.61 
   4   0 -10   11.95    0.71 
  -4   0 -10   11.19    0.59 
   4  -4  10   11.38    0.63 
  -4   0  10   10.71    0.63 
  -4   4  10   11.50    0.57 
   0   4  10   11.28    0.62 
   0  -4  10    8.89    0.60 
   0   4  10   10.91    0.68 
  -4   0  10   11.12    0.73 
   4   0  10   11.28    0.61 
   4   0  10   10.83    0.72 
   4  -4  10   10.88    0.62 
  -4   4  10   10.49    0.62 
   4  -5 -10   90.76    2.67 
   4  -5 -10   87.10    2.66 
  -1  -4 -10   71.40    2.56 
  -4   5 -10   89.18    2.76 
  -5   1 -10   90.49    2.55 
  -5   1 -10   86.69    2.49 
   5  -1 -10   86.13    2.63 
   1   4 -10   85.63    2.79 
   1   4 -10   87.02    2.48 
  -4   5  10   85.46    2.46 
   1   4  10   84.94    2.42 
  -5   1  10   88.12    2.67 
  -1  -4  10   85.97    2.47 
   5  -1  10   88.96    2.44 
  -5   1  10   85.82    2.47 
   1   4  10   87.50    2.80 
   4  -5  10   88.70    2.61 
   5  -1  10   88.48    2.81 
   4  -5  10   89.79    2.49 
   3  -5 -10   42.77    1.61 
   2   3 -10   43.83    1.71 
  -3   5 -10   46.02    1.73 
   2   3 -10   45.38    1.50 
   5  -2 -10   43.29    1.58 
  -2  -3 -10   42.17    1.54 
  -5   2 -10   46.01    1.45 
  -5   2 -10   44.25    1.52 
   3  -5 -10   42.34    1.58 
   2   3  10   45.52    1.43 
   3  -5  10   45.05    1.49 
  -5   2  10   42.92    1.46 
  -3   5  10   43.97    1.46 
   2   3  10   45.74    1.70 
  -5   2  10   45.68    1.57 
   5  -2  10   46.12    1.48 
   5  -2  10   42.53    1.64 
  -2  -3  10   42.99    1.49 
   3  -5  10   49.59    1.50 
   2  -5 -10   24.56    1.08 
  -2   5 -10   22.08    1.13 
  -3  -2 -10   21.11    0.97 
   3   2 -10   25.09    1.01 
   5  -3 -10   22.72    1.06 
  -5   3 -10   23.30    1.01 
   2  -5 -10   22.19    1.05 
   3   2 -10   23.94    1.16 
  -2   5  10   22.06    0.94 
   5  -3  10   22.52    1.02 
   2  -5  10   23.85    0.97 
  -3  -2  10   22.43    0.97 
   5  -3  10   24.59    0.99 
   3   2  10   23.71    0.91 
  -5   3  10   24.40    0.98 
  -5   3  10   22.48    0.94 
  -5   4 -10   60.16    1.97 
  -4  -1 -10   58.10    1.87 
   4   1 -10   57.83    1.91 
   1  -5 -10   57.45    1.96 
  -4  -1 -10   60.41    1.78 
   5  -4 -10   57.38    1.98 
  -1   5 -10   61.43    2.12 
  -5   4  10   58.25    1.81 
   4   1  10   60.43    2.13 
   4   1  10   59.37    1.77 
  -4  -1  10   57.94    2.04 
  -1   5  10   57.51    1.80 
   1  -5  10   58.52    1.84 
  -5   4  10   60.54    1.83 
   5  -4  10   58.82    1.82 
  -1   5  10   57.05    2.04 
   5  -4  10   61.46    1.98 
  -4  -1  10   60.07    1.83 
  -5   0 -10   27.86    1.04 
  -5   0 -10   26.89    1.06 
   5  -5 -10   27.09    1.20 
   0   5 -10   27.59    0.99 
  -5   5 -10   26.38    1.18 
   0  -5 -10   26.27    1.14 
   5   0 -10   27.70    1.16 
   0   5 -10   27.64    1.26 
   5  -5  10   23.62    1.02 
   5   0  10   27.12    1.01 
   5   0  10   27.85    1.28 
   0  -5  10   24.42    1.06 
  -5   5  10   26.82    1.05 
  -5   0  10   26.19    1.19 
   5  -5  10   25.96    1.10 
   0   5  10   27.36    1.04 
   0   5  10   24.92    1.20 
  -5   0  10   26.74    1.07 
  -6   1 -10   13.32    0.71 
  -1  -5 -10   13.82    0.81 
   1   5 -10   13.78    0.95 
  -5   6 -10   13.08    0.87 
   1   5 -10   14.30    0.72 
  -6   1 -10   14.41    0.74 
   5  -6 -10   13.30    0.84 
   6  -1 -10   12.77    0.80 
  -6   1  10   14.01    0.75 
  -1  -5  10   14.50    0.76 
  -6   1  10   13.11    0.84 
  -5   6  10   13.44    0.73 
   1   5  10   14.32    0.91 
   5  -6  10   15.69    0.79 
   6  -1  10   14.31    0.91 
   1   5  10   13.15    0.69 
   5  -6  10   12.50    0.72 
   2   4 -10   15.88    0.98 
   4  -6 -10   17.22    0.89 
  -6   2 -10   15.87    0.80 
   6  -2 -10   16.12    0.89 
   4  -6 -10   16.08    0.89 
  -2  -4 -10   15.54    0.84 
   2   4 -10   14.82    0.76 
  -4   6 -10   17.42    1.01 
  -6   2 -10   14.69    0.71 
  -6   2  10   14.90    0.76 
   2   4  10   15.37    0.71 
  -4   6  10   13.83    0.75 
   6  -2  10   15.54    0.76 
  -6   2  10   14.95    0.84 
   2   4  10   16.48    0.96 
   4  -6  10   14.85    0.75 
   4  -6  10   15.95    0.80 
   6  -2  10   15.23    0.92 
  -2  -4  10   14.55    0.78 
   6  -3 -10   81.37    2.45 
   3   3 -10   74.63    2.32 
  -3  -3 -10   75.41    2.37 
  -6   3 -10   77.08    2.39 
   3  -6 -10   80.93    2.56 
   3  -6 -10   76.21    2.47 
   3   3 -10   77.80    2.61 
  -6   3  10   74.65    2.37 
   3   3  10   81.01    2.19 
   3   3  10   77.47    2.65 
   6  -3  10   76.76    2.56 
   3  -6  10   74.79    2.27 
  -3   6  10   76.13    2.25 
  -6   3  10   76.67    2.21 
   6  -3  10   77.70    2.28 
  -3  -3  10   77.56    2.28 
   6  -4 -10   10.02    0.74 
   4   2 -10   11.56    0.72 
  -2   6 -10   10.86    0.84 
   2  -6 -10   10.73    0.76 
  -4  -2 -10    9.70    0.64 
  -6   4 -10   10.61    0.70 
   2  -6 -10   10.57    0.73 
   4   2  10   10.98    0.58 
   6  -4  10   10.93    0.66 
  -6   4  10    9.27    0.63 
  -4  -2  10   11.38    0.67 
  -2   6  10    9.93    0.63 
  -6   4  10   10.72    0.66 
  -4  -2  10   11.24    0.80 
   4   2  10   10.73    0.79 
   2  -6  10   10.10    0.64 
   6  -4  10   12.08    0.74 
  -1   6 -10    5.69    0.66 
  -5  -1 -10    5.45    0.52 
   5   1 -10    5.13    0.56 
   6  -5 -10    5.68    0.61 
  -6   5 -10    4.86    0.56 
   1  -6 -10    5.45    0.56 
  -1   6  10    6.18    0.51 
  -5  -1  10    5.61    0.63 
   1  -6  10    5.84    0.51 
   6  -5  10    6.02    0.55 
   5   1  10    6.83    0.67 
  -6   5  10    5.19    0.46 
  -6   5  10    5.20    0.48 
  -5  -1  10    4.61    0.51 
   6  -5  10    5.44    0.48 
  -1   6  10    5.82    0.58 
   0  -6 -10   56.24    1.94 
  -6   0 -10   53.86    1.77 
   6   0 -10   56.27    1.94 
  -6   0 -10   54.68    1.80 
   6  -6 -10   52.99    1.92 
   0   6 -10   60.93    2.13 
  -6   6 -10   57.27    2.00 
   6  -6  10   52.32    1.75 
   0  -6  10   56.64    1.80 
   6   0  10   56.68    2.16 
   0   6  10   53.92    2.09 
   6  -6  10   54.86    1.94 
  -6   6  10   55.21    1.76 
   0   6  10   56.02    1.75 
  -6   0  10   58.33    2.02 
  -7   1 -10   14.41    0.77 
   1   6 -10   12.24    0.93 
  -7   1 -10   13.19    0.73 
  -6   7 -10   13.57    0.92 
   7  -1 -10   12.82    0.84 
   6  -7 -10   12.77    0.87 
  -1  -6 -10   15.29    0.88 
   1   6  10   12.23    0.91 
   7  -1  10   13.41    0.97 
   6  -7  10   12.96    0.80 
  -6   7  10   13.21    0.76 
  -7   1  10   12.60    0.87 
  -1  -6  10   13.53    0.77 
   6  -7  10   13.04    0.76 
   1   6  10   13.45    0.71 
  -2  -5 -10   34.96    1.41 
  -7   2 -10   35.45    1.35 
   5  -7 -10   36.12    1.47 
   7  -2 -10   39.13    1.47 
   2   5 -10   34.98    1.58 
  -5   7 -10   34.48    1.53 
   5  -7 -10   37.71    1.52 
  -5   7  10   34.65    1.31 
  -2  -5  10   37.68    1.34 
   5  -7  10   36.29    1.40 
   5  -7  10   34.56    1.33 
  -7   2  10   35.69    1.46 
   2   5  10   38.88    1.65 
   2   5  10   35.59    1.24 
   7  -2  10   34.97    1.59 
   7  -3 -10    7.94    0.68 
  -4   7 -10    6.52    0.78 
  -3  -4 -10    7.15    0.61 
   3   4 -10    6.43    0.75 
   3   4 -10    6.63    0.60 
   4  -7 -10    7.37    0.68 
   4  -7 -10    6.28    0.64 
  -7   3 -10    7.87    0.61 
  -4   7  10    5.33    0.52 
  -7   3  10    6.95    0.62 
   7  -3  10    6.37    0.67 
   4  -7  10    6.54    0.57 
  -3  -4  10    7.00    0.56 
   3   4  10    6.06    0.46 
   3   4  10    5.48    0.70 
  -7   3  10    7.69    0.54 
  -3   7 -10   28.67    1.38 
   4   3 -10   27.01    1.15 
   3  -7 -10   28.92    1.32 
   7  -4 -10   26.20    1.21 
  -4  -3 -10   27.35    1.16 
   3  -7 -10   25.16    1.23 
  -7   4 -10   26.05    1.17 
   7  -4  10   27.01    1.09 
  -7   4  10   26.51    1.04 
   7  -4  10   25.53    1.24 
   3  -7  10   26.31    1.11 
  -4  -3  10   26.17    1.29 
  -4  -3  10   26.00    1.09 
  -3   7  10   24.80    1.07 
  -7   4  10   29.97    1.18 
   4   3  10   27.81    1.37 
  -7   5 -10   51.88    1.86 
   2  -7 -10   53.88    2.06 
  -2   7 -10   53.26    2.03 
   7  -5 -10   53.89    1.91 
   2  -7 -10   51.15    1.89 
   5   2 -10   53.75    1.83 
  -5  -2 -10   50.44    1.77 
  -7   5  10   51.48    1.66 
  -5  -2  10   51.65    1.95 
   7  -5  10   52.07    1.70 
  -2   7  10   52.39    1.71 
  -7   5  10   52.77    1.75 
   5   2  10   51.88    2.07 
   2  -7  10   52.20    1.74 
   7  -5  10   54.26    1.95 
   7  -6 -10   11.30    0.81 
  -1   7 -10   10.17    0.87 
  -7   6 -10   11.06    0.80 
   6   1 -10   11.13    0.79 
  -6  -1 -10   11.81    0.73 
   1  -7 -10   11.13    0.79 
   6   1  10   10.60    0.89 
   7  -6  10   11.69    0.78 
   1  -7  10   11.44    0.72 
  -1   7  10   10.56    0.84 
  -1   7  10   11.30    0.70 
  -7   6  10   11.40    0.69 
  -6  -1  10   11.62    0.87 
   7  -6  10   11.02    0.71 
   0   7 -10   20.57    1.21 
  -7   0 -10   20.25    0.93 
   7   0 -10   21.27    1.07 
   0  -7 -10   18.10    1.02 
   7  -7 -10   19.12    1.07 
  -7   0 -10   18.55    0.94 
  -7   7 -10   18.25    1.08 
   0  -7  10   18.69    0.93 
   0   7  10   20.78    1.23 
   0   7  10   17.71    0.89 
   7  -7  10   19.19    1.03 
  -7   7  10   18.99    0.94 
   7   0  10   19.42    1.21 
  -7   0  10   18.35    1.09 
   7  -7  10   19.79    0.94 
  -8   1 -10   49.32    1.71 
   8  -1 -10   46.40    1.80 
   7  -8 -10   45.85    1.80 
  -1  -7 -10   46.41    1.81 
   1   7 -10   47.74    1.98 
  -8   1 -10   47.60    1.65 
  -7   8 -10   48.30    1.94 
  -1  -7  10   48.99    1.68 
  -8   1  10   48.09    1.88 
   1   7  10   47.20    1.60 
   8  -1  10   47.75    2.08 
   1   7  10   50.23    2.09 
   7  -8  10   49.62    1.70 
  -7   8  10   45.55    1.65 
   7  -8  10   48.47    1.86 
   2   6 -10   16.75    0.86 
  -6   8 -10   13.84    1.03 
   2   6 -10   16.23    1.08 
  -2  -6 -10   15.73    0.93 
   8  -2 -10   15.06    0.95 
   6  -8 -10   17.21    1.04 
  -8   2 -10   15.61    0.87 
   6  -8 -10   15.19    0.97 
   8  -2  10   15.19    1.07 
   2   6  10   16.08    1.09 
  -6   8  10   14.59    0.85 
   6  -8  10   15.75    0.87 
  -2  -6  10   16.26    0.85 
   6  -8  10   14.60    0.89 
  -8   2  10   16.48    0.98 
  -3  -5 -10    3.00    0.49 
   5  -8 -10    3.18    0.55 
   8  -3 -10    3.81    0.55 
  -5   8 -10    3.33    0.61 
  -8   3 -10    2.92    0.46 
   3   5 -10    3.54    0.48 
   3   5 -10    3.41    0.60 
   5  -8 -10    3.35    0.52 
  -3  -5  10    3.26    0.46 
   5  -8  10    4.08    0.53 
   3   5  10    3.77    0.63 
  -8   3  10    2.26    0.46 
  -5   8  10    2.99    0.45 
   8  -3  10    2.99    0.57 
   4  -8 -10   45.65    1.92 
  -4   8 -10   47.05    1.95 
   4  -8 -10   43.91    1.74 
   4   4 -10   46.29    1.66 
   8  -4 -10   44.28    1.69 
  -4  -4 -10   45.78    1.68 
  -8   4 -10   42.89    1.66 
  -8   4  10   46.86    1.69 
   8  -4  10   45.25    1.87 
   4   4  10   45.57    1.96 
  -4  -4  10   40.40    1.78 
  -4   8  10   43.62    1.57 
   4  -8  10   46.50    1.61 
   8  -5 -10   14.26    0.92 
  -8   5 -10   15.39    0.91 
  -3   8 -10   16.04    1.09 
   3  -8 -10   16.25    0.97 
  -5  -3 -10   14.73    0.87 
   5   3 -10   14.89    0.90 
   3  -8 -10   16.22    1.06 
   3  -8  10   15.00    0.85 
  -5  -3  10   16.69    1.04 
   5   3  10   15.87    1.09 
  -3   8  10   15.28    0.85 
  -8   5  10   14.65    0.77 
  -8   5  10   15.56    0.87 
   8  -5  10   14.69    0.96 
   6   2 -10   11.18    0.83 
   2  -8 -10   10.31    0.89 
  -6  -2 -10    9.63    0.71 
  -2   8 -10    9.92    0.89 
   2  -8 -10   11.82    0.84 
   8  -6 -10   10.49    0.79 
  -8   6 -10   10.24    0.80 
  -8   6  10   10.88    0.68 
   8  -6  10    9.71    0.80 
  -2   8  10    9.83    0.70 
   8  -6  10   12.83    0.73 
   2  -8  10   11.09    0.73 
   6   2  10    9.41    0.86 
  -6  -2  10   12.15    0.90 
   8  -7 -10   46.95    1.76 
   1  -8 -10   39.93    1.67 
   7   1 -10   42.62    1.68 
  -7  -1 -10   44.70    1.64 
  -1   8 -10   42.24    1.82 
  -8   7 -10   42.05    1.73 
  -1   8  10   44.79    1.93 
   7   1  10   42.07    1.95 
   8  -7  10   42.88    1.54 
  -8   7  10   43.53    1.52 
  -7  -1  10   41.49    1.77 
   8  -7  10   44.96    1.78 
   1  -8  10   41.18    1.56 
  -1   8  10   45.06    1.54 
   0  -8 -10   10.93    0.87 
   8  -8 -10   12.25    0.91 
  -8   0 -10   11.78    0.81 
   8   0 -10   11.27    0.88 
  -8   8 -10   12.65    0.98 
   0   8 -10   10.76    0.98 
   8  -8  10   12.21    0.87 
   0  -8  10   11.11    0.77 
   0   8  10   11.53    1.00 
   0   8  10   11.82    0.76 
   8  -8  10   12.13    0.79 
  -8   8  10   12.37    0.78 
   8   0  10   12.53    1.05 
  -8   0  10   13.05    0.97 
  -1  -8 -10    7.45    0.81 
   1   8 -10    6.98    0.86 
  -9   1 -10    6.45    0.65 
  -8   9 -10    6.44    0.82 
   9  -1 -10    8.32    0.81 
   8  -9  10    7.62    0.69 
   8  -9  10    7.09    0.75 
   1   8  10    7.41    0.98 
  -9   1  10    7.10    0.82 
   1   8  10    6.82    0.62 
  -8   9  10    6.23    0.67 
   9  -1  10    6.63    0.91 
  -1  -8  10    6.22    0.64 
  -2  -7 -10   11.16    0.84 
   2   7 -10   10.76    0.99 
   7  -9 -10   10.68    0.91 
  -7   9 -10   10.80    0.98 
  -9   2 -10    9.93    0.78 
   9  -2 -10   10.50    0.84 
   2   7  10    9.77    0.94 
  -2  -7  10   11.56    0.77 
   9  -2  10    9.95    0.97 
   7  -9  10   10.42    0.77 
  -9   2  10   10.44    0.87 
  -7   9  10   10.47    0.78 
   7  -9  10   12.41    0.87 
   9  -3 -10   54.07    1.98 
  -9   3 -10   53.16    1.92 
   6  -9 -10   53.40    2.02 
   6  -9 -10   53.95    2.15 
   3   6 -10   55.96    1.89 
  -3  -6 -10   55.26    1.98 
  -6   9 -10   55.31    2.22 
  -6   9  10   53.38    1.86 
   3   6  10   53.58    2.29 
   9  -3  10   52.32    2.23 
  -3  -6  10   52.30    2.09 
   6  -9  10   52.23    1.86 
  -9   3  10   55.35    2.03 
   4   5 -10   11.33    0.81 
  -9   4 -10   10.27    0.79 
  -4  -5 -10   10.92    0.80 
   9  -4 -10   11.89    0.83 
   5  -9 -10   12.01    0.90 
  -5   9 -10   11.39    1.03 
   5  -9 -10    9.99    0.91 
   5  -9  10   10.30    0.77 
  -9   4  10   10.47    0.83 
  -4  -5  10   11.11    0.93 
  -5   9  10   10.45    0.75 
   4   5  10   10.88    0.94 
   9  -4  10   10.36    0.93 
  -5  -4 -10   12.12    0.84 
   9  -5 -10   10.85    0.84 
  -9   5 -10   11.35    0.84 
  -4   9 -10   10.83    1.01 
   4  -9 -10   12.93    1.03 
   4  -9 -10   11.61    0.87 
   5   4 -10   11.38    0.86 
  -5  -4  10   13.28    0.97 
   4  -9  10   12.36    0.81 
   5   4  10   11.11    0.97 
  -4   9  10   10.04    0.74 
  -9   5  10   11.92    0.84 
   9  -5  10   10.83    0.91 
   6   3 -10   41.58    1.65 
   3  -9 -10   41.83    1.90 
  -9   6 -10   37.23    1.63 
  -6  -3 -10   39.90    1.60 
  -3   9 -10   41.64    1.83 
   3  -9 -10   40.80    1.69 
   9  -6 -10   39.31    1.61 
   6   3  10   41.54    1.94 
  -9   6  10   41.19    1.59 
   3  -9  10   41.75    1.56 
  -3   9  10   40.22    1.52 
  -6  -3  10   43.95    1.81 
   9  -6  10   40.20    1.78 
   2  -9 -10    7.82    0.87 
  -2   9 -10    6.39    0.81 
  -7  -2 -10    7.05    0.72 
  -9   7 -10    6.30    0.74 
   2  -9 -10    7.39    0.74 
   9  -7 -10    7.67    0.74 
   7   2 -10    8.84    0.81 
  -2   9  10    6.14    0.62 
   2  -9  10    7.95    0.71 
   7   2  10    8.08    0.88 
   9  -7  10    9.48    0.81 
  -7  -2  10    7.08    0.81 
  -1   9 -10    7.81    0.91 
  -9   8 -10    7.59    0.84 
   1  -9 -10    8.09    0.79 
   8   1 -10    8.84    0.83 
  -8  -1 -10    8.72    0.76 
  -1   9  10    9.10    0.93 
  -9   8  10    9.62    0.72 
   1  -9  10   10.22    0.77 
  -8  -1  10    7.92    0.85 
  -1   9  10    8.70    0.70 
   8   1  10    9.34    0.95 
   9  -8  10    8.08    0.78 
   0  -9 -10   42.97    1.79 
   9   0 -10   44.23    1.79 
  -9   9 -10   44.43    1.90 
   0   9 -10   42.20    1.93 
  -9   0 -10   42.23    1.66 
   9  -9  10   40.15    1.83 
  -9   9  10   42.20    1.60 
   9   0  10   44.32    2.10 
   0   9  10   40.51    2.01 
   0  -9  10   43.44    1.63 
   0   9  10   42.74    1.59 
   9  -9  10   41.60    1.60 
  -9   0  10   42.66    1.86 
  -9  10 -10    5.22    0.81 
  -1  -9 -10    5.83    0.77 
   1   9 -10    5.25    0.79 
  10  -1 -10    4.56    0.71 
  10  -1  10    5.14    0.85 
 -10   1  10    6.02    0.79 
   1   9  10    6.56    0.92 
   9 -10  10    6.00    0.81 
  -1  -9  10    6.20    0.74 
  -9  10  10    5.29    0.64 
   9 -10  10    4.69    0.61 
   2   8 -10   21.55    1.35 
  10  -2 -10   22.13    1.24 
  -2  -8 -10   22.14    1.23 
 -10   2 -10   23.08    1.18 
  -8  10 -10   21.57    1.37 
  10  -2  10   20.87    1.46 
  -8  10  10   20.96    1.11 
   8 -10  10   20.83    1.11 
 -10   2  10   21.26    1.28 
   2   8  10   22.72    1.46 
  -3  -7 -10    8.54    0.81 
 -10   3 -10    7.88    0.77 
  -7  10 -10    9.88    1.03 
   7 -10 -10    9.08    0.95 
  10  -3 -10   10.54    0.87 
 -10   3  10    8.88    0.88 
   3   7  10    9.84    1.01 
  -7  10  10    9.98    0.80 
  10  -3  10    9.45    1.01 
  -3  -7  10    9.17    0.87 
   7 -10  10   10.73    0.82 
   6 -10 -10   17.33    1.22 
   4   6 -10   19.23    1.06 
  10  -4 -10   16.19    1.06 
  -4  -6 -10   17.35    1.05 
  -6  10 -10   18.34    1.30 
 -10   4 -10   18.70    1.07 
   4   6  10   20.86    1.34 
  -6  10  10   18.87    1.03 
 -10   4  10   17.93    1.11 
  -4  -6  10   19.08    1.20 
  10  -4  10   17.83    1.25 
   6 -10  10   18.93    1.04 
   5 -10 -10   36.64    1.78 
 -10   5 -10   34.80    1.52 
  10  -5 -10   36.97    1.56 
  -5  -5 -10   34.10    1.52 
  -5  10 -10   38.68    1.81 
   5   5 -10   31.88    1.46 
   5   5  10   34.28    1.79 
  10  -5  10   30.90    1.67 
 -10   5  10   32.31    1.50 
  -5  10  10   35.81    1.44 
  -5  -5  10   33.39    1.61 
   5 -10  10   35.54    1.45 
   4 -10 -10   10.50    1.04 
  -4  10 -10    9.51    1.01 
 -10   6 -10   11.66    0.90 
   4 -10 -10   10.42    0.89 
   6   4 -10   10.84    0.91 
  -6  -4 -10   11.02    0.87 
  10  -6 -10   12.24    0.88 
  10  -6  10   11.78    0.99 
  -4  10  10   11.14    0.84 
  -6  -4  10   11.85    1.00 
   4 -10  10   11.56    0.83 
   6   4  10   11.03    1.03 
 -10   6  10   11.39    0.87 
  -3  10 -10    8.84    0.95 
  10  -7 -10    7.37    0.76 
 -10   7 -10    8.38    0.83 
  -7  -3 -10    6.91    0.78 
   3 -10 -10    7.97    0.93 
   3 -10 -10    8.07    0.81 
   7   3 -10    8.04    0.84 
  -7  -3  10    7.63    0.88 
   7   3  10    7.40    0.86 
  10  -7  10    7.59    0.83 
  -3  10  10    7.73    0.72 
   3 -10  10    6.59    0.71 
   2 -10 -10   40.05    1.98 
   2 -10 -10   37.98    1.70 
  -2  10 -10   39.81    1.85 
 -10   8 -10   40.04    1.75 
   8   2 -10   38.25    1.70 
  -8  -2 -10   40.75    1.66 
  10  -8  10   32.22    1.72 
  -8  -2  10   42.00    1.83 
   2 -10  10   38.10    1.56 
   8   2  10   35.56    1.93 
  -2  10  10   41.56    1.56 
 -10   9 -10   13.20    1.09 
   1 -10 -10   12.43    0.99 
  -1  10 -10   11.08    1.02 
   9   1 -10   11.83    0.99 
  -9  -1 -10   12.53    0.93 
   1 -10 -10   12.79    1.16 
  -1  10  10   13.23    0.90 
  -9  -1  10   12.36    1.04 
   9   1  10   13.41    1.19 
  10  -9  10   14.62    1.08 
   1 -10  10   12.49    0.90 
   0 -10 -10    7.25    0.83 
  10 -10  10    6.97    0.88 
 -10  10  10    7.92    0.78 
   0 -10  10    6.87    0.76 
   9 -11  10    3.60    0.66 
  -2  -9  10    4.24    0.69 
   9 -11  10    3.62    0.61 
 -11   3 -10    7.28    0.81 
  11  -3 -10    7.97    0.85 
  -8  11 -10    6.65    0.94 
  -8  11  10    8.28    0.83 
  -3  -8  10    8.40    0.90 
   8 -11  10    7.68    0.81 
 -11   3  10    8.78    1.01 
  -4  -7 -10   34.41    1.64 
   7 -11 -10   37.91    1.92 
  11  -4 -10   40.64    1.70 
  -7  11 -10   35.98    1.91 
 -11   4 -10   38.24    1.65 
  -7  11  10   37.73    1.59 
  11  -4  10   38.81    1.99 
   4   7  10   38.22    1.99 
  -4  -7  10   36.39    1.75 
   7 -11  10   36.73    1.57 
 -11   4  10   39.43    1.74 
   6 -11 -10    7.40    0.96 
  -6  11 -10    5.54    0.89 
  -5  -6 -10    7.28    0.78 
   5   6 -10    5.61    0.69 
 -11   5 -10    6.27    0.75 
  11  -5 -10    6.54    0.76 
  -5  -6  10    5.92    0.80 
  11  -5  10    5.62    0.86 
   5   6  10    5.50    0.93 
   6 -11  10    6.26    0.74 
 -11   5  10    6.01    0.78 
  -6  11  10    6.11    0.71 
  -5  11 -10    5.64    0.87 
 -11   6 -10    6.75    0.79 
  11  -6 -10    5.23    0.69 
  -6  -5 -10    6.70    0.76 
   6   5 -10    6.23    0.76 
   5 -11 -10    3.85    0.78 
   6   5  10    4.82    0.86 
   5 -11  10    5.91    0.68 
 -11   6  10    7.08    0.80 
  -5  11  10    5.93    0.74 
  11  -6  10    5.32    0.82 
  -6  -5  10    5.12    0.76 
   7   4 -10   30.95    1.49 
   4 -11 -10   31.39    1.78 
 -11   7 -10   30.88    1.52 
  -4  11 -10   31.50    1.64 
  -7  -4 -10   28.44    1.44 
  -4  11  10   28.78    1.39 
  -7  -4  10   29.16    1.55 
   7   4  10   28.54    1.71 
   4 -11  10   28.03    1.35 
  11  -7  10   27.18    1.60 
   3 -11 -10    6.48    0.96 
  -8  -3 -10    6.68    0.79 
  -3  11 -10    6.82    0.88 
  -3  11  10    5.62    0.71 
   3 -11  10    5.23    0.73 
  11  -8  10    5.77    0.84 
  -9  -2 -10    7.94    0.91 
   2 -11 -10    6.84    0.85 
  -6  12 -10   24.83    1.72 
   0   0 -11    0.21    0.20 
   0   0 -11   -0.04    0.17 
   0   0  11   -0.07    0.16 
  -1   0 -11   58.72    1.88 
   1  -1 -11   58.27    1.90 
   1   0 -11   60.41    1.89 
  -1   1 -11   58.56    1.93 
   0   1 -11   60.23    1.94 
  -1   1 -11   59.57    1.85 
  -1   0 -11   58.71    1.88 
   0  -1 -11   61.64    1.85 
   0  -1 -11   57.91    1.90 
   1   0 -11   59.66    1.93 
   0   1 -11   60.07    1.86 
   1  -1 -11   60.80    1.89 
  -1   0  11   58.64    1.84 
   0   1  11   58.06    1.85 
   1  -1  11   61.18    1.86 
   0  -1  11   62.79    1.88 
  -1   1  11   58.19    1.86 
   1   0  11   60.39    1.84 
  -1   2 -11    1.61    0.34 
   2  -1 -11    1.58    0.31 
   1  -2 -11    1.42    0.26 
  -1  -1 -11    1.37    0.32 
  -2   1 -11    1.63    0.30 
  -1   2 -11    1.20    0.28 
   1   1 -11    1.28    0.29 
  -1  -1 -11    1.73    0.29 
   1   1 -11    1.34    0.32 
   1  -2 -11    1.04    0.29 
  -2   1 -11    1.24    0.30 
   2  -1 -11    1.04    0.30 
   1   1  11    1.36    0.24 
  -1   2  11    1.63    0.31 
  -2   1  11    1.65    0.32 
   2  -1  11    1.30    0.28 
   2  -1  11    1.31    0.24 
  -1  -1  11    1.75    0.32 
   1   1  11    1.44    0.30 
   1  -2  11    1.34    0.29 
  -2   0 -11   31.60    1.18 
   2  -2 -11   32.48    1.25 
   2  -2 -11   30.36    1.15 
  -2   0 -11   31.91    1.19 
  -2   2 -11   30.97    1.12 
   0  -2 -11   31.84    1.09 
   0   2 -11   33.14    1.29 
   0  -2 -11   29.68    1.23 
  -2   2 -11   30.70    1.27 
   2   0 -11   30.79    1.26 
   0   2 -11   30.80    1.15 
   2   0 -11   31.33    1.22 
   2   0  11   30.35    1.15 
   2  -2  11   31.88    1.19 
   2   0  11   31.37    1.18 
   0   2  11   29.78    1.17 
   0  -2  11   29.78    1.17 
  -2   0  11   32.17    1.19 
  -2   2  11   31.02    1.19 
   0   2  11   32.68    1.13 
  -2   3 -11   74.62    2.18 
  -1  -2 -11   79.17    2.24 
   1   2 -11   77.38    2.28 
  -3   1 -11   73.18    2.25 
   1   2 -11   75.98    2.44 
   3  -1 -11   74.73    2.35 
  -1  -2 -11   75.86    2.34 
   2  -3 -11   73.46    2.35 
  -2   3 -11   75.47    2.45 
  -3   1 -11   72.59    2.29 
   2  -3  11   72.51    2.24 
   3  -1  11   75.76    2.35 
   3  -1  11   76.22    2.21 
  -3   1  11   77.13    2.25 
  -2   3  11   74.96    2.24 
   1   2  11   74.80    2.34 
  -1  -2  11   75.24    2.25 
   1   2  11   74.43    2.22 
  -2   3  11   80.08    2.22 
  -3   1  11   76.33    2.36 
   2   1 -11   59.37    2.00 
  -3   2 -11   57.81    1.78 
   1  -3 -11   58.57    1.93 
  -2  -1 -11   59.92    1.88 
   2   1 -11   58.49    1.88 
  -3   2 -11   59.33    1.89 
  -2  -1 -11   56.74    1.79 
   3  -2 -11   57.93    1.92 
  -1   3 -11   55.33    1.98 
  -1   3 -11   56.97    1.77 
  -1   3  11   58.65    1.83 
  -2  -1  11   57.69    1.82 
   3  -2  11   56.96    1.84 
  -1   3  11   56.02    1.80 
   3  -2  11   56.49    1.81 
  -3   2  11   56.89    1.83 
   1  -3  11   55.93    1.82 
  -3   2  11   56.05    1.84 
   2   1  11   57.58    1.80 
   3   0 -11    1.69    0.37 
   0   3 -11    1.81    0.31 
   0  -3 -11    1.53    0.33 
  -3   0 -11    1.75    0.30 
  -3   3 -11    2.31    0.30 
   3  -3 -11    1.19    0.31 
   0   3 -11    1.14    0.33 
   3   0 -11    1.45    0.36 
  -3   3 -11    1.83    0.39 
  -3   0 -11    2.02    0.34 
   0   3  11    1.86    0.30 
   3  -3  11    2.15    0.38 
  -3   3  11    1.72    0.34 
   0  -3  11    1.73    0.34 
  -3   0  11    1.89    0.35 
   3  -3  11    2.33    0.30 
   3   0  11    1.64    0.31 
  -3   3  11    1.74    0.29 
   3   0  11    1.22    0.30 
   0   3  11    1.74    0.33 
   4  -1 -11   66.31    2.24 
   1   3 -11   71.97    2.36 
  -1  -3 -11   68.71    2.23 
   3  -4 -11   68.42    2.25 
  -3   4 -11   65.83    2.33 
  -4   1 -11   72.67    2.18 
  -4   1 -11   70.53    2.13 
   1   3 -11   69.18    2.13 
   1   3  11   77.48    2.35 
   4  -1  11   69.46    2.31 
  -4   1  11   70.16    2.27 
  -4   1  11   68.79    2.12 
   3  -4  11   72.84    2.15 
  -3   4  11   71.07    2.12 
  -1  -3  11   68.35    2.14 
   1   3  11   73.01    2.11 
   4  -1  11   70.87    2.09 
  -2   4 -11    0.69    0.31 
   4  -2 -11    0.39    0.27 
  -4   2 -11    0.15    0.22 
   2  -4 -11    0.13    0.22 
  -4   2 -11    0.62    0.24 
   2   2 -11    0.58    0.26 
   2   2 -11   -0.04    0.24 
  -2  -2 -11    0.76    0.26 
  -2  -2  11   -0.09    0.21 
   2  -4  11    0.28    0.23 
   4  -2  11    0.52    0.23 
  -4   2  11    0.10    0.23 
   2   2  11    0.37    0.22 
  -2   4  11   -0.06    0.20 
  -4   2  11    0.12    0.24 
   4  -2  11    0.50    0.24 
   2   2  11    0.06    0.19 
   3   1 -11   31.83    1.28 
  -1   4 -11   34.72    1.18 
  -3  -1 -11   34.33    1.28 
   1  -4 -11   32.70    1.34 
  -4   3 -11   34.12    1.35 
  -3  -1 -11   35.56    1.21 
   4  -3 -11   33.49    1.34 
  -1   4 -11   34.24    1.42 
   3   1 -11   30.78    1.39 
   3   1  11   34.08    1.23 
  -1   4  11   34.19    1.30 
   4  -3  11   34.56    1.28 
   3   1  11   33.69    1.36 
  -3  -1  11   33.08    1.25 
   4  -3  11   34.69    1.27 
  -4   3  11   35.08    1.26 
   1  -4  11   33.20    1.25 
  -4   3  11   32.47    1.26 
  -1   4  11   34.29    1.24 
  -4   0 -11   28.08    1.07 
  -4   0 -11   26.70    1.10 
   0  -4 -11   28.28    1.19 
   0   4 -11   28.98    1.06 
   4   0 -11   27.06    1.16 
   0   4 -11   27.05    1.25 
  -4   4 -11   27.79    1.23 
   4  -4 -11   24.39    1.16 
  -4   4  11   26.45    1.09 
  -4   0  11   26.57    1.22 
   0   4  11   28.21    1.18 
  -4   0  11   27.95    1.10 
   0  -4  11   26.42    1.10 
   4   0  11   26.45    1.20 
   4  -4  11   29.31    1.09 
   0   4  11   26.98    1.08 
   4  -4  11   26.65    1.10 
   4   0  11   25.40    1.06 
   1   4 -11    0.44    0.32 
   5  -1 -11    0.36    0.27 
   1   4 -11    0.81    0.28 
  -1  -4 -11    1.02    0.30 
  -5   1 -11    0.53    0.26 
  -5   1 -11    0.68    0.26 
  -4   5 -11    0.43    0.31 
   4  -5 -11    0.47    0.33 
   4  -5  11    0.45    0.25 
  -5   1  11    0.75    0.32 
   1   4  11    0.45    0.25 
  -4   5  11    0.55    0.26 
  -5   1  11    0.66    0.28 
   5  -1  11    0.14    0.20 
   5  -1  11    0.43    0.27 
  -1  -4  11    0.48    0.27 
   1   4  11    0.54    0.23 
   5  -2 -11   44.08    1.73 
  -3   5 -11   48.17    1.88 
  -5   2 -11   50.08    1.61 
   2   3 -11   51.38    1.67 
   2   3 -11   48.98    1.88 
   3  -5 -11   50.04    1.78 
  -2  -3 -11   51.53    1.75 
  -5   2 -11   51.89    1.71 
  -5   2  11   45.73    1.62 
  -5   2  11   49.77    1.76 
   2   3  11   49.88    1.60 
   5  -2  11   50.72    1.64 
   5  -2  11   48.50    1.79 
   3  -5  11   46.50    1.63 
  -3   5  11   54.06    1.66 
  -2  -3  11   49.63    1.67 
   2   3  11   50.92    1.85 
   3   2 -11   35.96    1.57 
   3   2 -11   37.64    1.41 
   2  -5 -11   37.10    1.50 
  -2   5 -11   40.34    1.60 
   2  -5 -11   39.99    1.48 
   5  -3 -11   36.66    1.49 
  -5   3 -11   38.86    1.45 
  -3  -2 -11   35.89    1.39 
   3   2  11   36.76    1.31 
   2  -5  11   37.65    1.37 
  -2   5  11   38.29    1.35 
   3   2  11   38.09    1.53 
  -5   3  11   37.70    1.39 
   5  -3  11   37.70    1.39 
  -3  -2  11   39.32    1.39 
   5  -3  11   40.03    1.49 
  -5   3  11   38.57    1.38 
   5  -4 -11    0.87    0.34 
  -5   4 -11    0.68    0.30 
  -1   5 -11    1.50    0.38 
  -4  -1 -11    0.77    0.28 
   4   1 -11    0.28    0.29 
   1  -5 -11    0.55    0.30 
  -1   5  11    0.92    0.28 
   4   1  11    1.08    0.33 
   5  -4  11    0.98    0.28 
  -5   4  11    0.94    0.27 
  -5   4  11    0.43    0.26 
  -4  -1  11    1.34    0.32 
   1  -5  11    0.64    0.26 
   4   1  11    1.01    0.25 
   5  -4  11    0.69    0.26 
  -1   5  11    1.32    0.30 
  -4  -1  11    0.67    0.32 
  -5   5 -11   43.64    1.70 
   5   0 -11   44.99    1.66 
   5  -5 -11   44.22    1.69 
   0  -5 -11   43.13    1.65 
  -5   0 -11   42.94    1.49 
   0   5 -11   47.40    1.78 
  -5   0 -11   43.43    1.53 
  -5   0  11   44.31    1.53 
   5  -5  11   46.85    1.56 
   5  -5  11   44.72    1.61 
   5   0  11   43.67    1.47 
  -5   5  11   42.90    1.51 
   0  -5  11   44.30    1.56 
  -5   0  11   43.91    1.72 
   0   5  11   45.23    1.51 
   5   0  11   44.67    1.77 
   0   5  11   45.62    1.74 
  -6   1 -11   49.00    1.69 
  -5   6 -11   52.00    1.95 
   1   5 -11   50.93    1.98 
   6  -1 -11   50.47    1.83 
  -6   1 -11   50.32    1.68 
   5  -6 -11   52.00    1.88 
  -1  -5 -11   49.47    1.80 
   1   5 -11   51.22    1.66 
  -5   6  11   49.90    1.68 
   6  -1  11   49.45    1.96 
  -6   1  11   50.37    1.87 
  -1  -5  11   50.49    1.71 
  -6   1  11   50.45    1.68 
   5  -6  11   49.99    1.71 
   1   5  11   50.00    1.64 
   1   5  11   51.82    1.96 
   5  -6  11   49.41    1.82 
   4  -6 -11   27.73    1.21 
  -4   6 -11   27.47    1.33 
  -6   2 -11   25.14    1.08 
   2   4 -11   25.92    1.07 
   6  -2 -11   23.09    1.14 
   2   4 -11   24.68    1.28 
  -2  -4 -11   25.86    1.16 
   2   4  11   24.91    1.23 
  -2  -4  11   23.32    1.06 
   2   4  11   26.30    1.01 
   6  -2  11   25.50    1.03 
  -6   2  11   26.22    1.19 
   6  -2  11   23.76    1.20 
  -4   6  11   26.61    1.09 
  -6   2  11   25.83    1.07 
   4  -6  11   24.71    1.08 
   3  -6 -11    0.14    0.20 
   3  -6 -11    0.31    0.29 
   3   3 -11   -0.24    0.24 
   6  -3 -11    0.29    0.31 
  -3   6 -11    0.46    0.33 
  -3  -3 -11   -0.03    0.24 
  -6   3 -11    0.24    0.26 
   3   3 -11    0.10    0.31 
  -6   3  11    0.47    0.25 
   3   3  11   -0.11    0.15 
  -3  -3  11    0.08    0.22 
   3   3  11    0.17    0.25 
  -3   6  11    0.37    0.24 
   6  -3  11   -0.35    0.20 
   6  -3  11    0.19    0.20 
   3  -6  11   -0.27    0.21 
  -6   3  11    0.15    0.25 
   2  -6 -11   42.12    1.66 
   2  -6 -11   40.12    1.61 
  -4  -2 -11   40.45    1.51 
  -2   6 -11   41.69    1.75 
  -6   4 -11   42.15    1.59 
   6  -4 -11   39.49    1.59 
   4   2 -11   43.26    1.58 
   4   2  11   41.63    1.73 
  -6   4  11   41.50    1.45 
  -4  -2  11   42.04    1.47 
  -2   6  11   39.83    1.46 
   6  -4  11   41.45    1.48 
   4   2  11   43.03    1.40 
   2  -6  11   43.47    1.50 
  -6   4  11   40.87    1.49 
   6  -4  11   41.64    1.61 
  -4  -2  11   43.01    1.72 
  -5  -1 -11   48.15    1.66 
  -6   5 -11   48.80    1.79 
   6  -5 -11   48.63    1.81 
  -1   6 -11   47.37    1.88 
   5   1 -11   52.88    1.78 
   1  -6 -11   44.02    1.74 
   1  -6  11   47.95    1.65 
  -1   6  11   46.90    1.84 
   5   1  11   47.25    1.91 
  -5  -1  11   48.07    1.61 
   6  -5  11   47.59    1.76 
  -1   6  11   45.21    1.58 
   6  -5  11   46.23    1.61 
  -6   5  11   48.06    1.62 
  -5  -1  11   47.83    1.86 
  -6   0 -11    1.06    0.32 
   6  -6 -11    1.50    0.40 
   0   6 -11    1.78    0.47 
   0  -6 -11    0.86    0.36 
  -6   6 -11    1.53    0.42 
   6   0 -11    1.67    0.39 
  -6   0 -11    0.90    0.30 
   0  -6  11    1.05    0.32 
   6   0  11    0.94    0.38 
   0   6  11    1.14    0.36 
   6  -6  11    1.08    0.31 
  -6   6  11    0.64    0.30 
   6  -6  11    1.14    0.30 
  -6   0  11    0.58    0.38 
   0   6  11    1.28    0.31 
   1   6 -11   36.84    1.67 
  -6   7 -11   37.56    1.62 
   7  -1 -11   41.12    1.56 
  -7   1 -11   37.39    1.37 
   6  -7 -11   38.39    1.58 
  -7   1 -11   36.46    1.39 
  -1  -6 -11   27.24    1.43 
  -6   7  11   35.21    1.39 
   1   6  11   35.53    1.32 
   7  -1  11   39.13    1.72 
   6  -7  11   36.81    1.48 
  -7   1  11   37.74    1.60 
  -1  -6  11   35.17    1.38 
   6  -7  11   39.00    1.42 
   1   6  11   37.79    1.65 
  -7   2 -11   -0.14    0.22 
  -2  -5 -11    0.12    0.28 
   2   5 -11   -0.14    0.32 
  -5   7 -11    0.02    0.36 
   5  -7 -11   -0.19    0.28 
   7  -2 -11    0.17    0.33 
   2   5 -11    0.37    0.30 
  -5   7  11    0.49    0.31 
  -7   2  11    0.06    0.31 
   7  -2  11    0.25    0.33 
   2   5  11    0.30    0.21 
   5  -7  11    0.18    0.26 
   2   5  11    0.49    0.32 
  -2  -5  11    0.61    0.29 
   3   4 -11   20.36    1.01 
  -4   7 -11   21.48    1.27 
  -7   3 -11   22.30    1.05 
   3   4 -11   20.21    1.23 
   7  -3 -11   21.58    1.12 
   4  -7 -11   19.68    1.10 
   4  -7 -11   22.31    1.13 
  -3  -4 -11   21.20    1.06 
   7  -3  11   22.00    1.17 
  -7   3  11   23.71    0.99 
   4  -7  11   21.71    1.02 
   3   4  11   21.51    1.18 
  -3  -4  11   22.63    1.03 
  -4   7  11   22.03    1.01 
   3   4  11   21.80    0.92 
  -7   3  11   22.34    1.11 
  -7   4 -11   39.12    1.53 
   3  -7 -11   40.30    1.66 
   3  -7 -11   37.88    1.59 
  -4  -3 -11   40.76    1.53 
   7  -4 -11   31.59    1.54 
   4   3 -11   38.90    1.51 
  -3   7 -11   42.53    1.77 
   7  -4  11   40.50    1.45 
   3  -7  11   39.14    1.45 
  -7   4  11   40.16    1.40 
  -3   7  11   39.00    1.45 
   7  -4  11   37.80    1.61 
   4   3  11   41.44    1.75 
  -7   4  11   41.26    1.52 
  -4  -3  11   38.32    1.67 
  -4  -3  11   40.97    1.46 
   2  -7 -11    0.16    0.31 
   5   2 -11    0.45    0.34 
  -5  -2 -11    0.72    0.31 
  -2   7 -11    0.45    0.38 
  -7   5 -11    0.31    0.31 
   2  -7 -11    0.82    0.33 
   7  -5 -11    0.27    0.34 
   5   2  11    0.24    0.32 
   2  -7  11    0.43    0.29 
  -7   5  11    0.22    0.26 
  -7   5  11    0.76    0.31 
  -2   7  11    0.20    0.26 
   7  -5  11    0.16    0.26 
   7  -5  11    0.23    0.27 
  -5  -2  11   -0.34    0.30 
   6   1 -11   34.80    1.45 
   7  -6 -11   33.36    1.48 
  -6  -1 -11   32.79    1.34 
   1  -7 -11   35.89    1.51 
  -7   6 -11   33.48    1.48 
  -1   7 -11   32.31    1.54 
  -6  -1  11   34.81    1.58 
   7  -6  11   35.72    1.35 
  -1   7  11   34.11    1.55 
   6   1  11   34.66    1.63 
   1  -7  11   35.76    1.37 
  -7   6  11   34.34    1.31 
  -1   7  11   32.25    1.29 
   7  -7 -11   25.38    1.29 
   0   7 -11   26.96    1.42 
   7   0 -11   25.77    1.23 
   0  -7 -11   24.74    1.24 
  -7   7 -11   25.11    1.31 
  -7   0 -11   24.70    1.11 
   7  -7  11   25.81    1.24 
   7   0  11   26.01    1.40 
   0   7  11   27.07    1.38 
   0   7  11   25.22    1.11 
  -7   0  11   25.21    1.33 
   0  -7  11   25.37    1.16 
   7  -7  11   26.18    1.16 
  -7   7  11   23.61    1.09 
   8  -1 -11    0.85    0.37 
  -8   1 -11    1.61    0.40 
  -1  -7 -11    1.25    0.43 
  -7   8 -11    0.44    0.44 
   1   7 -11    0.32    0.42 
   7  -8 -11   -0.01    0.35 
   1   7  11    1.29    0.33 
  -1  -7  11    0.97    0.34 
   7  -8  11    1.16    0.37 
   1   7  11    1.05    0.43 
   7  -8  11    0.18    0.31 
   8  -1  11    1.86    0.53 
  -7   8  11    0.75    0.36 
  -8   1  11    0.90    0.42 
   6  -8 -11   31.04    1.44 
  -2  -6 -11   30.95    1.38 
   8  -2 -11   30.51    1.43 
  -6   8 -11   27.53    1.48 
  -8   2 -11   30.70    1.29 
   2   6 -11   29.93    1.53 
   2   6  11   29.47    1.16 
   8  -2  11   29.50    1.51 
  -6   8  11   29.40    1.26 
  -8   2  11   29.73    1.41 
  -2  -6  11   30.09    1.27 
   2   6  11   29.91    1.53 
   6  -8  11   31.72    1.31 
   3   5 -11   31.93    1.56 
  -5   8 -11   31.20    1.58 
   5  -8 -11   32.40    1.44 
  -3  -5 -11   29.25    1.33 
   8  -3 -11   30.70    1.39 
  -8   3 -11   30.54    1.31 
   3   5 -11   30.36    1.28 
  -8   3  11   32.71    1.42 
   5  -8  11   28.89    1.26 
  -5   8  11   28.93    1.29 
   8  -3  11   29.18    1.50 
  -3  -5  11   30.27    1.27 
   3   5  11   33.16    1.58 
   4   4 -11    0.86    0.36 
   4  -8 -11    0.77    0.39 
  -8   4 -11    1.46    0.40 
   4  -8 -11    0.79    0.37 
   8  -4 -11    0.72    0.39 
  -4   8 -11    0.95    0.46 
  -4  -4 -11    0.47    0.32 
  -8   4  11    1.55    0.41 
  -4   8  11    1.17    0.38 
   4   4  11    1.20    0.42 
  -4  -4  11    0.30    0.35 
   4  -8  11    1.55    0.39 
   8  -4  11    1.10    0.42 
   8  -5 -11   36.10    1.54 
   5   3 -11   36.63    1.49 
  -8   5 -11   32.40    1.45
[truncated: 109,686 more chars]
